# Supplementary material for: Synthesis of axially chiral biaryls via Pd(ii)-catalysed direct C(sp2)–H arylation
Source: Royal Society of Chemistry journal article supplement (doi:10.1039/d4qo00958d), 2024-01-01
Supplement: d4qo00958d1.pdf [file d4qo00958d1.pdf]

## Supporting Information

# Synthesis of Axially Chiral Biaryls via Pd(II)-Catalysed Direct C(sp<sup>2</sup>)-H Arylation

Diksha Parmar,<sup>a,b</sup> Rohit Kumar,<sup>a,b</sup> Sarthi,<sup>a</sup> Akhilesh K. Sharma<sup>c,\*</sup> and Upendra Sharma<sup>a,b,\*</sup>

<sup>a</sup>*C-H Activation & Phytochemistry Lab, Chemical Technology Division, CSIR-Institute of Himalayan Bioresource and Technology, Palampur 176061, India*

<sup>b</sup>*Academy of Scientific and Innovative Research (AcSIR), Ghaziabad-201002, India*

<sup>c</sup>*Institute of Chemical Research of Catalonia (ICIQ-CERCA), The Barcelona Institute of Science and Technology, Av. Països Catalans, 16, Tarragona 43007, Spain.*

\*upendra@ihbt.res.in; upendraithbt@gmail.com (US); E-mail: aksharma@iciq.es (AKS)

### Table of Contents

| Entry | Title                                                  | Page No.    |
|-------|--------------------------------------------------------|-------------|
| 1.    | Experimental Section                                   | SI2-SI3     |
| 2.    | Optimization studies                                   | SI3-SI6     |
| 3.    | Gram scale synthesis                                   | SI6         |
| 4.    | Reduction of product 3a                                | SI7         |
| 5.    | Deuterium labelling experiments                        | SI7-SI8     |
| 6.    | Characterization data of synthesised molecules         | SI8-SI21    |
| 7.    | <sup>1</sup> H, <sup>13</sup> C and HPLC spectral data | SI21-SI81   |
| 8.    | Computational Data                                     | SI82-SI109  |
| 9.    | XRD Data                                               | SI110-SI112 |
| 11.   | References                                             | SI112-SI113 |

## 1. Experimental Section

### 1.1 Reagent Information

All the reactions were performed in screw-cap reaction vials under air, unless an inert atmosphere is stated. All solvents were bought from Aldrich in sure seal bottles and used as such. All chemicals were bought from Sigma-Aldrich, Alfa Aesar, and TCI. For column chromatography, silica gel (230–400 mesh) from Merck was used. A gradient elution using EtOAc/*n*-hexane was performed based on Merck aluminum TLC sheets (silica gel 60F254).

### 1.2 Analytical Information

For heating screw cap vials, IKA dry blocks were used and gram scale synthesis was carried out on preheated oil bath. The melting points were recorded on a Bronsted Electrothermal 9100. All isolated compounds were characterized by <sup>1</sup>H NMR, <sup>13</sup>C NMR, ESI-MS, Fourier transform infrared (FTIR), and high-resolution mass spectrometry (HRMS). Mass spectrometry was recorded on Q-TOF-Micromass and maXis Impact mass spectrometers. Copies of <sup>1</sup>H and <sup>13</sup>C NMR are attached in the Supporting Information. IR was analyzed by Shimadzu IR Prestige-21 with ZnSe single-reflection ATR accessory. Nuclear magnetic resonance was performed on Bruker-Avance 600 MHz instrument. All <sup>1</sup>H NMR experiments are reported in units, parts per million (ppm), and measured relative to the deuterated chloroform signal (7.260). All proton decoupled <sup>13</sup>C NMR spectra are reported in ppm relative to deuterated chloroform (77.16).

### 1.3 General procedure for the preparation of 1-arylisquinolines-*N*-oxides

Quinoline *N*-oxides **1a-h**, were prepared from the reported method.<sup>1</sup> A 50 mL round bottom flask was charged with a solution of 1-chloroisoquinoline (1.0 mmol) and Pd(PPh<sub>3</sub>)<sub>4</sub> (3.0 mol %) in 1,4-dioxane (6 mL) under an argon atmosphere. A solution of Na<sub>2</sub>CO<sub>3</sub> (2.0 equiv.) in H<sub>2</sub>O (2 mL) and a solution of corresponding boronic acid (1.1 equiv.) in MeOH (1.6 mL) were sequentially added. The reaction mixture was stirred at 85 °C overnight, cooled to room temperature, quenched with H<sub>2</sub>O (10 mL) and extracted with CH<sub>2</sub>Cl<sub>2</sub> (3×20 mL). The combined organic layers were dried over Na<sub>2</sub>SO<sub>4</sub>, filtrated, evaporated in vacuo. The crude 1-aryl-isoquinoline was purified by flash column chromatography using *n*-hexane/ethyl acetate as eluent.

To a solution of the 1-arylisquinoline (1.0 mmol) in CH<sub>2</sub>Cl<sub>2</sub> (20 mL) was added *m*-chloroperoxybenzoic acid (1.5 equiv.). The reaction mixture was stirred at room temperature for 24 hours. Then the reaction mixture was quenched with saturated Na<sub>2</sub>CO<sub>3</sub> aqueous solution and extracted with CH<sub>2</sub>Cl<sub>2</sub> (3×20 mL). The combined organic layers were washed with brine, dried over Na<sub>2</sub>SO<sub>4</sub> and filtrated. The solvent was removed under reduced pressure and the

residue was purified by flash column chromatography using *n*-hexane/ethyl acetate as eluent to afford 1-arylisquinoline *N*-oxide.

#### 1.4 General procedure for asymmetric arylation of 1-arylisquinoline *N*-oxides with iodoarenes

To an oven-dried screw cap reaction vial charged with a spin vane magnetic stir-bar, 1-arylisquinoline *N*-oxide (0.1 mmol), iodoarene (2.0 equiv.), Pd(OAc)<sub>2</sub> (10 mol%), *N*-Ac-Phe-OH (30 mol%), Ag<sub>2</sub>CO<sub>3</sub> (3.0 equiv.), and HFIP (0.5 mL) were added. The subsequent mixture was stirred at 60 °C for 36 h. After completion, the solvent was evaporated under reduced pressure, and the crude mixture was purified by flash chromatography using silica gel (230-400 mesh size) and EtOAc/*n*-hexane as the eluent.

#### 1.5 General procedure for achiral arylation of 1-arylisquinoline *N*-oxides with iodoarenes

To an oven-dried screw cap reaction vial charged with a spin vane magnetic stir-bar, 1-arylisquinoline *N*-oxide (0.1 mmol), iodoarene (2.0 equiv.), Pd(OAc)<sub>2</sub> (10 mol%), AgTFA (3.0 equiv.) and HFIP (0.5 mL) were added. The subsequent mixture was stirred at 100 °C for 24 h. After completion, the solvent was evaporated under reduced pressure, and the crude mixture was purified by flash chromatography using silica gel (230-400 mesh size) and EtOAc/*n*-hexane as the eluent.

## 2. Optimization studies

### 2.1 Ligand screening

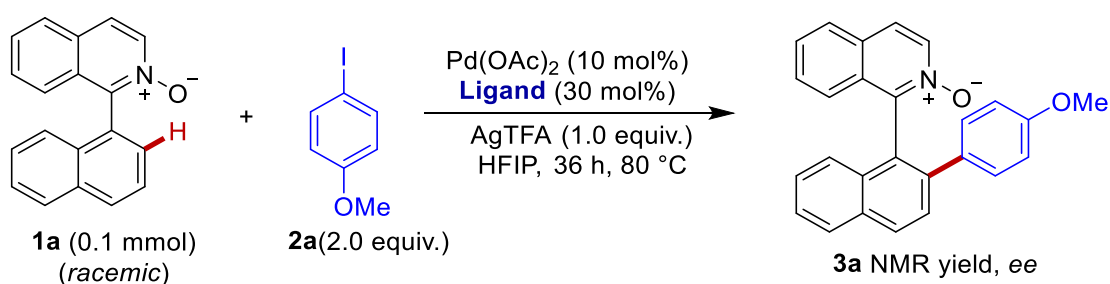

| S No. | Ligand | Yield (%) | ee (%) |
|-------|--------|-----------|--------|
| 1     |        | 98        | 0      |

|           |                                                                                     |           |          |
|-----------|-------------------------------------------------------------------------------------|-----------|----------|
| 2         | 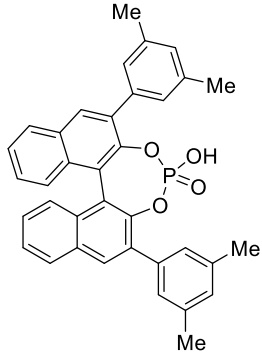   | 98        | 0        |
| 3         |    | 97        | 0        |
| 4         | AdCOOH                                                                              | 98        | 0        |
| 5         |  | 96        | 0        |
| 6         |  | 98        | 0        |
| 7         | <i>N</i> -Ac-Gly-OH                                                                 | 96        | 0        |
| 8         | <i>N</i> -Ac-( <i>L</i> )-Leu-OH                                                    | 98        | 0        |
| 9         | <i>N</i> -Ac-( <i>L</i> )-Val-OH                                                    | 98        | 0        |
| <b>10</b> | <b><i>N</i>-Ac-(<i>L</i>)-Phe-OH</b>                                                | <b>92</b> | <b>5</b> |
| 11        | <i>N</i> -Boc-( <i>L</i> )-Ala-OH                                                   | 98        | 0        |
| 12        | <i>N</i> -Boc-( <i>L</i> )-PheAla-OH                                                | 98        | 0        |
| 13        | <i>N</i> -Boc-( <i>L</i> )-TLE-OH                                                   | 98        | 0        |
| 14        | <i>N</i> -Boc-( <i>L</i> )-Leu-OH                                                   | 97        | 0        |
| 15        | <i>N</i> -Boc-( <i>L</i> )-Gly-OH                                                   | 98        | 0        |
| 16        | <i>N</i> -Fmoc-( <i>L</i> )-Leu-OH                                                  | 97        | 0        |

## 2.2 Oxidant screening

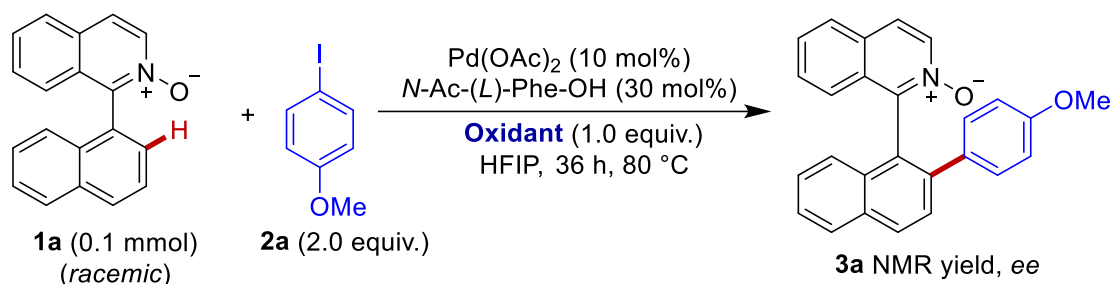

| S No.    | Oxidant                             | Yield (%) | <i>ee</i> (%) |
|----------|-------------------------------------|-----------|---------------|
| 1        | AgTFA                               | 97        |               |
| 2        | AgOAc                               | 22        | 27            |
| <b>3</b> | <b>Ag<sub>2</sub>CO<sub>3</sub></b> | <b>48</b> | <b>88</b>     |
| 4        | LiOAc                               | nr        | -             |
| 5        | NaOAc                               | 20        | 6             |
| 6        | KOAc                                | 20        | 12            |

## 2.3 Oxidant amount screening

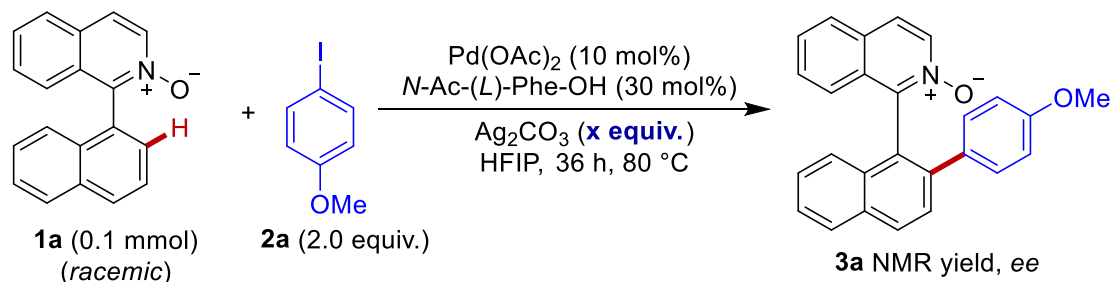

| S No.    | Ag <sub>2</sub> CO <sub>3</sub> (x equiv.) | Yield (%) | <i>ee</i> (%) |
|----------|--------------------------------------------|-----------|---------------|
| 1        | 1                                          | 56        | 73            |
| 2        | 2                                          | 55        | 76            |
| <b>3</b> | <b>3</b>                                   | <b>48</b> | <b>88</b>     |

## 2.4 Solvent screening

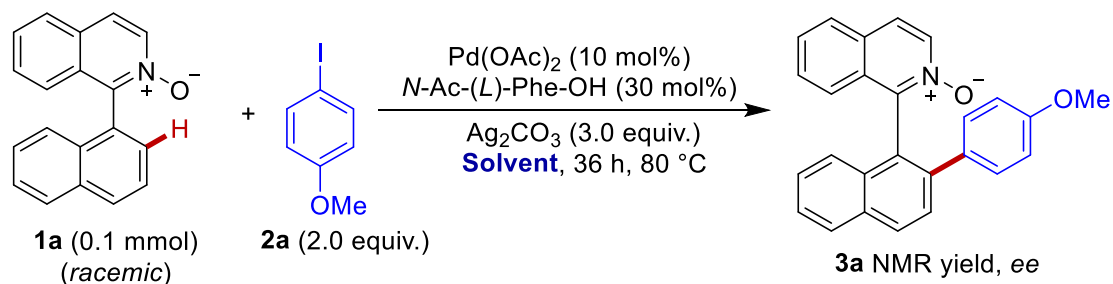

| S No.    | Solvent         | Yield (%) | ee (%)    |
|----------|-----------------|-----------|-----------|
| <b>1</b> | <b>HFIP</b>     | <b>48</b> | <b>88</b> |
| 2        | HFIP:MeCN (1:1) | nr        | -         |
| 3        | HFIP:DME (1:1)  | 23        | 62        |
| 4        | HFIP:THF (1:1)  | 21        | 62        |
| 5        | TFE:DME (1:1)   | nr        | -         |

## 2.5 Temperature screening

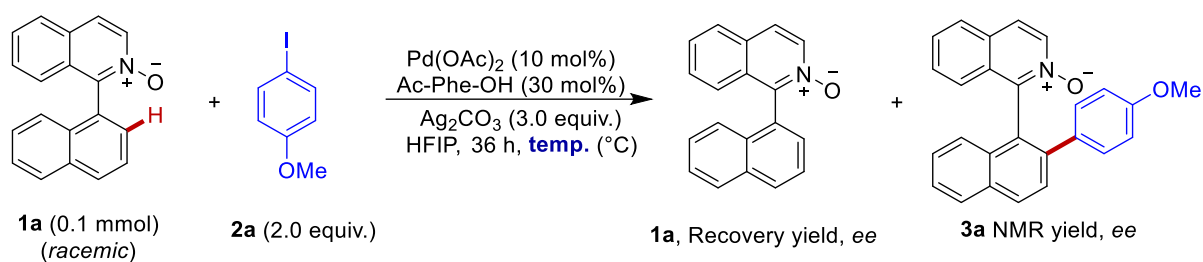

| S No.    | Temp.     | 1a, Recovery Yield (%) | ee (%)    | 3h, Isolated Yield (%) | ee (%)    |
|----------|-----------|------------------------|-----------|------------------------|-----------|
| 1        | 25        | 69                     | 30        | 24                     | 96        |
| 2        | 40        | 66                     | 42        | 32                     | 94        |
| <b>3</b> | <b>60</b> | <b>52</b>              | <b>46</b> | <b>45</b>              | <b>92</b> |
| 4        | 70        | 49                     | 53        | 48                     | 88        |
| 5        | 80        | 45                     | 49        | 48                     | 88        |
| <b>6</b> | 100       | 45                     | 48        | 48                     | 85        |

## 3. Gram scale synthesis

To an oven-dried screw cap reaction vial charged with a spin vane magnetic stir-bar, 1-arylisquinoline *N*-oxide (5.0 mmol), iodoarene (2.0 equiv.), Pd(OAc)<sub>2</sub> (10 mol%), *N*-Ac-Phe-OH (30 mol%), Ag<sub>2</sub>CO<sub>3</sub> (3.0 equiv.) and HFIP (25.0 mL) were added. The subsequent mixture was stirred at 60 °C for 96 h. After completion, the solvent was evaporated under reduced pressure, and the crude mixture was purified by flash chromatography using silica gel (230-400 mesh size) and EtOAc/*n*-hexane as the eluent.

## 4. Reduction of product 3a

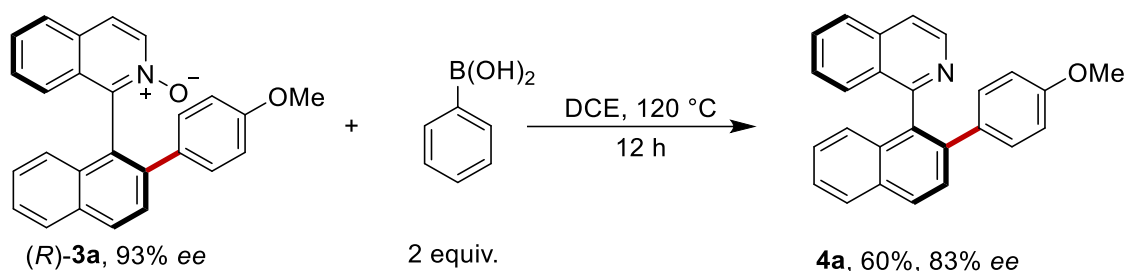

To an oven-dried screw cap reaction vial charged with a spin vane magnetic stir-bar, product **3a** (0.1 mmol, 93% ee), phenyl boronic acid (2 equiv.) and DCE (0.5 mL) were added. The subsequent mixture was stirred at 120 °C for 12 h. After completion, the solvent was evaporated under reduced pressure and **4a** was isolated from column chromatography (30% EtOAc/*n*-hexane) as white viscous, yield (60%).

## 5. Deuterium labelling experiments

### ➤ Deuterium labelling experiments without coupling partner

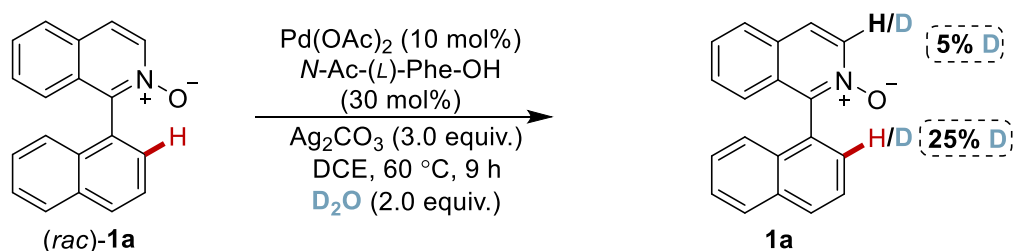

To an oven-dried screw cap reaction vial charged with a spin vane magnetic stir-bar, 1-arylisquinoline *N*-oxide (0.1 mmol), Pd(OAc)<sub>2</sub> (10 mol%), *N*-Ac-Phe-OH (30 mol%), Ag<sub>2</sub>CO<sub>3</sub> (3.0 equiv.), and DCE (0.5 mL) were added. The subsequent mixture was stirred at 60 °C for 9 h. After completion, the solvent was evaporated under reduced pressure, and the crude mixture was purified by flash chromatography using silica gel (230-400 mesh size) and EtOAc/*n*-hexane as the eluent.

### ➤ Deuterium labelling experiments with coupling partner

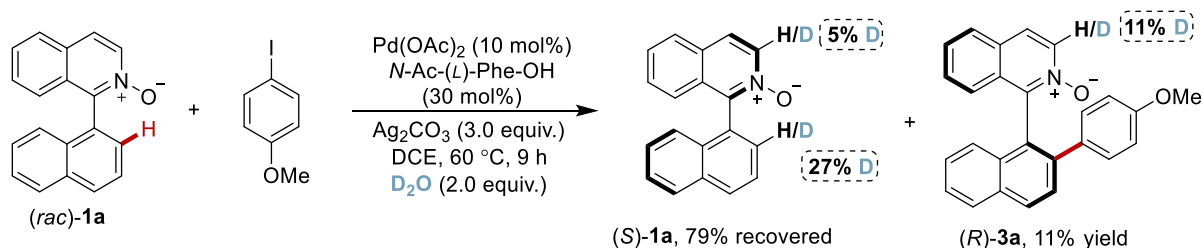

To an oven-dried screw cap reaction vial charged with a spin vane magnetic stir-bar, 1-arylisquinoline *N*-oxide (0.1 mmol), iodoarene (2.0 equiv.), Pd(OAc)<sub>2</sub> (10 mol%), *N*-Ac-Phe-OH (30 mol%), Ag<sub>2</sub>CO<sub>3</sub> (3.0 equiv.), and DCE (0.5 mL) were added. The subsequent mixture was stirred at 60 °C for 9 h. After completion, the solvent was evaporated under reduced pressure, and the crude mixture was purified by flash chromatography using silica gel (230-400 mesh size) and EtOAc/*n*-hexane as the eluent.

## 6. Characterization data of synthesised molecules

*(S)*-1-(Naphthalen-1-yl)isoquinoline-*N*-oxide (Table 2, Entry **1a**): Solid (14.1 mg, 52% yield,

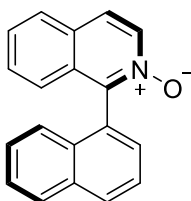

46% *ee*). Analytical data for **1a**:  $[\alpha]_{\text{D}}^{20} = +144$  (*c* = 0.10, Acetone, 46% *ee*). The enantiomeric excess was determined by (Chiralcel<sup>®</sup>-ODH, *n*-hexane/*i*-PrOH 80:20, 0.8 mL/min, detection at 254 nm): = *t<sub>r</sub>* (major) = 20.6 min, *t<sub>r</sub>* (minor) = 27.0 min, 46% *ee*.

*(R)*-1-(2-(4-methoxyphenyl)naphthalen-1-yl)isoquinoline 2-oxide (Table 2, Entry **3a**):

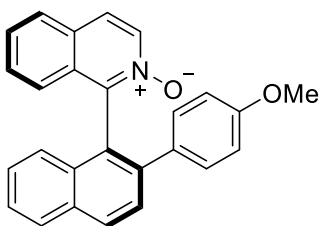

Following the general procedure for arylation, the title compound was isolated from column chromatography (80% EtOAc/*n*-hexane) as brown solid, yield = 17.0 mg (45%). MP = 154-156 °C. <sup>1</sup>H NMR (500 MHz, CDCl<sub>3</sub>,  $\delta$ ): 8.33 (d, *J* = 7.0 Hz, 1H), 8.02 (dd, *J* = 8.5, 1.5 Hz, 1H), 7.90 (d, *J* = 8.0 Hz, 1H), 7.63-7.60 (m, 3H), 7.43-7.40 (m, 1H), 7.36-7.25 (m, 4H), 7.20-7.15 (m, 1H), 7.07 (dd, *J* = 8.5 Hz, 1H), 6.87 (d, *J* = 8.5 Hz, 1H), 6.5-6.56 (m, 2H), 3.58 (s, 3H). <sup>13</sup>C{<sup>1</sup>H} NMR (125 MHz, CDCl<sub>3</sub>,  $\delta$ ): 159.0, 146.5, 140.6, 136.8, 133.3, 132.8, 131.6, 130.3, 129.6, 129.5, 129.3, 129.1, 128.7, 128.6, 128.0, 127.6, 126.9, 126.3, 126.1, 125.3, 125.0, 124.0, 113.7, 55.1. HRMS (ESI TOF) (*m/z*): [*M* + *H*]<sup>+</sup> calcd for C<sub>26</sub>H<sub>20</sub>NO<sub>2</sub><sup>+</sup> 378.1489; found, 378.1488. HPLC separation (Chiralcel<sup>®</sup>-ODH, *n*-hexane/*i*-PrOH 80:20, 0.8 mL/min, detection at 254 nm): = *t<sub>r</sub>* (minor) = 19.4 min, *t<sub>r</sub>* (major) = 26.7 min, 92% *ee*.  $[\alpha]_{\text{D}}^{20} = -75$  (*c* = 0.10, Acetone).

*(S)*-1-(Naphthalen-1-yl)isoquinoline-*N*-oxide (Table 2, Entry **1a**): Solid (12.7 mg, 47% yield,

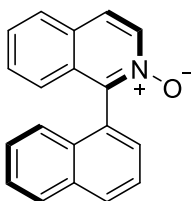

54% *ee*). Analytical data for **1a**:  $[\alpha]_{\text{D}}^{20} = +163$  (*c* = 0.10, Acetone, 54% *ee*). The enantiomeric excess was determined by (Chiralcel<sup>®</sup>-ODH, *n*-hexane/*i*-PrOH 80:20, 0.8 mL/min, detection at 254 nm): = *t<sub>r</sub>* (major) = 21.6 min, *t<sub>r</sub>* (minor) = 26.3 min, 54% *ee*.



(*R*)-1-(2-(*p*-tolyl)naphthalen-1-yl)isoquinoline 2-oxide (Table 2, Entry 3b):

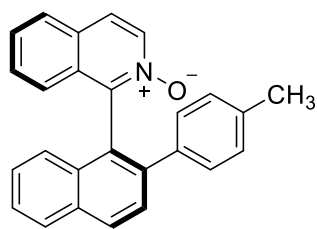

Following the general procedure for arylation, the title compound was isolated from column chromatography (80% EtOAc/*n*-hexane) as brown solid, yield = 17.3 mg (48%). MP = 118-120 °C. <sup>1</sup>H NMR (600 MHz, CDCl<sub>3</sub>, δ): 8.41 (d, *J* = 7.2 Hz, 1H), 8.11 (d, *J* = 8.4 Hz, 1H), 8.00 (d, *J* = 7.8 Hz, 1H), 7.74 (d, *J* = 7.8 Hz, 1H), 7.71-7.69 (m, 2H),

7.51-7.47 (m, 2H), 7.40-7.38 (m, 1H), 7.31-7.28 (m, 1H), 7.20-7.19 (m, 2H), 7.10 (d, *J* = 8.4 Hz, 1H), 7.01 (d, *J* = 8.4 Hz, 1H), 6.90-6.89 (m, 2H), 2.15 (s, 3H). <sup>13</sup>C{<sup>1</sup>H} NMR (150 MHz, CDCl<sub>3</sub>, δ): 146.9, 141.1, 137.6, 137.5, 136.6, 132.9, 131.0, 130.6, 129.9, 129.7, 129.5, 129.4, 129.1, 129.0, 128.9, 128.3, 127.8, 127.5, 127.0, 126.4, 125.8, 125.4, 124.3, 123.4, 21.14. HRMS (ESI TOF) (*m/z*): [M + H]<sup>+</sup> calcd for C<sub>26</sub>H<sub>20</sub>NO<sup>+</sup> 362.1539 found, 362.1549. HPLC separation (Chiralcel<sup>®</sup>-ODH, *n*-hexane/*i*-PrOH 80:20, 0.8 mL/min, detection at 274 nm): = *t<sub>r</sub>* (minor) = 14.6 min, *t<sub>r</sub>* (major) = 17.0 min, 95% *ee*. [α]<sub>D</sub><sup>20</sup> = -93 (c = 0.10, Acetone).

(*S*)-1-(Naphthalen-1-yl)isoquinoline-*N*-oxide (Table 2, Entry 1a): Solid (12.5 mg, 46% yield, 58% *ee*). Analytical data for **1a**: [α]<sub>D</sub><sup>20</sup> = +179 (c = 0.10, Acetone, 58% *ee*).

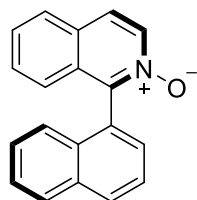

The enantiomeric excess was determined by (Chiralcel<sup>®</sup>-ODH, *n*-hexane/*i*-PrOH 80:20, 0.8 mL/min, detection at 254 nm): = *t<sub>r</sub>* (major) = 20.6 min, *t<sub>r</sub>* (minor) = 26.7 min, 58% *ee*.

(*R*)-1-(2-(4-(*tert*-butyl)phenyl)naphthalen-1-yl)isoquinoline 2-oxide (Table 2, Entry 3c):

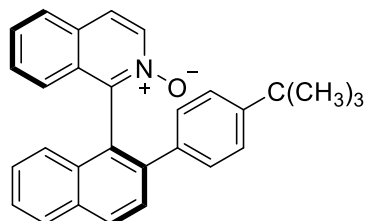

Following the general procedure for arylation, the title compound was isolated from column chromatography (80% EtOAc/*n*-hexane) as brown solid, yield = 19.3 mg (48%). MP = 164-166 °C. <sup>1</sup>H NMR (500 MHz, CDCl<sub>3</sub>, δ): 8.42 (d, *J* = 7.0 Hz, 1H), 8.12 (d, *J* = 8.5 Hz, 1H), 8.01 (d, *J* = 8.5 Hz, 1H), 7.78 (d, *J* = 8.0, 1H), 7.72-7.71 (m, 2H), 7.55-7.49 (m, 2H), 7.40-7.37 (m, 1H), 7.36-7.32 (m, 1H), 7.18-7.16 (m, 2H), 7.12- 7.05

(m, 4H), 1.14 (s, 9H). <sup>13</sup>C{<sup>1</sup>H} NMR (125 MHz, CDCl<sub>3</sub>, δ): 150.9, 147.0, 141.0, 137.0, 136.3, 132.7, 130.6, 130.2, 129.9, 129.6, 129.3, 129.1, 128.1, 127.4, 127.2, 126.9, 126.4, 126.1, 124.9, 124.7, 124.3, 122.7, 34.4, 31.0. HRMS (ESI TOF) (*m/z*): [M + H]<sup>+</sup> calcd for C<sub>29</sub>H<sub>26</sub>NO<sup>+</sup> 404.2009 found, 404.2008. HPLC separation (Chiralcel<sup>®</sup>-ODH, *n*-hexane/*i*-PrOH 80:20, 0.7 mL/min, detection at 310 nm): = *t<sub>r</sub>* (minor) = 12.2 min, *t<sub>r</sub>* (major) = 14.8 min, 89% *ee*. [α]<sub>D</sub><sup>20</sup> = -83 (c = 0.10, Acetone).

(*S*)-1-(Naphthalen-1-yl)isoquinoline-*N*-oxide (Table 2, Entry **1a**): Solid (12.7 mg, 47% yield, 58% *ee*). Analytical data for **1a**:  $[\alpha]_{\text{D}}^{20} = +177$  ( $c = 0.10$ , Acetone, 58% *ee*).

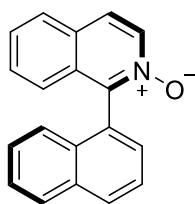

The enantiomeric excess was determined by (Chiralcel<sup>®</sup>-ODH, *n*-hexane/*i*-PrOH 80:20, 0.8 mL/min, detection at 254 nm): =  $t_r$  (major) = 22.3 min,  $t_r$  (minor) = 26.9 min, 58% *ee*.

(*R*)-1-(2-(4-ethoxyphenyl)naphthalen-1-yl)isoquinoline 2-oxide (Table 2, Entry **3d**): Following

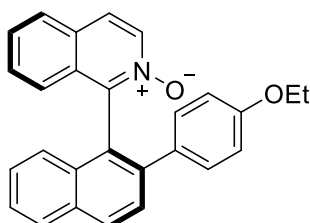

the general procedure for arylation, the title compound was isolated from column chromatography (80% EtOAc/*n*-hexane) as brown solid, yield = 17.2 mg (44%). MP = 168-170 °C. <sup>1</sup>H NMR (500 MHz, CDCl<sub>3</sub>,  $\delta$ ): 8.44 (d,  $J = 7.5$  Hz, 1H), 8.10 (d,  $J = 8.5$  Hz, 1H), 7.99 (d,  $J = 8.5$  Hz, 1H), 7.74 (d,  $J = 8.0$  Hz, 1H), 7.70-7.68 (m, 2H),

7.51-7.47 (m, 2H), 7.41-7.37 (m, 1H), 7.31-7.27 (m, 1H), 7.23-7.20 (m, 2H), 7.09 (dd,  $J = 8.5$ , 1.0 Hz, 1H), 7.00 (dd,  $J = 8.5$ , 1.0 Hz, 1H), 6.62-6.59 (m, 2H), 3.86-3.82 (m, 2H), 1.29 (t,  $J = 7.0$  Hz, 3H). <sup>13</sup>C{<sup>1</sup>H} NMR (125 MHz, CDCl<sub>3</sub>,  $\delta$ ): 159.0, 146.5, 140.6, 136.8, 133.3, 132.8, 131.6, 130.3, 129.6, 129.5, 158.6, 147.2, 140.9, 136.4, 132.7, 132.6, 131.0, 130.5, 130.1, 129.8, 129.6, 129.28, 129.26, 129.1, 128.2, 127.5, 127.0, 126.4, 125.8, 125.2, 124.3, 123.25, 123.21, 114.2, 63.4, 14.8. HRMS (ESI TOF) ( $m/z$ ):  $[M + H]^+$  calcd for C<sub>27</sub>H<sub>22</sub>NO<sub>2</sub><sup>+</sup> 392.1645 found, 392.1645. HPLC separation (Chiralcel<sup>®</sup>-ODH, *n*-hexane/*i*-PrOH 80:20, 0.5 mL/min, detection at 274 nm): =  $t_r$  (minor) = 27.1 min,  $t_r$  (major) = 29.8 min, 92% *ee*.  $[\alpha]_{\text{D}}^{20} = -87$  ( $c = 0.10$ , Acetone).

(*S*)-1-(Naphthalen-1-yl)isoquinoline-*N*-oxide (Table 2, Entry **1a**): Solid (12.2 mg, 45% yield, 43% *ee*). Analytical data for **1a**:  $[\alpha]_{\text{D}}^{20} = +134$  ( $c = 0.10$ , Acetone, 43% *ee*).

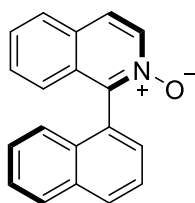

The enantiomeric excess was determined by (Chiralcel<sup>®</sup>-ODH, *n*-hexane/*i*-PrOH 80:20, 0.8 mL/min, detection at 254 nm): =  $t_r$  (major) = 20.4 min,  $t_r$  (minor) = 26.4 min, 43% *ee*.

(*R*)-1-(2-(4-(benzyloxy)phenyl)naphthalen-1-yl)isoquinoline 2-oxide (Table 2, Entry **3e**):

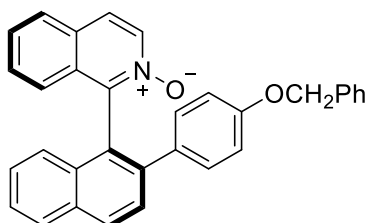

Following the general procedure for arylation, the title compound was isolated from column chromatography (80% EtOAc/*n*-hexane) as brown solid, yield = 22.2 mg (49%). MP = 106-108 °C. <sup>1</sup>H NMR (600 MHz, CDCl<sub>3</sub>,  $\delta$ ): 8.44 (d,  $J = 7.2$  Hz, 1H), 8.11 (d,  $J = 8.4$  Hz, 1H), 8.01 (d,  $J = 8.4$  Hz, 1H), 7.78 (d,  $J = 7.8$  Hz, 1H), 7.73 (d,  $J = 7.2$  Hz, 1H), 7.70 (d,  $J = 8.4$  Hz, 1H), 7.55-7.50 (m, 2H), 7.41 (t,  $J = 7.8$  Hz, 1H), 7.34-7.30 (m, 7H), 7.21-7.20 (m, 2H), 7.09 (d,  $J = 7.8$  Hz, 1H), 7.04 (d,  $J =$

8.4 Hz, 1H), 6.71-6.70 (m, 2H), 4.88 (s, 2H).  $^{13}\text{C}\{^1\text{H}\}$  NMR (150 MHz,  $\text{CDCl}_3$ ,  $\delta$ ): 158.5, 147.3, 140.9, 136.8, 136.4, 132.8, 130.7, 130.4, 130.2, 130.1, 129.8, 129.3, 129.2, 128.8, 128.6, 128.5, 128.3, 128.2, 128.1, 127.8, 127.6, 127.5, 127.1, 126.5, 126.0, 124.8, 124.5, 122.8, 114.7, 69.9. HRMS (ESI TOF) ( $m/z$ ):  $[\text{M} + \text{H}]^+$  calcd for  $\text{C}_{32}\text{H}_{24}\text{NO}_2^+$  454.1802 found, 454.1802. HPLC separation (Chiralcel<sup>®</sup>-ODH, *n*-hexane/*i*-PrOH 80:20, 0.7 mL/min, detection at 310 nm): =  $t_r$  (minor) = 26.3 min,  $t_r$  (major) = 30.0 min, 89% *ee*.  $[\alpha]_{\text{D}}^{20} = -84$  ( $c = 0.10$ , Acetone).

(*S*)-1-(Naphthalen-1-yl)isoquinoline-*N*-oxide (Table 2, Entry **1a**): Solid (11.1 mg, 41% yield,

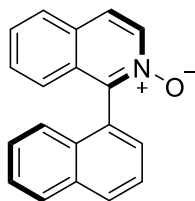

48% *ee*). Analytical data for **1a**:  $[\alpha]_{\text{D}}^{20} = +147$  ( $c = 0.10$ , Acetone, 48% *ee*).

The enantiomeric excess was determined by (Chiralcel<sup>®</sup>-ODH, *n*-hexane/*i*-PrOH 80:20, 0.8 mL/min, detection at 254 nm): =  $t_r$  (major) = 22.2 min,  $t_r$  (minor) = 26.9 min, 48% *ee*.

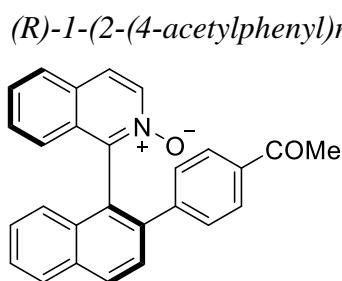

(*R*)-1-(2-(4-acetylphenyl)naphthalen-1-yl)isoquinoline 2-oxide (Table 2, Entry **3f**): Following the general procedure for arylation, the title compound was isolated from column chromatography (80% EtOAc/*n*-hexane) as brown solid, yield = 20.2 mg (52%). MP = 244-246 °C.  $^1\text{H}$  NMR (500 MHz,  $\text{CDCl}_3$ ,  $\delta$ ): 88.36 (d,  $J = 7.0$  Hz, 1H), 8.14 (dd,  $J = 8.5$ , 1.0 Hz, 1H), 8.00 (d,  $J = 7.0$  Hz, 1H), 7.72-7.68 (m, 5H), 7.55-7.52 (m, 1H), 7.50-7.48 (m, 2H), 7.45-7.38 (m, 2H), 7.29-7.25 (m, 1H), 7.16 (dd,  $J = 8.5$ , 1.0 Hz, 1H), 6.94 (d,  $J = 8.5$  Hz 1H), 2.46 (s, 3H).  $^{13}\text{C}\{^1\text{H}\}$  NMR (125 MHz,  $\text{CDCl}_3$ ,  $\delta$ ): 197.98, 145.81, 145.62, 139.75, 136.85, 136.04, 133.31, 131.39, 130.61, 129.64, 129.60, 129.56, 129.09, 129.00, 128.78, 128.56, 128.30, 127.97, 127.93, 127.41, 127.02, 126.91, 126.57, 125.07, 124.91, 124.89, 124.35, 26.63. HRMS (ESI TOF) ( $m/z$ ):  $[\text{M} + \text{H}]^+$  calcd for  $\text{C}_{27}\text{H}_{20}\text{NO}_2^+$  390.1489 found, 390.1489. HPLC separation (Lux<sup>®</sup> 5  $\mu\text{m}$  Amylose-1, *n*-hexane/*i*-PrOH 70:30, 1.0 mL/min, detection at 310 nm): =  $t_r$  (minor) = 16.1 min,  $t_r$  (major) = 29.2 min, 75% *ee*.  $[\alpha]_{\text{D}}^{20} = -51$  ( $c = 0.10$ , Acetone).

(*S*)-1-(Naphthalen-1-yl)isoquinoline-*N*-oxide (Table 2, Entry **1a**): Solid (16.0 mg, 59% yield,

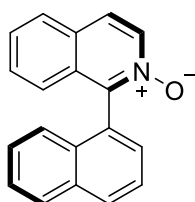

7% *ee*). Analytical data for **1a**:  $[\alpha]_{\text{D}}^{20} = +15$  ( $c = 0.10$ , Acetone, 7% *ee*). The enantiomeric excess was determined by (Chiralcel<sup>®</sup>-ODH, *n*-hexane/*i*-PrOH 80:20, 0.8 mL/min, detection at 254 nm): =  $t_r$  (major) = 22.0 min,  $t_r$  (minor) = 26.3 min, 7% *ee*.

(*R*)-1-(2-(4-nitrophenyl)naphthalen-1-yl)isoquinoline 2-oxide (Table 2, Entry 3g):

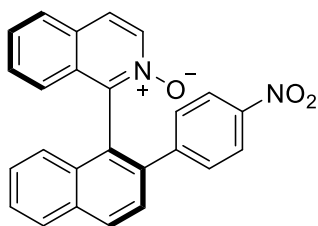

the general procedure for arylation, the title compound was isolated from column chromatography (80% EtOAc/*n*-hexane) as brown solid, yield = 23.1 mg (23%). MP = 122-124 °C. <sup>1</sup>H NMR (500 MHz, CDCl<sub>3</sub>, δ): 8.47 (d, *J* = 7.0 Hz, 1H), 8.21 (d, *J* = 8.0 Hz, 1H), 8.09 (d, *J* = 8.5 Hz, 1H), 7.94-7.90 (m, 2H), 7.83-7.80 (m, 2H), 7.70 (d, *J* = 8.5 Hz, 1H), 7.63-7.57 (m, 2H), 7.50-7.47 (m, 1H), 7.45-7.2 (m, 2H), 7.39-7.36 (m, 1H), 7.14 (d, *J* = 8.5 Hz, 1H), 7.00 (d, *J* = 8.5 Hz, 1H). <sup>13</sup>C{<sup>1</sup>H} NMR (125 MHz, CDCl<sub>3</sub>, δ): 147.4, 146.5, 146.2, 139.3, 136.3, 133.5, 131.3, 130.7, 130.6, 130.3, 130.1, 129.6, 129.2, 129.0, 128.5, 127.6, 127.6, 127.5, 127.4, 125.4, 125.2, 125.1, 123.6, 122.0. HRMS (ESI TOF) (*m/z*): [M + H]<sup>+</sup> calcd for C<sub>25</sub>H<sub>17</sub>N<sub>2</sub>O<sub>3</sub><sup>+</sup> 393.1234; found, 393.1235. HPLC separation (Lux<sup>®</sup> 5 μm Amylose-1, *n*-hexane/*i*-PrOH 60:40, 1.0 mL/min, detection at 310 nm): = *t<sub>r</sub>* (major) = 11.2 min, *t<sub>r</sub>* (minor) = 20.2 min, 59% *ee*. [α]<sub>D</sub><sup>20</sup> = -21 (c = 0.10, Acetone).

(*S*)-1-(Naphthalen-1-yl)isoquinoline-*N*-oxide (Table 2, Entry 1a): Solid (11.4 mg, 42% yield, 34% *ee*). Analytical data for 1a: [α]<sub>D</sub><sup>20</sup> = +117 (c = 0.10, Acetone, 34% *ee*).

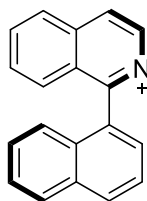

The enantiomeric excess was determined by (Chiralcel<sup>®</sup>-ODH, *n*-hexane/*i*-PrOH 80:20, 0.8 mL/min, detection at 254 nm): = *t<sub>r</sub>* (major) = 23.4 min, *t<sub>r</sub>* (minor) = 28.0 min, 34% *ee*.

(*R*)-1-(2-(4-(trifluoromethyl)phenyl)naphthalen-1-yl)isoquinoline 2-oxide (Table 2, Entry 3h):

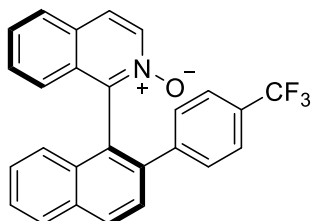

Following the general procedure for arylation, the title compound was isolated from column chromatography (80% EtOAc/*n*-hexane) as brown solid, yield = 19.5 mg (47%). MP = 130-132 °C. <sup>1</sup>H NMR (500 MHz, CDCl<sub>3</sub>, δ): 8.45 (d, *J* = 7.5 Hz, 1H), 8.18 (d, *J* = 8.5 Hz, 1H), 8.08-8.06 (m, 1H), 7.80 (dd, *J* = 8.5, 1.0 Hz, 1H), 7.77 (d, *J* = 7.0 Hz, 1H), 7.69 (d, *J* = 8.5 Hz, 1H), 7.60-7.54 (m, 2H), 7.48-7.45 (m, 1H), 7.40-7.32 (m, 5H), 7.12 (d, *J* = 8.5 Hz, 1H), 7.01 (d, *J* = 8.5 Hz, 1H). <sup>13</sup>C{<sup>1</sup>H} NMR (125 MHz, CDCl<sub>3</sub>, δ): 146.5, 143.5, 140.1, 136.3, 133.3, 131.1, 130.5, 130.4, 130.2, 130.1, 130.0, 129.8, 129.5, 129.1, 128.5, 128.3, 127.9, 127.4, 127.1, 125.6, 125.33 (q, *J* = 3.75 Hz), 125.0, 124.9, 124.0 (q, *J* = 276.25 Hz), 122.1. HRMS (ESI TOF) (*m/z*): [M + H]<sup>+</sup> calcd for C<sub>26</sub>H<sub>17</sub>F<sub>3</sub>NO<sup>+</sup> 416.1257 found, 416.1257. HPLC separation (Chiralcel<sup>®</sup>-ODH, *n*-hexane/*i*-PrOH 92:8, 0.6 mL/min, detection at 310 nm): = *t<sub>r</sub>* (minor) = 47.4 min, *t<sub>r</sub>* (major) = 53.1 min, 83% *ee*. [α]<sub>D</sub><sup>20</sup> = -42 (c = 0.10, Acetone).

(*S*)-1-(Naphthalen-1-yl)isoquinoline-*N*-oxide (Table 2, Entry **1a**): Solid (19.8 mg, 73% yield,

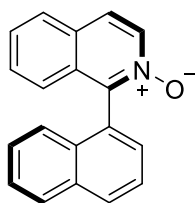

12% *ee*). Analytical data for **1a**:  $[\alpha]_D^{20} = +53$  ( $c = 0.10$ , Acetone, 12% *ee*).

The enantiomeric excess was determined by (Chiralcel<sup>®</sup>-ODH, *n*-hexane/*i*-PrOH 80:20, 0.8 mL/min, detection at 254 nm): =  $t_r$ (major) = 28.6 min,  $t_r$ (minor) = 28.6 min, 12% *ee*.

(*R*)-1-(2-(4-acetoxyphenyl)naphthalen-1-yl)isoquinoline 2-oxide (Table 2, Entry **3i**):

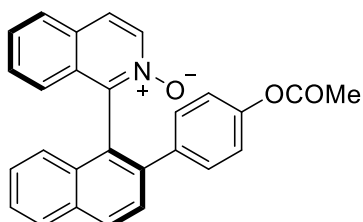

Following the general procedure for arylation, the title compound was isolated from column chromatography (80% EtOAc/*n*-hexane) as brown solid, yield = 8.5 mg (21%). MP = 126-128 °C. <sup>1</sup>H NMR (500 MHz, CDCl<sub>3</sub>,  $\delta$ ): 8.36 (d,  $J = 6.5$  Hz, 1H), 8.06 (d,  $J = 8.5$  Hz, 1H), 7.95 (d,  $J = 8.0$  Hz, 1H), 7.72-7.70

(m, 1H), 7.67 (d,  $J = 7.0$  Hz, 1H), 7.62 (d,  $J = 8.5$  Hz, 1H), 7.48-7.45 (m, 2H), 7.36-7.33 (m, 1H), 7.28-7.25 (m, 1H), 7.22-7.1- (m, 2H), 7.02 (d,  $J = 8.5$  Hz, 1H), 6.97-6.95 (m, 1H), 6.77-6.74 (m, 2H), 2.12 (s, 3H). <sup>13</sup>C{<sup>1</sup>H} NMR (125 MHz, CDCl<sub>3</sub>,  $\delta$ ): 169.3, 150.3, 147.0, 140.4, 137.8, 136.2, 133.0, 130.9, 130.7, 130.4, 129.9, 129.3, 129.25, 129.20, 128.1, 127.7, 127.2, 126.7, 125.91, 125.90, 125.15, 124.67, 124.64, 122.8, 121.4, 21.2. HRMS (ESI TOF) ( $m/z$ ):  $[M + H]^+$  calcd for C<sub>27</sub>H<sub>20</sub>NO<sub>3</sub><sup>+</sup> 406.1438 found, 406.1439. HPLC separation (Chiralcel<sup>®</sup>-ODH, *n*-hexane/*i*-PrOH 90:10, 1.0 mL/min, detection at 254 nm): =  $t_r$ (minor) = 47.1 min,  $t_r$ (major) = 58.4 min, 45% *ee*.  $[\alpha]_D^{20} = -32$  ( $c = 0.10$ , Acetone).

(*S*)-1-(Naphthalen-1-yl)isoquinoline-*N*-oxide (Table 2, Entry **1a**): Solid (11.9 mg, 44% yield,

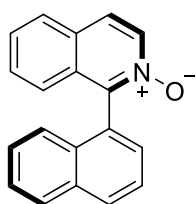

35% *ee*). Analytical data for **1a**:  $[\alpha]_D^{20} = +115$  ( $c = 0.10$ , Acetone, 35% *ee*).

The enantiomeric excess was determined by (Chiralcel<sup>®</sup>-ODH, *n*-hexane/*i*-PrOH 80:20, 0.8 mL/min, detection at 254 nm): =  $t_r$ (major) = 22.4 min,  $t_r$ (minor) = 27.4 min, 35% *ee*.

(*R*)-1-(2-(*m*-tolyl)naphthalen-1-yl)isoquinoline 2-oxide (Table 2, Entry **3j**): Following the

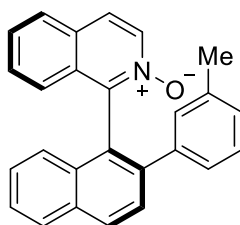

general procedure for arylation, the title compound was isolated from column chromatography (80% EtOAc/*n*-hexane) as brown solid, yield = 17.7 mg (49%). MP = 118-120 °C. <sup>1</sup>H NMR (500 MHz, CDCl<sub>3</sub>,  $\delta$ ): 8.46 (d,  $J = 7.5$  Hz, 1H), 8.14 (d,  $J = 8.5$  Hz, 1H), 8.04 (d,  $J = 8.0$  Hz, 1H), 7.78 (d,  $J = 8.5$  Hz, 1H), 7.74-7.72 (m, 2H), 7.56-7.53 (m, 2H), 7.45-7.41

(m, 1H), 7.36-7.33 (m, 1H), 7.11-7.03 (m, 4H), 6.99-6.960 (m, 1H), 6.89-6.87 (m, 1H), 2.08 (s, 3H). <sup>13</sup>C{<sup>1</sup>H} NMR (125 MHz, CDCl<sub>3</sub>,  $\delta$ ): 147.30, 141.37, 139.99, 138.22, 138.18, 136.23, 132.93, 130.79, 130.59, 130.56, 130.49, 130.33, 129.76, 129.49, 129.29, 128.70, 128.65,

128.62, 128.28, 127.89, 127.50, 127.11, 126.65, 126.60, 126.17, 124.74, 124.67, 124.52, 122.03, 21.23. HRMS (ESI TOF) (m/z): [M + H]<sup>+</sup> calcd for C<sub>26</sub>H<sub>20</sub>NO<sup>+</sup> 362.1539; found, 362.1539. HPLC separation (Chiralcel<sup>®</sup>-ODH, *n*-hexane/*i*-PrOH 80:20, 0.8 mL/min, detection at 254 nm): = *t<sub>r</sub>* (minor) = 13.5 min, *t<sub>r</sub>* (major) = 16.7 min, 93% *ee*. [α]<sub>D</sub><sup>20</sup> = -73 (c = 0.10, Acetone).

(*S*)-1-(Naphthalen-1-yl)isoquinoline-*N*-oxide (Table 2, Entry **1a**): Solid (13.3 mg, 49% yield,

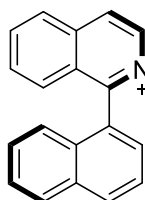

33% *ee*). Analytical data for **1a**: [α]<sub>D</sub><sup>20</sup> = + 114 (c = 0.10, Acetone, 33% *ee*).

The enantiomeric excess was determined by (Chiralcel<sup>®</sup>-ODH, *n*-hexane/*i*-PrOH 80:20, 0.8 mL/min, detection at 254 nm): = *t<sub>r</sub>* (major) = 22.3 min, *t<sub>r</sub>* (minor) = 27.3 min, 33% *ee*.

(*R*)-1-(2-(3-methoxyphenyl)naphthalen-1-yl)isoquinoline 2-oxide (Table 2, Entry **3k**):

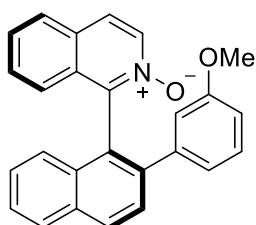

Following the general procedure for arylation, the title compound was isolated from column chromatography (80% EtOAc/*n*-hexane) as brown solid, yield = 16.2 mg (43%). MP = 104-106 °C. <sup>1</sup>H NMR (500 MHz, CDCl<sub>3</sub>, δ): 8.48 (d, *J* = 7.0 Hz, 1H), 8.17 (d, *J* = 8.5 Hz, 1H), 8.05 (d, *J* = 8.0 Hz, 1H), 7.85-7.81 (m, 2H), 7.74 (d, *J* = 8.5 Hz, 1H), 7.62-7.59 (m, 1H), 7.58-7.55 (m, 1H), 7.44-7.38 (m, 2H), 7.14 (d, *J* = 8.0 Hz, 1H), 7.09-7.03 (m, 2H), 6.91-6.89 (m, 1H), 6.80

(d, *J* = 2.5 Hz, 1H), 6.65-6.6 (m, 1H), 3.53 (s, 3H). <sup>13</sup>C{<sup>1</sup>H} NMR (125 MHz, CDCl<sub>3</sub>, δ): 159.6, 141.5, 141.1, 136.0, 133.0, 131.0, 130.8, 130.6, 130.1, 129.4, 129.3, 129.2, 128.2, 127.9, 127.2, 126.8, 126.4, 124.7, 124.6, 123.0, 119.9, 114.3, 113.0, 55.2. HRMS (ESI TOF) (m/z): [M + H]<sup>+</sup> calcd for C<sub>26</sub>H<sub>20</sub>NO<sub>2</sub><sup>+</sup> 378.1489; found, 378.1489. HPLC separation (Chiralcel<sup>®</sup>-ODH, *n*-hexane/*i*-PrOH 80:20, 0.8 mL/min, detection at 254 nm): = *t<sub>r</sub>* (minor) = 17.4 min, *t<sub>r</sub>* (major) = 22.3 min, 91% *ee*. [α]<sub>D</sub><sup>20</sup> = -64 (c = 0.10, Acetone).

(*S*)-1-(Naphthalen-1-yl)isoquinoline-*N*-oxide (Table 2, Entry **1a**): Solid (14.1 mg, 52% yield,

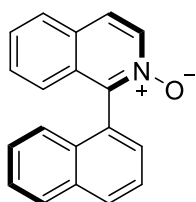

24% *ee*). Analytical data for **1a**: [α]<sub>D</sub><sup>20</sup> = + 100 (c = 0.10, Acetone, 24% *ee*).

The enantiomeric excess was determined by (Chiralcel<sup>®</sup>-ODH, *n*-hexane/*i*-PrOH 80:20, 0.8 mL/min, detection at 254 nm): = *t<sub>r</sub>* (major) = 20.8 min, *t<sub>r</sub>* (minor) = 26.8 min, 24% *ee*.

(*R*)-1-(2-(3-methoxyphenyl)naphthalen-1-yl)isoquinoline 2-oxide (Table 2, Entry 3l):

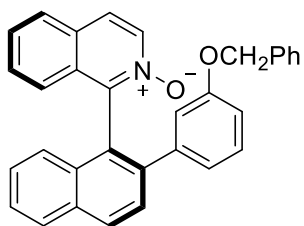

Following the general procedure for arylation, the title compound was isolated from column chromatography (80% EtOAc/*n*-hexane) as brown solid, yield = 18.6 mg (41%). MP = 98-100 °C. <sup>1</sup>H NMR (600 MHz, CDCl<sub>3</sub>, δ): 8.35 (d, *J* = 7.2 Hz, 1H), 8.10 (d, *J* = 8.4 Hz, 1H), 7.97 (d, *J* = 8.4 Hz, 1H), 7.73-7.68 (m, 3H), 7.51-7.48 (m, 1H), 7.46-7.43 (m, 1H), 7.38-7.30 (m, 6H), 7.28-7.25 (m, 1H), 7.15 (d, *J* = 8.4 Hz, 1H), 7.08 (s, 1H), 7.03-7.00 (m, 2H), 6.98 (d, *J* = 8.4 Hz, 1H), 6.70-6.68 (m, 1H), 4.88-4.83 (m, 2H). <sup>13</sup>C{<sup>1</sup>H} NMR (150 MHz, CDCl<sub>3</sub>, δ): 158.5, 146.6, 142.2, 140.7, 137.0, 136.7, 133.1, 131.5, 130.4, 129.8, 129.4, 129.3, 129.2, 128.9, 128.6, 128.01, 127.82, 127.76, 127.70, 127.6, 127.5, 126.9, 126.5, 126.2, 125.5, 125.2, 124.1, 121.1, 114.8, 114.1, 69.9. HRMS (ESI TOF) (*m/z*): [M + H]<sup>+</sup> calcd for C<sub>32</sub>H<sub>24</sub>NO<sub>2</sub><sup>+</sup> 454.1804; found, 454.1804. HPLC separation (Chiralcel<sup>®</sup>-ODH, *n*-hexane/*i*-PrOH 80:20, 1.0 mL/min, detection at 310 nm): = *t<sub>r</sub>*(minor) = 14.6 min, *t<sub>r</sub>*(major) = 25.5 min, 89% *ee*. [α]<sub>D</sub><sup>20</sup> = -83 (c = 0.10, Acetone).

(*S*)-1-(Naphthalen-1-yl)isoquinoline-*N*-oxide (Table 2, Entry 1a): Solid (12.7 mg, 47% yield,

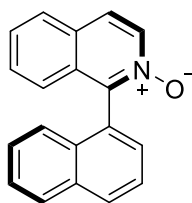

50% *ee*). Analytical data for **1a**: [α]<sub>D</sub><sup>20</sup> = +150 (c = 0.10, Acetone, 50% *ee*).

The enantiomeric excess was determined by (Chiralcel<sup>®</sup>-ODH, *n*-hexane/*i*-PrOH 80:20, 0.8 mL/min, detection at 254 nm): = *t<sub>r</sub>*(major) = 22.8 min, *t<sub>r</sub>*(minor) = 28.0 min, 50% *ee*.

(*R*)-1-(2-(3,5-dimethylphenyl)naphthalen-1-yl)isoquinoline 2-oxide (Table 2, Entry 3m):

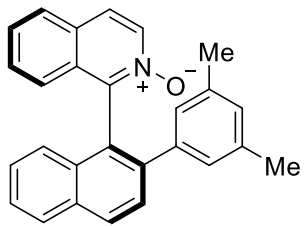

Following the general procedure for arylation, the title compound was isolated from column chromatography (80% EtOAc/*n*-hexane) as brown solid, yield = 17.6 mg (47%). MP = 104-106 °C. <sup>1</sup>H NMR (500 MHz, CDCl<sub>3</sub>, δ): 8.46 (d, *J* = 7.0 Hz, 1H), 8.12 (d, *J* = 9.0 Hz, 1H), 8.01 (d, *J* = 8.5 Hz, 1H), 7.76 (d, *J* = 8.0 Hz, 1H), 7.73 (d, *J* = 7.5 Hz, 2H), 7.53-7.50 (m, 2H), 7.43-7.40 (m, 1H), 7.34-7.31 (m, 1H), 7.11 (d, *J* = 8.0 Hz, 1H), 7.05 (d, *J* = 8.5 Hz, 1H), 6.88 (s, 2H), 6.69 (s, 1H), 2.06 (s, 6H). <sup>13</sup>C{<sup>1</sup>H} NMR (125 MHz, CDCl<sub>3</sub>, δ): 147.2, 141.2, 139.9, 137.8, 136.1, 132.8, 130.6, 130.5, 130.1, 129.9, 129.5, 129.2, 128.1, 127.4, 126.9, 126.4, 125.9, 125.6, 124.8, 124.2, 122.3, 21.0. HRMS (ESI TOF) (*m/z*): [M + H]<sup>+</sup> calcd for C<sub>27</sub>H<sub>22</sub>NO<sup>+</sup> 376.1696; found, 376.1698. HPLC separation (Chiralcel<sup>®</sup>-ODH, *n*-hexane/*i*-PrOH 80:20, 0.8 mL/min, detection at 310 nm): = *t<sub>r</sub>*(minor) = 11.5 min, *t<sub>r</sub>*(major) = 17.5 min, 88% *ee*. [α]<sub>D</sub><sup>20</sup> = -61 (c = 0.10, Acetone).

(*S*)-1-(Naphthalen-1-yl)isoquinoline-*N*-oxide (Table 2, Entry **1a**): Solid (mg, 50% yield, 21% *ee*). Analytical data for **1a**:  $[\alpha]_D^{20} = +71$  ( $c = 0.10$ , Acetone, 21% *ee*). The enantiomeric excess was determined by (Chiralcel<sup>®</sup>-ODH, *n*-hexane/*i*-PrOH 80:20, 0.8 mL/min, detection at 254 nm): =  $t_r$  (major) = 22.5 min,  $t_r$  (minor) = 26.9 min, 21% *ee*.

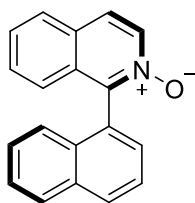

(*R*)-1-(2-(3-(trifluoromethyl)phenyl)naphthalen-1-yl)isoquinoline 2-oxide (Table 2, Entry **3n**):

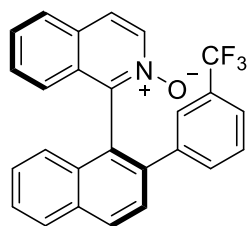

Following the general procedure for arylation, the title compound was isolated from column chromatography (80% EtOAc/*n*-hexane) as brown solid, yield = 15.3 mg (37%). MP = 112-114 °C. <sup>1</sup>H NMR (500 MHz, CDCl<sub>3</sub>,  $\delta$ ): 8.47 (d,  $J = 7.0$  Hz, 1H), 8.22 (d,  $J = 8.5$  Hz, 1H), 8.10 (d,  $J = 8.0$  Hz, 1H), 7.82-7.78 (m, 2H), 7.76 (d,  $J = 8.5$  Hz, 1H), 7.63-7.57 (m, 2H), 7.451-7.47 (m, 2H), 7.42 (s, 1H), 7.40-7.36 (m, 1H), 7.32 (d,  $J = 7.5$  Hz, 1H), 7.23-7.20 (m, 1H), 7.17 (d,  $J = 8.5$  Hz, 1H), 7.03 (d,  $J = 8.5$  Hz, 1H). <sup>13</sup>C{<sup>1</sup>H} NMR (125 MHz, CDCl<sub>3</sub>,  $\delta$ ): 146.5, 140.3, 139.9, 136.0, 133.1, 131.3, 131.1, 130.6, 130.5, 130.1, 129.9, 129.5, 128.9, 128.8, 128.2, 127.9, 127.2, 127.0, 125.5, 124.9, 124.8, 124.53, 122.5, 121.6, 120.6, 119.4 (q,  $J = 287.5$  Hz). HRMS (ESI TOF) ( $m/z$ ):  $[M + H]^+$  calcd for C<sub>26</sub>H<sub>17</sub>F<sub>3</sub>NO<sup>+</sup> 416.1257; found, 416.1259. HPLC separation (Chiralcel<sup>®</sup>-ODH, *n*-hexane/*i*-PrOH 80:20, 1.0 mL/min, detection at 254 nm): =  $t_r$  (minor) = 9.2 min,  $t_r$  (major) = 12.9 min, 77% *ee*.  $[\alpha]_D^{20} = -20$  ( $c = 0.10$ , Acetone).

(*S*)-1-(Naphthalen-1-yl)isoquinoline-*N*-oxide (Table 2, Entry **1a**): Solid (16.0 mg, 59% yield, 3% *ee*). Analytical data for **1a**:  $[\alpha]_D^{20} = +4$  ( $c = 0.10$ , Acetone, 3% *ee*). The enantiomeric excess was determined by (Chiralcel<sup>®</sup>-ODH, *n*-hexane/*i*-PrOH 80:20, 0.8 mL/min, detection at 254 nm): =  $t_r$  (major) = 22.0 min,  $t_r$  (minor) = 26.4 min, 3% *ee*.

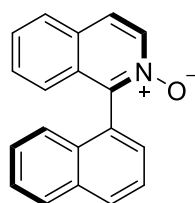

(*R*)-1-(2-(3,5-bis(trifluoromethyl)phenyl)naphthalen-1-yl)isoquinoline 2-oxide (Table 2, Entry **3o**):

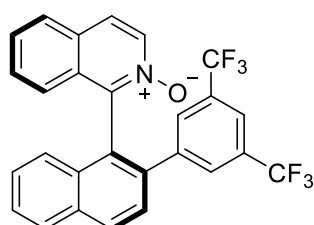

Following the general procedure for arylation, the title compound was isolated from column chromatography (80% EtOAc/*n*-hexane) as brown solid, yield = 17.4 mg (36%). MP = 78-80 °C. <sup>1</sup>H NMR (500 MHz, CDCl<sub>3</sub>,  $\delta$ ): 8.48 (d,  $J = 7.0$  Hz, 1H), 8.21 (d,  $J = 8.5$  Hz, 1H), 8.04 (d,  $J = 8.0$  Hz, 1H), 7.83-7.80 (m, 4H), 7.70 (d,  $J = 8.5$  Hz, 1H), 7.61-7.56 (m, 3H), 7.45-7.42 (m, 1H), 7.40-7.37 (m, 1H), 7.19 (d,  $J = 8.5$  Hz, 1H), 7.02 (d,  $J = 8.5$  Hz, 1H). <sup>13</sup>C{<sup>1</sup>H} NMR (125 MHz, CDCl<sub>3</sub>,  $\delta$ ): 146.6, 142.5, 137.6, 136.2, 133.4, 131.7, 131.5, 131.4, 131.3, 130.4, 130.3, 130.2, 129.4, 128.7, 128.65, 128.62,



128.3, 127.5, 127.3, 126.7, 125.4, 125.3, 124.8, 123.09 (q,  $J = 271.25$  Hz), 121.3 (q,  $J = 4.17$  Hz). HRMS (ESI TOF) .32(m/z):  $[M + H]^+$  calcd for  $C_{27}H_{16}F_6NO^+$  484.1131; found, 484.1131. HPLC separation (Chiralcel<sup>®</sup>-ODH, *n*-hexane/*i*-PrOH 90:10, 1.0 mL/min, detection at 254 nm): =  $t_r$  (minor) = 10.8 min,  $t_r$  (major) = 30.4 min, 37% *ee*.  $[\alpha]_D^{20} = -11$  (c = 0.10, Acetone).

(*S*)-1-(Naphthalen-1-yl)isoquinoline-*N*-oxide (Table 2, Entry **1a**): Solid (11.6 mg, 43% yield, 50% *ee*). Analytical data for **1a**:  $[\alpha]_D^{20} = +149$  (c = 0.10, Acetone, 50% *ee*).

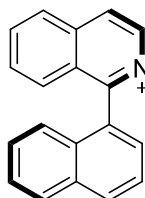

The enantiomeric excess was determined by (Chiralcel<sup>®</sup>-ODH, *n*-hexane/*i*-PrOH 80:20, 0.8 mL/min, detection at 254 nm): =  $t_r$  (major) = 22.2 min,  $t_r$  (minor) = 27.1 min, 50% *ee*.

(*R*)-1-(2-(9*H*-fluoren-3-yl)naphthalen-1-yl)isoquinoline 2-oxide (Table 2, Entry **3p**):

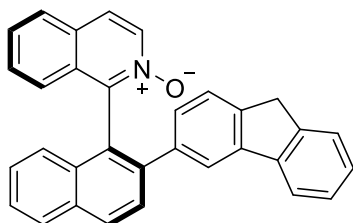

Following the general procedure for arylation, the title compound was isolated from column chromatography (80% EtOAc/*n*-hexane) as brown solid, yield = 21.4 mg (49%). MP = 118-120 °C. <sup>1</sup>H NMR (600 MHz, CDCl<sub>3</sub>,  $\delta$ ): 8.40 (d,  $J = 7.2$  Hz, 1H), 8.13 (d,  $J = 9.0$  Hz, 1H), 8.00 (d,  $J = 7.8$  Hz, 1H), 7.78 (d,  $J = 8.4$  Hz, 1H), 7.65-7.59 (m, 4H), 7.53-7.50 (m, 2H), 7.45 (d,  $J = 7.8$  Hz, 1H), 7.43-7.39 (m, 2H), 7.37-7.34 (m, 1H), 7.30-7.28 (m, 1H), 7.25-7.22 (m, 2H), 7.19 (d,  $J = 8.4$  Hz, 1H), 6.97 (d,  $J = 8.4$  Hz, 1H), 3.74-3.66 (m, 2H). <sup>13</sup>C{<sup>1</sup>H} NMR (150 MHz, CDCl<sub>3</sub>,  $\delta$ ): 146.5, 143.5, 143.3, 141.3, 141.2, 141.0, 139.5, 136.8, 133.0, 131.6, 130.3, 129.6, 129.2, 129.0, 128.7, 128.6, 128.1, 127.7, 127.3, 127.2, 127.0, 126.8, 126.5, 126.4, 125.3, 125.2, 125.1, 125.0, 124.9, 124.0, 119.9, 119.6, 36.9. HRMS (ESI TOF) (m/z):  $[M + H]^+$  calcd for  $C_{32}H_{22}NO^+$  436.1696 found, 436.1696. HPLC separation (Chiralcel<sup>®</sup>-ODH, *n*-hexane/*i*-PrOH 80:20, 0.8 mL/min, detection at 310 nm): =  $t_r$  (minor) = 18.6 min,  $t_r$  (major) = 26.9 min, 88% *ee*.  $[\alpha]_D^{20} = -110$  (c = 0.10, Acetone).

(*S*)-1-(*o*-tolyl)isoquinoline 2-oxide (Table 2, Entry **1b**): Solid (11.0 mg, 47% yield, 35% *ee*).

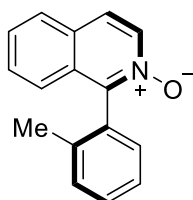

Analytical data for **1b**:  $[\alpha]_D^{20} = +36$  (c = 0.10, Acetone, 35% *ee*). The enantiomeric excess was determined by (Chiralcel<sup>®</sup>-ODH, *n*-hexane/*i*-PrOH 92:8, 1.0 mL/min, detection at 254 nm): =  $t_r$  (major) = 36.5 min,  $t_r$  (minor) = 42.6 min, 35% *ee*.

(*R*)-1-(4'-methoxy-3-methyl-[1,1'-biphenyl]-2-yl)isoquinoline 2-oxide (Table 2, Entry 3q):

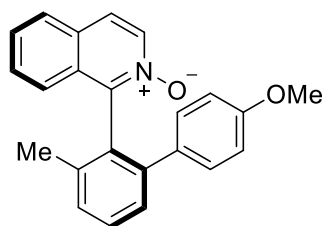

Following the general procedure for arylation, the title compound was isolated from column chromatography (80% EtOAc/*n*-hexane) as brown solid, yield = 16.4 mg (48%). MP = 106-108 °C. <sup>1</sup>H NMR (500 MHz, CDCl<sub>3</sub>, δ): 8.41 (d, *J* = 7.0 Hz, 1H), 7.69 (d, *J* = 8.0 Hz, 1H), 7.60 (d, *J* = 7.0 Hz, 1H), 7.54-7.47 (m, 2H), 7.39-7.36 (m, 3H), 7.16-7.13 (m, 2H), 7.09 (d, *J* = 8.5 Hz, 1H), 6.56-6.55 (m, 2H), 3.60 (s, 3H), 2.03 (s, 3H). <sup>13</sup>C{<sup>1</sup>H} NMR (125 MHz, CDCl<sub>3</sub>, δ): 158.9, 148.1, 142.5, 138.1, 136.2, 133.0, 133.0, 129.98, 129.94, 129.6, 129.4, 129.1, 129.0, 128.8, 128.7, 127.7, 126.9, 125.6, 123.9, 113.5, 55.1, 19.5. HRMS (ESI TOF) (*m/z*): [M + H]<sup>+</sup> calcd for C<sub>23</sub>H<sub>20</sub>NO<sub>2</sub><sup>+</sup> 342.1489 found, 342.1491. HPLC separation (Chiralcel<sup>®</sup>-ODH, *n*-hexane/*i*-PrOH 85:15, 1.0 mL/min, detection at 254 nm): = *t<sub>r</sub>* (minor) = 14.4 min, *t<sub>r</sub>* (major) = 19.1 min, 84% *ee*. [α]<sub>D</sub><sup>20</sup> = -23 (c = 0.10, Acetone).

(*S*)-1-(2-ethylphenyl)isoquinoline 2-oxide (Table 2, Entry 1c): Solid (10.4 mg, 42% yield, 23%

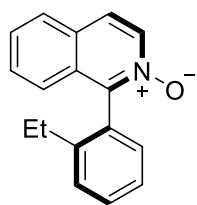

*ee*). Analytical data for **1c**: [α]<sub>D</sub><sup>20</sup> = +31 (c = 0.10, Acetone, 23% *ee*). The enantiomeric excess was determined by (Chiralcel<sup>®</sup>-ODH, *n*-hexane/*i*-PrOH 85:15, 0.6 mL/min, detection at 254 nm): = *t<sub>r</sub>* (major) = 21.9 min, *t<sub>r</sub>* (minor) = 25.1 min, 23% *ee*.

(*R*)-1-(3-ethyl-4'-methoxy-[1,1'-biphenyl]-2-yl)isoquinoline 2-oxide (Table 2, Entry 3r):

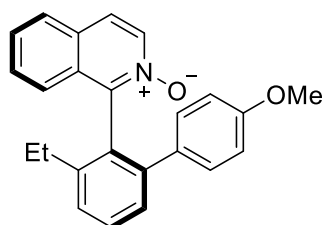

Following the general procedure for arylation, the title compound was isolated from column chromatography (80% EtOAc/*n*-hexane) as brown solid, yield = 17.0 mg (48%). MP = 98-100 °C. <sup>1</sup>H NMR (500 MHz, CDCl<sub>3</sub>, δ): 8.37 (d, *J* = 7.0 Hz, 1H), 7.69 (dd, *J* = 8.0, 1.0 Hz, 1H), 7.61-7.57 (m, 2H), 7.49-7.45 (m, 2H), 7.39-7.3 (m, 2H), 7.15-7.13 (m, 1H), 7.10 (d, *J* = 8.5 Hz, 1H), 6.60-6.51 (m, 2H), 3.61 (s, 3H), 2.54-2.46 (m, 1H), 2.22-2.15 (m, 1H), 1.00 (t, *J* = 7.5 Hz, 3H). <sup>13</sup>C{<sup>1</sup>H} NMR (125 MHz, CDCl<sub>3</sub>, δ): 158.9, 143.7, 142.6, 136.2, 133.1, 130.2, 129.5, 129.3, 129.2, 129.1, 127.9, 127.2, 126.9, 125.7, 123.9, 113.5, 55.1, 26.1, 14.2. HRMS (ESI TOF) (*m/z*): [M + H]<sup>+</sup> calcd for C<sub>24</sub>H<sub>22</sub>NO<sub>2</sub><sup>+</sup> 356.1645 found, 356.1645. HPLC separation (Chiralcel<sup>®</sup>-ODH, *n*-hexane/*i*-PrOH 80:20, 1.0 mL/min, detection at 254 nm): = *t<sub>r</sub>* (minor) = 9.1 min, *t<sub>r</sub>* (major) = 12.2 min, 87% *ee*. [α]<sub>D</sub><sup>20</sup> = -21 (c = 0.10, Acetone).

(*S*)-1-(2-chlorophenyl)isoquinoline 2-oxide (Table 2, Entry **1d**): Solid (14.3 mg, 56% yield,

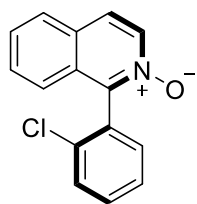

10% *ee*). Analytical data for **1d**:  $[\alpha]_D^{20} = +17$  ( $c = 0.10$ , Acetone, 10% *ee*).

The enantiomeric excess was determined by (Chiralcel<sup>®</sup>-ODH, *n*-hexane/*i*-PrOH 80:20, 0.8 mL/min, detection at 274 nm): =  $t_r$ (major) = 17.7 min,  $t_r$ (minor) = 23.5 min, 10% *ee*.

(*R*)-1-(3-chloro-4'-methoxy-[1,1'-biphenyl]-2-yl)isoquinoline 2-oxide (Table 3, Entry **3s**):

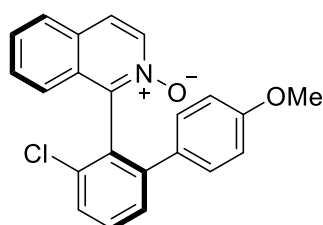

Following the general procedure for arylation, the title compound was isolated from column chromatography (80% EtOAc/*n*-hexane) as brown solid, yield = 11.9 mg (33%). MP = 122-124 °C. <sup>1</sup>H NMR (500 MHz, CDCl<sub>3</sub>,  $\delta$ ): 8.31 (d,  $J = 7.5$  Hz, 1H), 7.71 (d,  $J = 8.0$  Hz, 1H), 7.63 (d,  $J = 7.5$  Hz, 1H), 7.58-7.53 (m, 2H), 7.50-7.46 (m, 1H),

7.45 (dd,  $J = 7.0, 2.0$  Hz, 1H), 7.42-7.39 (m, 1H), 7.21-7.18 (m, 2H), 7.09 (d,  $J = 8.5$  Hz, 1H), 3.63 (s, 3H). <sup>13</sup>C{<sup>1</sup>H} NMR (125 MHz, CDCl<sub>3</sub>,  $\delta$ ): 13C 159.3, 145.5, 144.7, 144.6, 136.5, 134.8, 132.0, 131.0, 129.6, 129.3, 129.1, 129.0, 128.9, 128.7, 128.6, 127.1, 124.74, 124.70, 124.25, 113.7, 55.2. HRMS (ESI TOF) ( $m/z$ ):  $[M + H]^+$  calcd for C<sub>22</sub>H<sub>17</sub>ClNO<sub>2</sub><sup>+</sup> 362.0942 found, 362.0944. HPLC separation (Chiralcel<sup>®</sup>-ODH, *n*-hexane/*i*-PrOH 80:20, 0.8 mL/min, detection at 254 nm): =  $t_r$ (minor) = 14.8 min,  $t_r$ (major) = 24.7 min, 91% *ee*.  $[\alpha]_D^{20} = -31$  ( $c = 0.10$ , Acetone).

(*S*)-1-([1,1'-biphenyl]-2-yl)isoquinoline 2-oxide (Table 2, Entry **1e**): Solid (18.7 mg, 63%

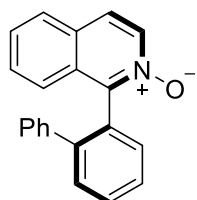

yield, 41% *ee*). Analytical data for **1e**:  $[\alpha]_D^{20} = +105$  ( $c = 0.10$ , Acetone, 41% *ee*). The enantiomeric excess was determined by (Chiralcel<sup>®</sup>-ODH, *n*-hexane/*i*-PrOH 70:30, 1.0 mL/min, detection at 254 nm): =  $t_r$ (major) = 7.4 min,  $t_r$ (minor) = 8.6 min, 41% *ee*.

(*R*)-1-(4-methoxy-[1,1':3',1''-terphenyl]-2'-yl)isoquinoline 2-oxide (Table 2, Entry **3t**):

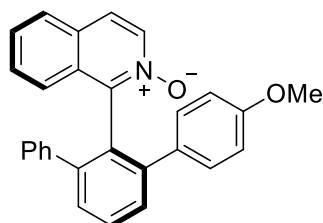

Following the general procedure for arylation, the title compound was isolated from column chromatography (80% EtOAc/*n*-hexane) as brown solid, yield = 11.3 mg (28%). MP = 218-220 °C. <sup>1</sup>H NMR (500 MHz, CDCl<sub>3</sub>,  $\delta$ ): 8.06 (d,  $J = 7.0$  Hz, 1H), 7.65 (t,  $J = 8.0$  Hz, 1H), 7.52-7.50 (m, 3H), 7.38 (d,  $J = 7.0$  Hz, 1H), 7.35-7.22 (m, 6H),

7.09-7.02 (m, 4H), 6.62-6.59 (m, 2H), 3.65 (s, 3H). <sup>13</sup>C{<sup>1</sup>H} NMR (125 MHz, CDCl<sub>3</sub>,  $\delta$ ): 13C 158.9, 147.1, 143.4, 143.0, 140.7, 136.2, 133.1, 129.9, 129.65, 129.61, 129.29, 129.23, 129.03, 128.5, 128.3, 128.1, 127.9, 127.3, 126.7, 125.14, 125.11, 125.09, 123.5, 113.4, 55.1. HRMS (ESI TOF) ( $m/z$ ):  $[M + Na]^+$  calcd for C<sub>28</sub>H<sub>21</sub>NNaO<sub>2</sub><sup>+</sup> 426.1465 found, 426.1464. HPLC

separation (Chiralcel<sup>®</sup>-ODH, *n*-hexane/*i*-PrOH 70:30, 1.0 mL/min, detection at 274 nm): =  $t_r$  (minor) = 15.7 min,  $t_r$  (major) = 18.5 min, 86% *ee*.  $[\alpha]_D^{20} = -31$  (c = 0.10, Acetone).

(*S*)-1-(2-isopropylphenyl)isoquinoline 2-oxide (Table 2, Entry **1f**): Solid (14.5 mg, 55% yield, 21% *ee*). Analytical data for **1f**:  $[\alpha]_D^{20} = +23$  (c = 0.10, Acetone, 18% *ee*). The enantiomeric excess was determined by (Chiralcel<sup>®</sup>-ODH, *n*-hexane/*i*-PrOH 90:10, 1.0 mL/min, detection at 254 nm): =  $t_r$  (major) = 14.0 min,  $t_r$  (minor) = 17.3 min, 21% *ee*.

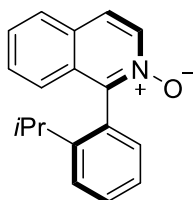

(*R*)-1-(3-isopropyl-4'-methoxy-[1,1'-biphenyl]-2-yl)isoquinoline 2-oxide (Table 2, Entry **3u**):

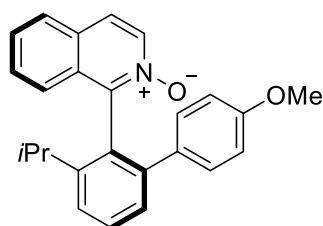

Following the general procedure for arylation, the title compound was isolated from column chromatography (80% EtOAc/*n*-hexane) as brown solid, yield = 14.8 mg (40%). MP = 204-206 °C. <sup>1</sup>H NMR (500 MHz, CDCl<sub>3</sub>, δ): 8.21 (d, *J* = 7.0 Hz, 1H), 7.87 (dd, *J* = 7.5, 1.0 Hz, 1H), 7.82-7.81 (m, 1H), 7.65-7.62 (m, 1H), 7.57-7.52 (m, 2H), 7.45-7.42 (m, 1H), 7.36 (dd, *J* = 7.5, 1.5 Hz, 1H), 7.13- 7.09 (m, 2H), 7.08-7.06 (m, 1H), 6.57-6.54 (m, 2H), 3.59 (s, 3H), 2.35-2.26 (m, 1H), 1.33 (d, *J* = 6.5 Hz, 3H), 0.87 (d, *J* = 6.5 Hz, 3H). <sup>13</sup>C{<sup>1</sup>H} NMR (125 MHz, CDCl<sub>3</sub>, δ): 160.34, 149.89, 148.97, 143.74, 136.46, 134.58, 131.40, 131.11, 130.67, 130.65, 130.53, 130.10, 129.12, 128.87, 128.14, 126.68, 125.81, 125.69, 114.25, 32.68, 24.63, 23.93, 20.72. HRMS (ESI TOF) (m/z): [M + Na]<sup>+</sup> calcd for C<sub>25</sub>H<sub>23</sub>NNaO<sub>2</sub><sup>+</sup> 392.1621 found, 392.1620. HPLC separation (Chiralcel<sup>®</sup>-ODH, *n*-hexane/*i*-PrOH 80:20, 1.0 mL/min, detection at 254 nm): =  $t_r$  (minor) = 6.8 min,  $t_r$  (major) = 8.8 min, 83% *ee*.  $[\alpha]_D^{20} = -40$  (c = 0.10, Acetone).

(*S*)-1-(2-(benzyloxy)phenyl)isoquinoline 2-oxide (Table 2, Entry **1g**): Solid (12.4 mg, 38% yield, 83% *ee*). Analytical data for **1g**:  $[\alpha]_D^{20} = +19$  (c = 0.10, Acetone, 83% *ee*). The enantiomeric excess was determined by (Lux<sup>®</sup> 5 μm Amylose-1, *n*-hexane/*i*-PrOH 70:30, 1.0 mL/min, detection at 274 nm): =  $t_r$  (minor) = 13.5 min,  $t_r$  (major) = 15.8 min, 83% *ee*.

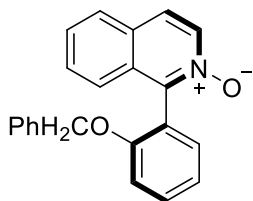

(*R*)-1-(3-(benzyloxy)-4'-methoxy-[1,1'-biphenyl]-2-yl)isoquinoline 2-oxide (Table 2, Entry

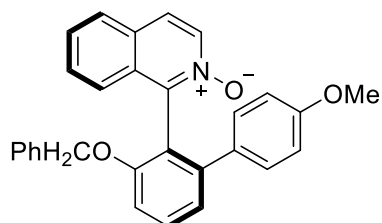

**3v**): Following the general procedure for arylation, the title compound was isolated from column chromatography (80% EtOAc/*n*-hexane) as brown solid, yield = 24.2 mg (56%). MP = 114-116 °C. <sup>1</sup>H NMR (500 MHz, CDCl<sub>3</sub>, δ): 8.38 (d, *J* = 7.0 Hz, 1H), 7.68 (d, *J* = 8.0 Hz, 1H), 7.61 (d, *J* = 7.0 Hz, 1H), 7.52 (dd, *J* = 8.5, 8.0 Hz, 1H), 7.48-7.45 (m, 1H), 7.37-7.34 (m, 1H), 7.23-7.13 (m, 7H), 7.07 (dd, *J*

= 8.5, 1.0 Hz, 1H), 7.04-7.00 (m, 2H), 6.62-6.59 (m, 2H), 5.11 (d,  $J = 12.5$  Hz, 1H), 5.03 (d,  $J = 12.5$  Hz, 1H), 3.63 (s, 3H).  $^{13}\text{C}\{^1\text{H}\}$  NMR (125 MHz,  $\text{CDCl}_3$ ,  $\delta$ ): 159.0, 156.7, 146.1, 143.9, 136.9, 136.3, 132.6, 131.2, 129.7, 129.3, 129.2, 129.16, 129.11, 128.4, 127.6, 126.84, 126.81, 126.8, 125.7, 123.7, 122.7, 119.0, 113.6, 111.8, 70.5, 55.1. HRMS (ESI TOF) ( $m/z$ ):  $[\text{M} + \text{Na}]^+$  calcd for  $\text{C}_{29}\text{H}_{23}\text{NNaO}_3^+$  456.1570 found, 456.1570. HPLC separation (Chiralcel<sup>®</sup>-ODH, *n*-hexane/*i*-PrOH 70:30, 1.0 mL/min, detection at 274 nm): =  $t_r$  (minor) = 38.8 min,  $t_r$  (major) = 44.6 min, 82% *ee*.  $[\alpha]_{\text{D}}^{20} = -25$  ( $c = 0.10$ , Acetone).

(*R*)-1-(2-(4-methoxyphenyl)naphthalen-1-yl)isoquinoline (Scheme 1, **4a**): Yield is 60%,  $^1\text{H}$

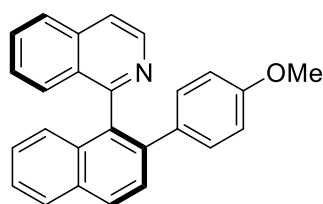

NMR (500 MHz,  $\text{CDCl}_3$ ,  $\delta$ ): 8.65 (d,  $J = 5.4$  Hz, 1H), 8.04 (d,  $J = 8.4$  Hz, 1H), 7.95 (d,  $J = 7.8$  Hz, 1H), 7.79 (d,  $J = 8.4$  Hz, 1H), 7.65-7.64 (m, 2H), 7.56-7.53 (m, 1H), 7.47-7.44 (m, 1H), 7.40-7.38 (m, 1H), 7.31-7.25 (m, 2H), 7.16 (d,  $J = 7.8$  Hz, 1H), 7.12-7.08 (m, 2H),

6.57-6.54 (m, 2H), 3.64 (s, 3H).  $^{13}\text{C}\{^1\text{H}\}$  NMR (125 MHz,  $\text{CDCl}_3$ ,  $\delta$ ): 160.4, 158.3, 142.0, 139.1, 136.2, 134.1, 133.9, 133.7, 133.1, 132.8, 130.6, 130.2, 129.5, 129.0, 128.7, 128.3, 128.2, 128.1, 127.4, 127.2, 126.9, 126.8, 126.7, 126.3, 125.8, 120.2, 120.2, 115.5, 113.2, 55.1. HPLC separation (Lux<sup>®</sup> 5  $\mu\text{m}$  Amylose-1, *n*-hexane/*i*-PrOH 80:20, 1.0 mL/min, detection at 254 nm): =  $t_r$  (minor) = 17.0 min,  $t_r$  (major) = 22.3 min, 83% *ee*

## 7.0 $^1\text{H}$ , $^{13}\text{C}$ and HPLC spectral data

(*R*)-1-(2-(4-methoxyphenyl)naphthalen-1-yl)isoquinoline 2-oxide (**3a**)

$^1\text{H}$  NMR (500 MHz)

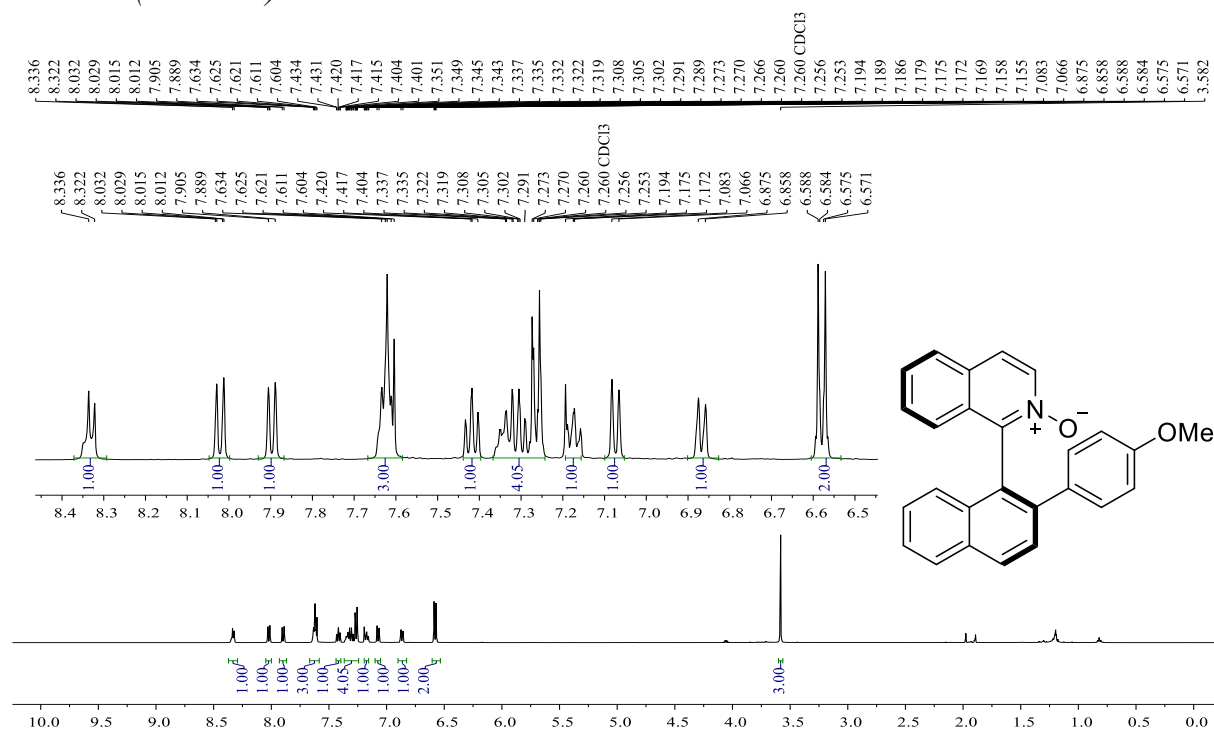

$^{13}\text{C}\{^1\text{H}\}$  NMR (125 MHz)

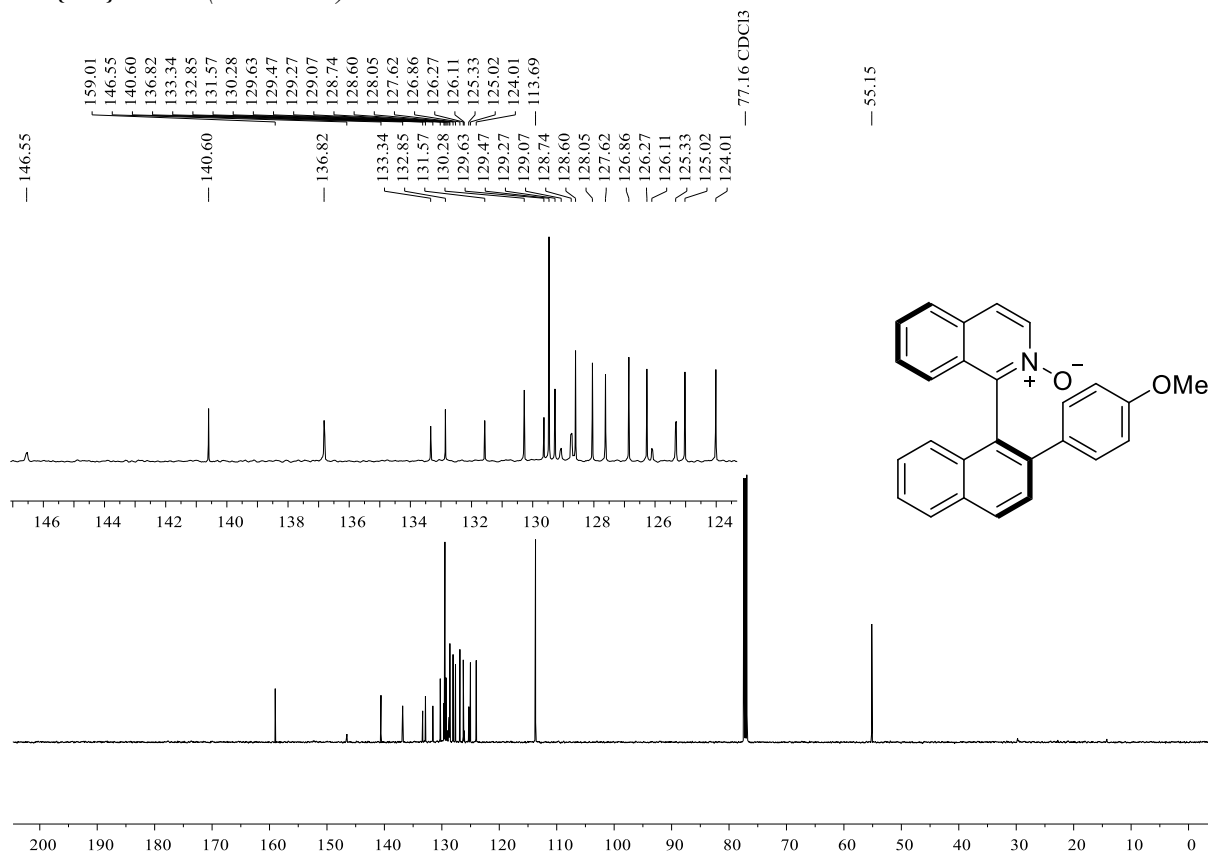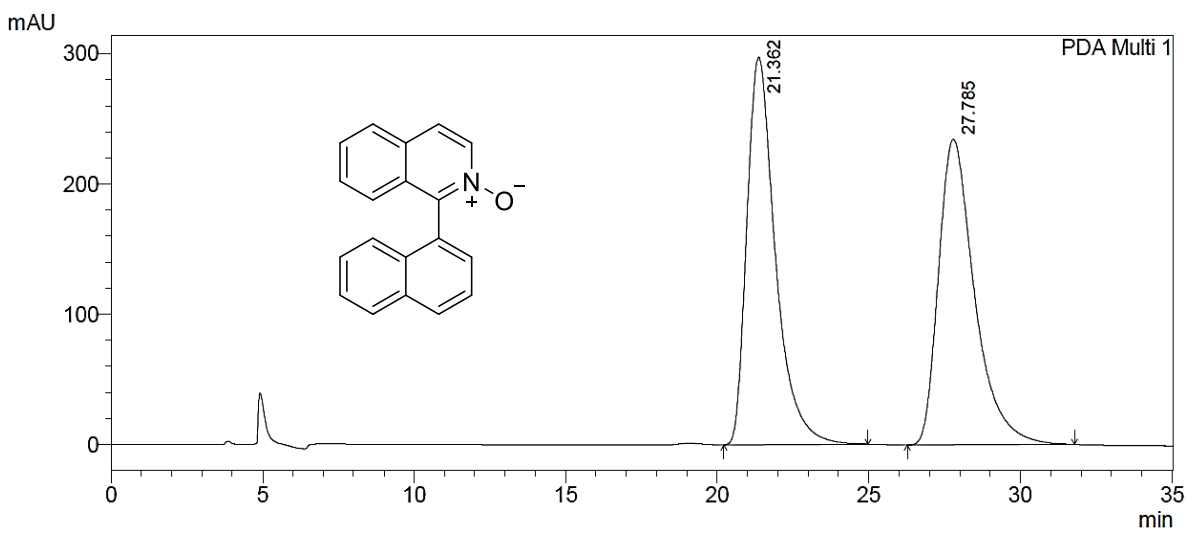

PDA Ch1 254nm 4mm

| Peak# | Ret. Time | Area     | Height | Area %  | Height % |
|-------|-----------|----------|--------|---------|----------|
| 1     | 21.362    | 19488777 | 297468 | 50.086  | 55.915   |
| 2     | 27.785    | 19421622 | 234536 | 49.914  | 44.085   |
| Total |           | 38910399 | 532004 | 100.000 | 100.000  |

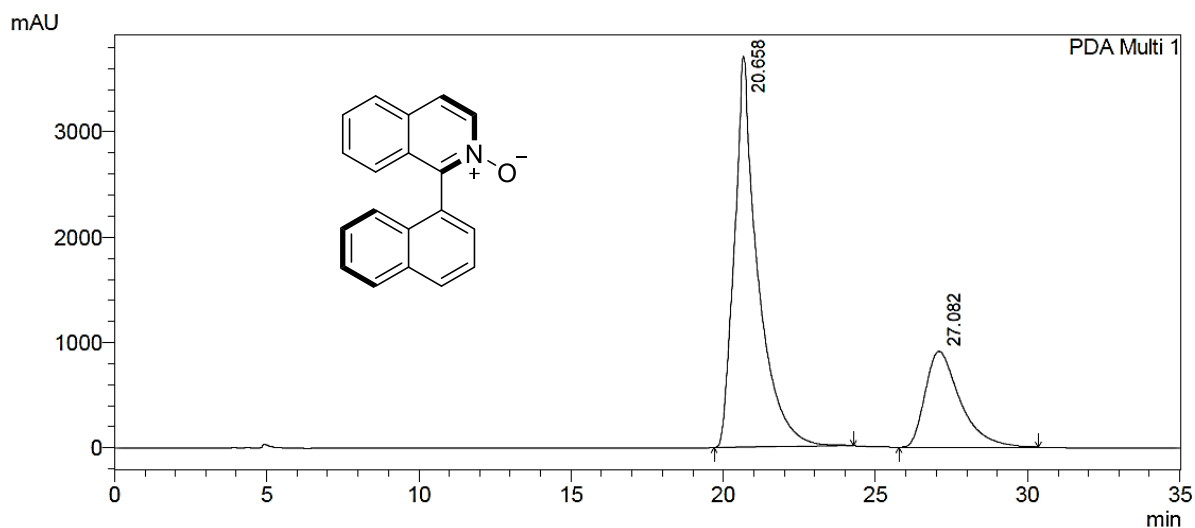

PDA Ch1 254nm 4nm

| Peak# | Ret. Time | Area      | Height  | Area %  | Height % |
|-------|-----------|-----------|---------|---------|----------|
| 1     | 20.658    | 197090452 | 3703789 | 73.126  | 80.288   |
| 2     | 27.082    | 72432605  | 909355  | 26.874  | 19.712   |
| Total |           | 269523057 | 4613143 | 100.000 | 100.000  |

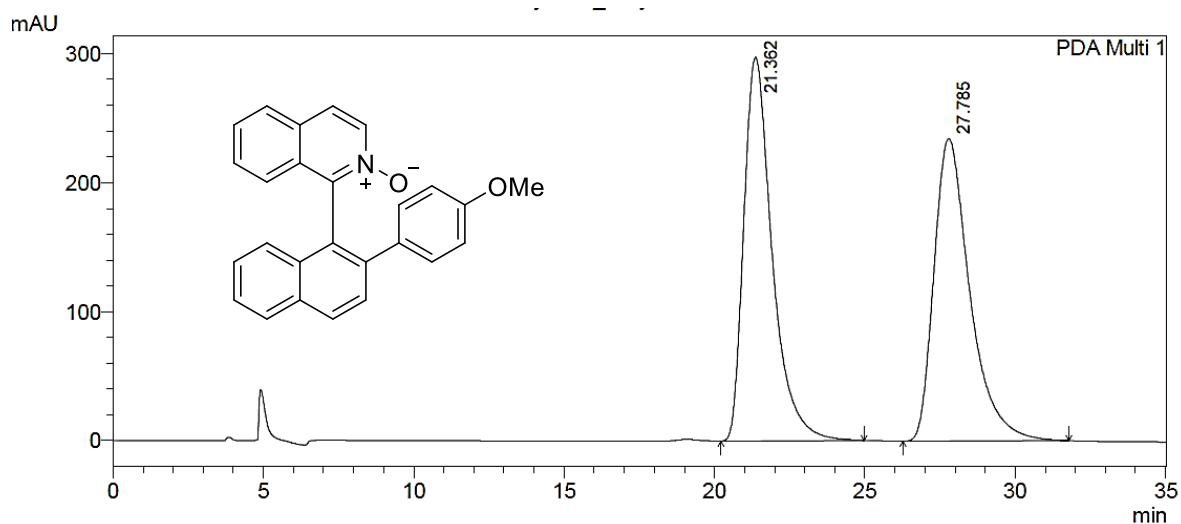

PDA Ch1 254nm 4nm

| Peak# | Ret. Time | Area     | Height | Area %  | Height % |
|-------|-----------|----------|--------|---------|----------|
| 1     | 21.362    | 19488777 | 297468 | 50.086  | 55.915   |
| 2     | 27.785    | 19421622 | 234536 | 49.914  | 44.085   |
| Total |           | 38910399 | 532004 | 100.000 | 100.000  |

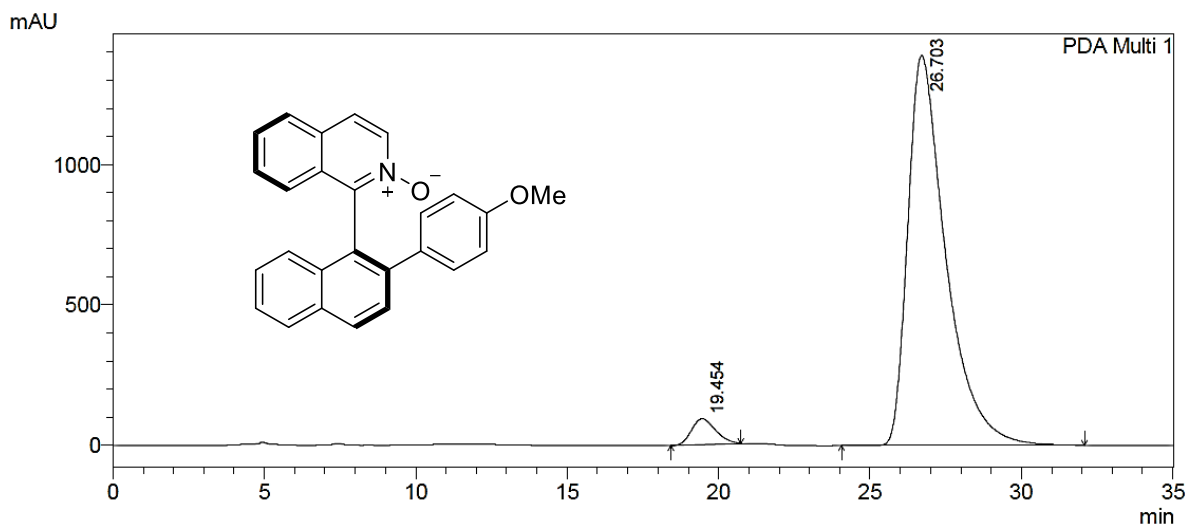

PDA Ch1 254nm 4mm

| Peak# | Ret. Time | Area      | Height  | Area %  | Height % |
|-------|-----------|-----------|---------|---------|----------|
| 1     | 19.454    | 5082867   | 91982   | 4.013   | 6.206    |
| 2     | 26.703    | 121567904 | 1390062 | 95.987  | 93.794   |
| Total |           | 126650770 | 1482044 | 100.000 | 100.000  |

*(R)*-1-(2-(*p*-tolyl)naphthalen-1-yl)isoquinoline 2-oxide (**3b**)

<sup>1</sup>H NMR (600 MHz)

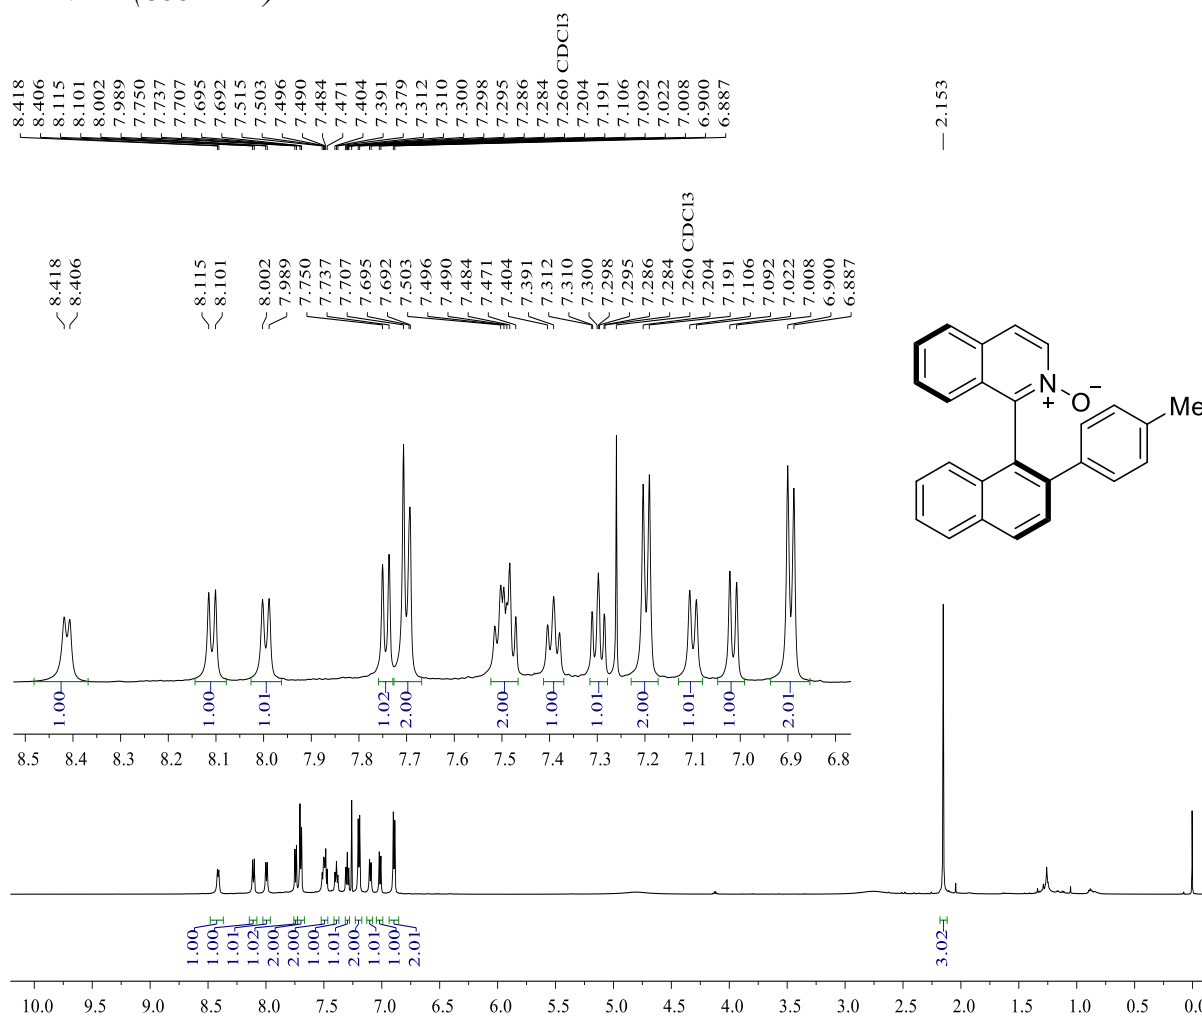



$^{13}\text{C}\{^1\text{H}\}$  NMR (125 MHz)

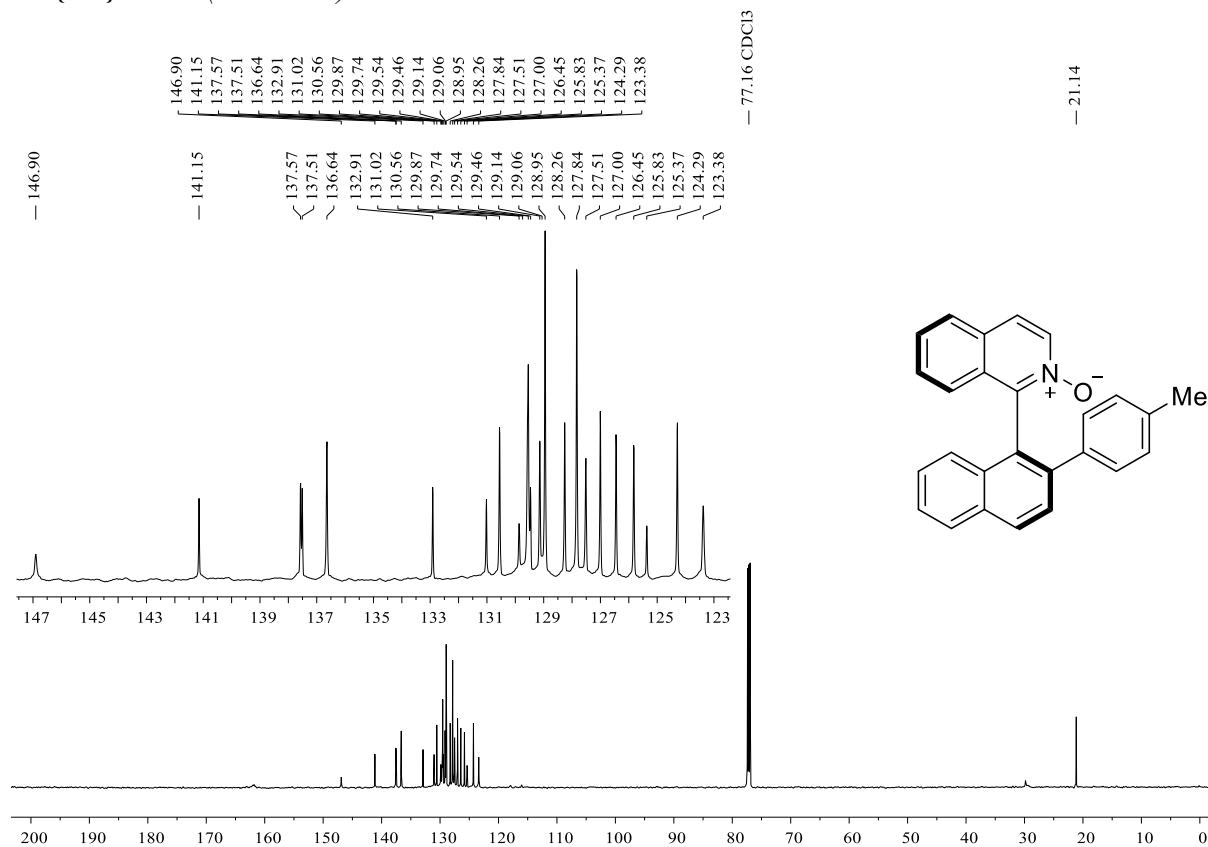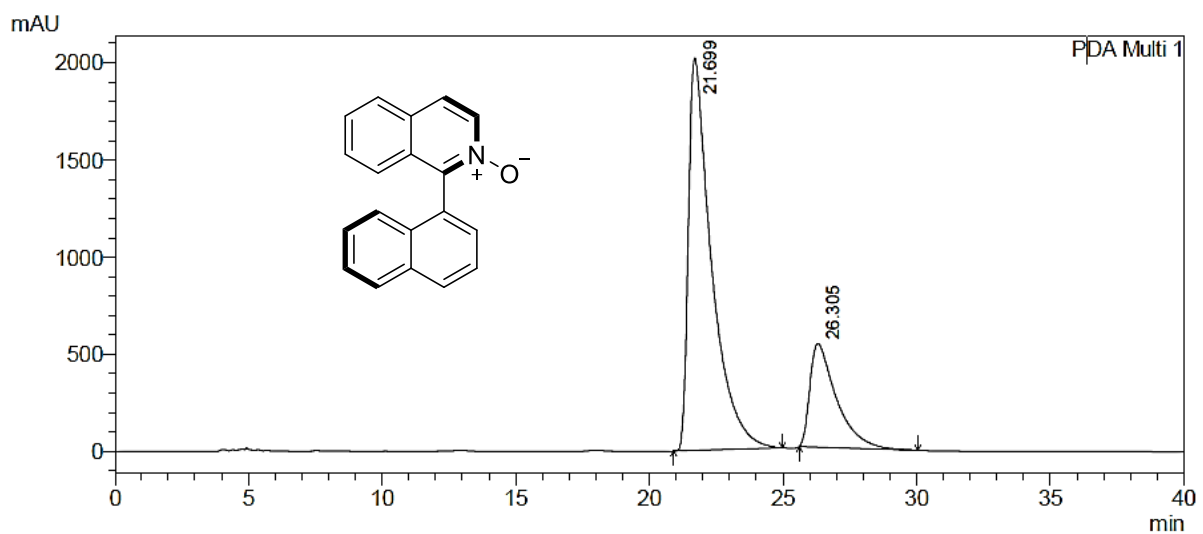

PDA Ch1 254nm 4mm

| Peak# | Ret. Time | Area      | Height  | Area %  | Height % |
|-------|-----------|-----------|---------|---------|----------|
| 1     | 21.699    | 121412135 | 2017360 | 76.834  | 79.138   |
| 2     | 26.305    | 36606779  | 531797  | 23.166  | 20.862   |
| Total |           | 158018914 | 2549157 | 100.000 | 100.000  |

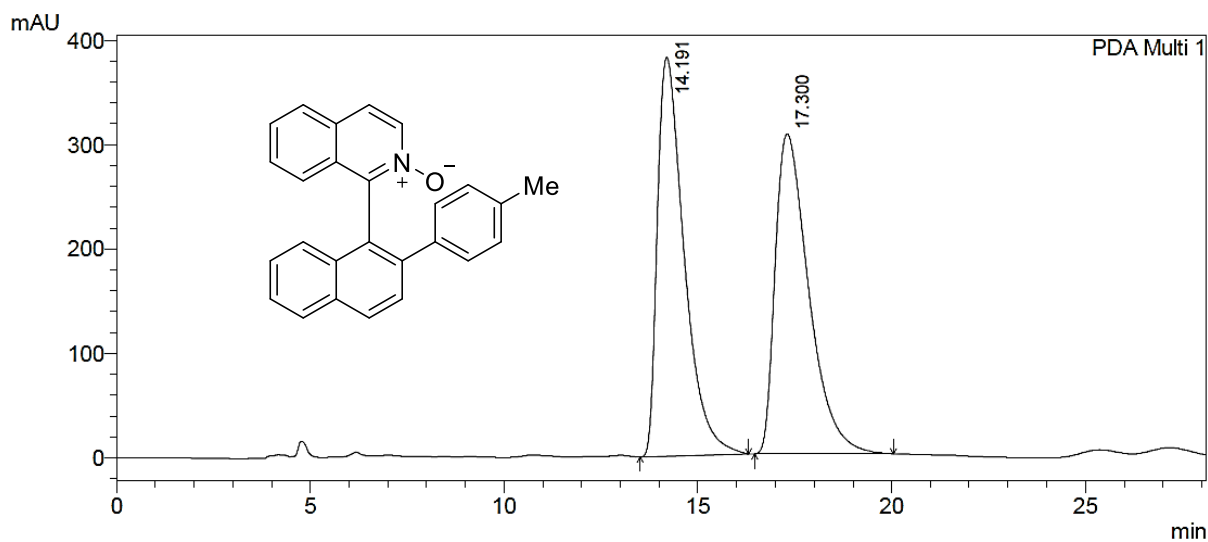

PDA Ch1 274nm 4mm

| Peak# | Ret. Time | Area     | Height | Area %  | Height % |
|-------|-----------|----------|--------|---------|----------|
| 1     | 14.191    | 18396272 | 381946 | 49.901  | 55.487   |
| 2     | 17.300    | 18469428 | 306408 | 50.099  | 44.513   |
| Total |           | 36865700 | 688354 | 100.000 | 100.000  |

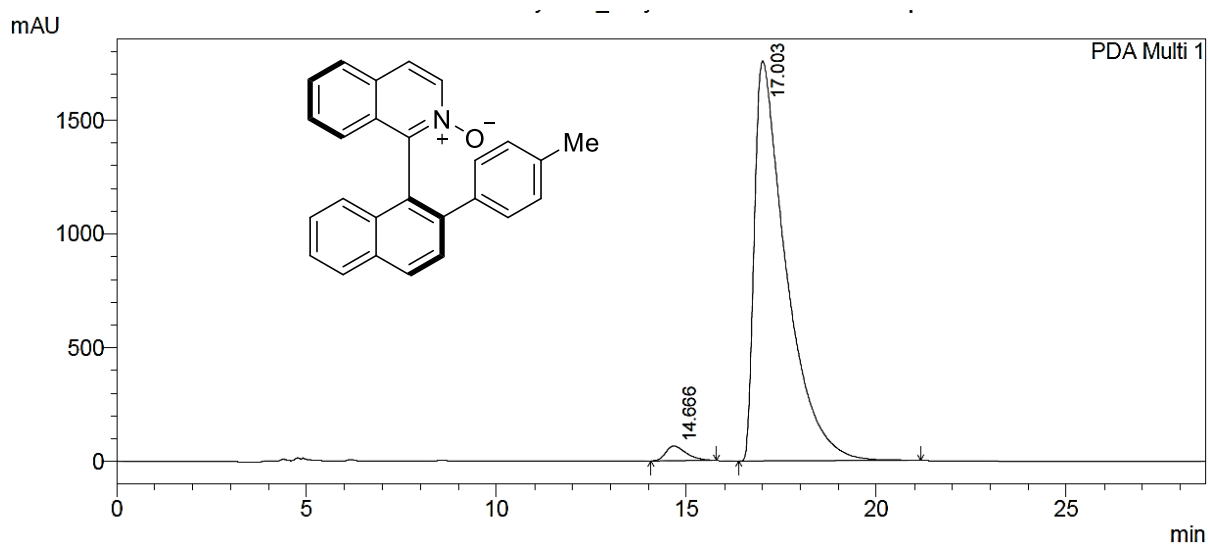

PDA Ch1 274nm 4mm

| Peak# | Ret. Time | Area      | Height  | Area %  | Height % |
|-------|-----------|-----------|---------|---------|----------|
| 1     | 14.666    | 2452510   | 64535   | 2.357   | 3.544    |
| 2     | 17.003    | 101593361 | 1756472 | 97.643  | 96.456   |
| Total |           | 104045872 | 1821006 | 100.000 | 100.000  |

*(R)*-1-(2-(4-(*tert*-butyl)phenyl)naphthalen-1-yl)isoquinoline 2-oxide (**3c**)

<sup>1</sup>H NMR (500 MHz)

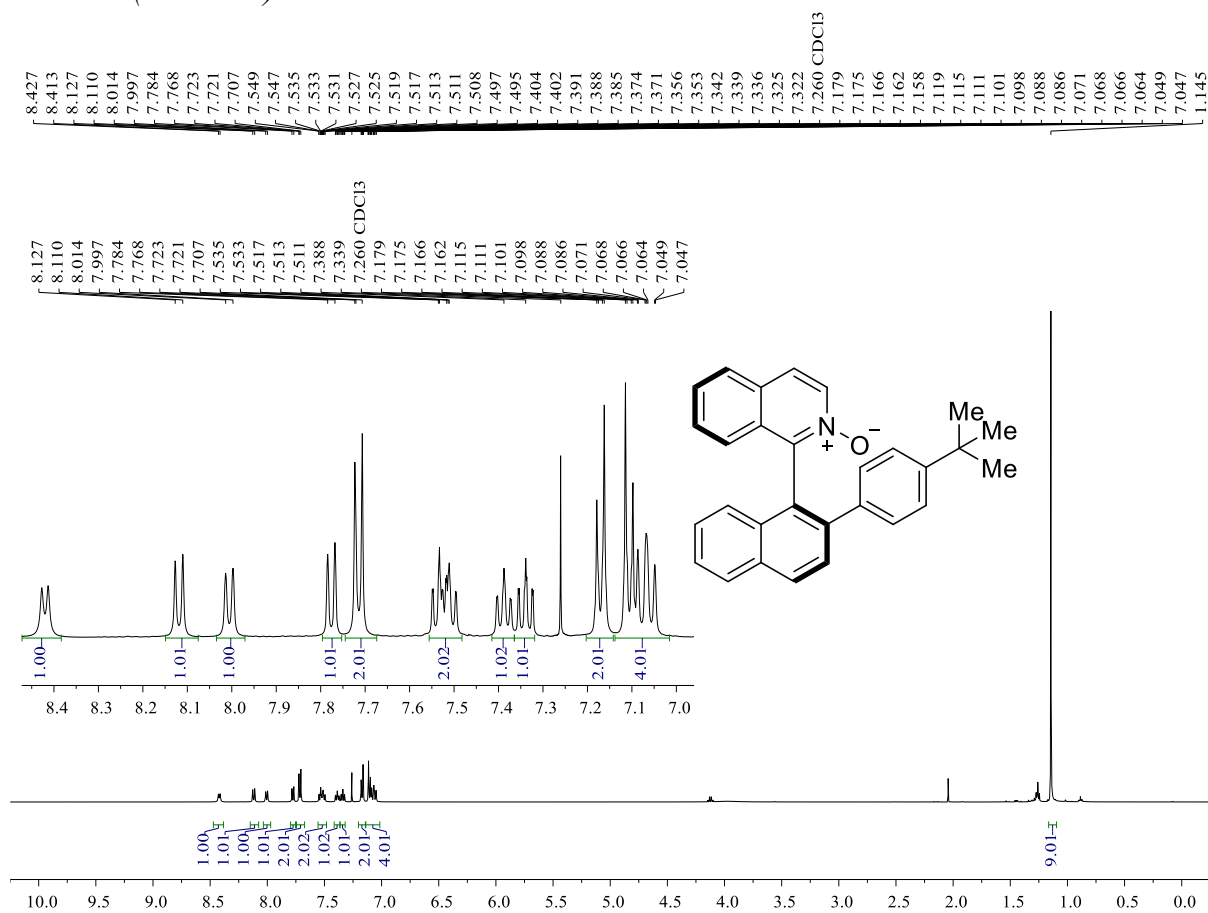

<sup>13</sup>C{<sup>1</sup>H} NMR (125 MHz)

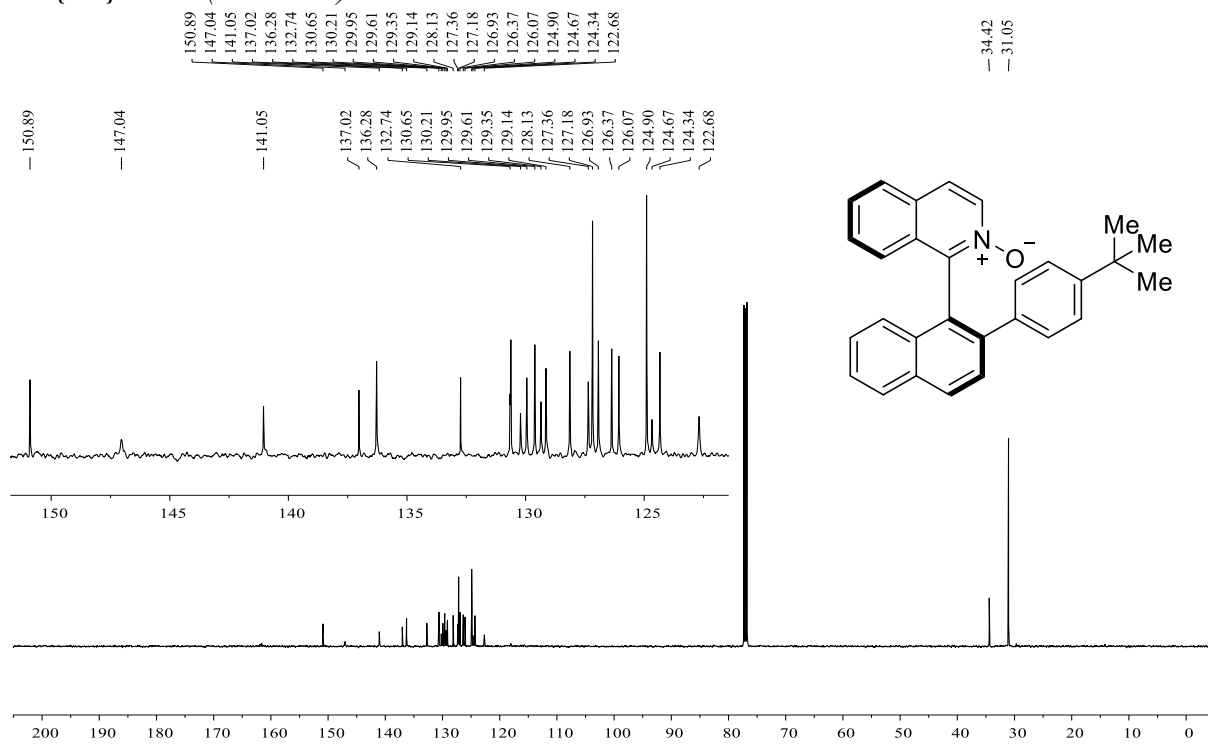

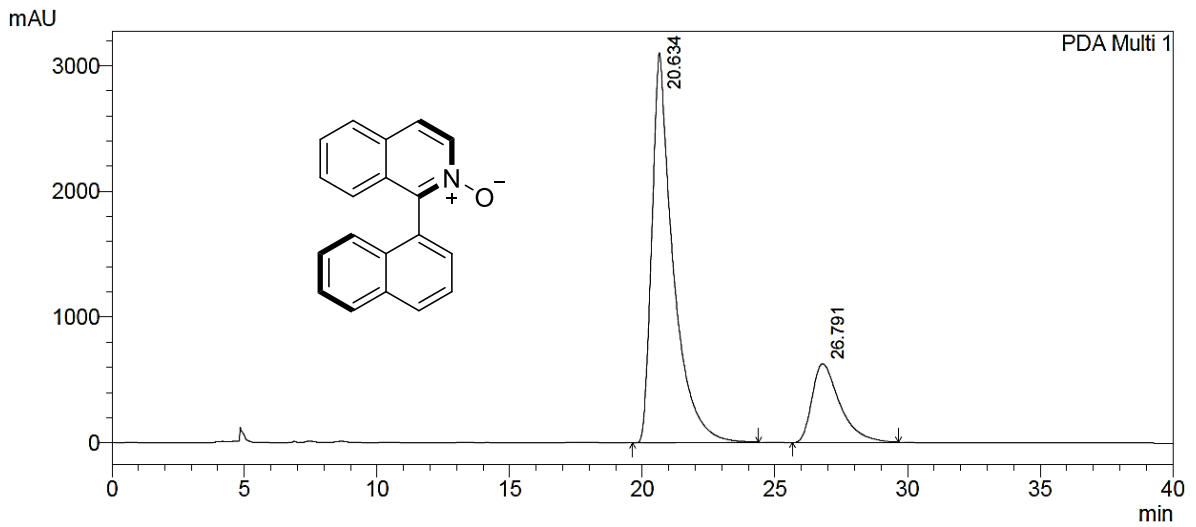

PDA Ch1 254nm 4mm

| Peak# | Ret. Time | Area      | Height  | Area %  | Height % |
|-------|-----------|-----------|---------|---------|----------|
| 1     | 20.634    | 171455541 | 3099627 | 78.986  | 83.186   |
| 2     | 26.791    | 45616360  | 626534  | 21.014  | 16.814   |
| Total |           | 217071901 | 3726161 | 100.000 | 100.000  |

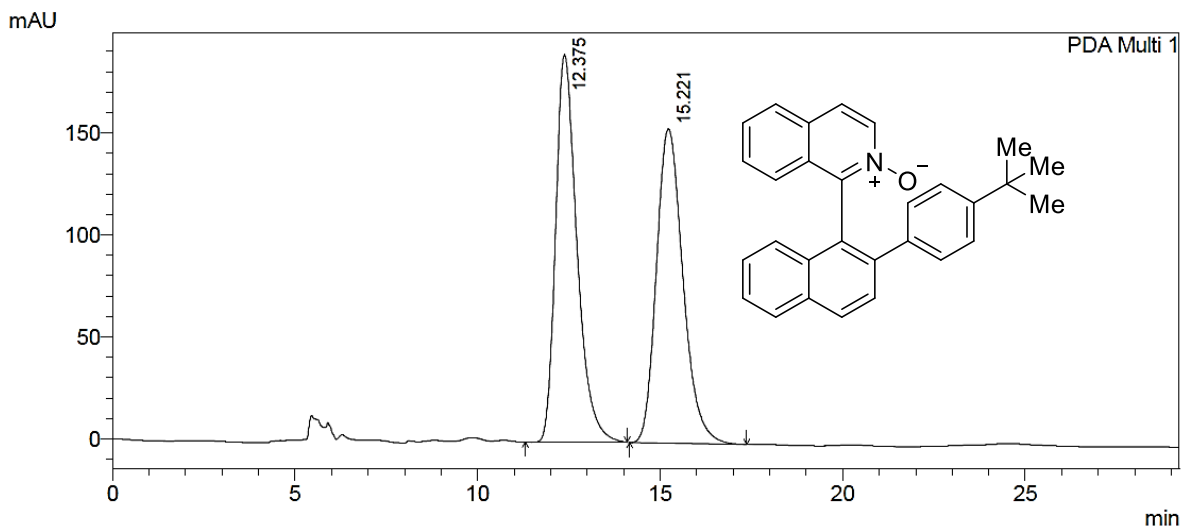

PDA Ch1 310nm 4mm

| Peak# | Ret. Time | Area     | Height | Area %  | Height % |
|-------|-----------|----------|--------|---------|----------|
| 1     | 12.375    | 7728664  | 190183 | 49.745  | 55.223   |
| 2     | 15.221    | 7808034  | 154207 | 50.255  | 44.777   |
| Total |           | 15536698 | 344390 | 100.000 | 100.000  |

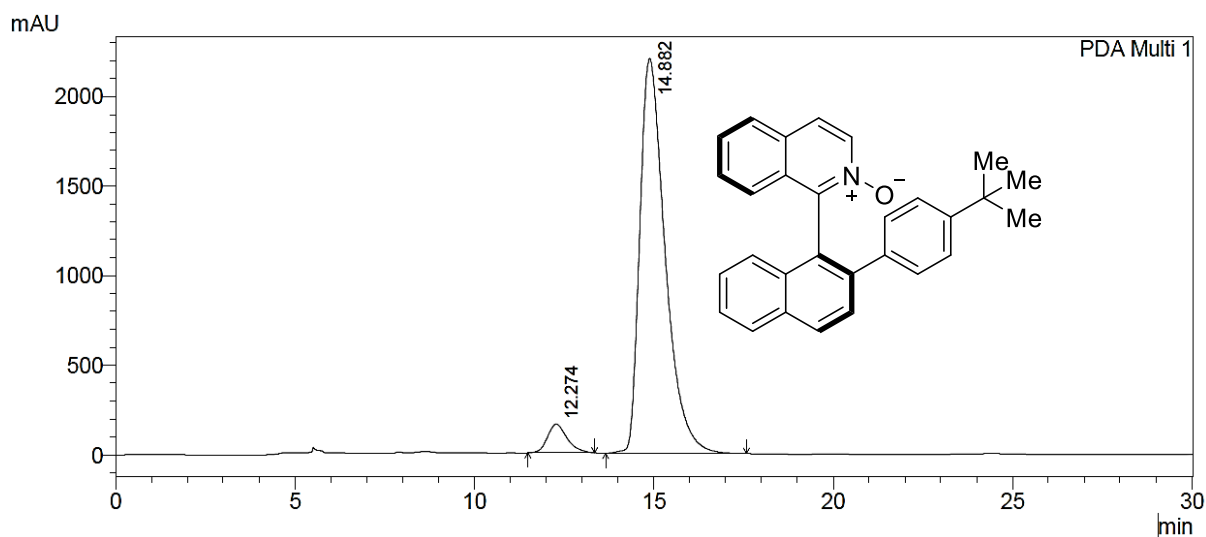

PDA Ch1 310mm 4mm

| Peak# | Ret. Time | Area      | Height  | Area %  | Height % |
|-------|-----------|-----------|---------|---------|----------|
| 1     | 12.274    | 6195355   | 161442  | 5.424   | 6.828    |
| 2     | 14.882    | 108027796 | 2202897 | 94.576  | 93.172   |
| Total |           | 114223152 | 2364339 | 100.000 | 100.000  |

*(R)-1-(2-(4-ethoxyphenyl)naphthalen-1-yl)isoquinoline 2-oxide (3d)*

<sup>1</sup>H NMR (500 MHz)

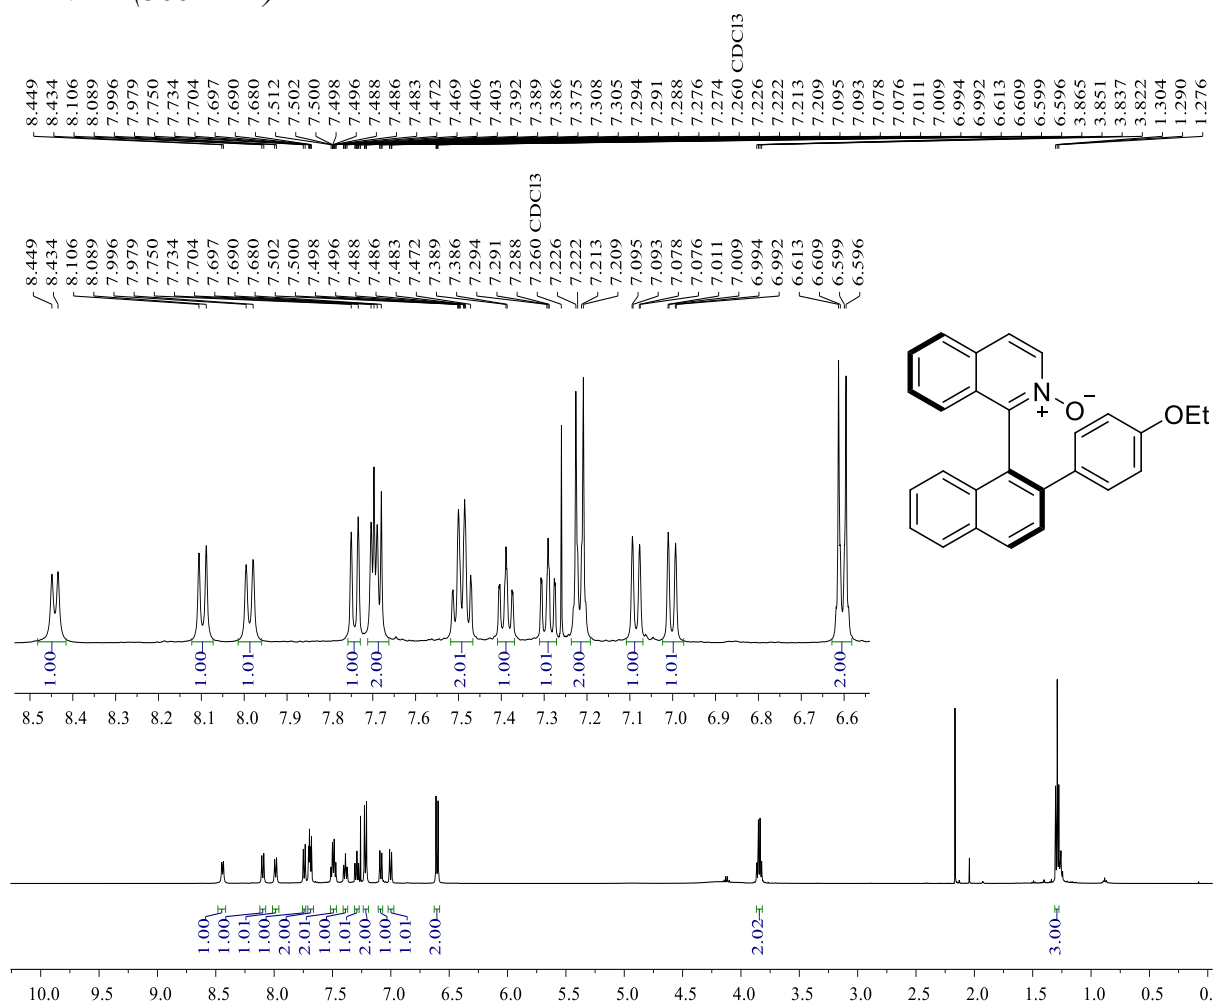

$^{13}\text{C}\{^1\text{H}\}$  NMR (125 MHz)

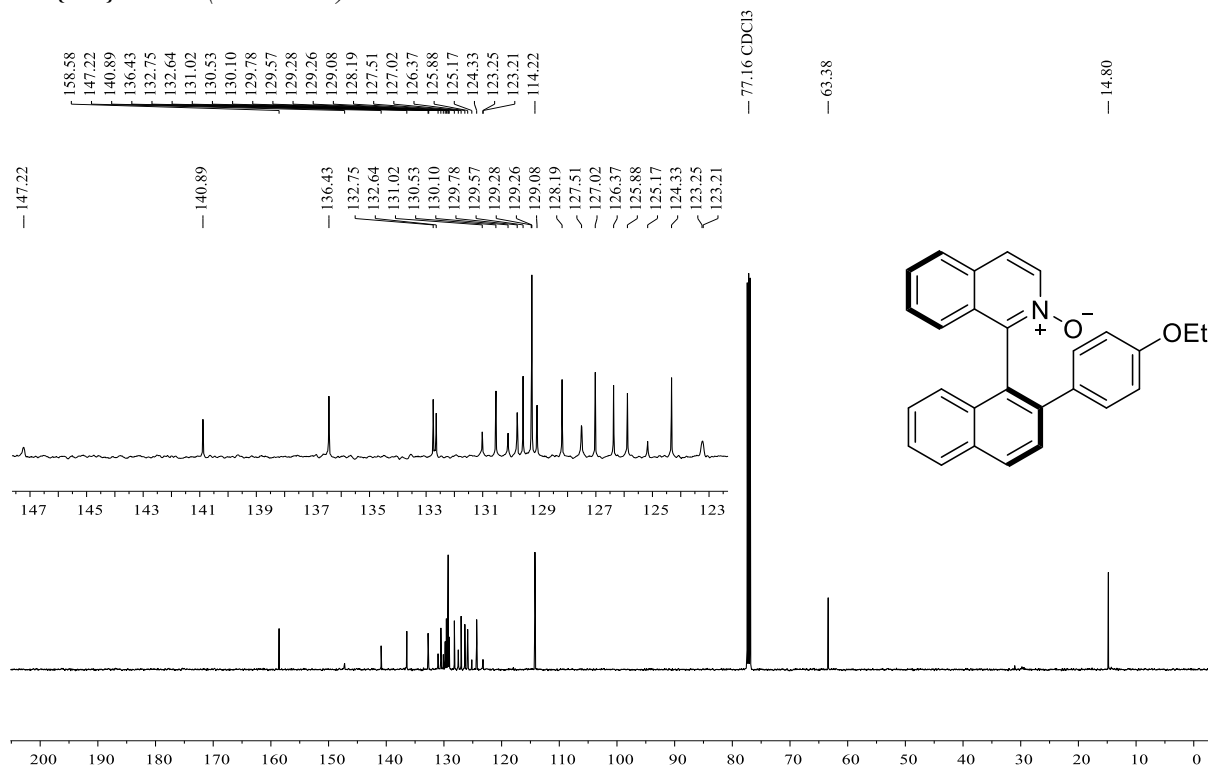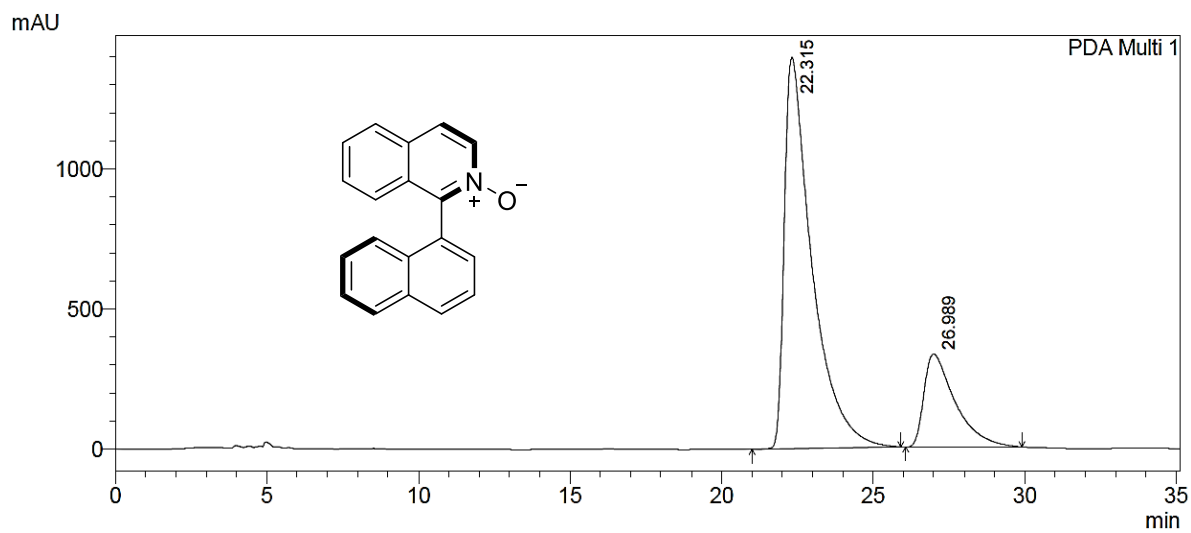

PDA Ch1 254nm 4mm

| Peak# | Ret. Time | Area      | Height  | Area %  | Height % |
|-------|-----------|-----------|---------|---------|----------|
| 1     | 22.315    | 88494450  | 1397385 | 78.842  | 80.822   |
| 2     | 26.989    | 23748487  | 331582  | 21.158  | 19.178   |
| Total |           | 112242937 | 1728968 | 100.000 | 100.000  |

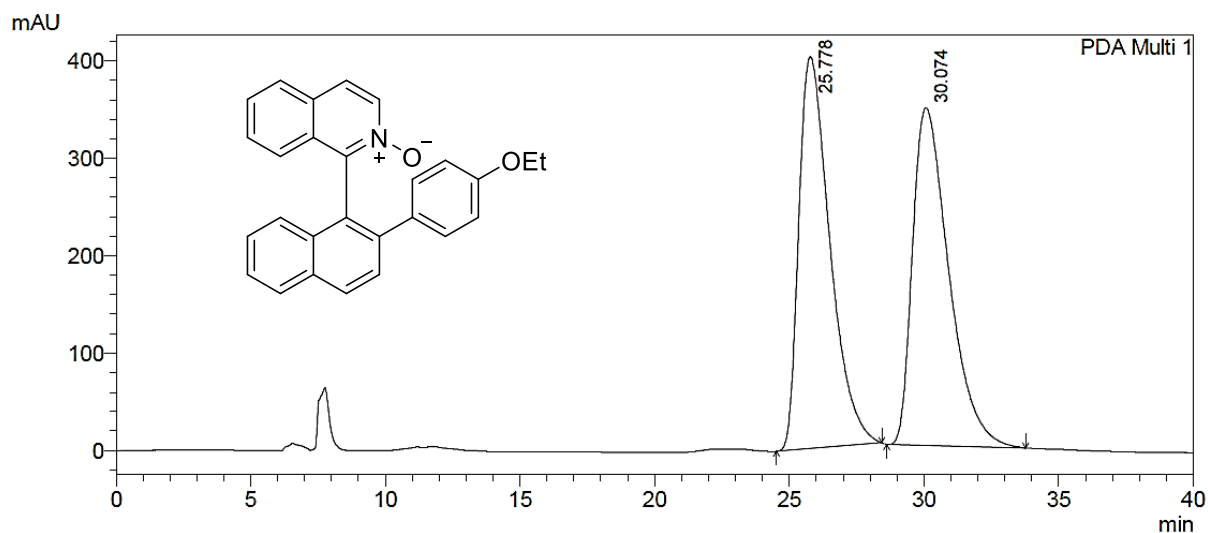

PDA Ch1 254nm 4mm

| Peak# | Ret. Time | Area     | Height | Area %  | Height % |
|-------|-----------|----------|--------|---------|----------|
| 1     | 25.778    | 32305839 | 402267 | 49.921  | 53.715   |
| 2     | 30.074    | 32408425 | 346623 | 50.079  | 46.285   |
| Total |           | 64714264 | 748891 | 100.000 | 100.000  |

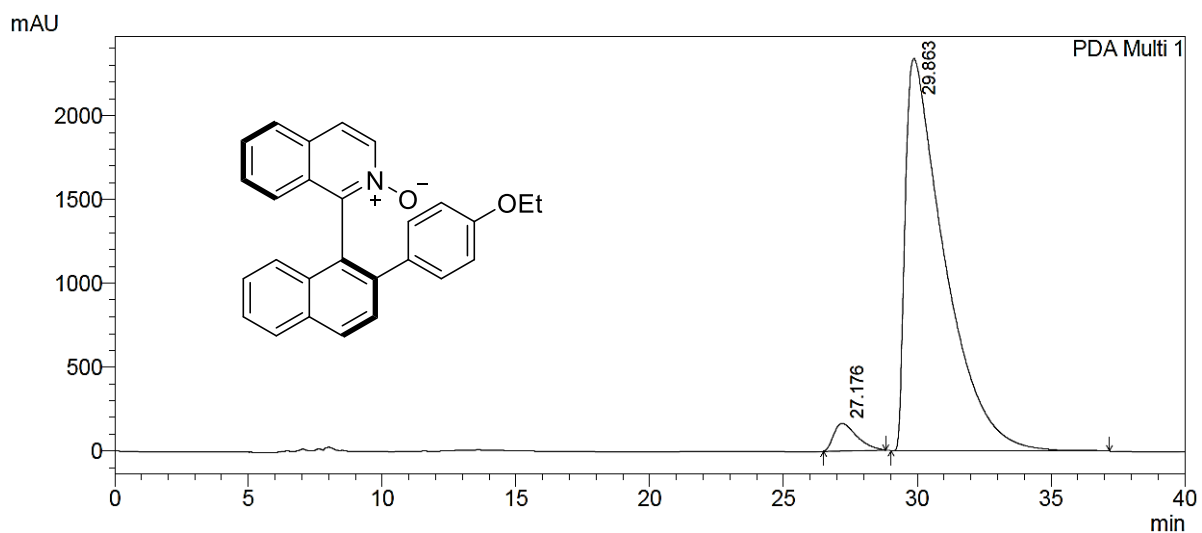

PDA Ch1 274nm 4mm

| Peak# | Ret. Time | Area      | Height  | Area %  | Height % |
|-------|-----------|-----------|---------|---------|----------|
| 1     | 27.176    | 9776516   | 163959  | 3.935   | 6.553    |
| 2     | 29.863    | 238690080 | 2338189 | 96.065  | 93.447   |
| Total |           | 248466595 | 2502148 | 100.000 | 100.000  |

*(R)*-1-(2-(4-(benzyloxy)phenyl)naphthalen-1-yl)isoquinoline 2-oxide (**3e**)

<sup>1</sup>H NMR (500 MHz)

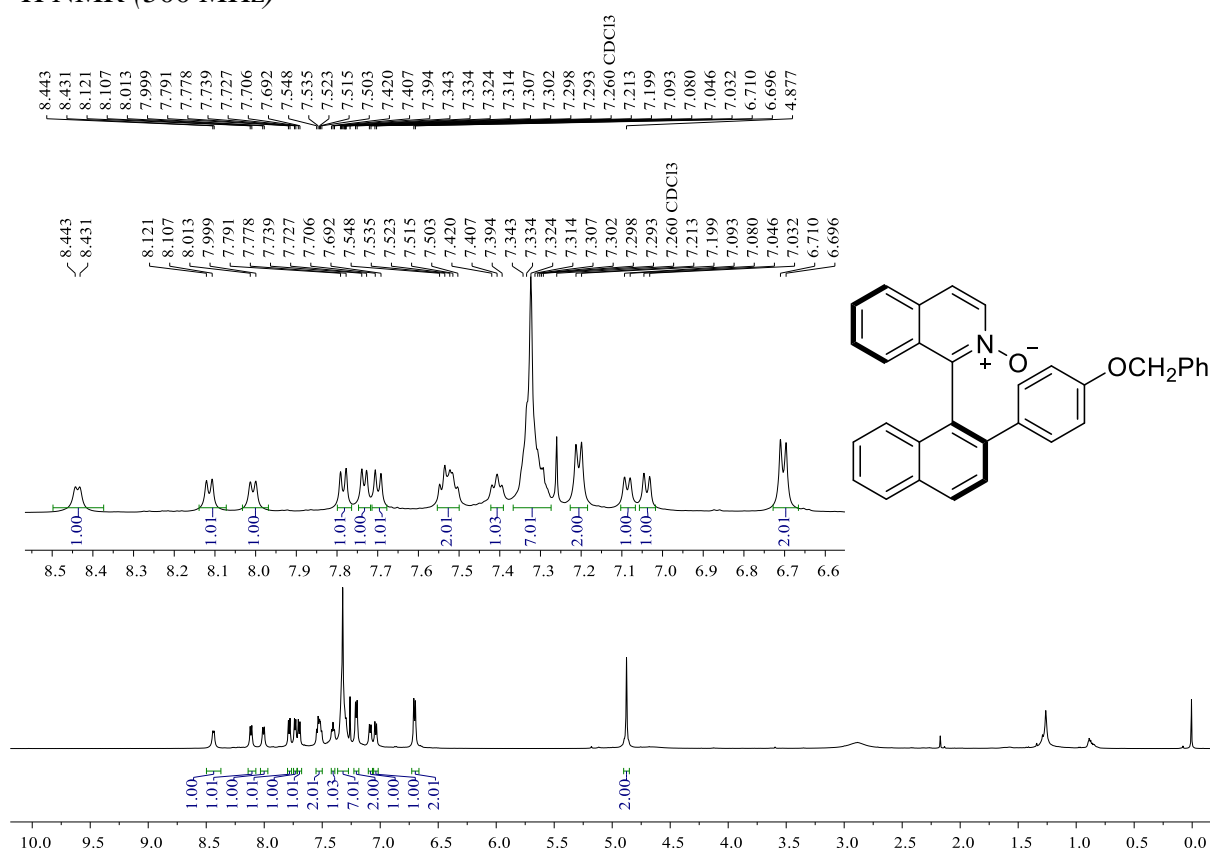

<sup>13</sup>C{<sup>1</sup>H} NMR (125 MHz)

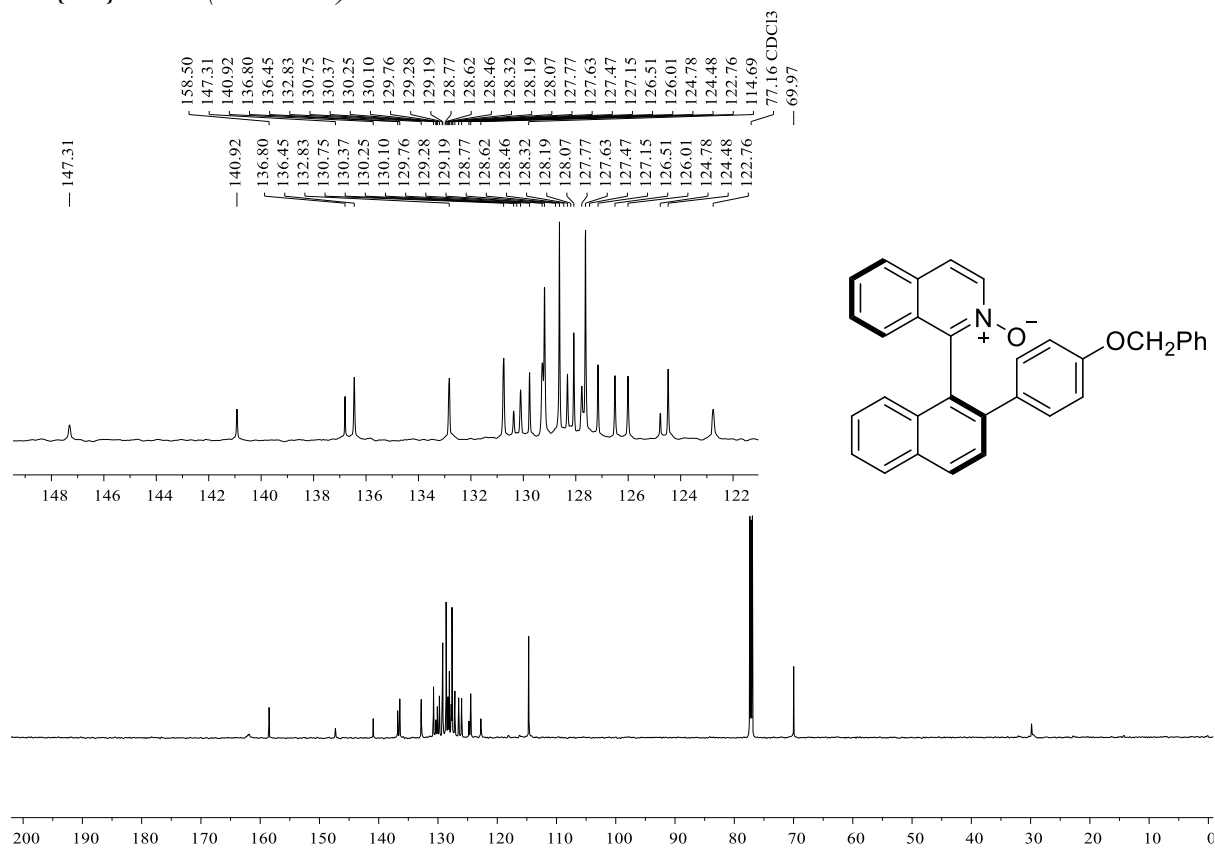



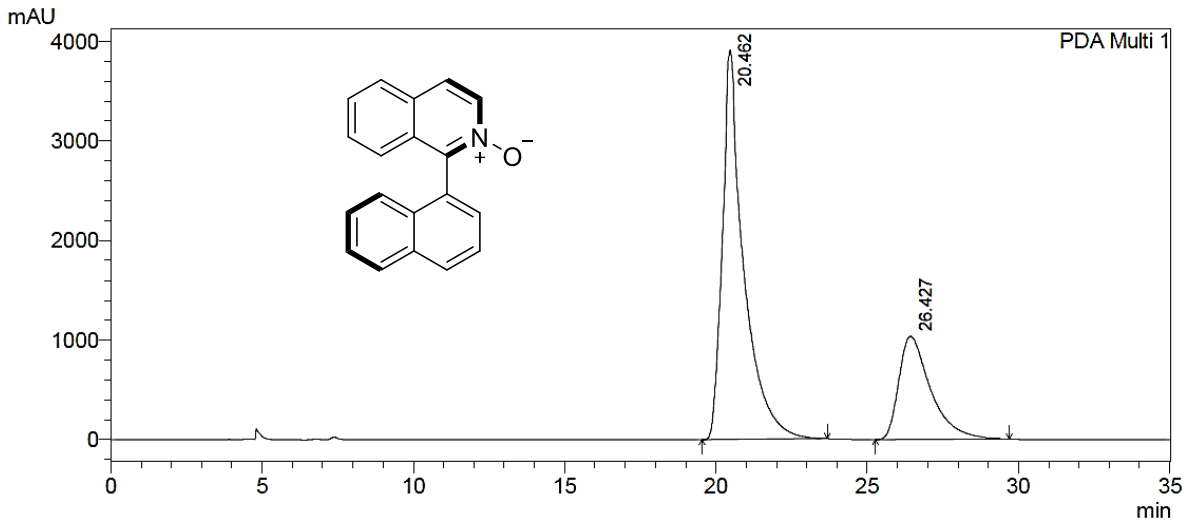

PDA Ch1 254nm 4mm

| Peak# | Ret. Time | Area      | Height  | Area %  | Height % |
|-------|-----------|-----------|---------|---------|----------|
| 1     | 20.462    | 190885805 | 3910273 | 71.559  | 79.057   |
| 2     | 26.427    | 75868754  | 1035857 | 28.441  | 20.943   |
| Total |           | 266754559 | 4946129 | 100.000 | 100.000  |

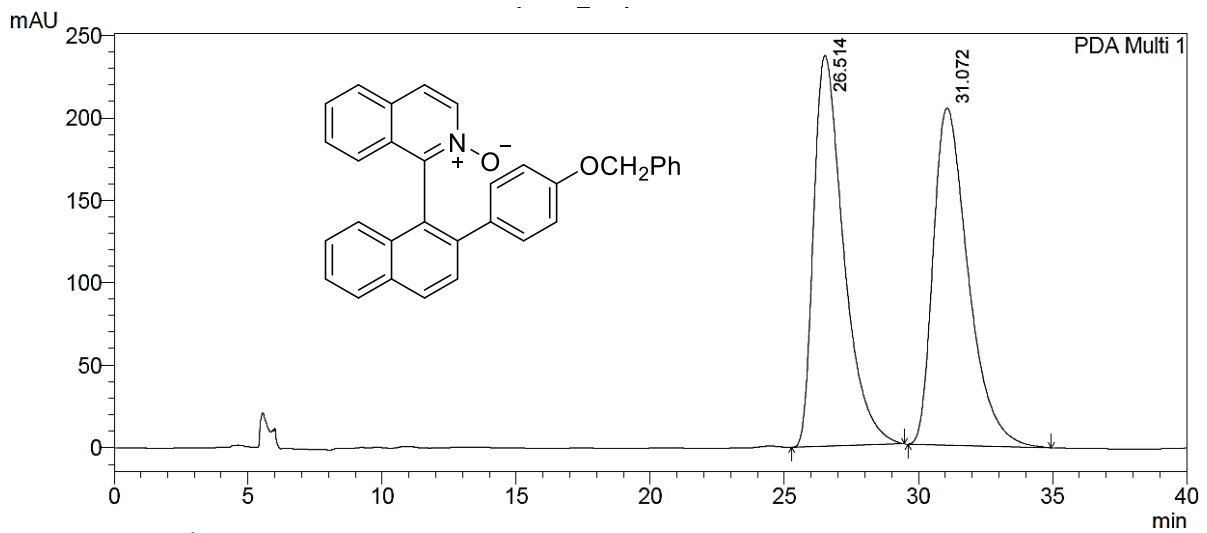

PDA Ch1 274nm 4mm

| Peak# | Ret. Time | Area     | Height | Area %  | Height % |
|-------|-----------|----------|--------|---------|----------|
| 1     | 26.514    | 18428864 | 237139 | 49.907  | 53.708   |
| 2     | 31.072    | 18497324 | 204395 | 50.093  | 46.292   |
| Total |           | 36926188 | 441534 | 100.000 | 100.000  |

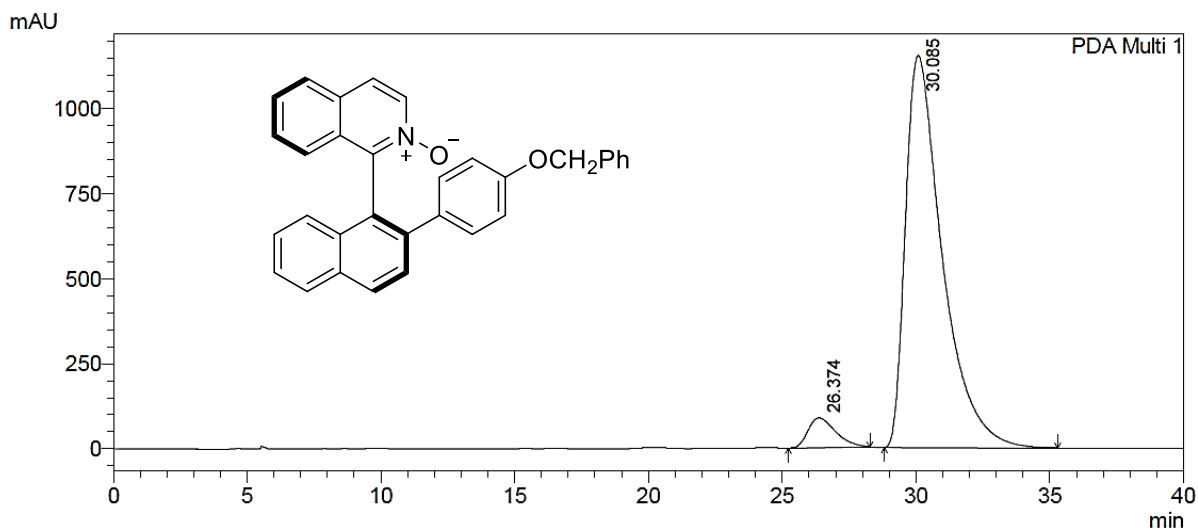

PDA Ch1 310nm 4nm

| Peak# | Ret. Time | Area      | Height  | Area %  | Height % |
|-------|-----------|-----------|---------|---------|----------|
| 1     | 26.374    | 6248380   | 87390   | 5.349   | 7.044    |
| 2     | 30.085    | 110575207 | 1153324 | 94.651  | 92.956   |
| Total |           | 116823588 | 1240714 | 100.000 | 100.000  |

*(R)-1-(2-(4-acetylphenyl)naphthalen-1-yl)isoquinoline 2-oxide (3f)*

<sup>1</sup>H NMR (500 MHz)

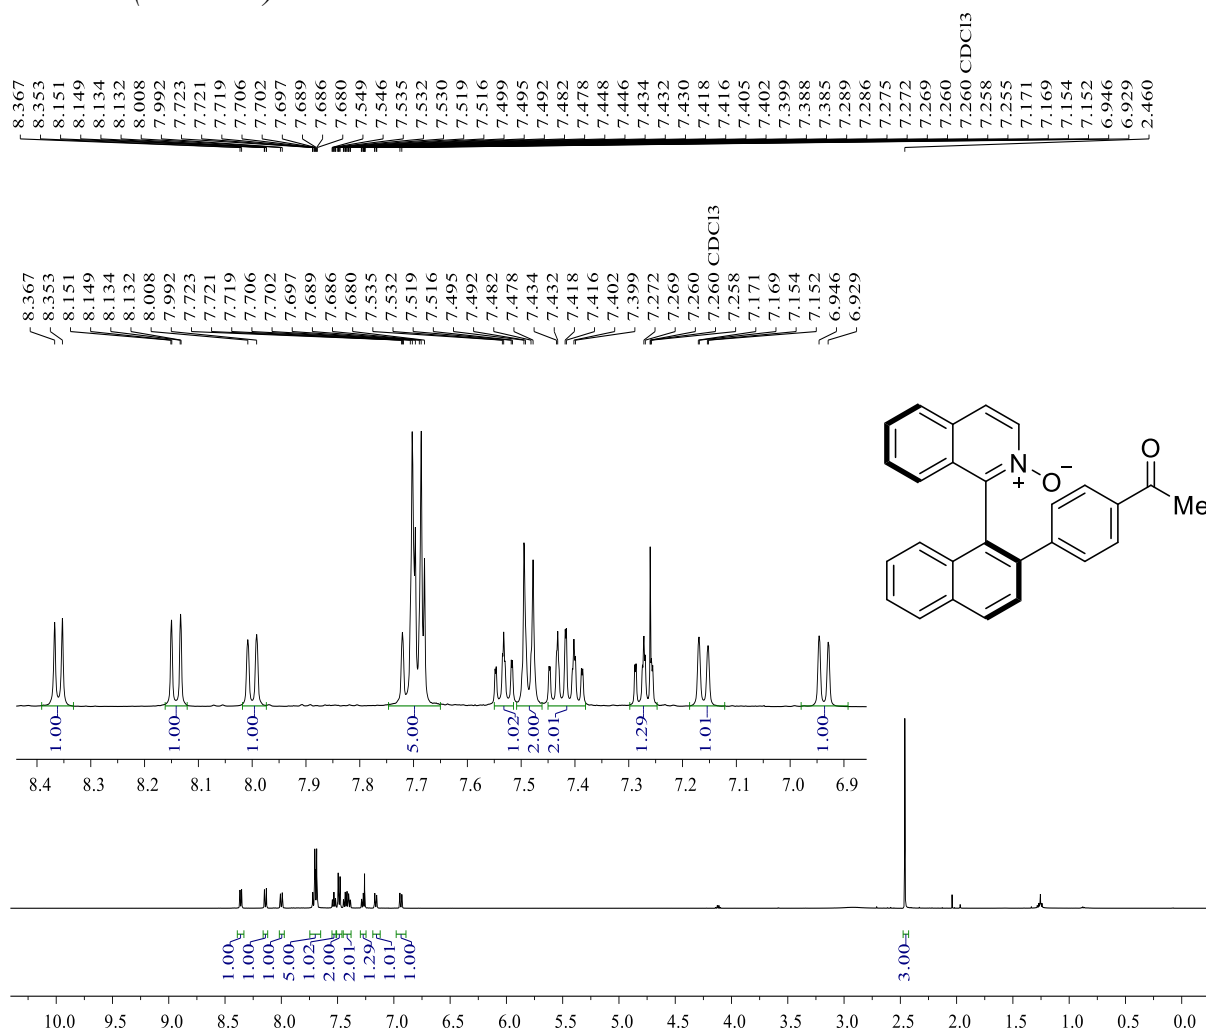

$^{13}\text{C}\{^1\text{H}\}$  NMR (125 MHz)

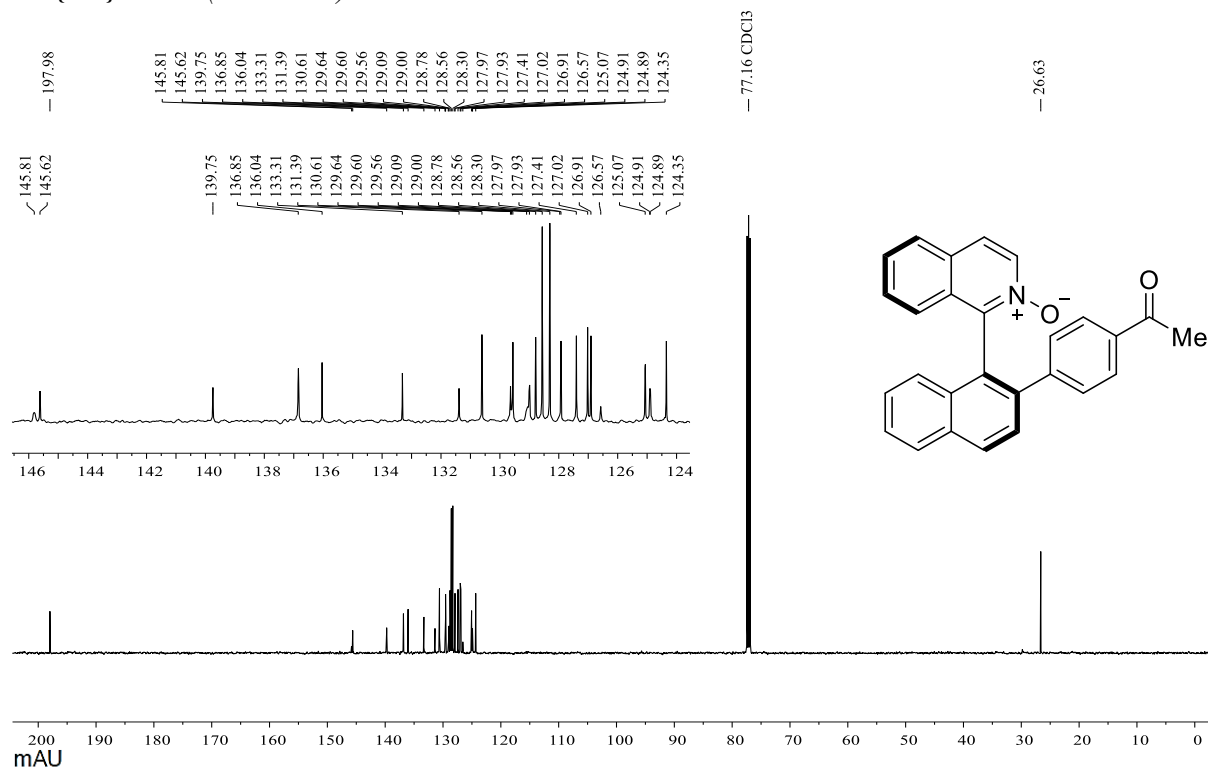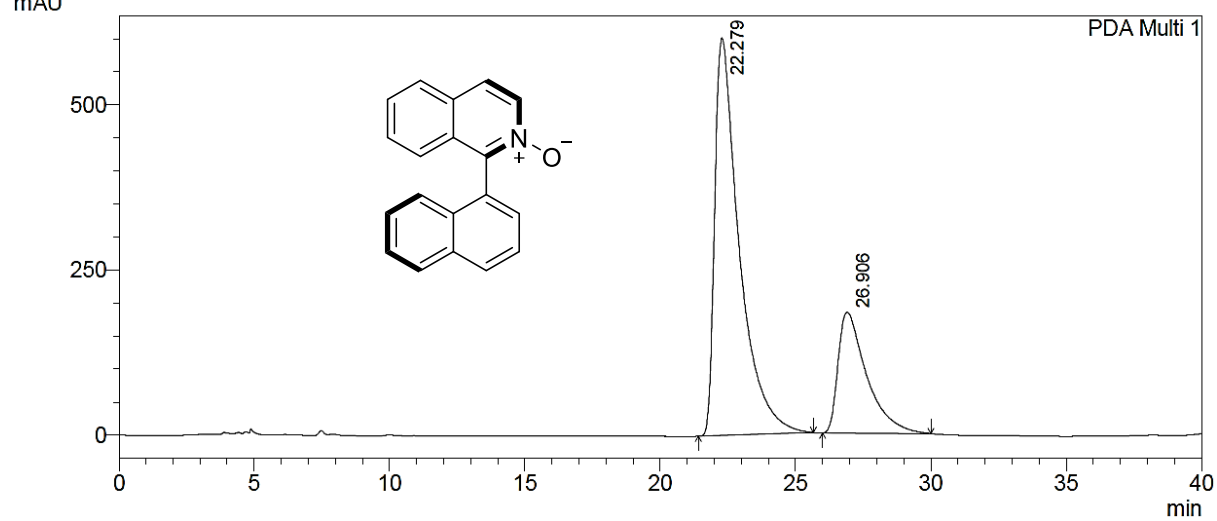

PDA Ch1 254nm 4mm

| Peak# | Ret. Time | Area     | Height | Area %  | Height % |
|-------|-----------|----------|--------|---------|----------|
| 1     | 22.279    | 37913747 | 601702 | 73.800  | 76.639   |
| 2     | 26.906    | 13460067 | 183406 | 26.200  | 23.361   |
| Total |           | 51373815 | 785108 | 100.000 | 100.000  |

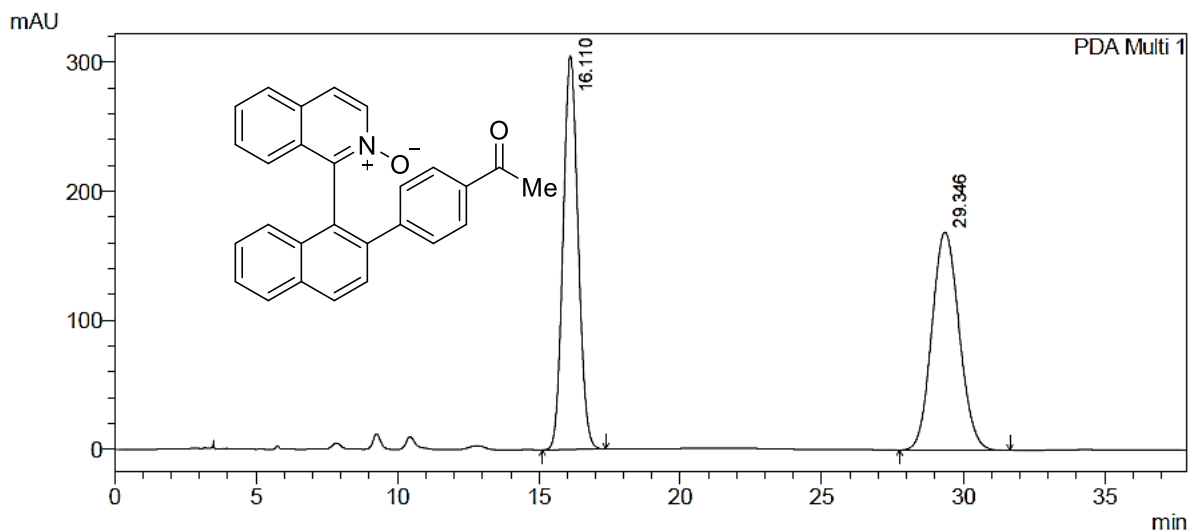

PDA Ch1 310nm 4mm

| Peak# | Ret. Time | Area     | Height | Area %  | Height % |
|-------|-----------|----------|--------|---------|----------|
| 1     | 16.110    | 11308354 | 305305 | 49.931  | 64.377   |
| 2     | 29.346    | 11339760 | 168941 | 50.069  | 35.623   |
| Total |           | 22648114 | 474246 | 100.000 | 100.000  |

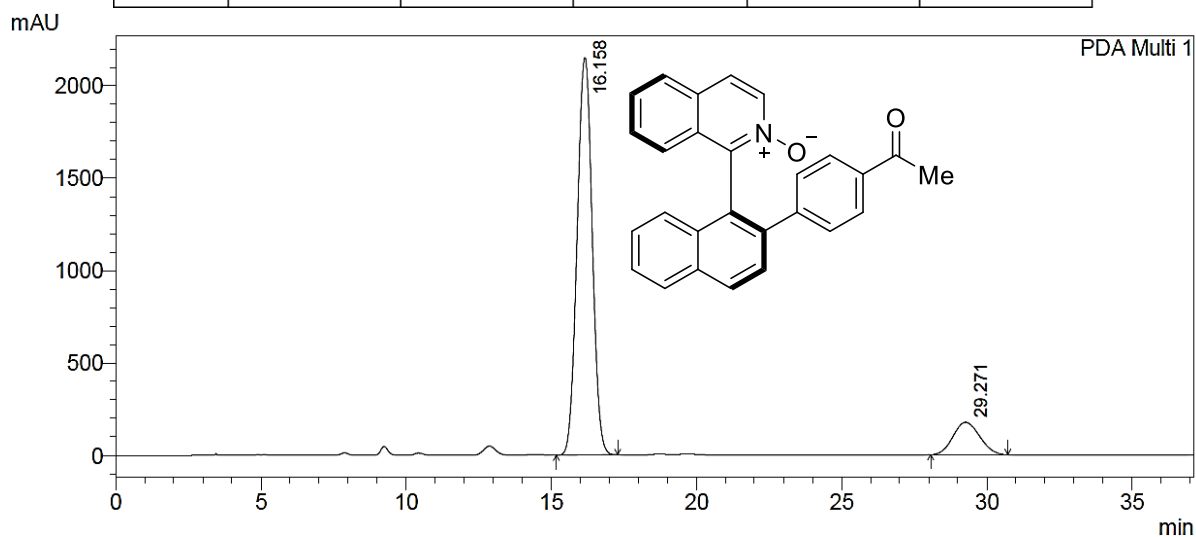

PDA Ch1 310nm 4mm

| Peak# | Ret. Time | Area     | Height  | Area %  | Height % |
|-------|-----------|----------|---------|---------|----------|
| 1     | 16.158    | 77205314 | 2149194 | 87.259  | 92.428   |
| 2     | 29.271    | 11272989 | 176078  | 12.741  | 7.572    |
| Total |           | 88478303 | 2325272 | 100.000 | 100.000  |

*(R)*-1-(2-(4-nitrophenyl)naphthalen-1-yl)isoquinoline 2-oxide (**3g**)

<sup>1</sup>H NMR (500 MHz)

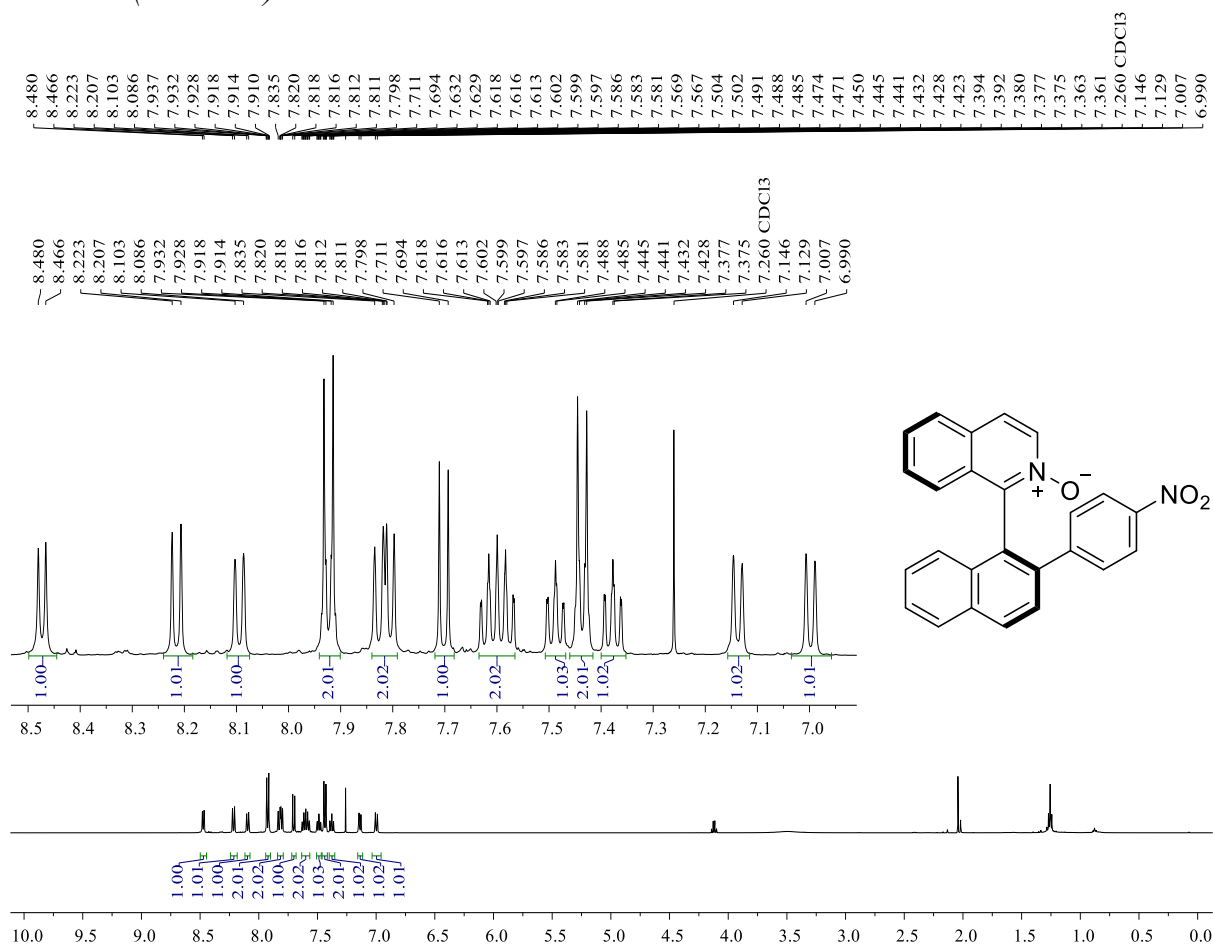

<sup>13</sup>C NMR (125 MHz)

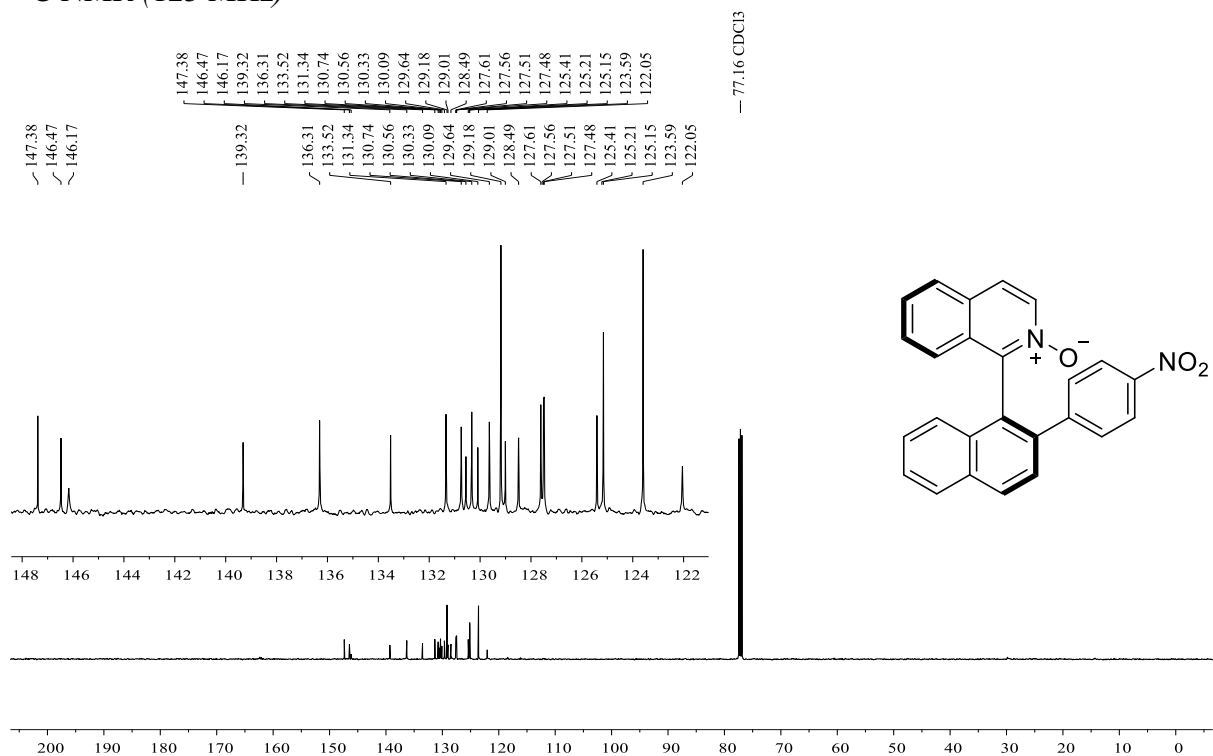

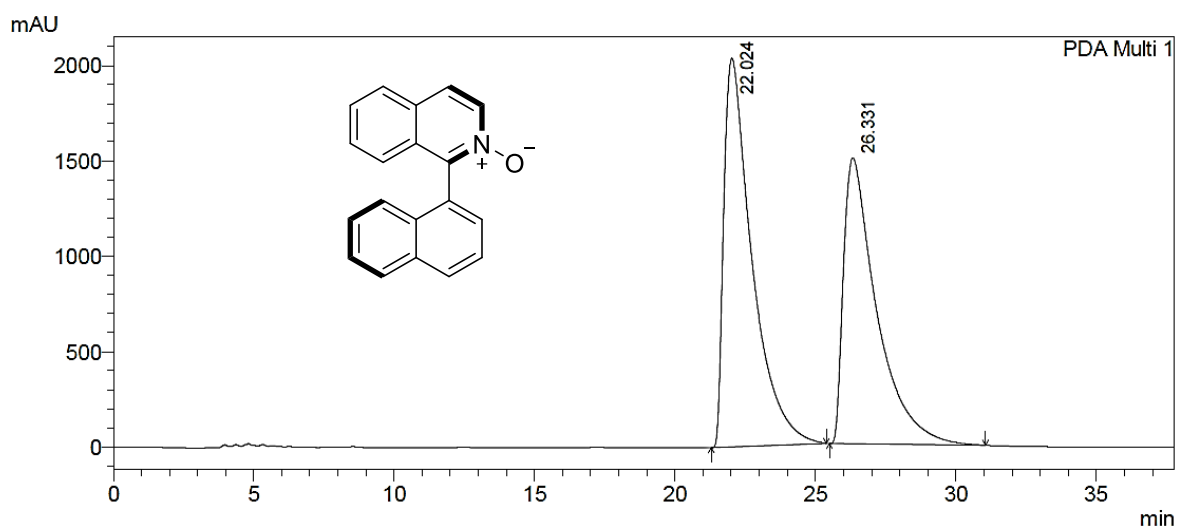

PDA Ch1 254nm 4nm

| Peak# | Ret. Time | Area      | Height  | Area %  | Height % |
|-------|-----------|-----------|---------|---------|----------|
| 1     | 22.024    | 141404456 | 2036570 | 53.375  | 57.581   |
| 2     | 26.331    | 123522253 | 1500294 | 46.625  | 42.419   |
| Total |           | 264926709 | 3536864 | 100.000 | 100.000  |

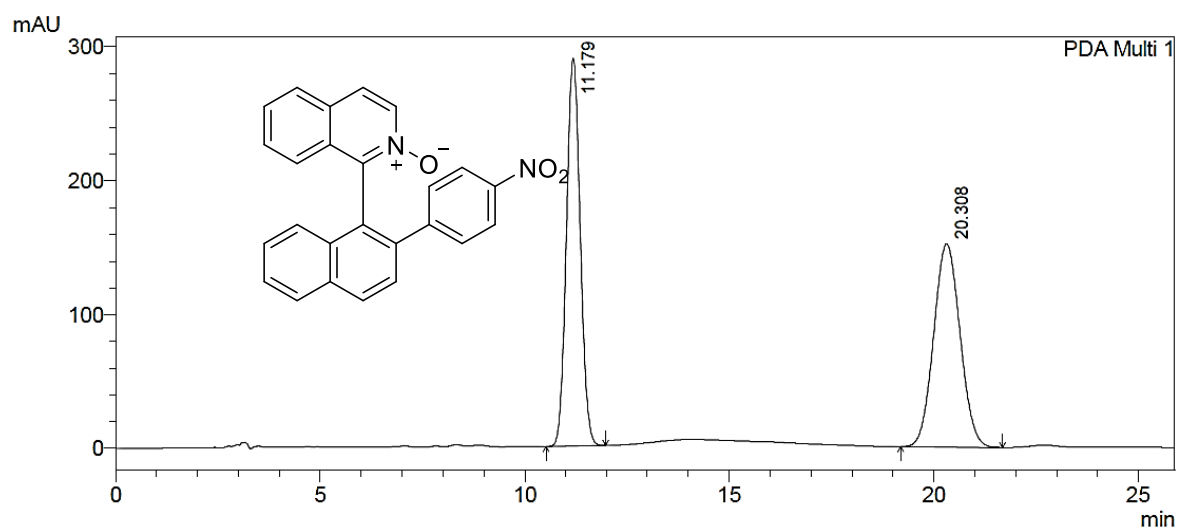

PDA Ch1 310nm 4nm

| Peak# | Ret. Time | Area     | Height | Area %  | Height % |
|-------|-----------|----------|--------|---------|----------|
| 1     | 11.179    | 6794856  | 289502 | 49.997  | 65.631   |
| 2     | 20.308    | 6795716  | 151607 | 50.003  | 34.369   |
| Total |           | 13590572 | 441109 | 100.000 | 100.000  |

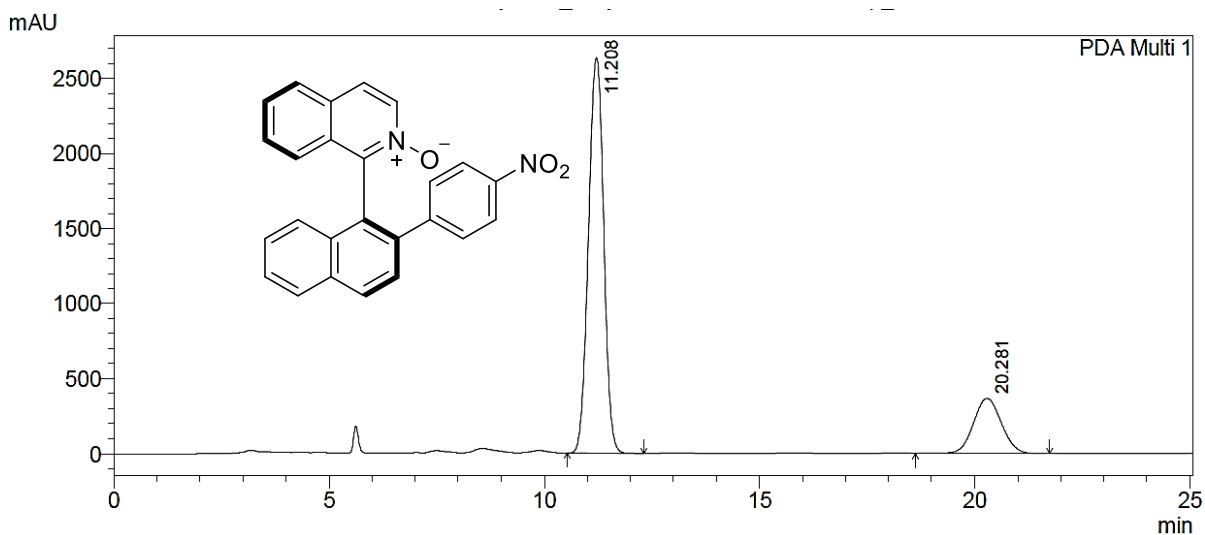

PDA Ch1 310nm 4nm

| Peak# | Ret. Time | Area     | Height  | Area %  | Height % |
|-------|-----------|----------|---------|---------|----------|
| 1     | 11.208    | 65121169 | 2634096 | 79.629  | 87.757   |
| 2     | 20.281    | 16659594 | 367477  | 20.371  | 12.243   |
| Total |           | 81780762 | 3001572 | 100.000 | 100.000  |

*(R)-1-(2-(4-(trifluoromethyl)phenyl)naphthalen-1-yl)isoquinoline 2-oxide (3h)*  
<sup>1</sup>H NMR (500 MHz)

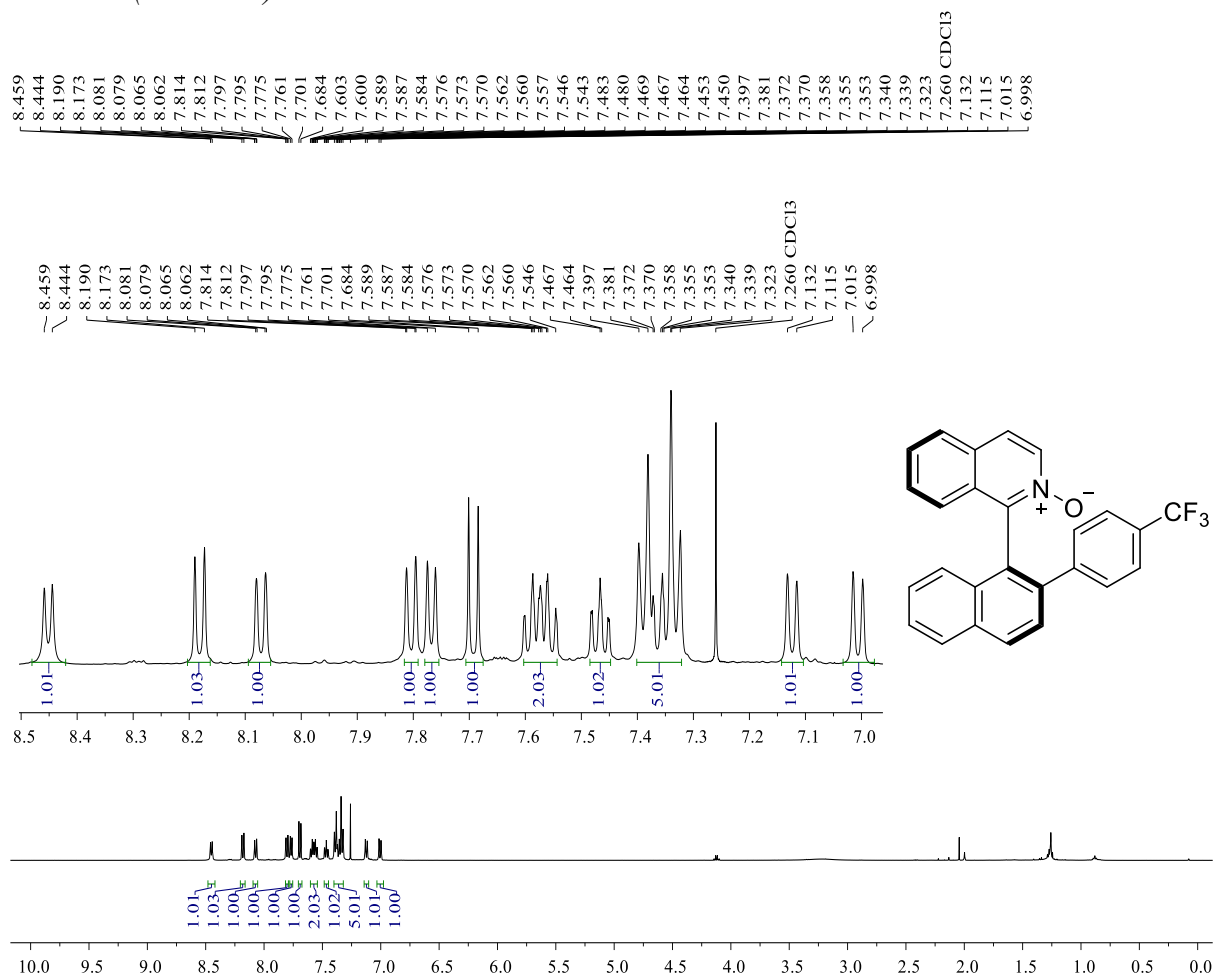

$^{13}\text{C}\{^1\text{H}\}$  NMR (125 MHz)

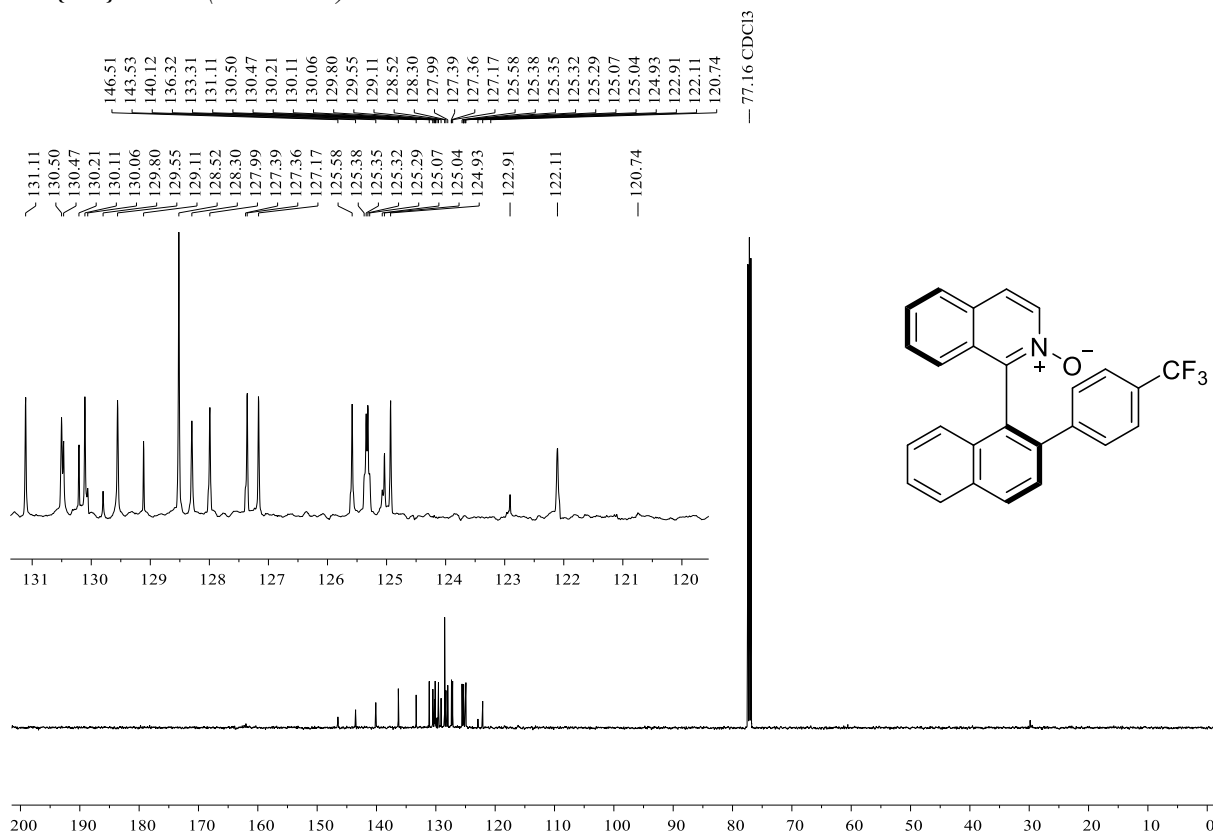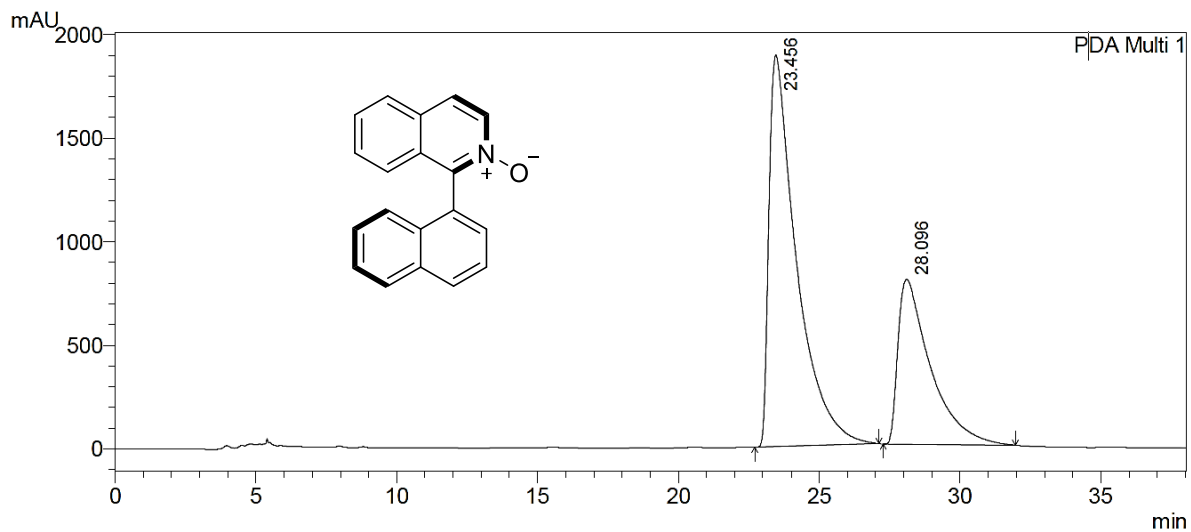

PDA Ch1 254nm 4nm

| Peak# | Ret. Time | Area      | Height  | Area %  | Height % |
|-------|-----------|-----------|---------|---------|----------|
| 1     | 23.456    | 128401460 | 1888691 | 66.883  | 70.379   |
| 2     | 28.096    | 63577158  | 794924  | 33.117  | 29.621   |
| Total |           | 191978618 | 2683615 | 100.000 | 100.000  |



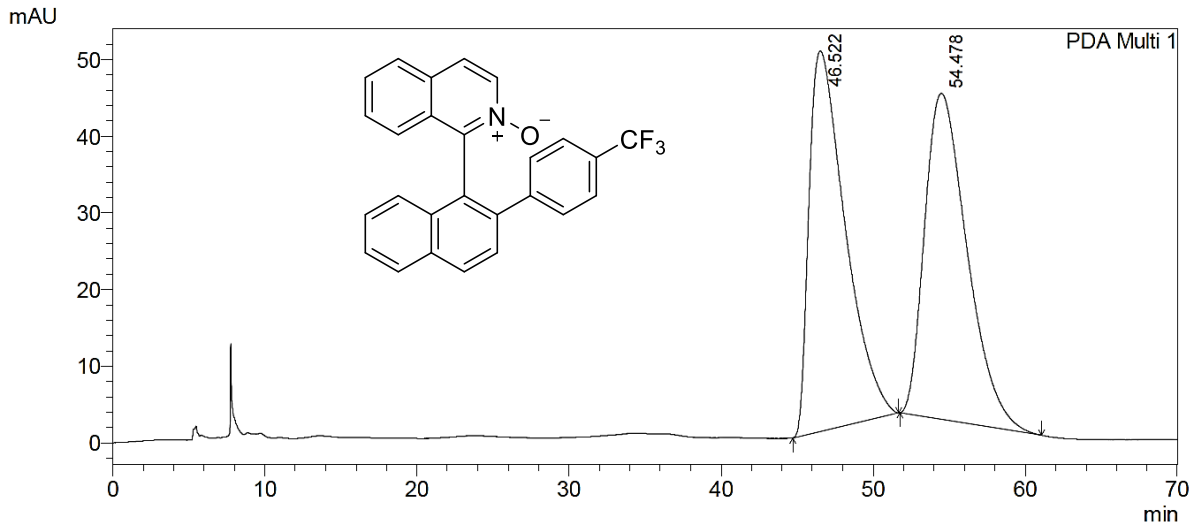

PDA Ch1 310mm 4mm

| Peak# | Ret. Time | Area     | Height | Area %  | Height % |
|-------|-----------|----------|--------|---------|----------|
| 1     | 46.522    | 8209203  | 49682  | 49.748  | 53.840   |
| 2     | 54.478    | 8292236  | 42595  | 50.252  | 46.160   |
| Total |           | 16501438 | 92277  | 100.000 | 100.000  |

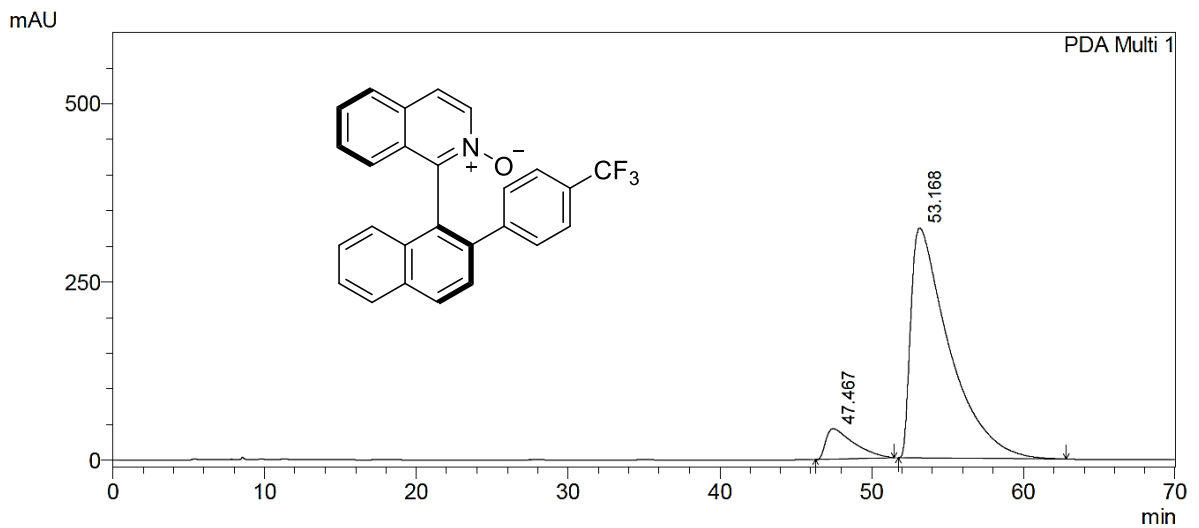

PDA Ch1 310mm 4mm

| Peak# | Ret. Time | Area     | Height | Area %  | Height % |
|-------|-----------|----------|--------|---------|----------|
| 1     | 47.467    | 5469820  | 42928  | 8.798   | 11.734   |
| 2     | 53.168    | 56704244 | 322911 | 91.202  | 88.266   |
| Total |           | 62174065 | 365840 | 100.000 | 100.000  |

*(R)*-1-(2-(4-acetoxyphenyl)naphthalen-1-yl)isoquinoline 2-oxide (**3i**)

<sup>1</sup>H NMR (500 MHz)

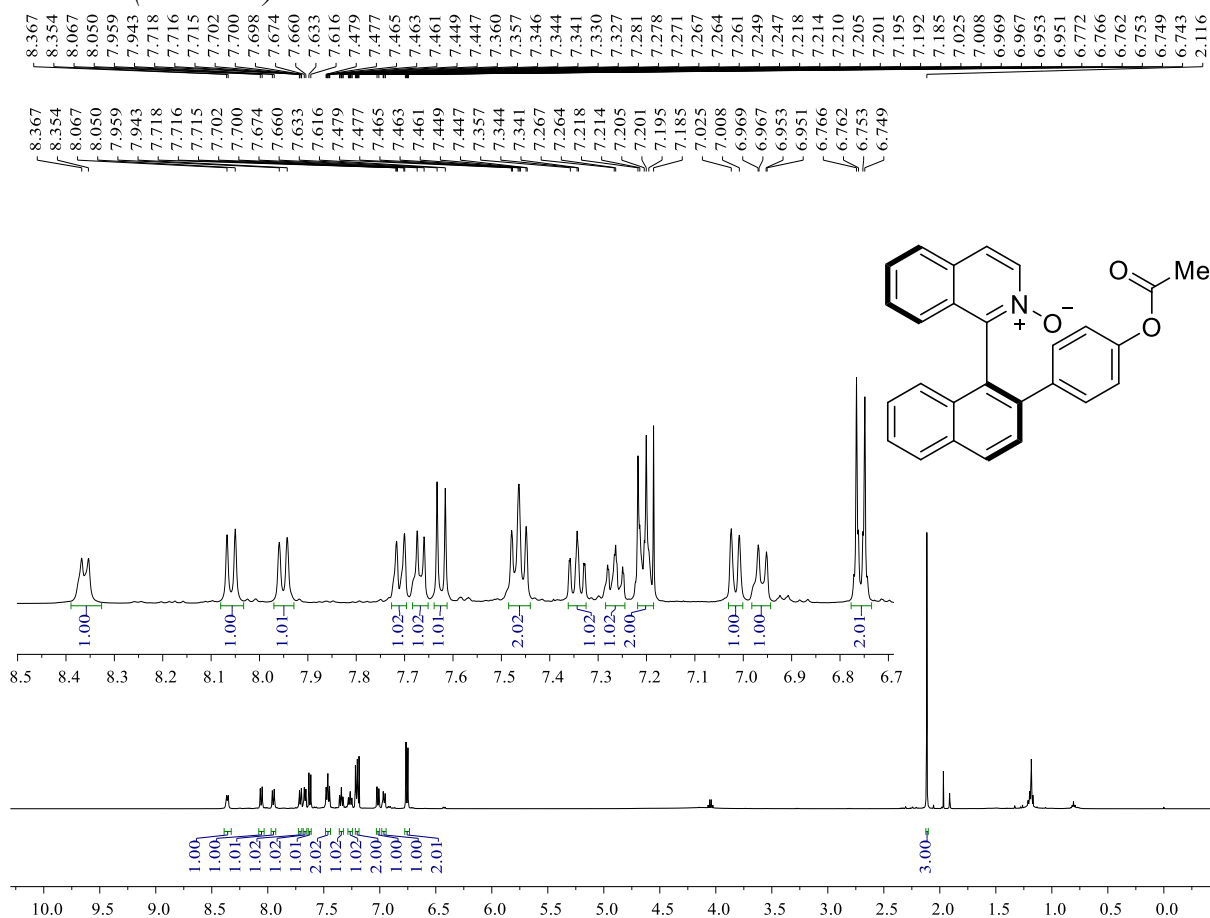

<sup>13</sup>C{<sup>1</sup>H} NMR (125 MHz)

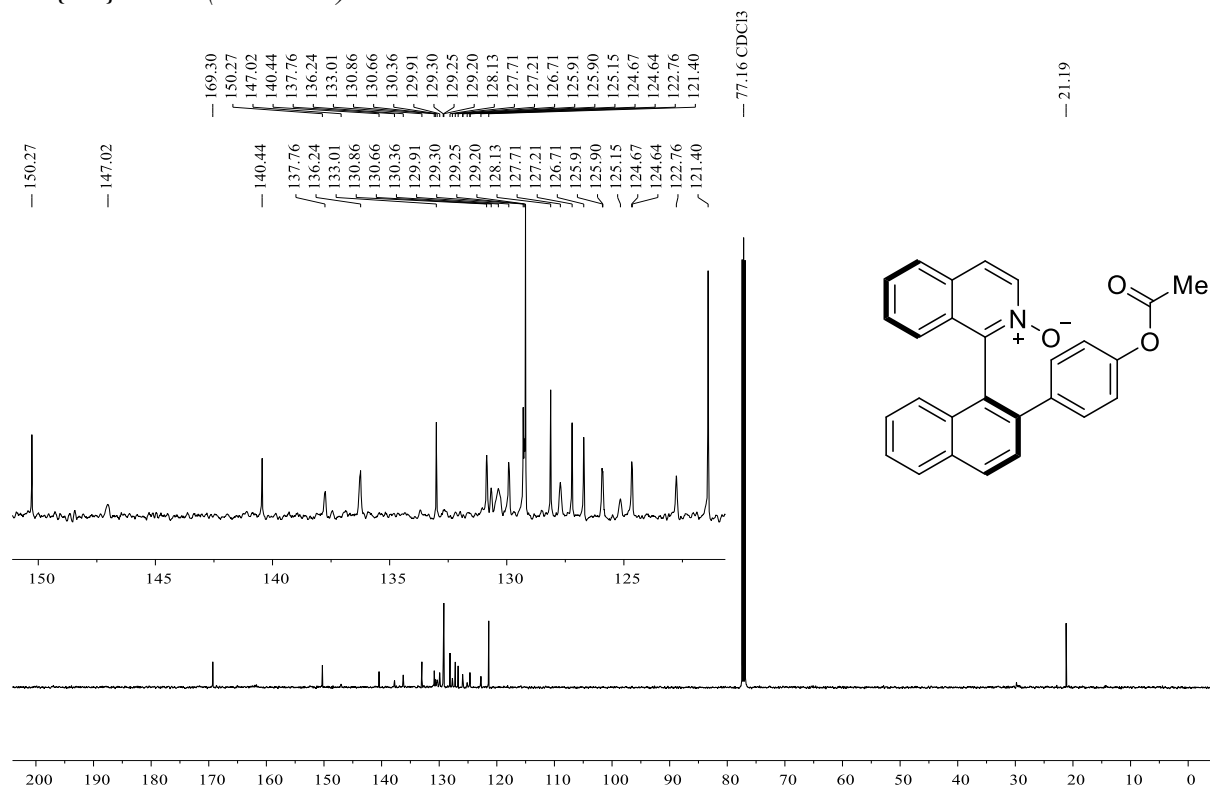

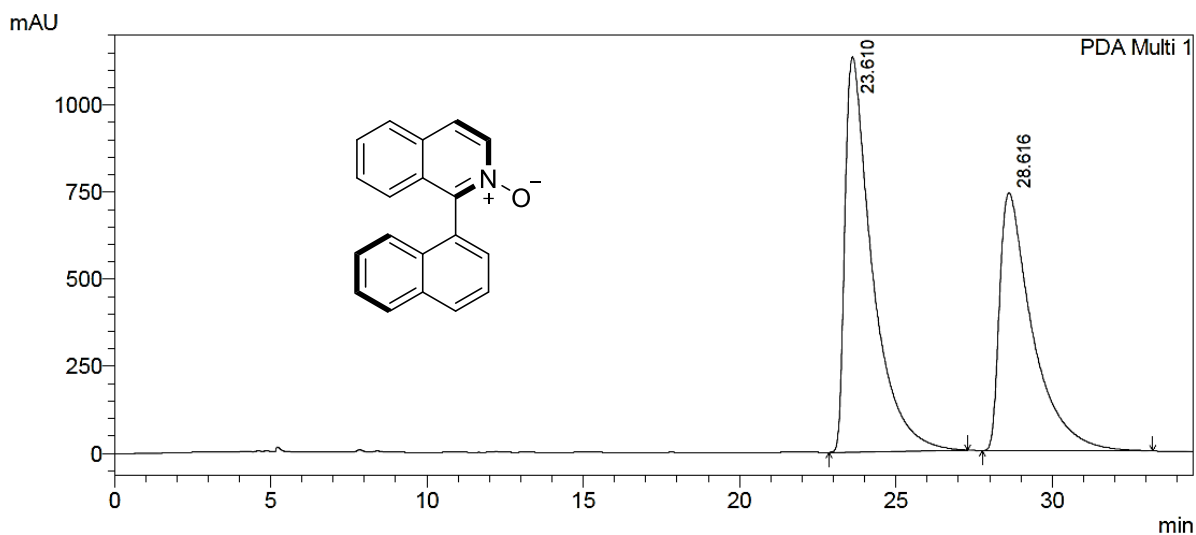

PDA Ch1 254nm 4nm

| Peak# | Ret. Time | Area      | Height  | Area %  | Height % |
|-------|-----------|-----------|---------|---------|----------|
| 1     | 23.610    | 68670185  | 1133552 | 56.022  | 60.507   |
| 2     | 28.616    | 53906809  | 739871  | 43.978  | 39.493   |
| Total |           | 122576994 | 1873423 | 100.000 | 100.000  |

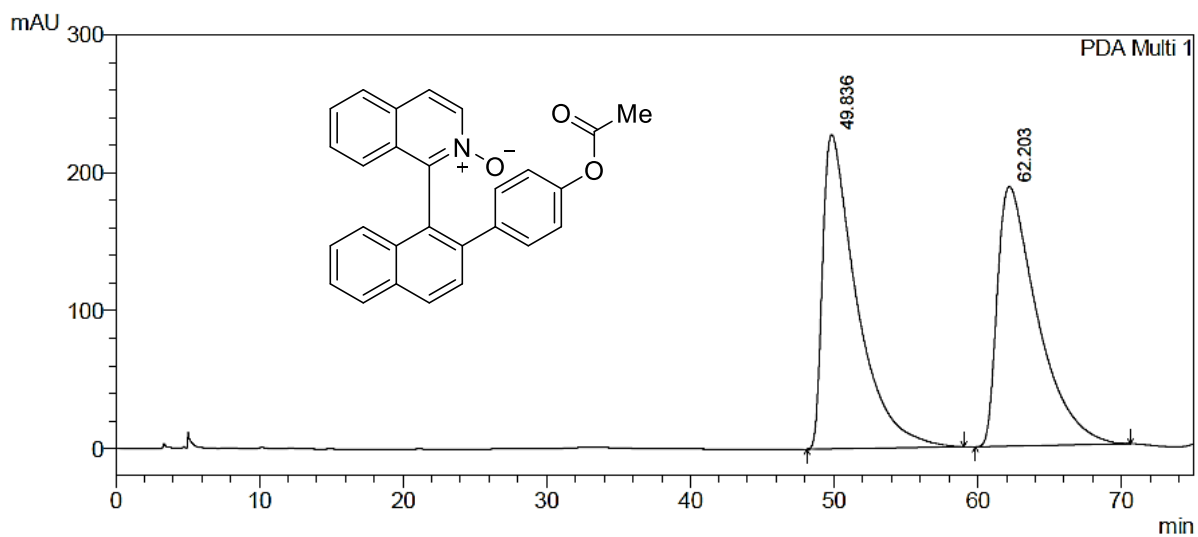

PDA Ch1 254nm 4nm

| Peak# | Ret. Time | Area     | Height | Area %  | Height % |
|-------|-----------|----------|--------|---------|----------|
| 1     | 49.836    | 37542546 | 227970 | 50.617  | 54.711   |
| 2     | 62.203    | 36627683 | 188710 | 49.383  | 45.289   |
| Total |           | 74170229 | 416681 | 100.000 | 100.000  |

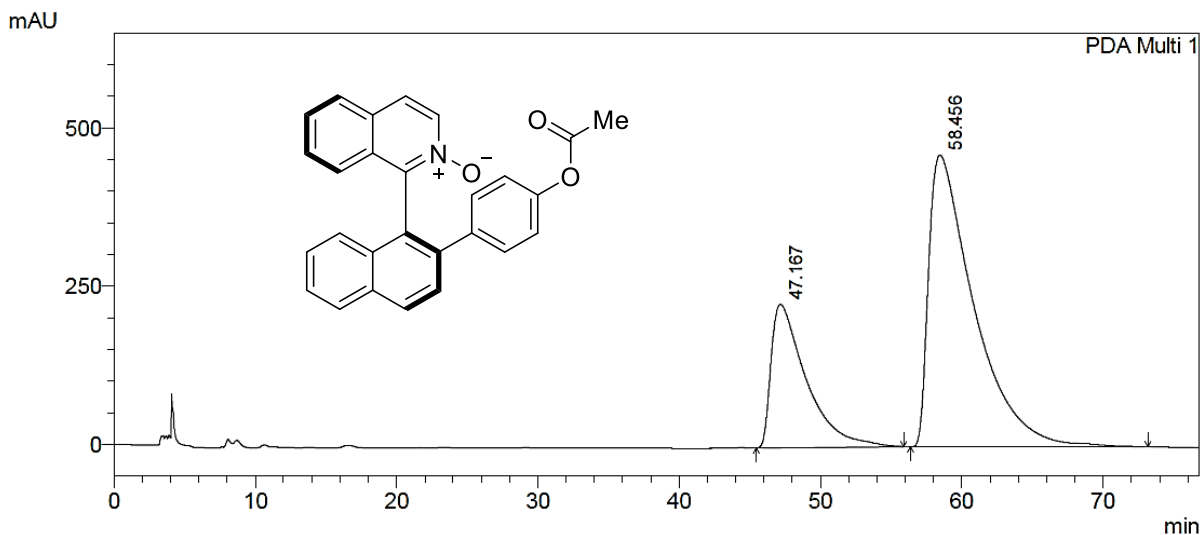

PDA Ch1 254nm 4mm

| Peak# | Ret. Time | Area      | Height | Area %  | Height % |
|-------|-----------|-----------|--------|---------|----------|
| 1     | 47.167    | 39258884  | 226583 | 27.696  | 32.950   |
| 2     | 58.456    | 102491204 | 461067 | 72.304  | 67.050   |
| Total |           | 141750087 | 687650 | 100.000 | 100.000  |

*(R)*-1-(2-(*m*-tolyl)naphthalen-1-yl)isoquinoline 2-oxide (**3j**)

<sup>1</sup>H NMR (500 MHz)

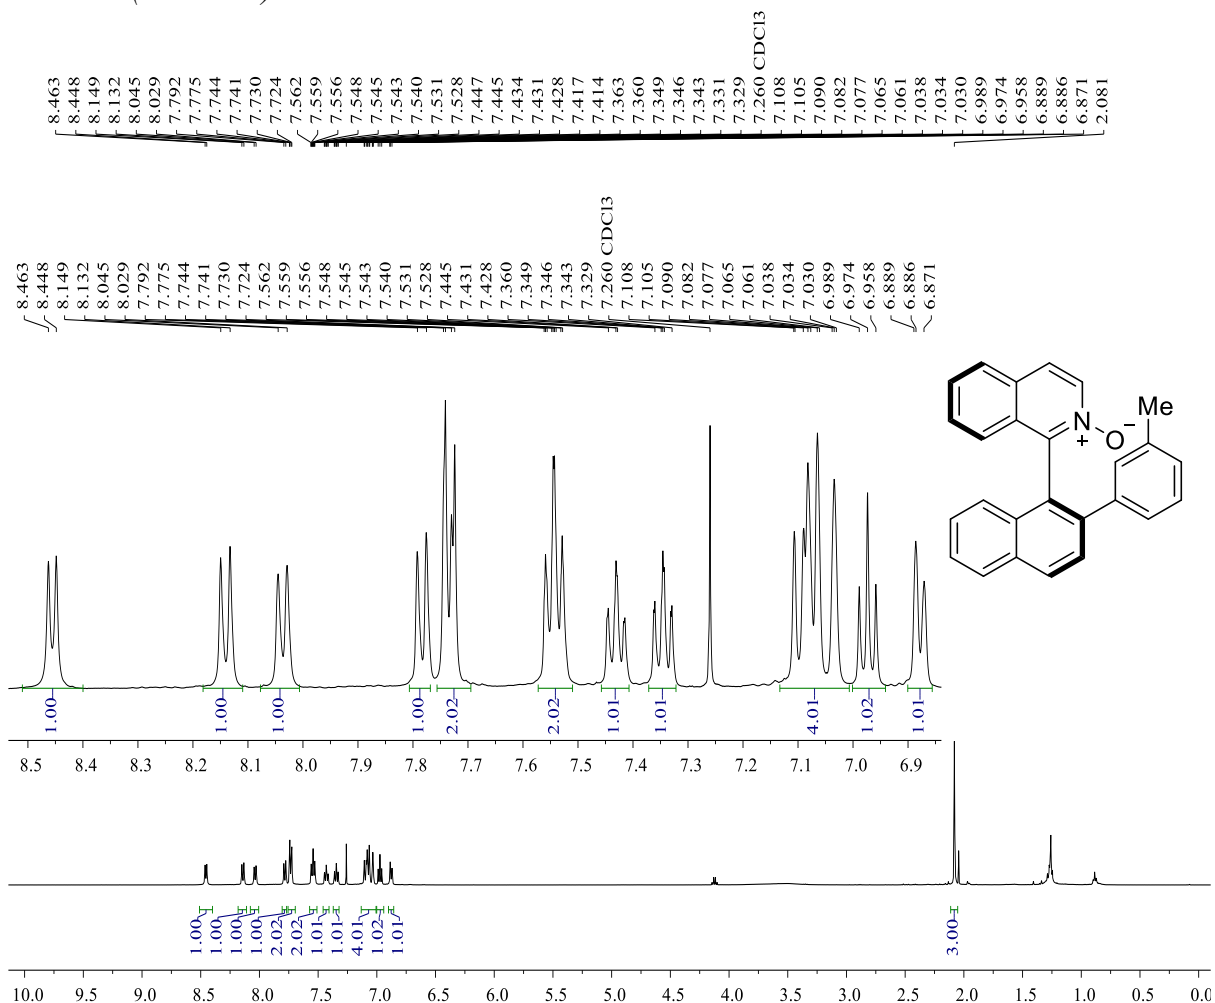

<sup>13</sup>C NMR (125 MHz)

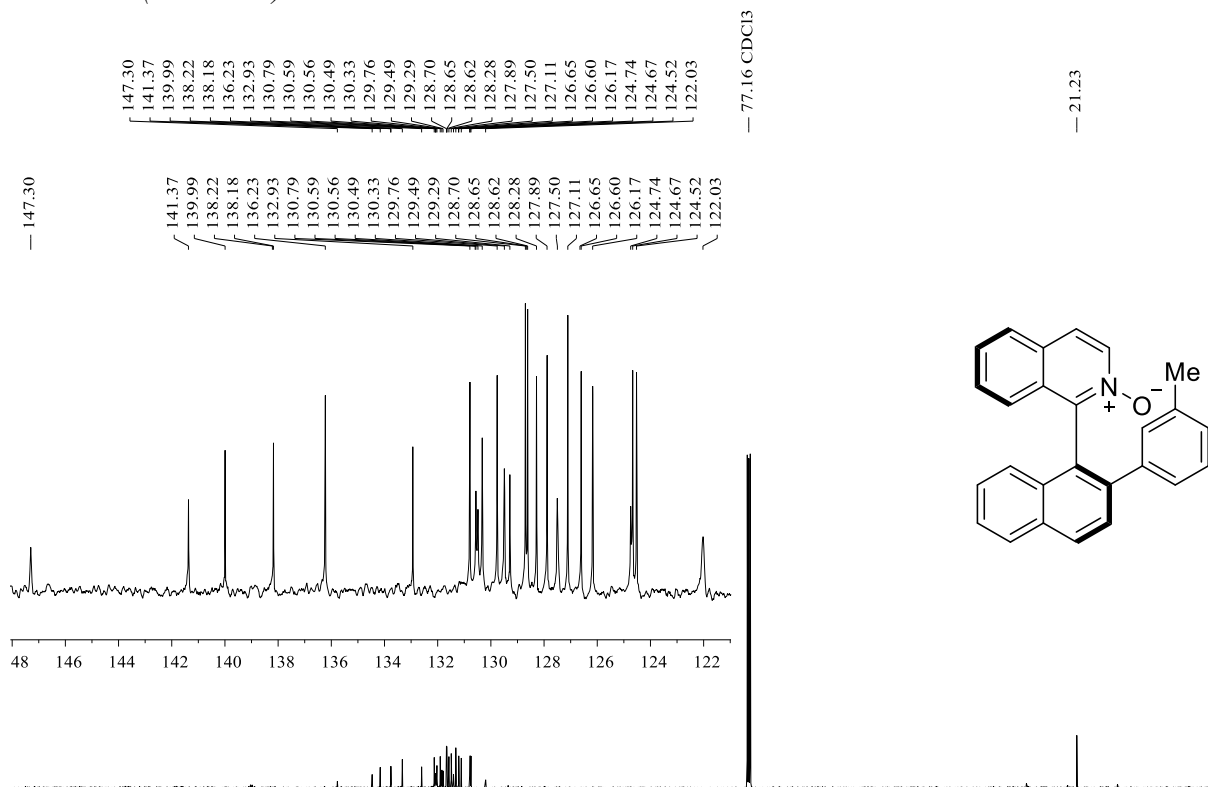

200 190 180 170 160 150 140 130 120 110 100 90 80 70 60 50 40 30 20 10 0

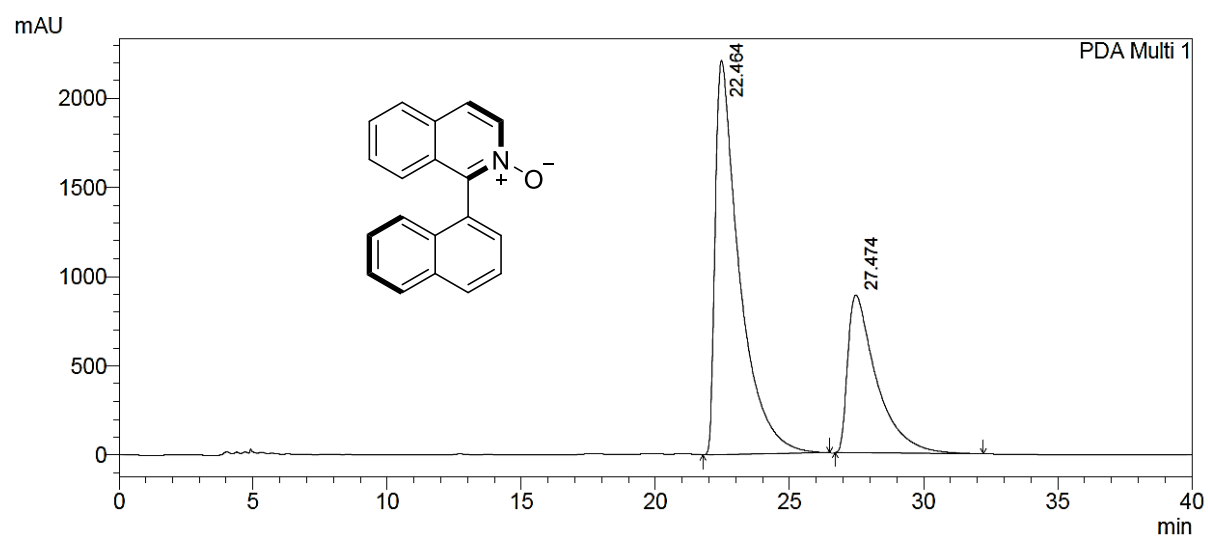

PDA Ch1 254nm 4nm

| Peak# | Ret. Time | Area      | Height  | Area %  | Height % |
|-------|-----------|-----------|---------|---------|----------|
| 1     | 22.464    | 138092014 | 2207606 | 67.605  | 71.395   |
| 2     | 27.474    | 66169949  | 884488  | 32.395  | 28.605   |
| Total |           | 204261963 | 3092094 | 100.000 | 100.000  |

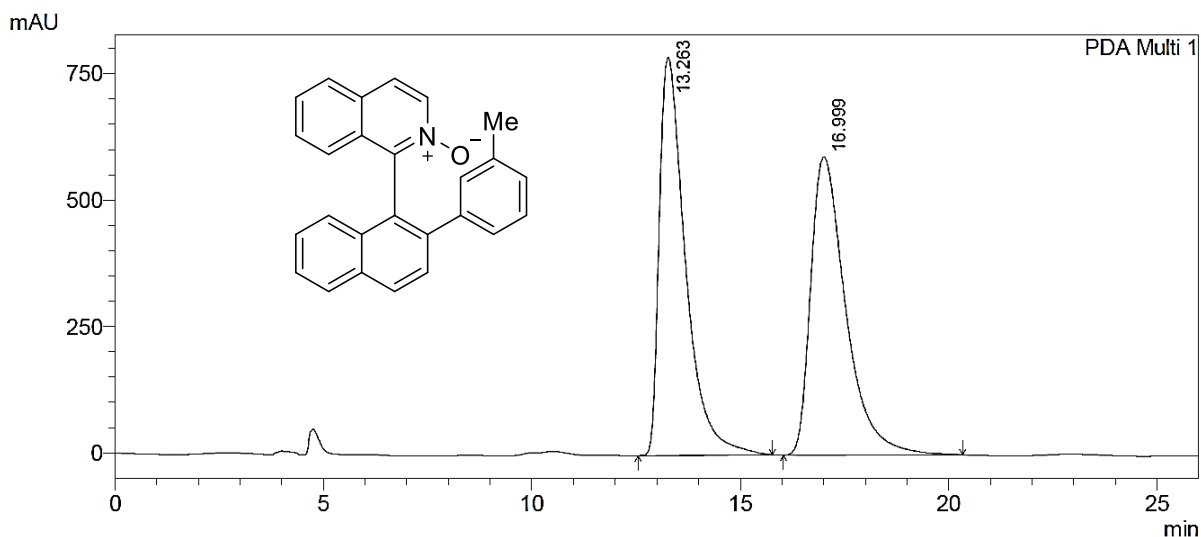

PDA Ch1 254nm 4nm

| Peak# | Ret. Time | Area     | Height  | Area %  | Height % |
|-------|-----------|----------|---------|---------|----------|
| 1     | 13.263    | 34306626 | 786220  | 49.898  | 57.162   |
| 2     | 16.999    | 34446661 | 589204  | 50.102  | 42.838   |
| Total |           | 68753287 | 1375425 | 100.000 | 100.000  |

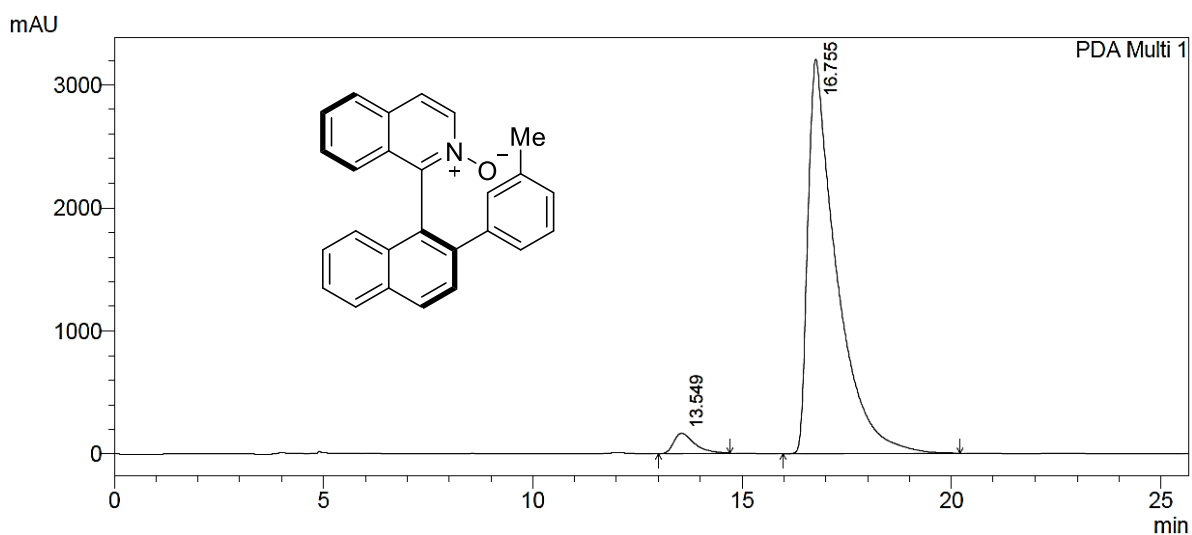

PDA Ch1 254nm 4nm

| Peak# | Ret. Time | Area      | Height  | Area %  | Height % |
|-------|-----------|-----------|---------|---------|----------|
| 1     | 13.549    | 5634305   | 163643  | 3.584   | 4.863    |
| 2     | 16.755    | 151575237 | 3201678 | 96.416  | 95.137   |
| Total |           | 157209542 | 3365322 | 100.000 | 100.000  |

*(R)*-1-(2-(3-methoxyphenyl)naphthalen-1-yl)isoquinoline 2-oxide (**3k**)

<sup>1</sup>H NMR (500 MHz)

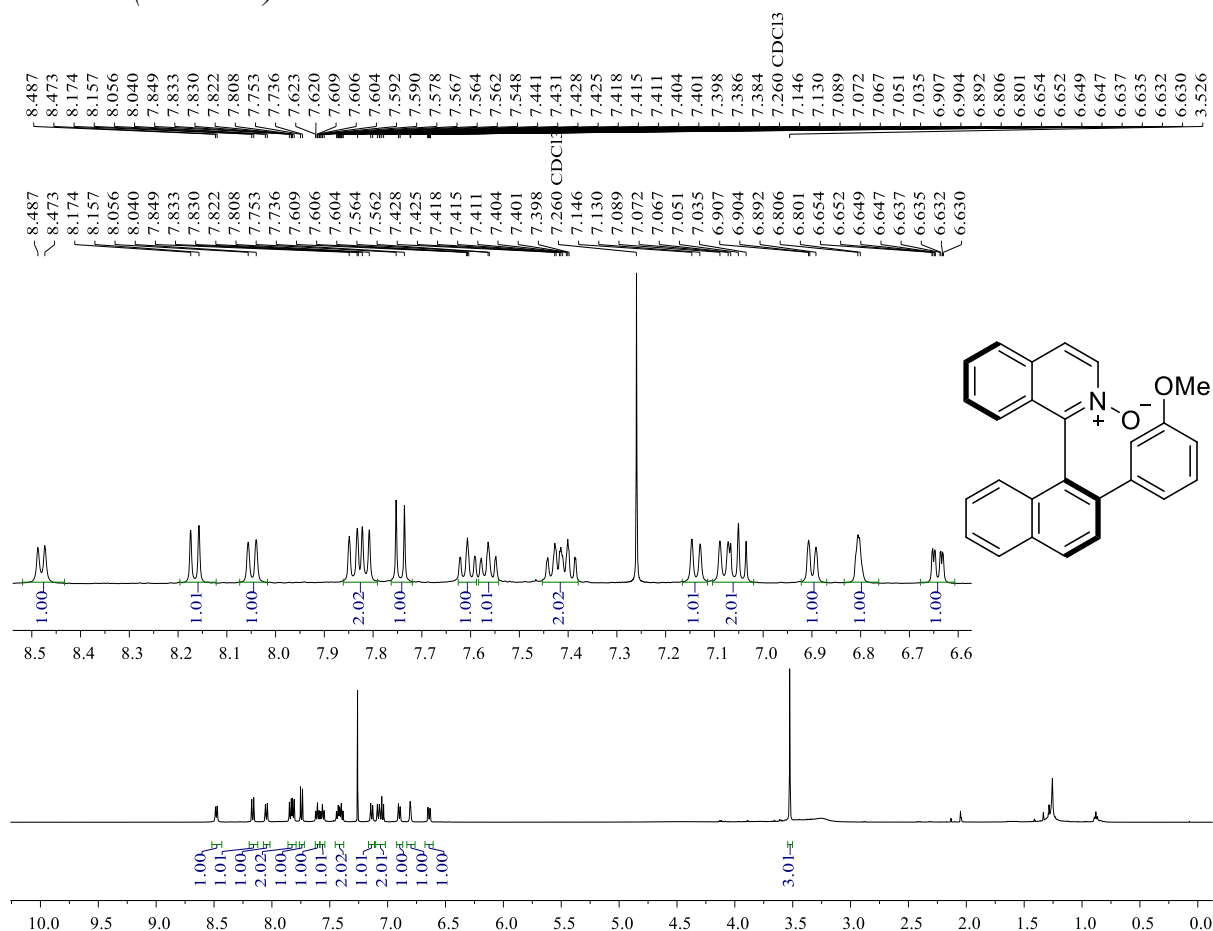

<sup>13</sup>C NMR (125 MHz)

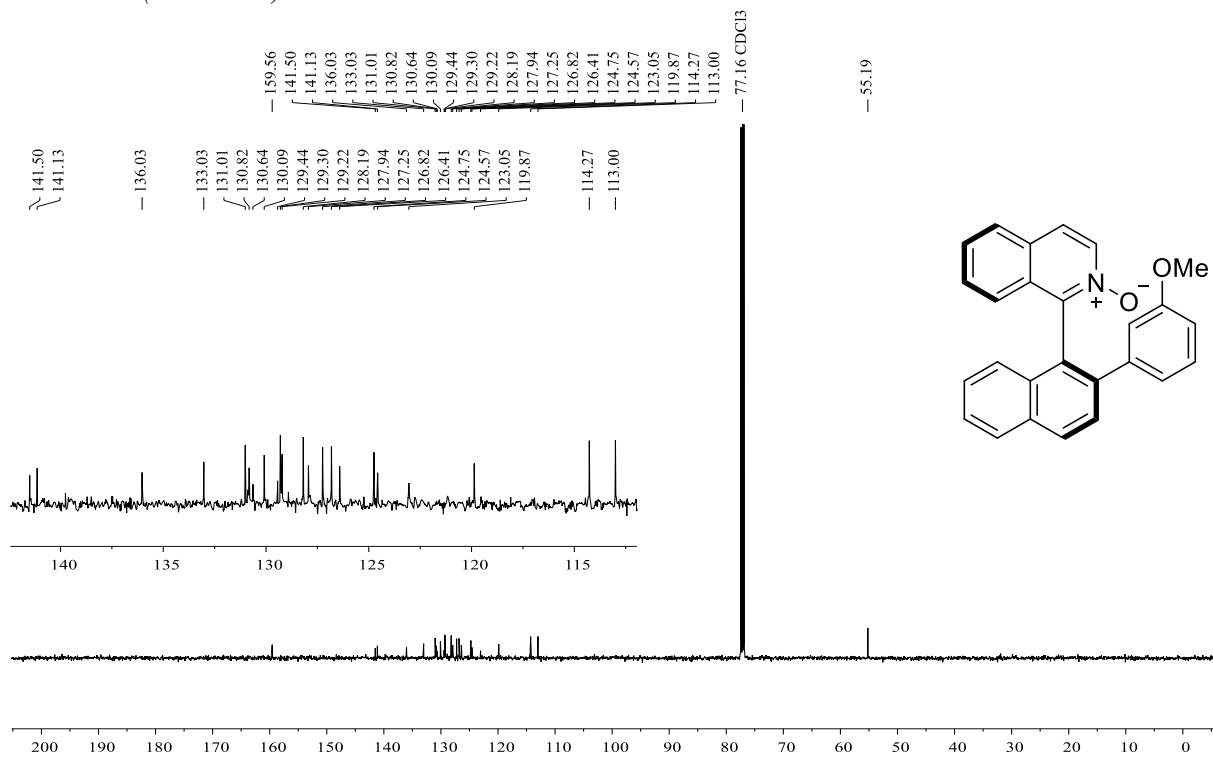

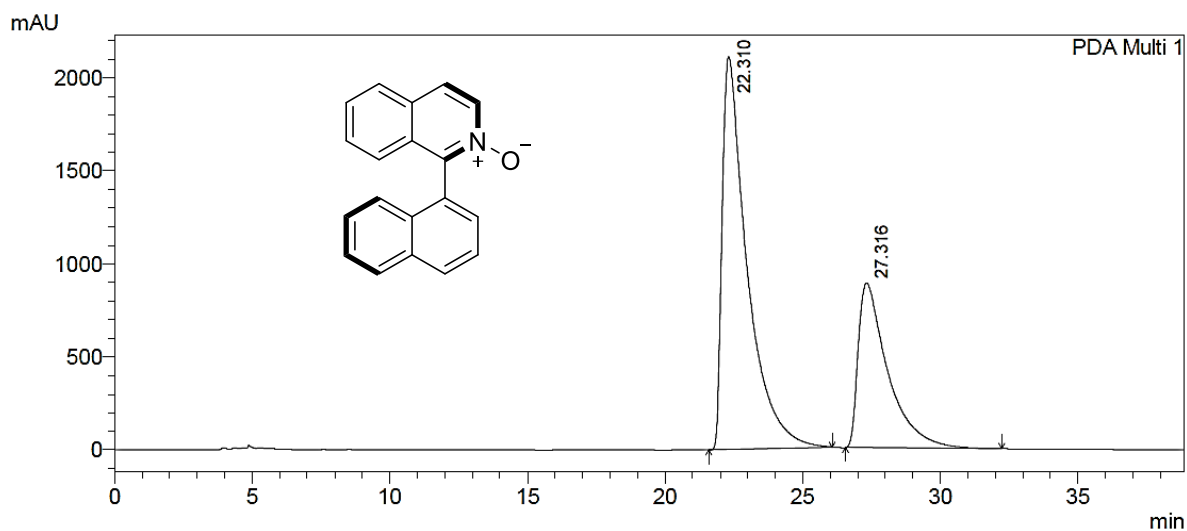

PDA Ch1 254nm 4mm

| Peak# | Ret. Time | Area      | Height  | Area %  | Height % |
|-------|-----------|-----------|---------|---------|----------|
| 1     | 22.310    | 132418046 | 2110796 | 66.658  | 70.456   |
| 2     | 27.316    | 66234766  | 885093  | 33.342  | 29.544   |
| Total |           | 198652812 | 2995889 | 100.000 | 100.000  |

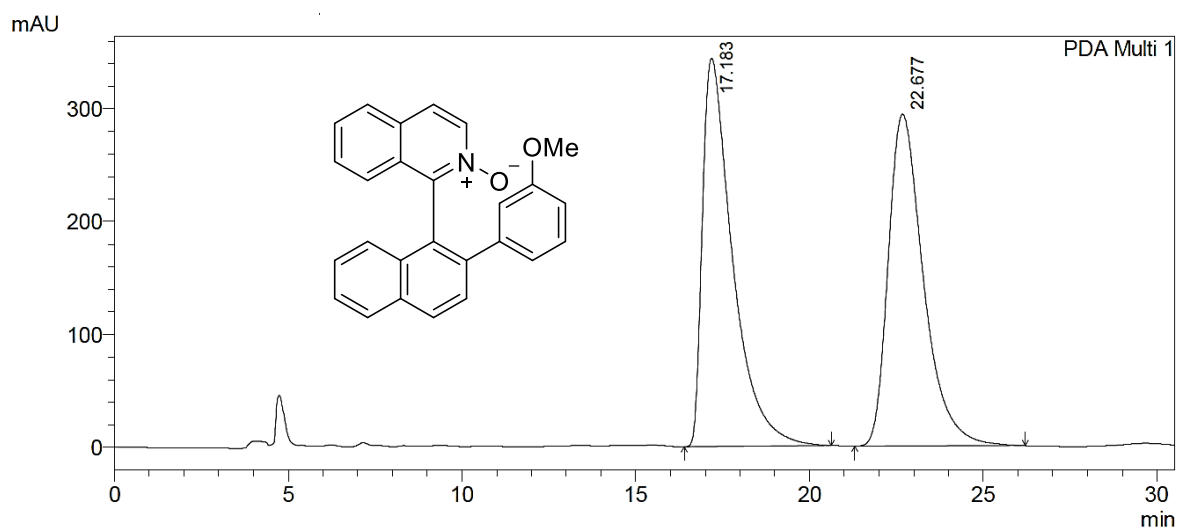

PDA Ch1 254nm 4mm

| Peak# | Ret. Time | Area     | Height | Area %  | Height % |
|-------|-----------|----------|--------|---------|----------|
| 1     | 17.183    | 20746899 | 344044 | 50.018  | 53.909   |
| 2     | 22.677    | 20732117 | 294155 | 49.982  | 46.091   |
| Total |           | 41479015 | 638199 | 100.000 | 100.000  |



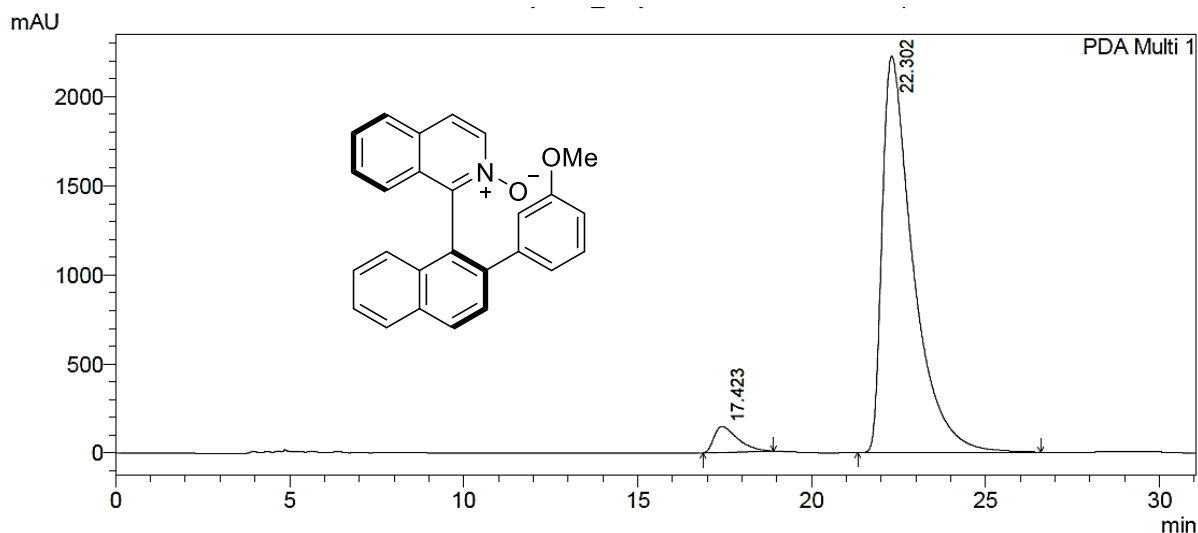

PDA Ch1 254nm 4mm

| Peak# | Ret. Time | Area      | Height  | Area %  | Height % |
|-------|-----------|-----------|---------|---------|----------|
| 1     | 17.423    | 6860954   | 144741  | 4.763   | 6.111    |
| 2     | 22.302    | 137175288 | 2223928 | 95.237  | 93.889   |
| Total |           | 144036241 | 2368669 | 100.000 | 100.000  |

*(R)*-1-(2-(3-methoxyphenyl)naphthalen-1-yl)isoquinoline 2-oxide (**31**)

<sup>1</sup>H NMR (600 MHz)

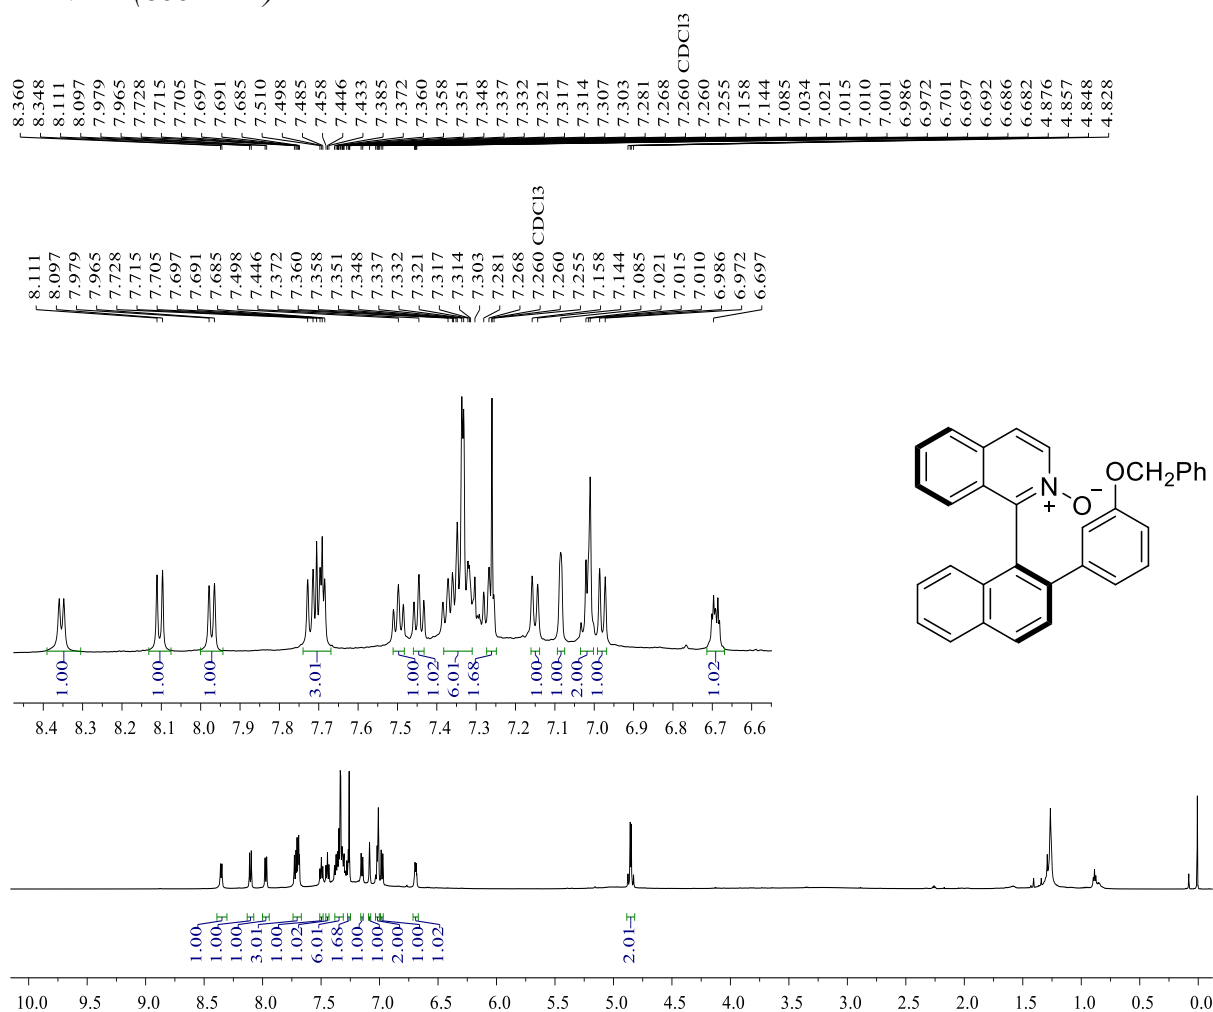

<sup>13</sup>C NMR (150 MHz)

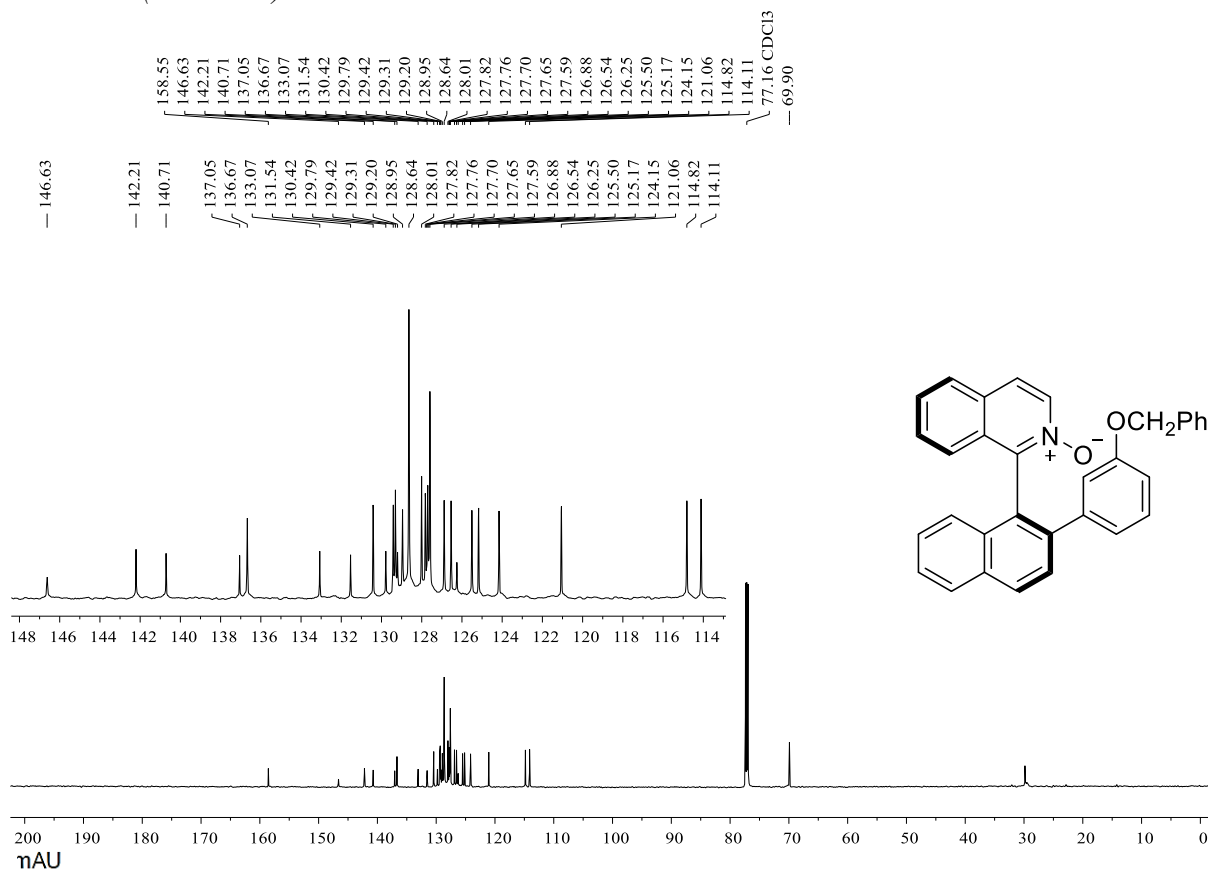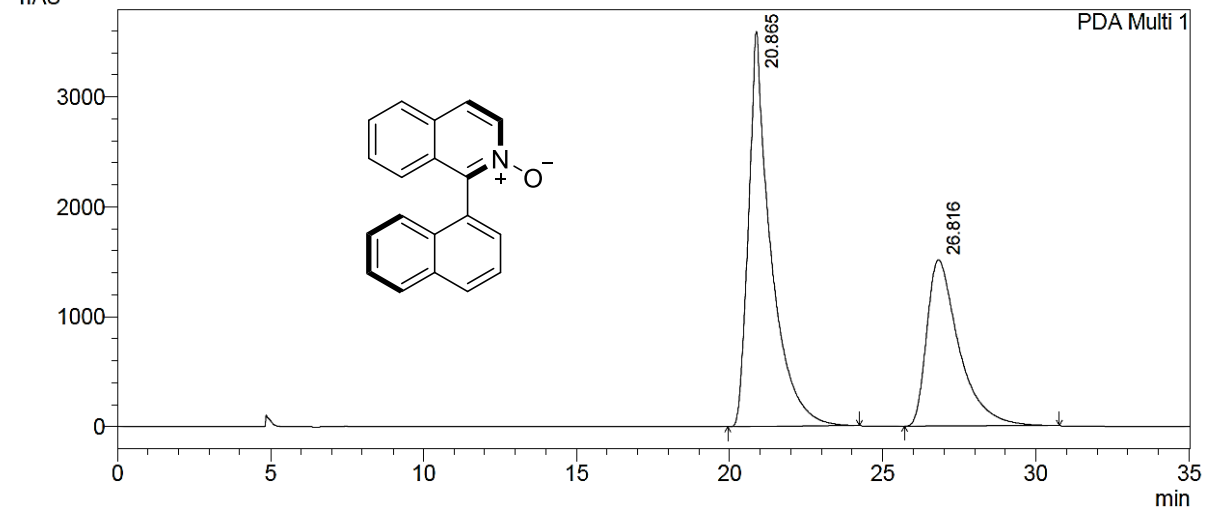

PDA Ch1 254nm 4nm

| Peak# | Ret. Time | Area      | Height  | Area %  | Height % |
|-------|-----------|-----------|---------|---------|----------|
| 1     | 20.865    | 179922011 | 3591007 | 61.846  | 70.353   |
| 2     | 26.816    | 110997357 | 1513229 | 38.154  | 29.647   |
| Total |           | 290919368 | 5104235 | 100.000 | 100.000  |

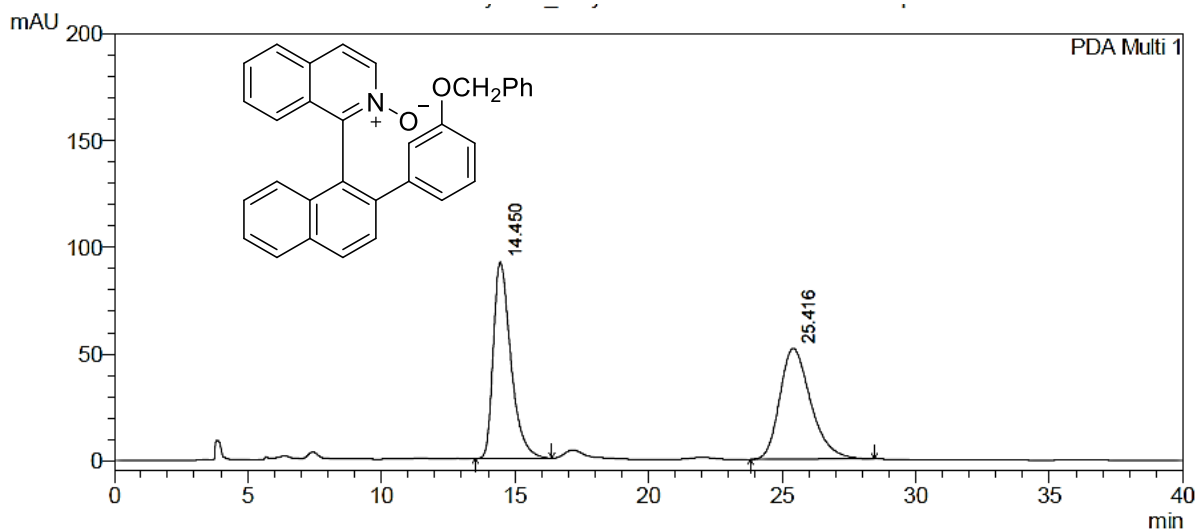

PDA Ch1 310nm 4mm

| Peak# | Ret. Time | Area    | Height | Area %  | Height % |
|-------|-----------|---------|--------|---------|----------|
| 1     | 14.450    | 4199431 | 92073  | 50.002  | 63.908   |
| 2     | 25.416    | 4199174 | 51997  | 49.998  | 36.092   |
| Total |           | 8398605 | 144070 | 100.000 | 100.000  |

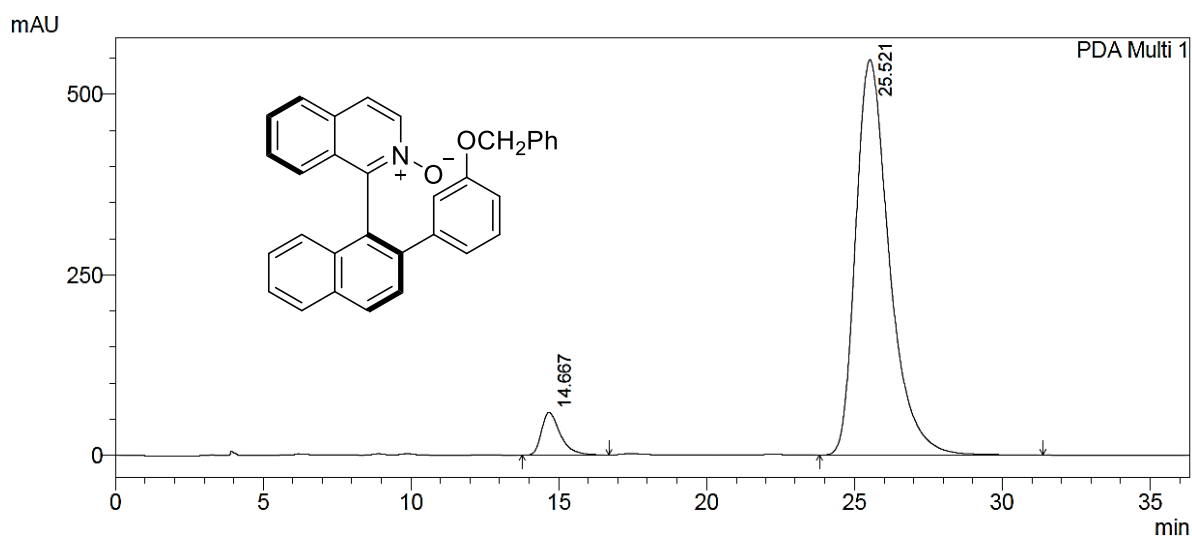

PDA Ch1 310nm 4mm

| Peak# | Ret. Time | Area     | Height | Area %  | Height % |
|-------|-----------|----------|--------|---------|----------|
| 1     | 14.667    | 2607756  | 58994  | 5.695   | 9.744    |
| 2     | 25.521    | 43185598 | 546420 | 94.305  | 90.256   |
| Total |           | 45793355 | 605414 | 100.000 | 100.000  |

*(R)*-1-(2-(3,5-dimethylphenyl)naphthalen-1-yl)isoquinoline 2-oxide (**3m**)

<sup>1</sup>H NMR (500 MHz)

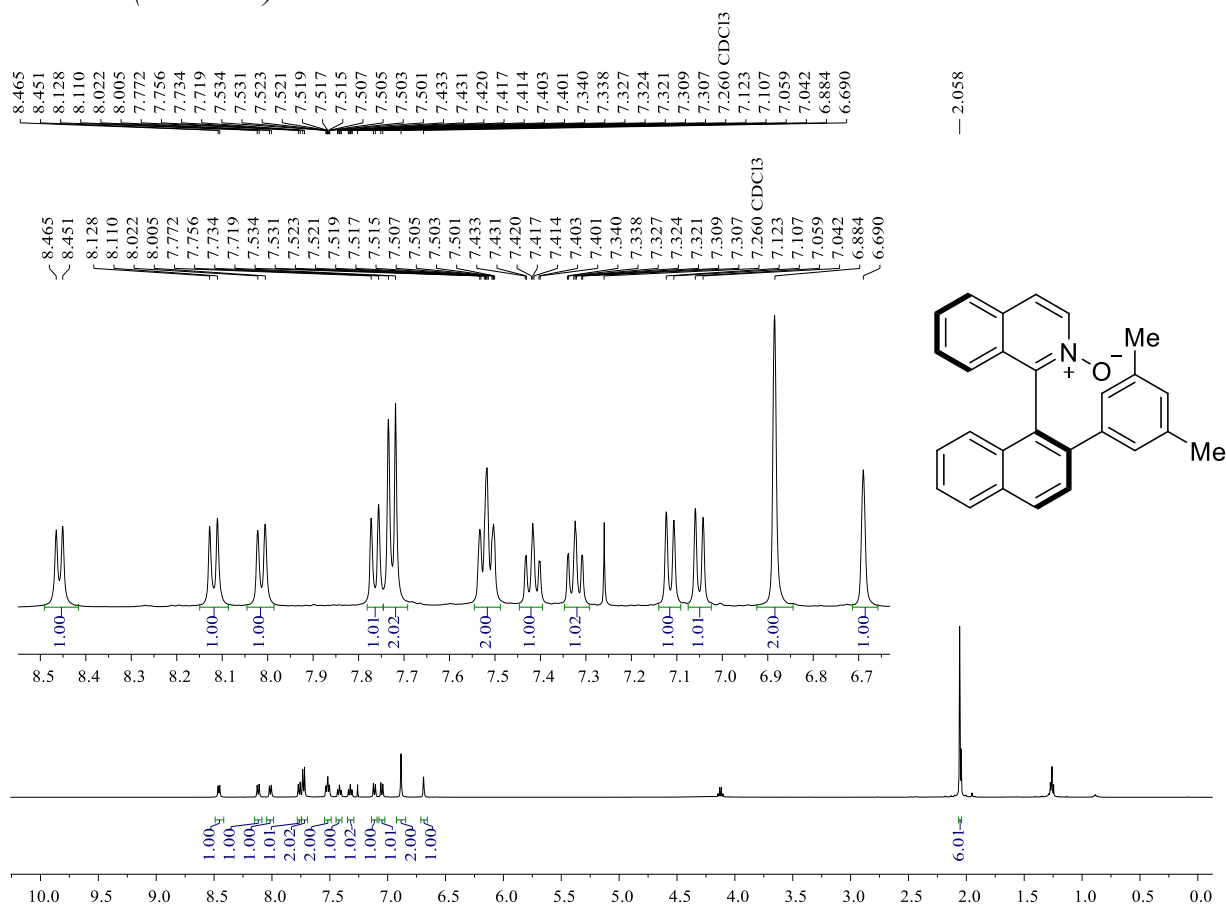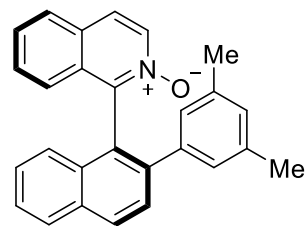

<sup>13</sup>C NMR (125 MHz)

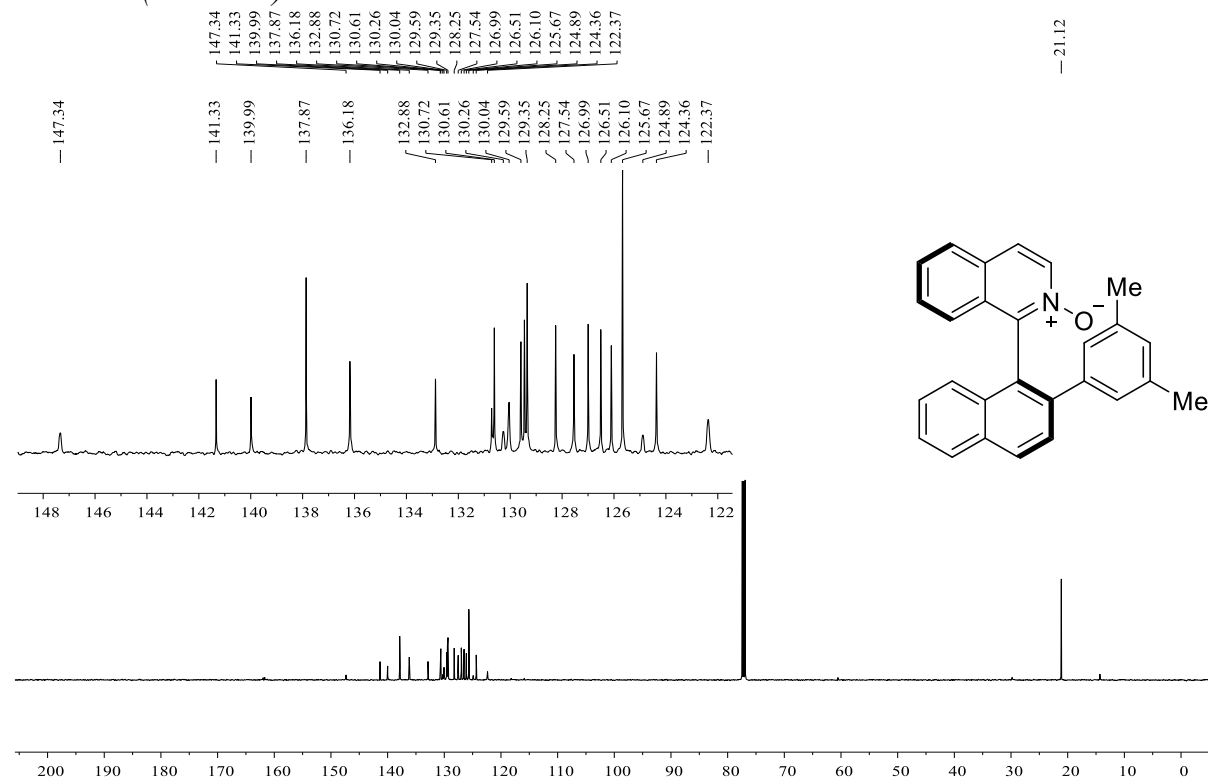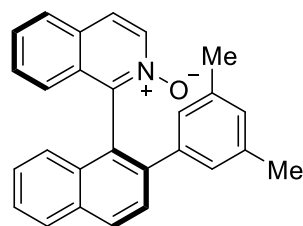

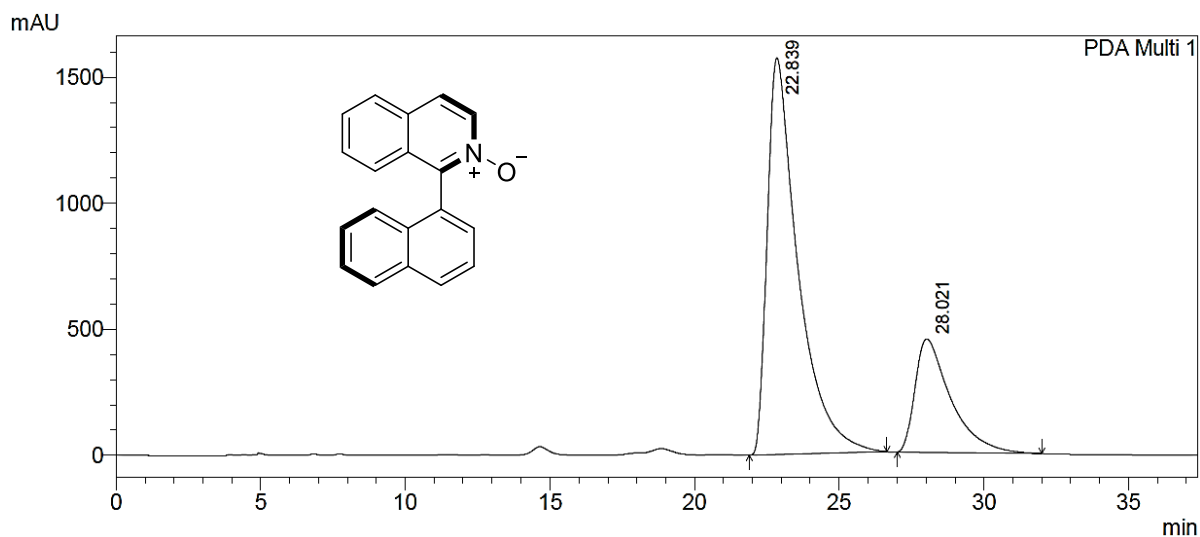

PDA Ch1 254nm 4nm

| Peak# | Ret. Time | Area      | Height  | Area %  | Height % |
|-------|-----------|-----------|---------|---------|----------|
| 1     | 22.839    | 115989649 | 1570923 | 75.027  | 77.753   |
| 2     | 28.021    | 38607738  | 449485  | 24.973  | 22.247   |
| Total |           | 154597388 | 2020407 | 100.000 | 100.000  |

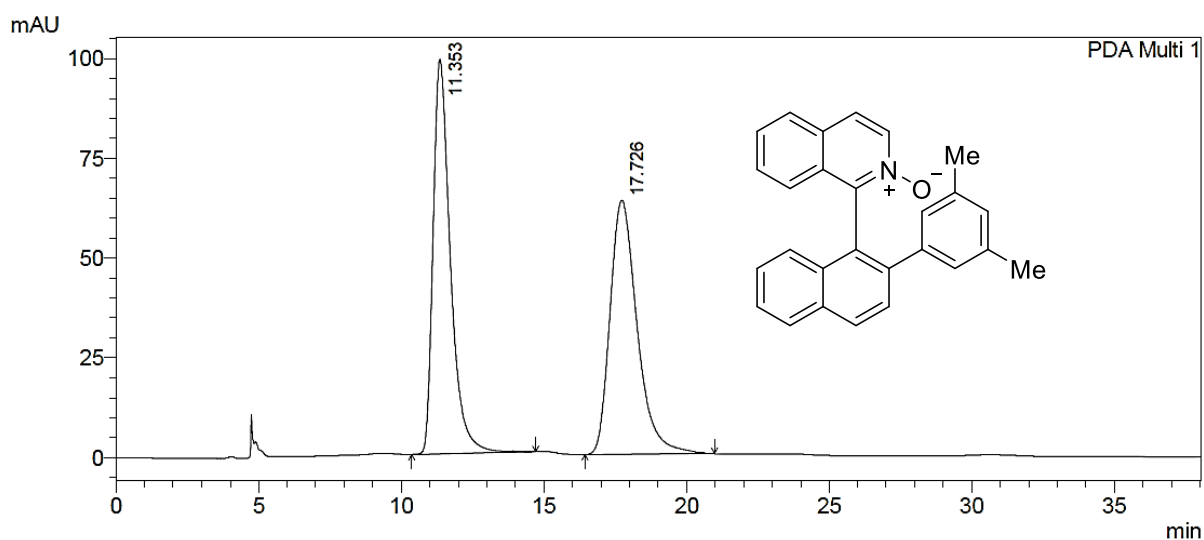

PDA Ch1 310nm 4nm

| Peak# | Ret. Time | Area    | Height | Area %  | Height % |
|-------|-----------|---------|--------|---------|----------|
| 1     | 11.353    | 4167488 | 98848  | 49.721  | 60.808   |
| 2     | 17.726    | 4214241 | 63710  | 50.279  | 39.192   |
| Total |           | 8381729 | 162559 | 100.000 | 100.000  |

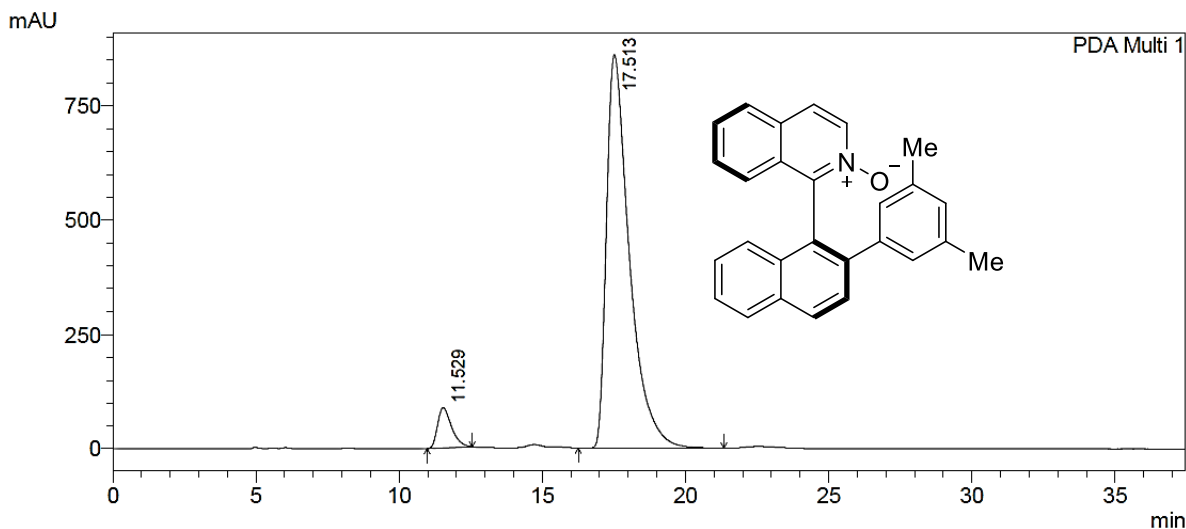

PDA Ch1 310nm 4nm

| Peak# | Ret. Time | Area     | Height | Area %  | Height % |
|-------|-----------|----------|--------|---------|----------|
| 1     | 11.529    | 2997853  | 87989  | 5.869   | 9.283    |
| 2     | 17.513    | 48085241 | 859816 | 94.131  | 90.717   |
| Total |           | 51083094 | 947805 | 100.000 | 100.000  |

*(R)*-1-(2-(3-(trifluoromethyl)phenyl)naphthalen-1-yl)isoquinoline 2-oxide (**3n**)

<sup>1</sup>H NMR (500 MHz)

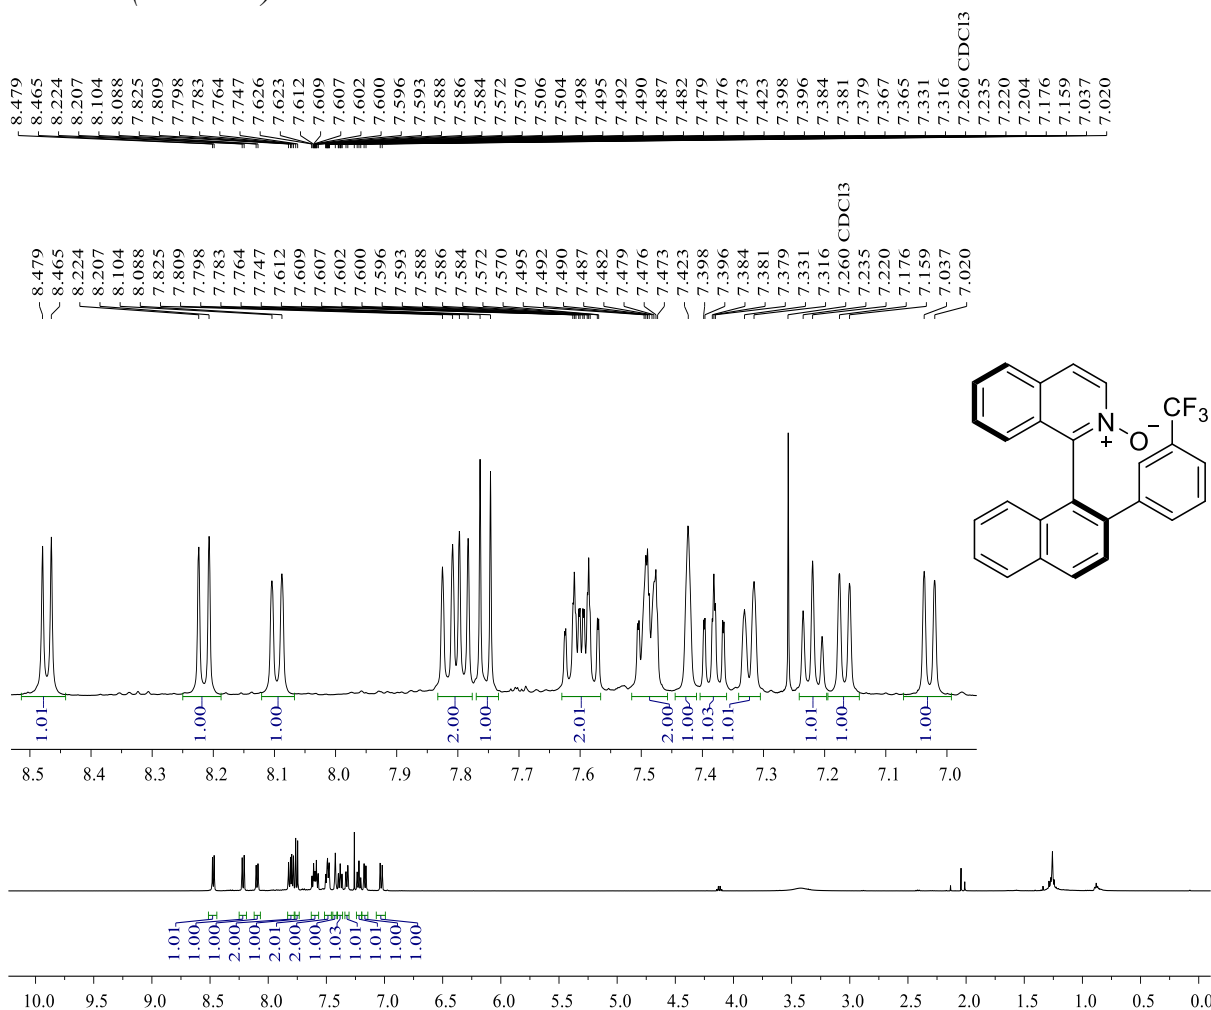

<sup>13</sup>C NMR (125 MHz)

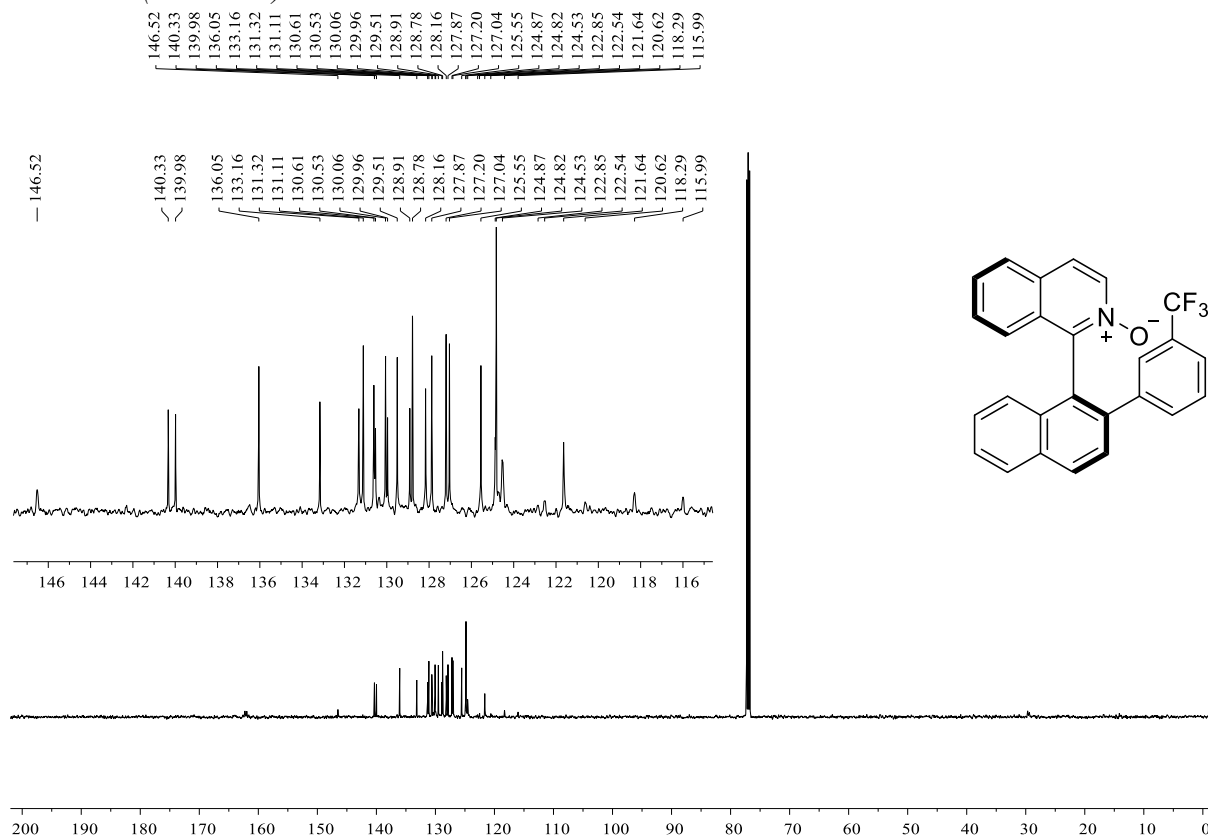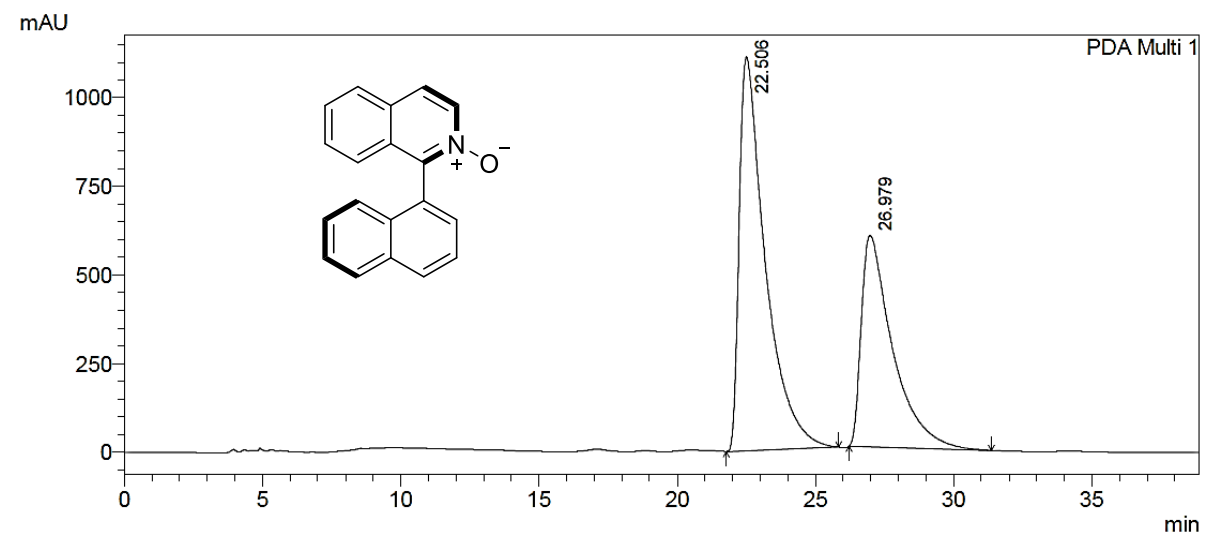

PDA Ch1 254nm 4mm

| Peak# | Ret. Time | Area      | Height  | Area %  | Height % |
|-------|-----------|-----------|---------|---------|----------|
| 1     | 22.506    | 72840631  | 1111765 | 60.893  | 65.077   |
| 2     | 26.979    | 46779754  | 596626  | 39.107  | 34.923   |
| Total |           | 119620385 | 1708391 | 100.000 | 100.000  |

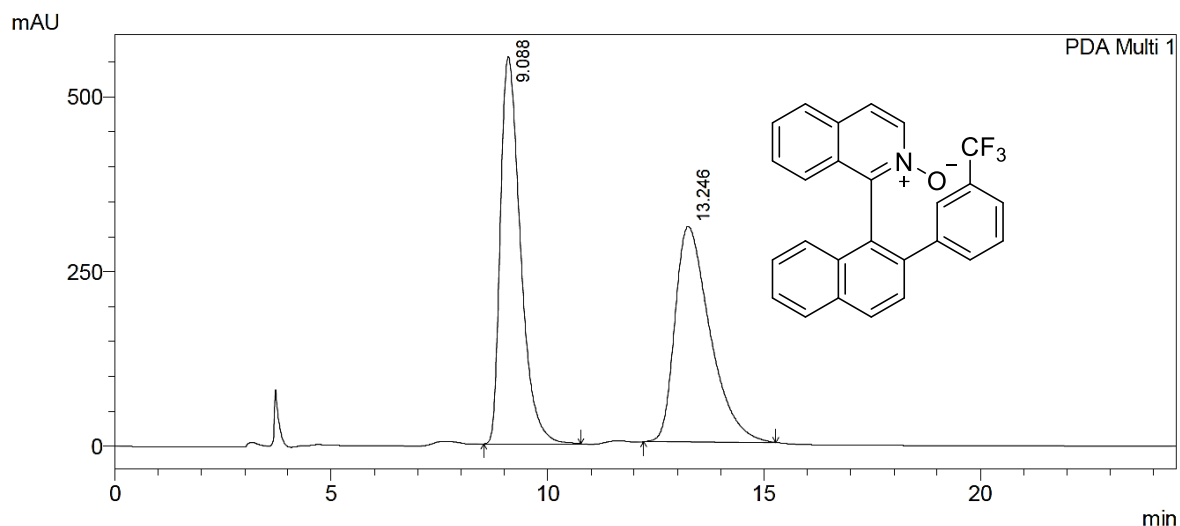

PDA Ch1 254nm 4mm

| Peak# | Ret. Time | Area     | Height | Area %  | Height % |
|-------|-----------|----------|--------|---------|----------|
| 1     | 9.088     | 17791445 | 553438 | 50.589  | 64.224   |
| 2     | 13.246    | 17377092 | 308297 | 49.411  | 35.776   |
| Total |           | 35168537 | 861736 | 100.000 | 100.000  |

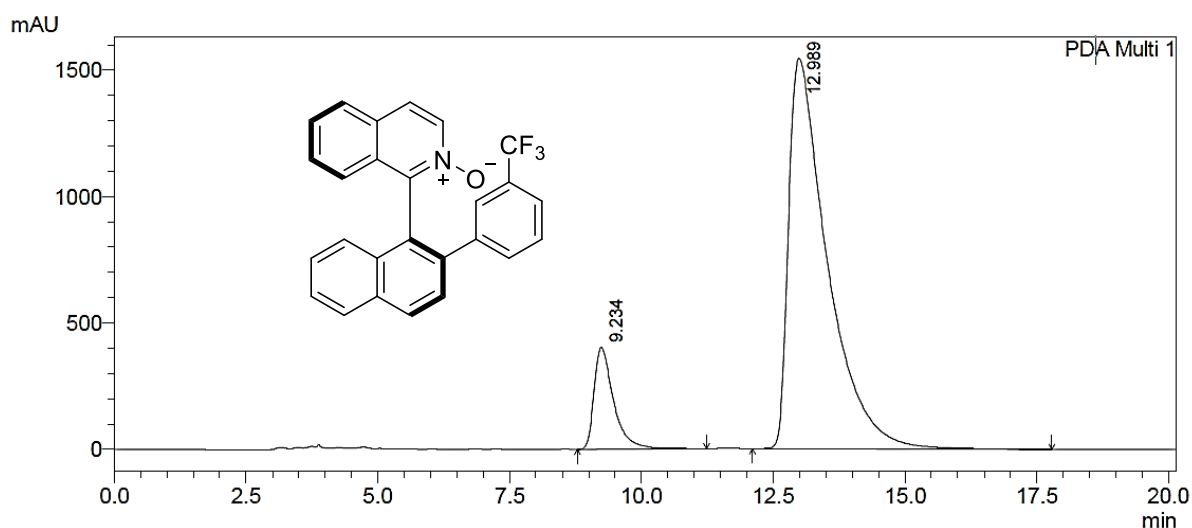

PDA Ch1 254nm 4mm

| Peak# | Ret. Time | Area     | Height  | Area %  | Height % |
|-------|-----------|----------|---------|---------|----------|
| 1     | 9.234     | 10423620 | 402464  | 11.679  | 20.694   |
| 2     | 12.989    | 78826895 | 1542394 | 88.321  | 79.306   |
| Total |           | 89250515 | 1944858 | 100.000 | 100.000  |



*(R)*-1-(2-(3,5-bis(trifluoromethyl)phenyl)naphthalen-1-yl)isoquinoline 2-oxide (**30**)

<sup>1</sup>H NMR (500 MHz)

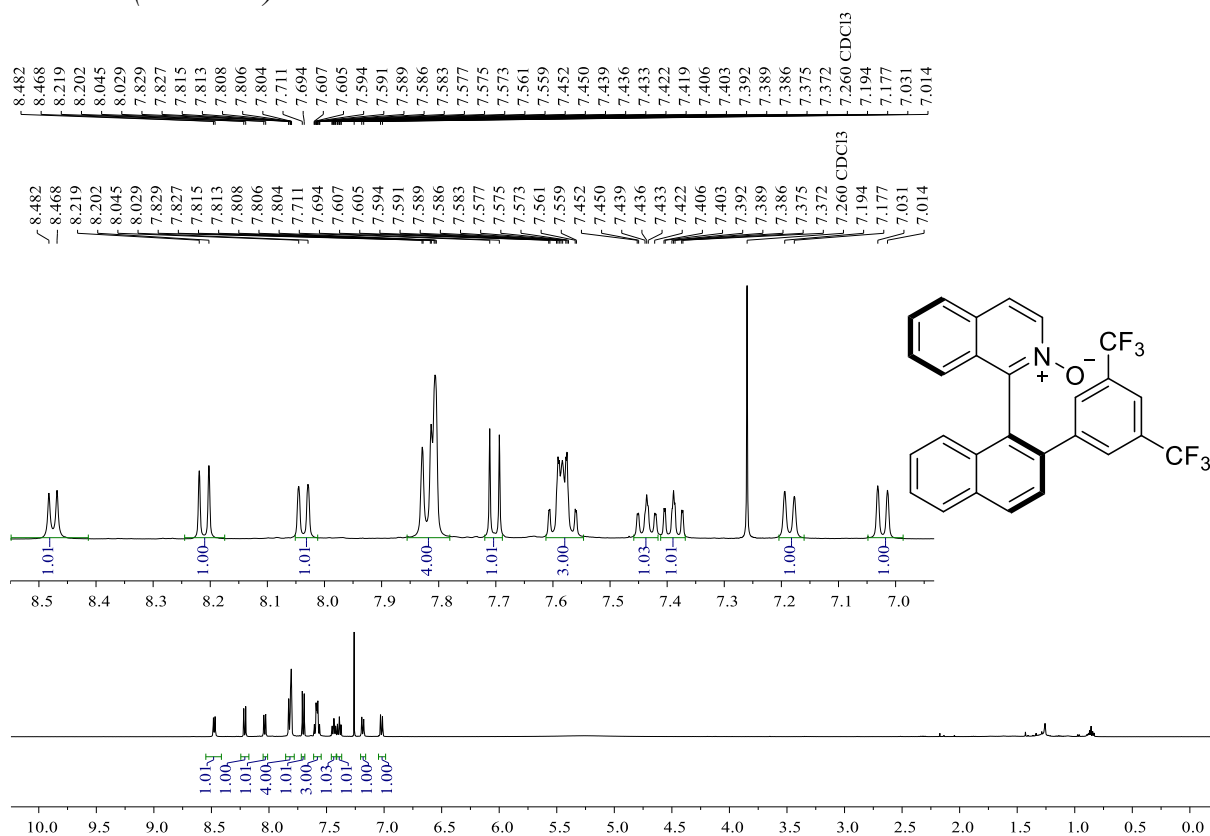

<sup>13</sup>C NMR (125 MHz)

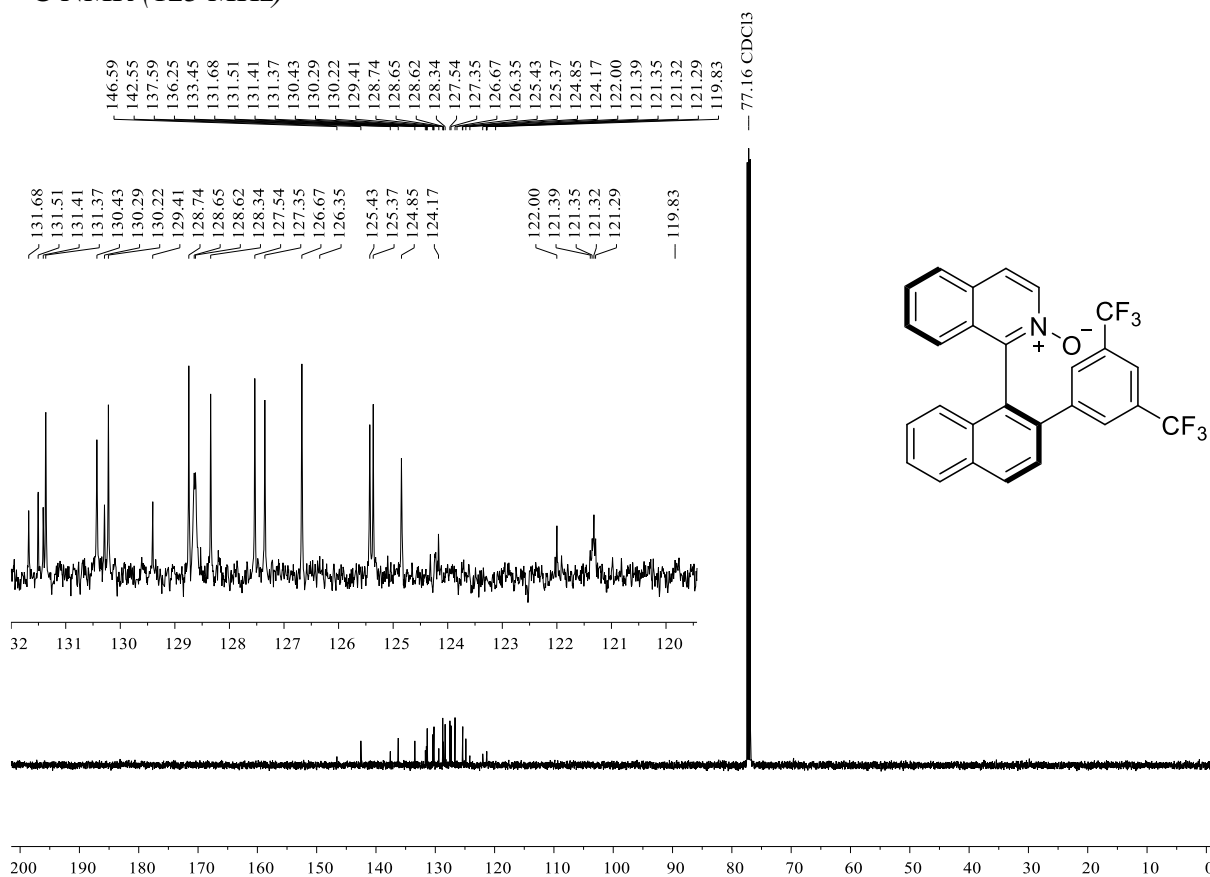

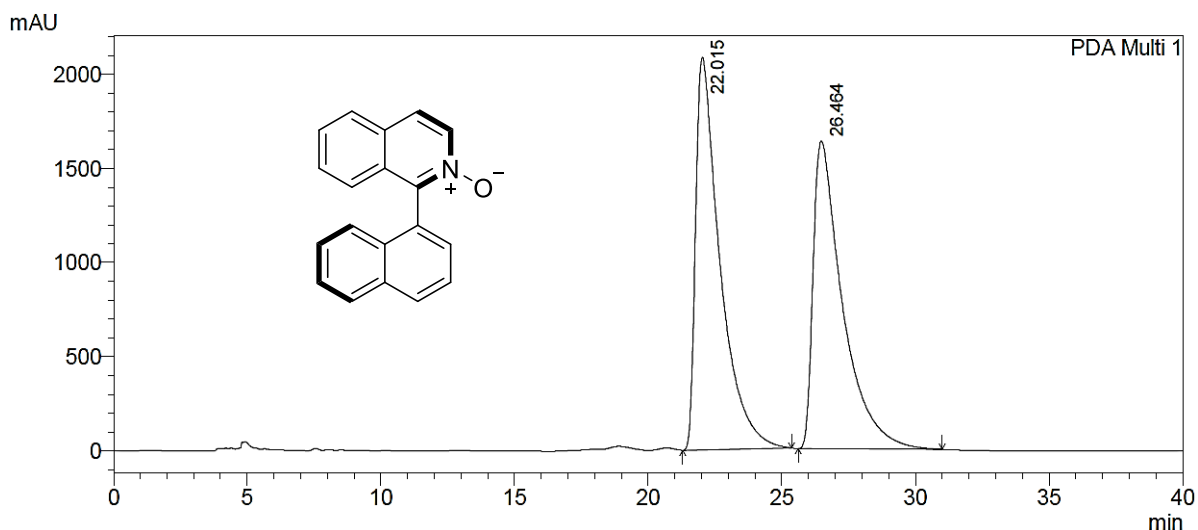

PDA Ch1 254nm 4mm

| Peak# | Ret. Time | Area      | Height  | Area %  | Height % |
|-------|-----------|-----------|---------|---------|----------|
| 1     | 22.015    | 131965834 | 2084569 | 51.366  | 56.038   |
| 2     | 26.464    | 124947604 | 1635338 | 48.634  | 43.962   |
| Total |           | 256913438 | 3719907 | 100.000 | 100.000  |

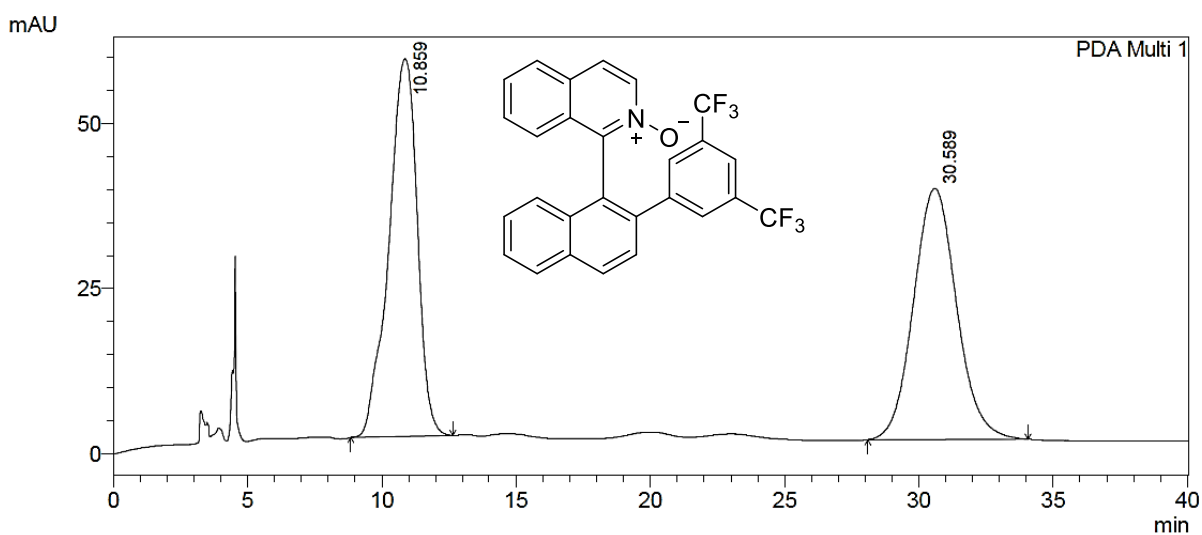

PDA Ch1 274nm 4mm

| Peak# | Ret. Time | Area    | Height | Area %  | Height % |
|-------|-----------|---------|--------|---------|----------|
| 1     | 10.859    | 4234787 | 57225  | 49.931  | 60.070   |
| 2     | 30.589    | 4246500 | 38039  | 50.069  | 39.930   |
| Total |           | 8481287 | 95264  | 100.000 | 100.000  |

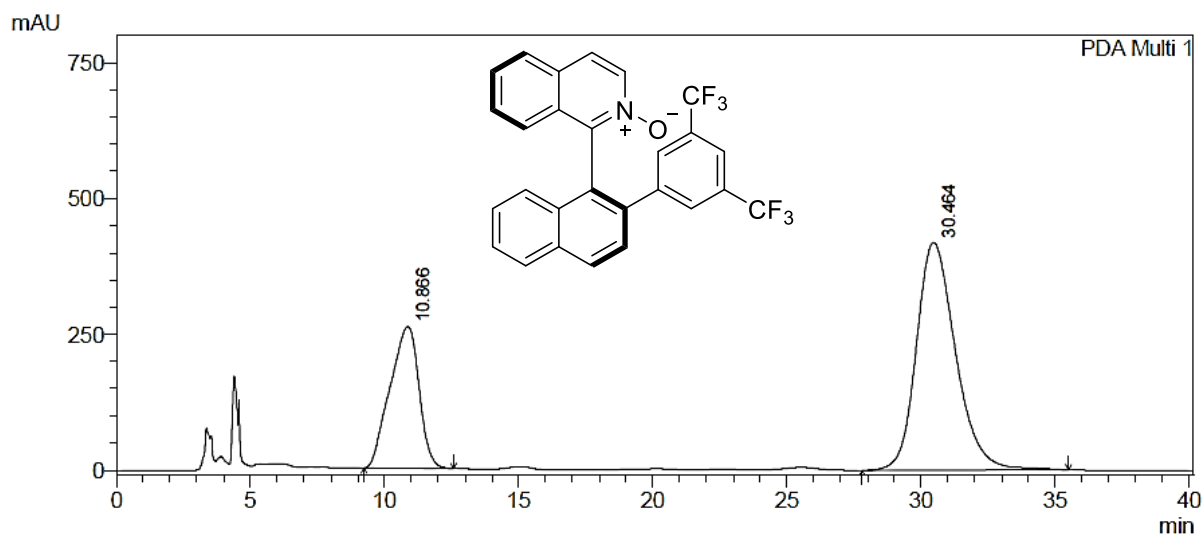

PDA Ch1 254nm 4nm

| Peak# | Ret. Time | Area     | Height | Area %  | Height % |
|-------|-----------|----------|--------|---------|----------|
| 1     | 10.866    | 19681323 | 260627 | 31.615  | 38.350   |
| 2     | 30.464    | 42571703 | 418967 | 68.385  | 61.650   |
| Total |           | 62253026 | 679594 | 100.000 | 100.000  |

*(R)-1-(2-(9H-fluoren-3-yl)naphthalen-1-yl)isoquinoline 2-oxide (3p)*

<sup>1</sup>H NMR (600 MHz)

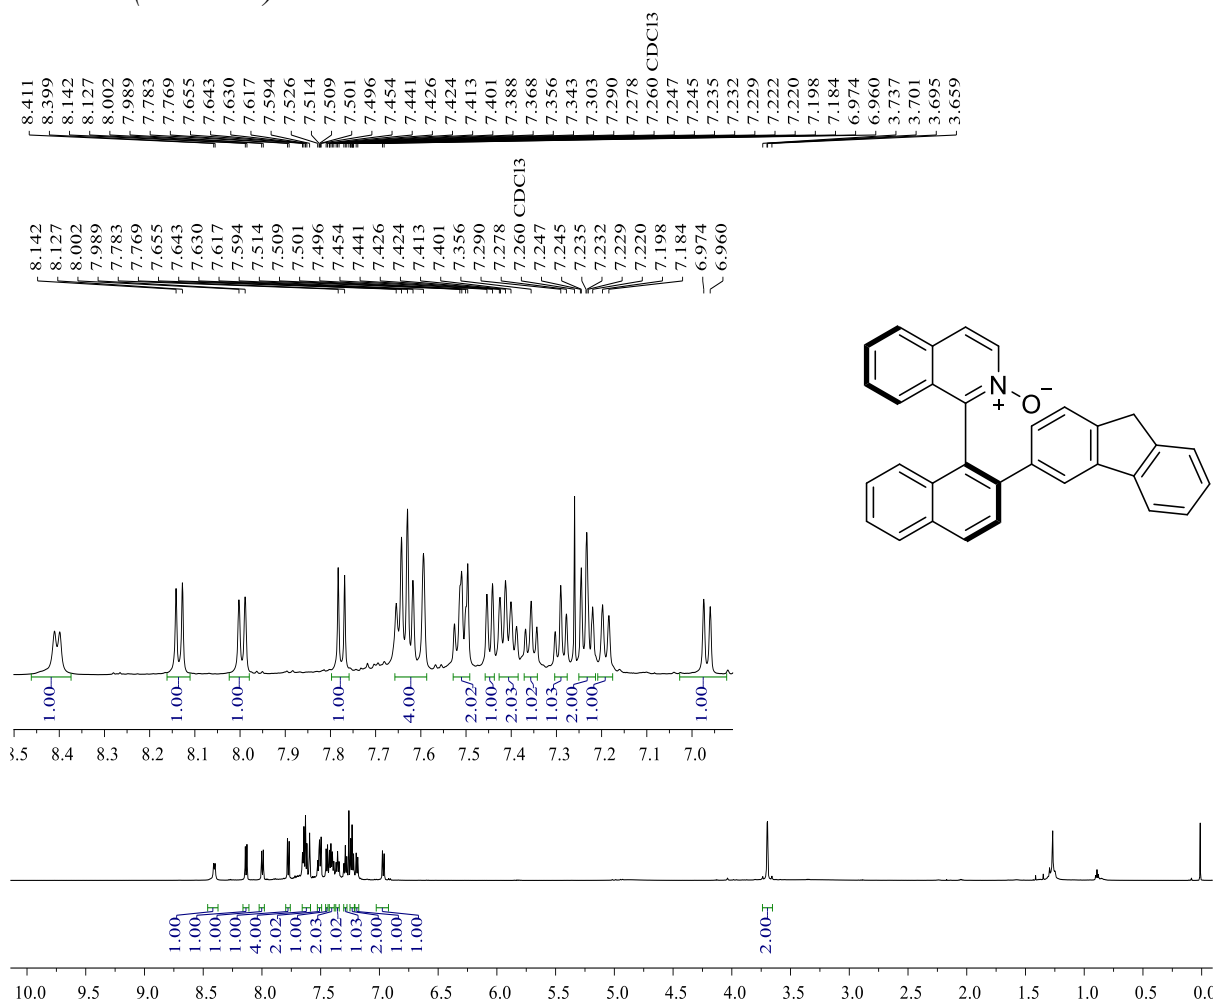

$^{13}\text{C}\{^1\text{H}\}$  NMR (150 MHz)

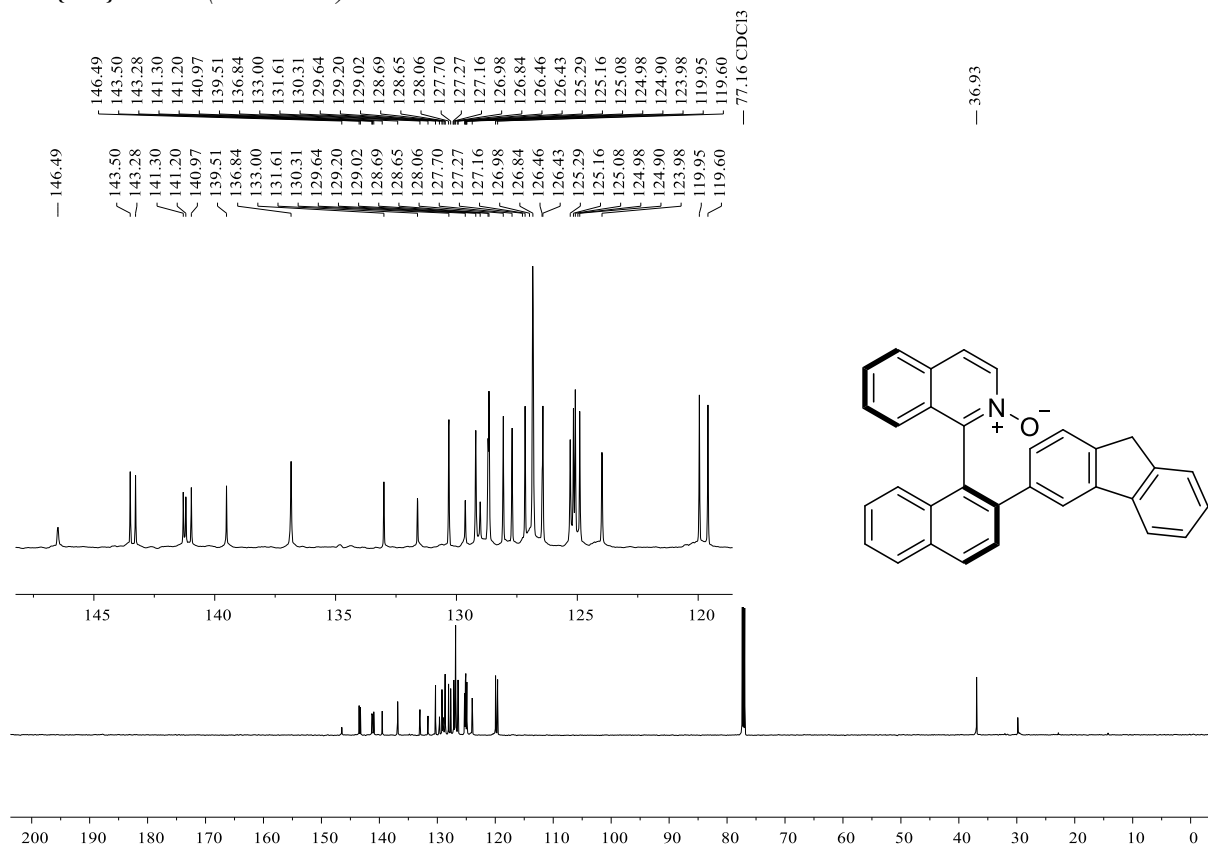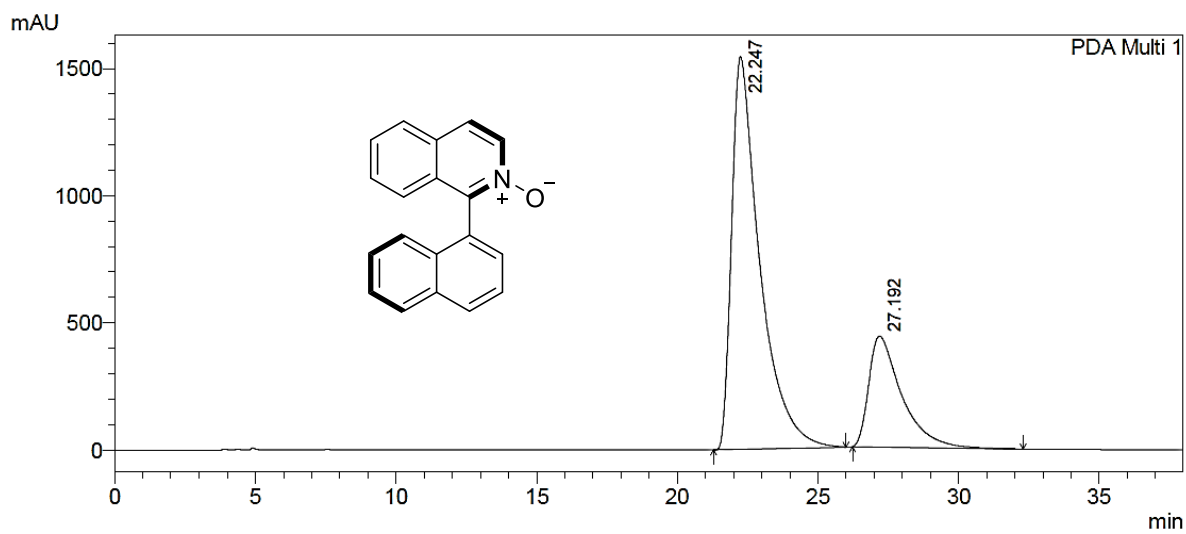

PDA Ch1 254nm 4mm

| Peak# | Ret. Time | Area      | Height  | Area %  | Height % |
|-------|-----------|-----------|---------|---------|----------|
| 1     | 22.247    | 107291982 | 1542622 | 75.125  | 77.942   |
| 2     | 27.192    | 35525046  | 436566  | 24.875  | 22.058   |
| Total |           | 142817028 | 1979188 | 100.000 | 100.000  |

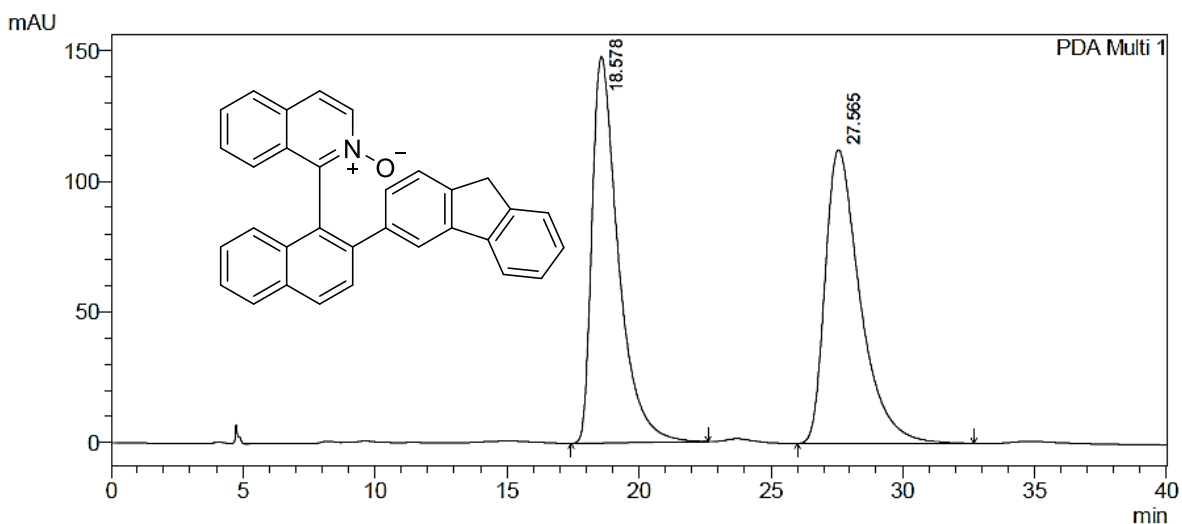

PDA Ch1 310mm 4mm

| Peak# | Ret. Time | Area     | Height | Area %  | Height % |
|-------|-----------|----------|--------|---------|----------|
| 1     | 18.578    | 10239536 | 147927 | 49.700  | 56.828   |
| 2     | 27.565    | 10363240 | 112382 | 50.300  | 43.172   |
| Total |           | 20602776 | 260309 | 100.000 | 100.000  |

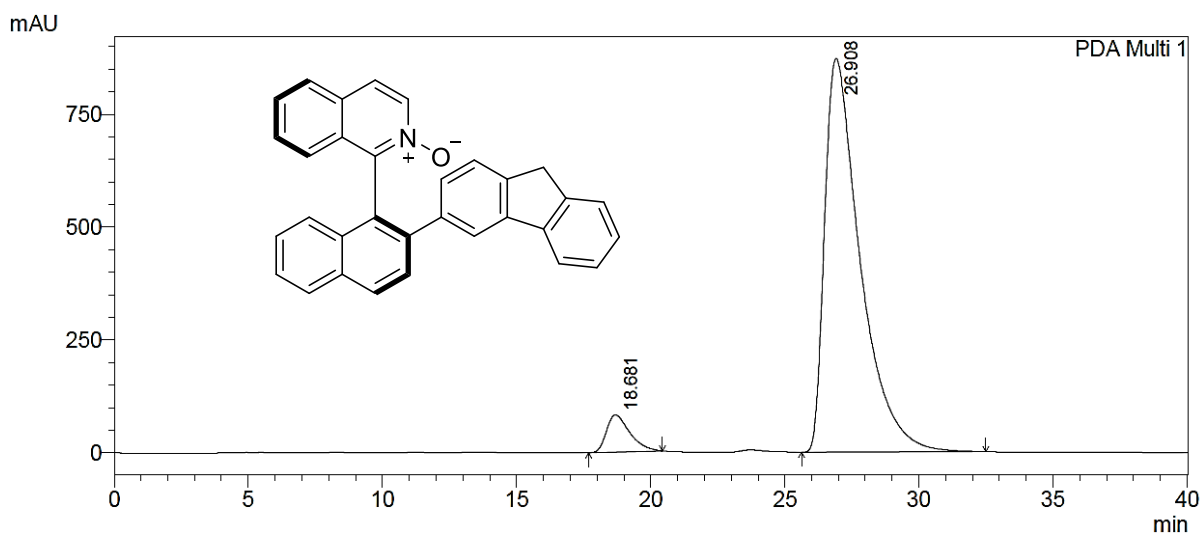

PDA Ch1 310mm 4mm

| Peak# | Ret. Time | Area     | Height | Area %  | Height % |
|-------|-----------|----------|--------|---------|----------|
| 1     | 18.681    | 4945406  | 82144  | 5.809   | 8.611    |
| 2     | 26.908    | 80187395 | 871750 | 94.191  | 91.389   |
| Total |           | 85132802 | 953894 | 100.000 | 100.000  |

*(R)*-1-(4'-methoxy-3-methyl-[1,1'-biphenyl]-2-yl)isoquinoline 2-oxide (**3q**)

<sup>1</sup>H NMR (500 MHz)

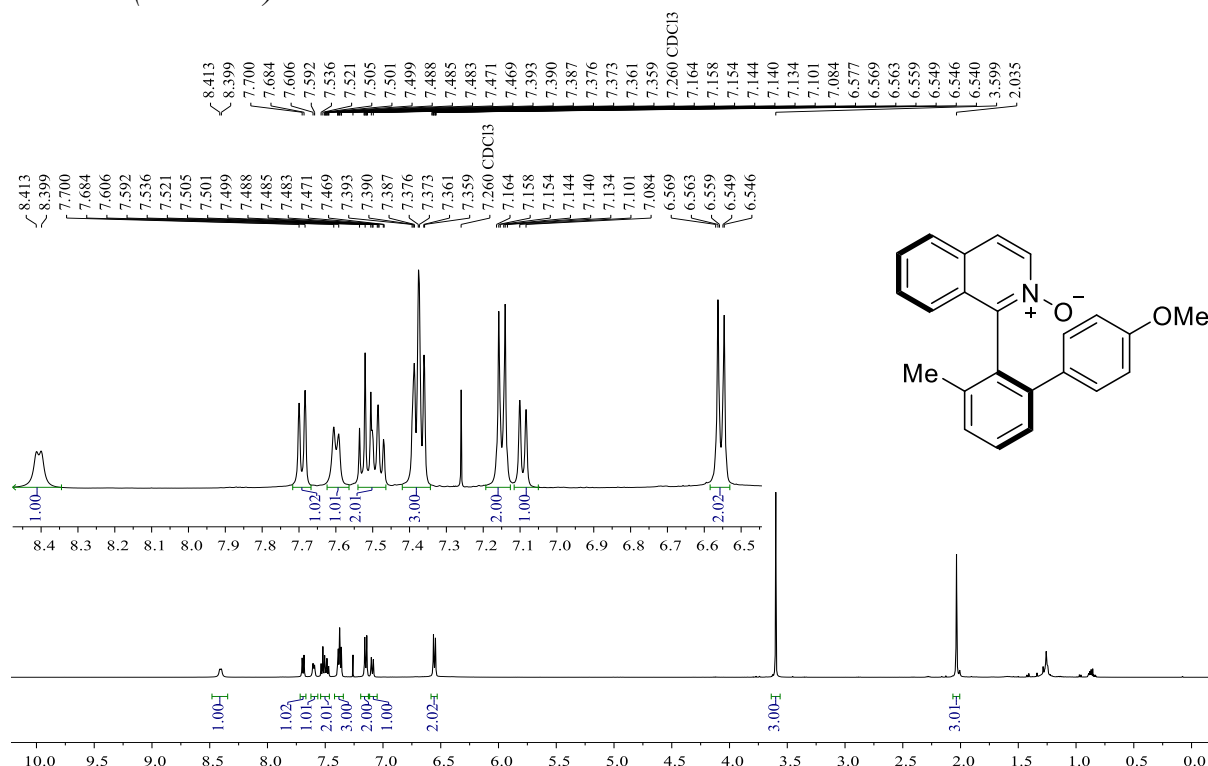

<sup>13</sup>C{<sup>1</sup>H} NMR (125 MHz)

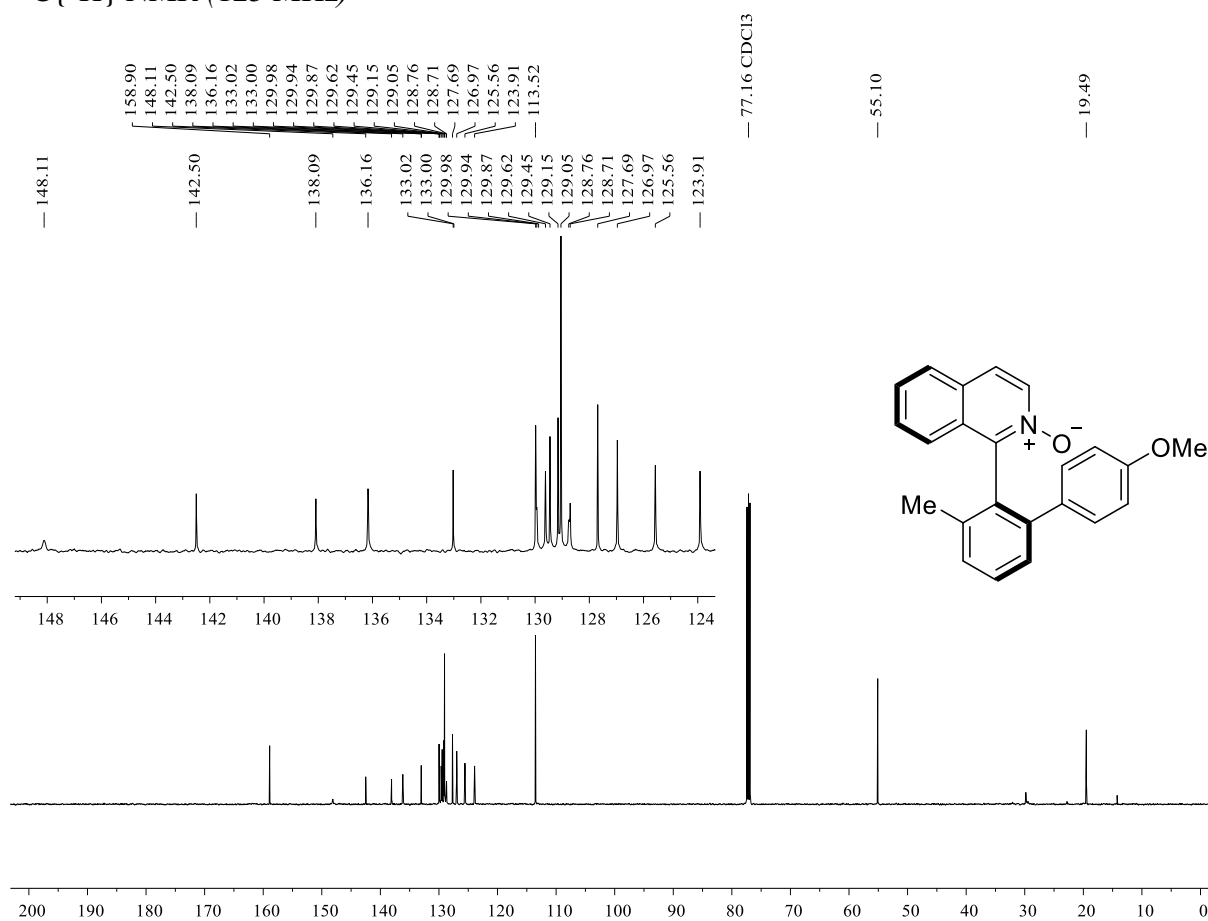

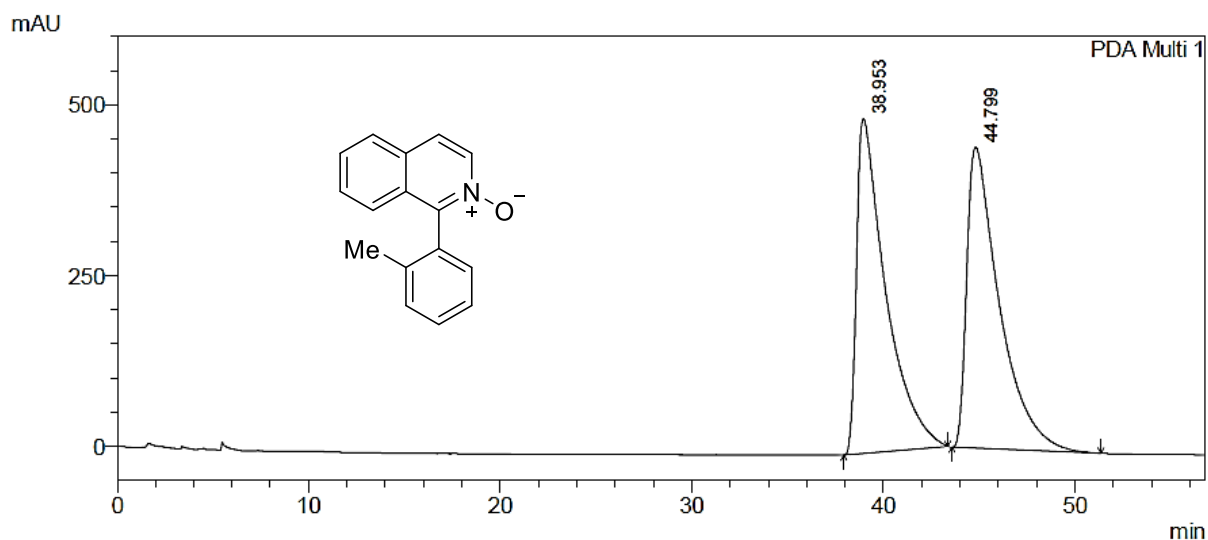

PDA Ch1 254nm 4nm

| Peak# | Ret. Time | Area      | Height | Area %  | Height % |
|-------|-----------|-----------|--------|---------|----------|
| 1     | 38.953    | 51618883  | 489456 | 49.792  | 52.650   |
| 2     | 44.799    | 52050682  | 440193 | 50.208  | 47.350   |
| Total |           | 103669565 | 929649 | 100.000 | 100.000  |

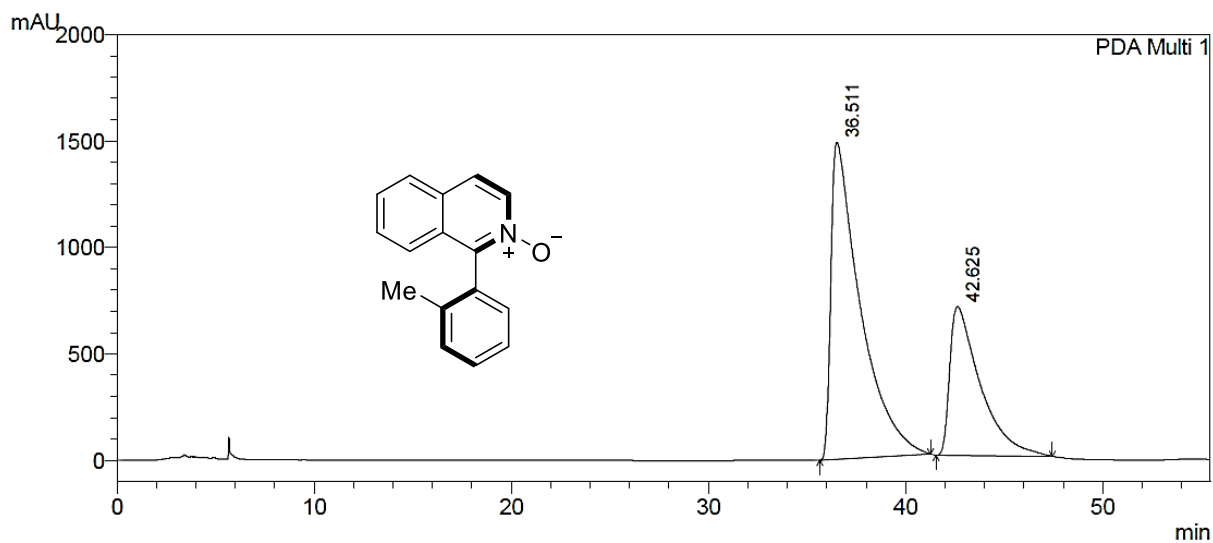

PDA Ch1 254nm 4nm

| Peak# | Ret. Time | Area      | Height  | Area %  | Height % |
|-------|-----------|-----------|---------|---------|----------|
| 1     | 36.511    | 154336306 | 1489843 | 67.281  | 68.075   |
| 2     | 42.625    | 75055742  | 698677  | 32.719  | 31.925   |
| Total |           | 229392048 | 2188520 | 100.000 | 100.000  |

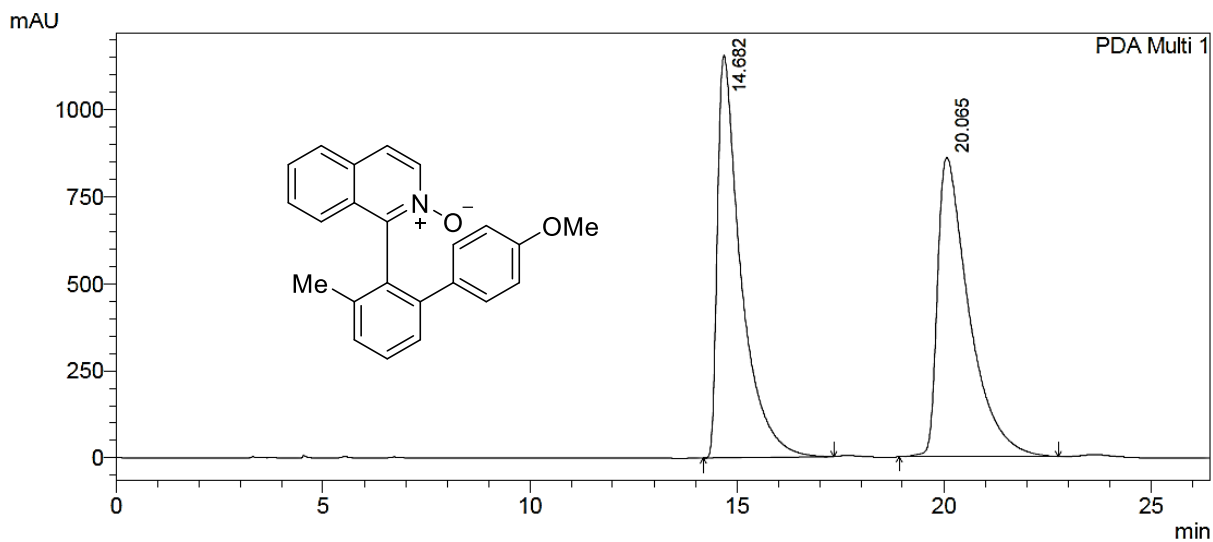

PDA Ch1 254nm 4nm

| Peak# | Ret. Time | Area     | Height  | Area %  | Height % |
|-------|-----------|----------|---------|---------|----------|
| 1     | 14.682    | 45501721 | 1155612 | 49.952  | 57.349   |
| 2     | 20.065    | 45589997 | 859427  | 50.048  | 42.651   |
| Total |           | 91091718 | 2015039 | 100.000 | 100.000  |

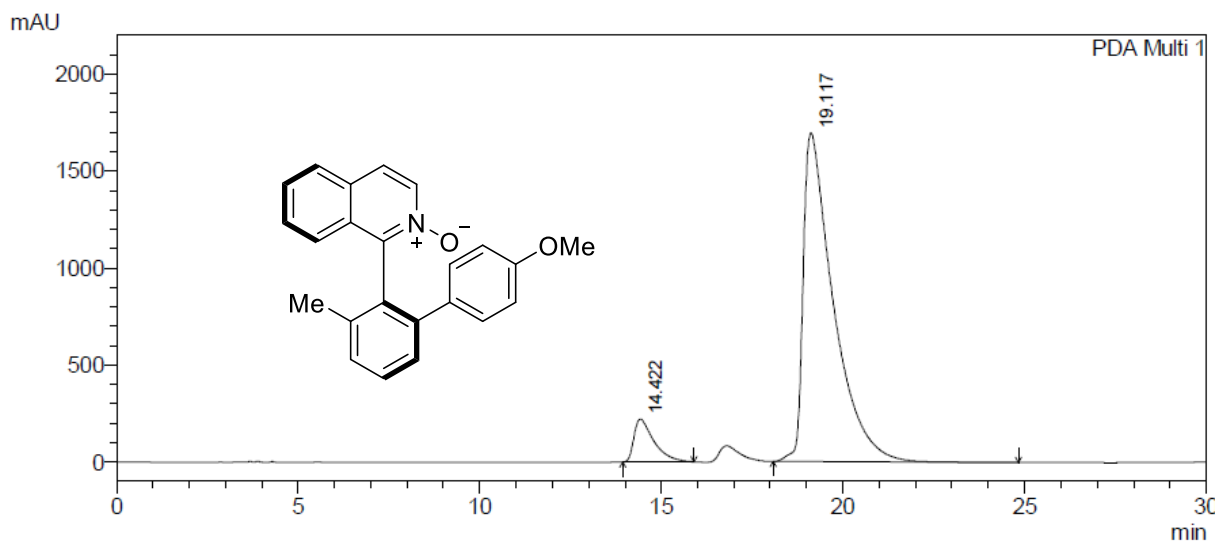

PDA Ch1 254nm 4nm

| Peak# | Ret. Time | Area      | Height  | Area %  | Height % |
|-------|-----------|-----------|---------|---------|----------|
| 1     | 14.422    | 8376386   | 220529  | 7.879   | 11.523   |
| 2     | 19.117    | 97938068  | 1693334 | 92.121  | 88.477   |
| Total |           | 106314453 | 1913863 | 100.000 | 100.000  |



*(R)*-1-(3-ethyl-4'-methoxy-[1,1'-biphenyl]-2-yl)isoquinoline 2-oxide (**3r**)

<sup>1</sup>H NMR (500 MHz)

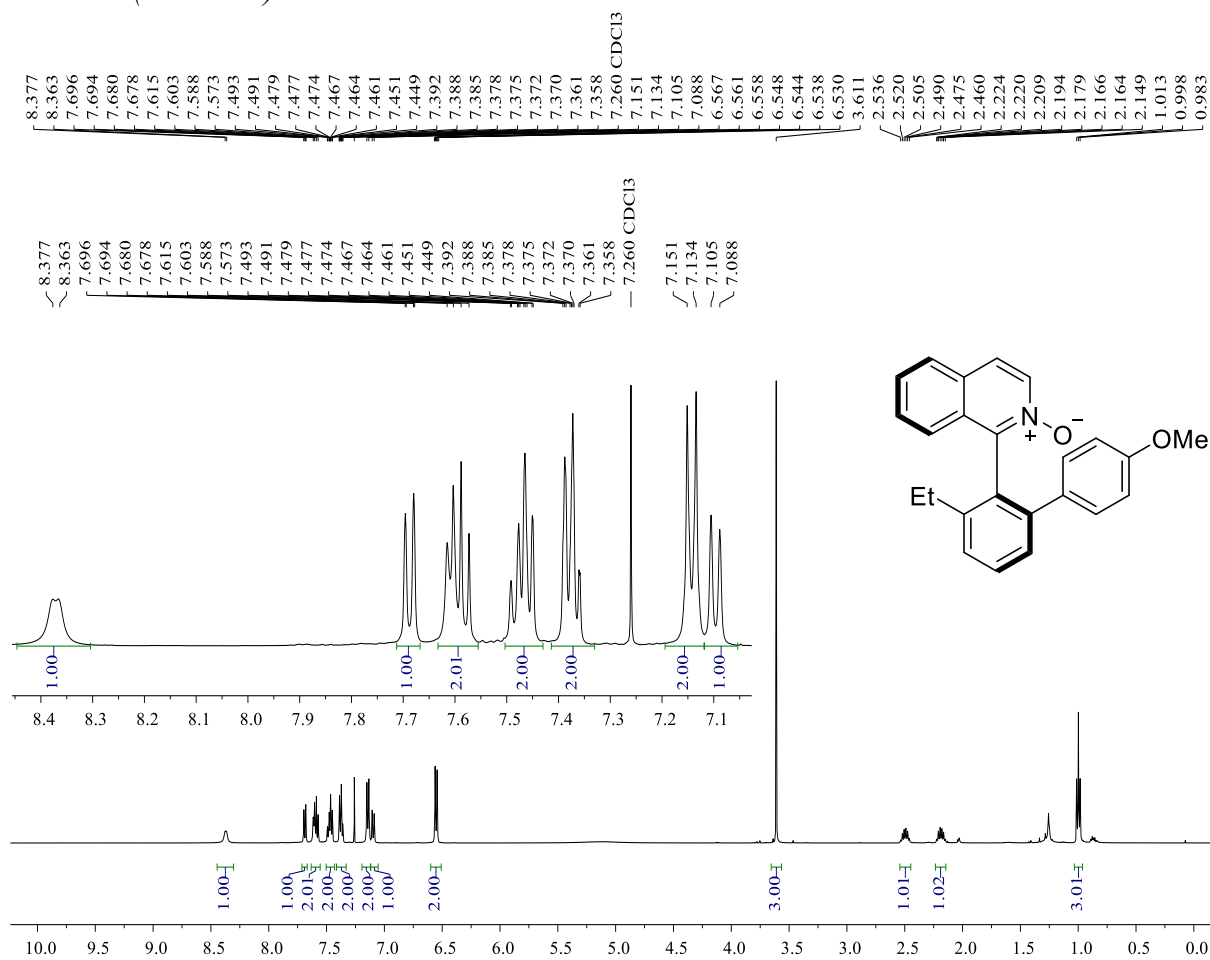

<sup>13</sup>C{<sup>1</sup>H} NMR (125 MHz)

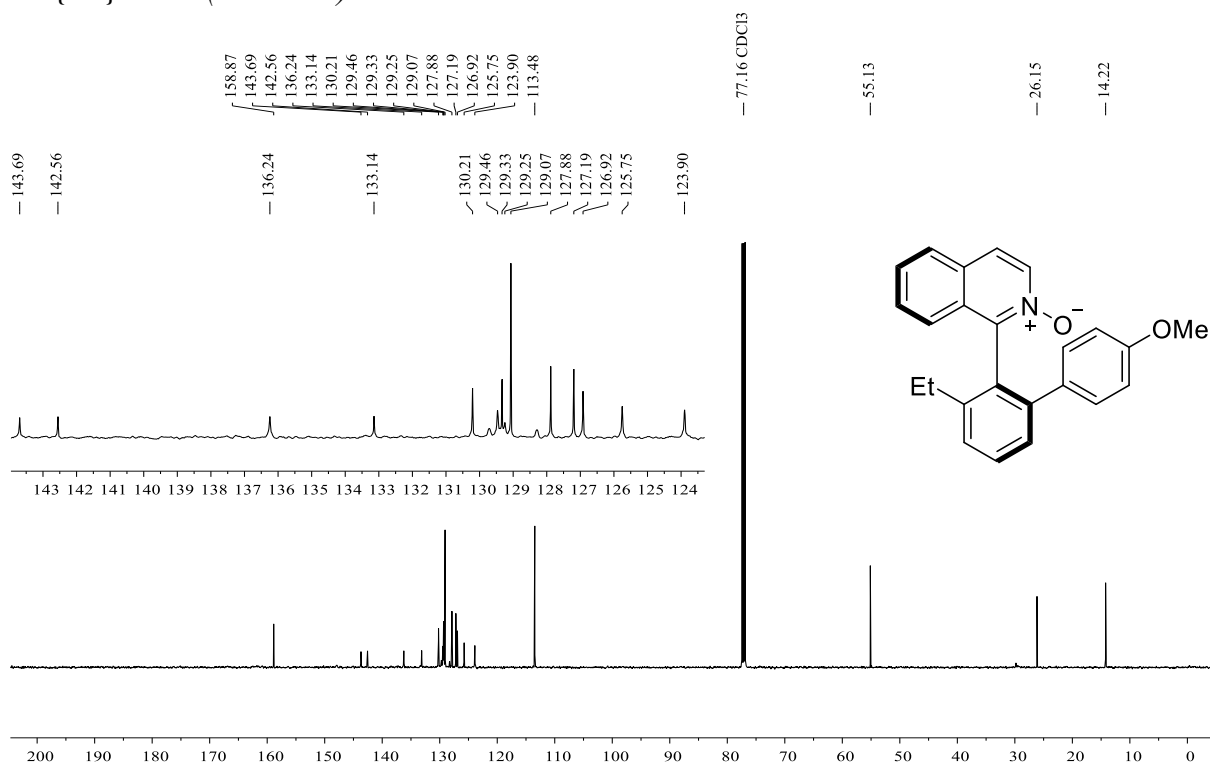

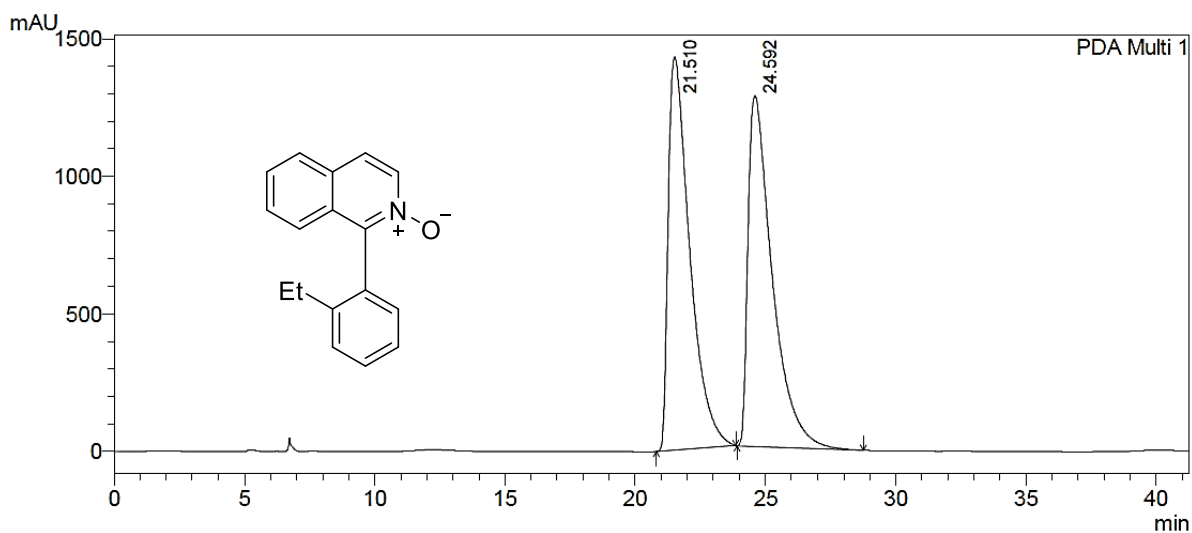

PDA Ch1 254nm 4mm

| Peak# | Ret. Time | Area      | Height  | Area %  | Height % |
|-------|-----------|-----------|---------|---------|----------|
| 1     | 21.510    | 82199190  | 1428822 | 49.966  | 52.862   |
| 2     | 24.592    | 82310606  | 1274092 | 50.034  | 47.138   |
| Total |           | 164509796 | 2702915 | 100.000 | 100.000  |

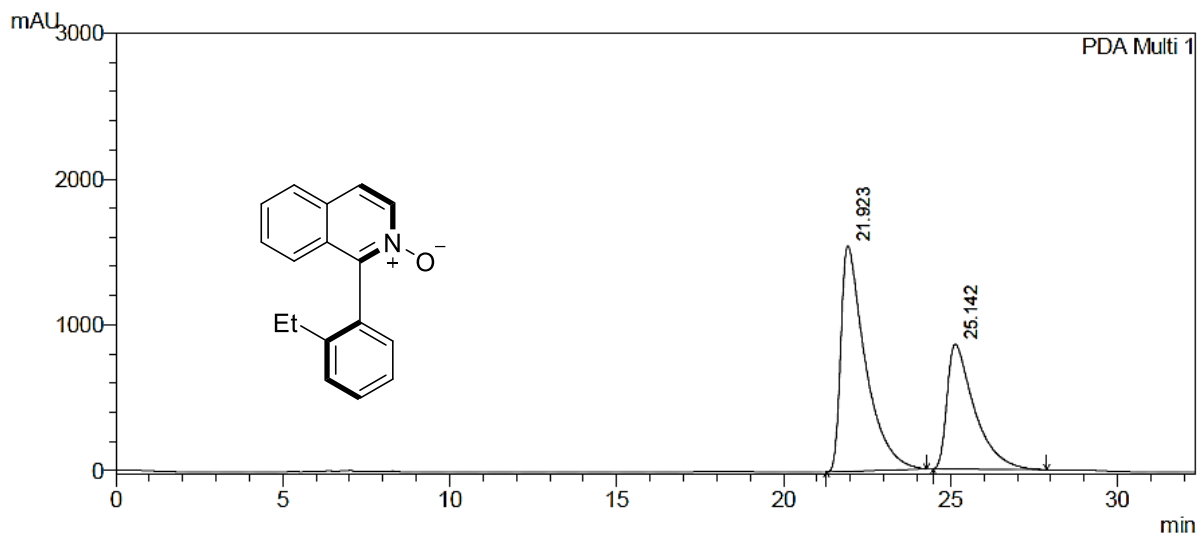

PDA Ch1 254nm 4mm

| Peak# | Ret. Time | Area      | Height  | Area %  | Height % |
|-------|-----------|-----------|---------|---------|----------|
| 1     | 21.923    | 79076722  | 1547559 | 61.764  | 64.351   |
| 2     | 25.142    | 48954499  | 857323  | 38.236  | 35.649   |
| Total |           | 128031221 | 2404882 | 100.000 | 100.000  |

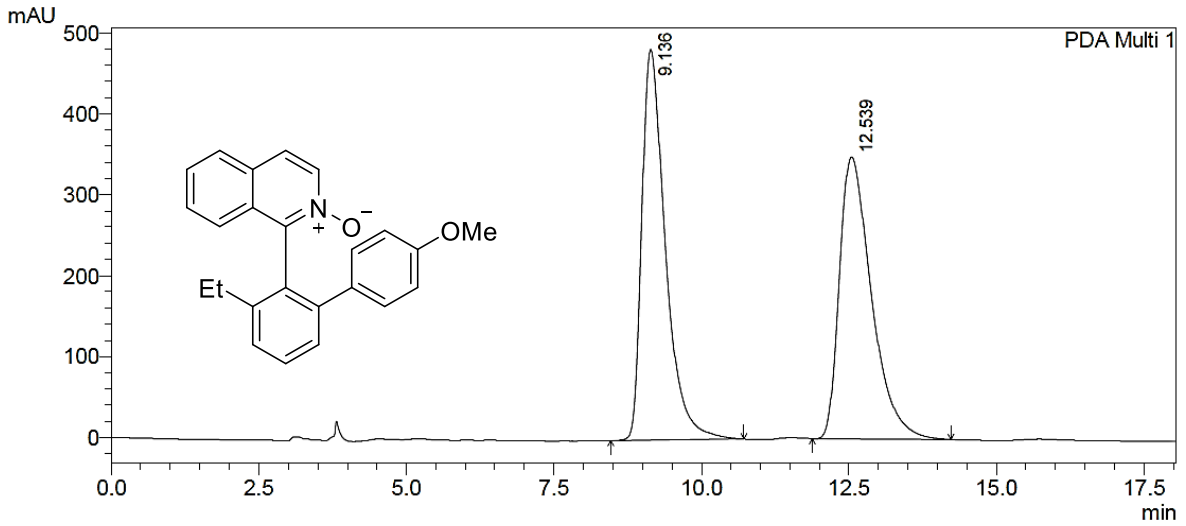

PDA Ch1 254nm 4nm

| Peak# | Ret. Time | Area     | Height | Area %  | Height % |
|-------|-----------|----------|--------|---------|----------|
| 1     | 9.136     | 13420771 | 482639 | 50.478  | 58.083   |
| 2     | 12.539    | 13166460 | 348304 | 49.522  | 41.917   |
| Total |           | 26587231 | 830943 | 100.000 | 100.000  |

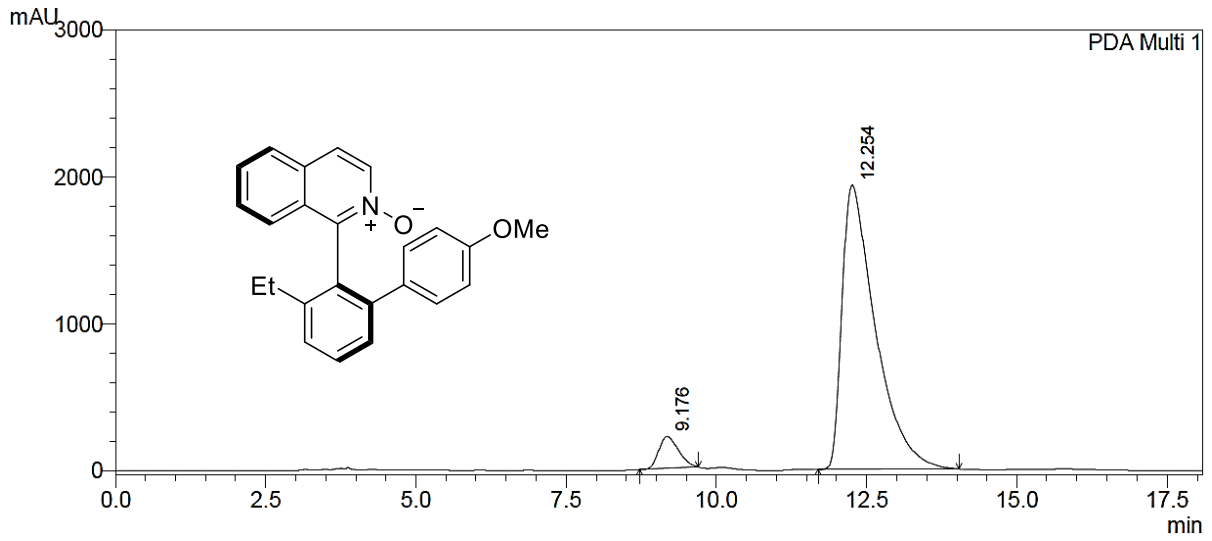

PDA Ch1 254nm 4nm

| Peak# | Ret. Time | Area     | Height  | Area %  | Height % |
|-------|-----------|----------|---------|---------|----------|
| 1     | 9.176     | 4959138  | 217178  | 6.227   | 10.104   |
| 2     | 12.254    | 74676918 | 1932266 | 93.773  | 89.896   |
| Total |           | 79636056 | 2149444 | 100.000 | 100.000  |

*(R)*-1-(3-(benzyloxy)-4'-methoxy-[1,1'-biphenyl]-2-yl)isoquinoline 2-oxide (**3s**)  
<sup>1</sup>H NMR (500 MHz)

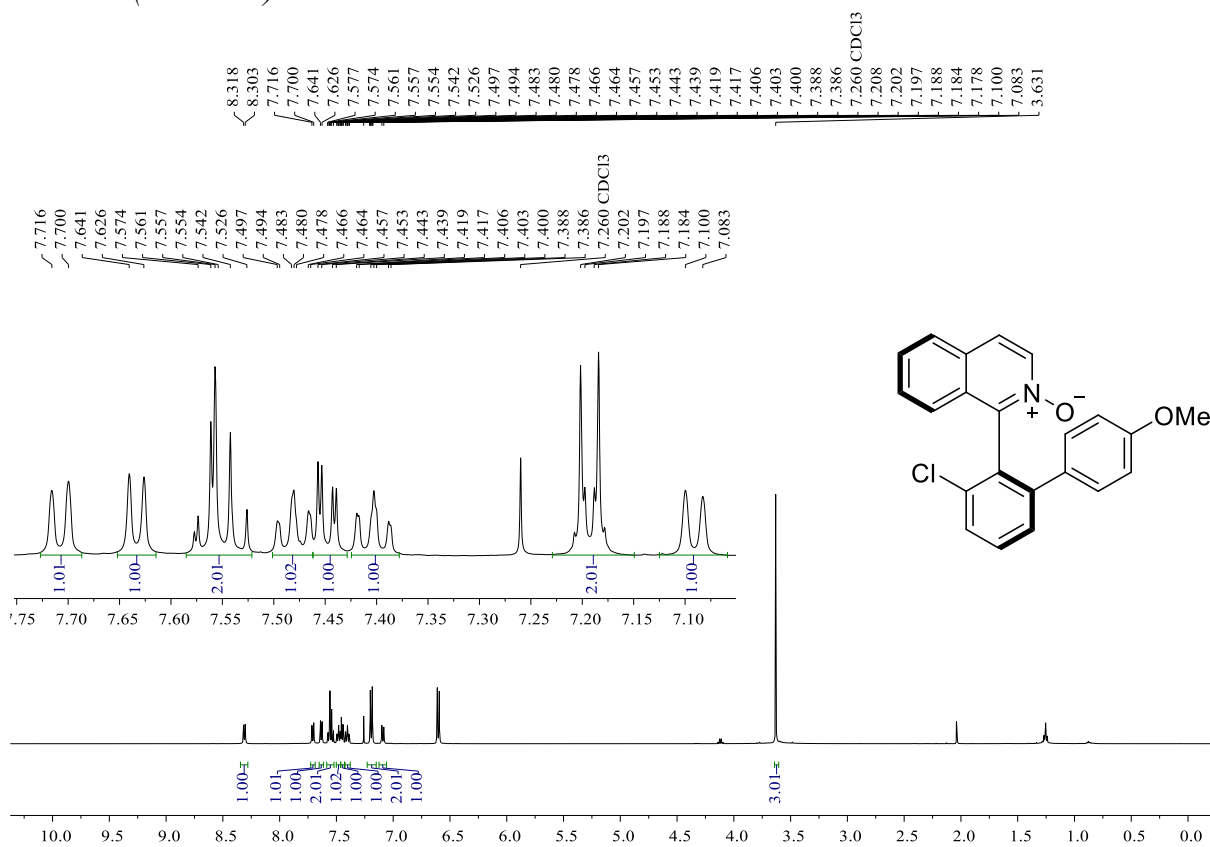

<sup>13</sup>C{<sup>1</sup>H} NMR (125 MHz)

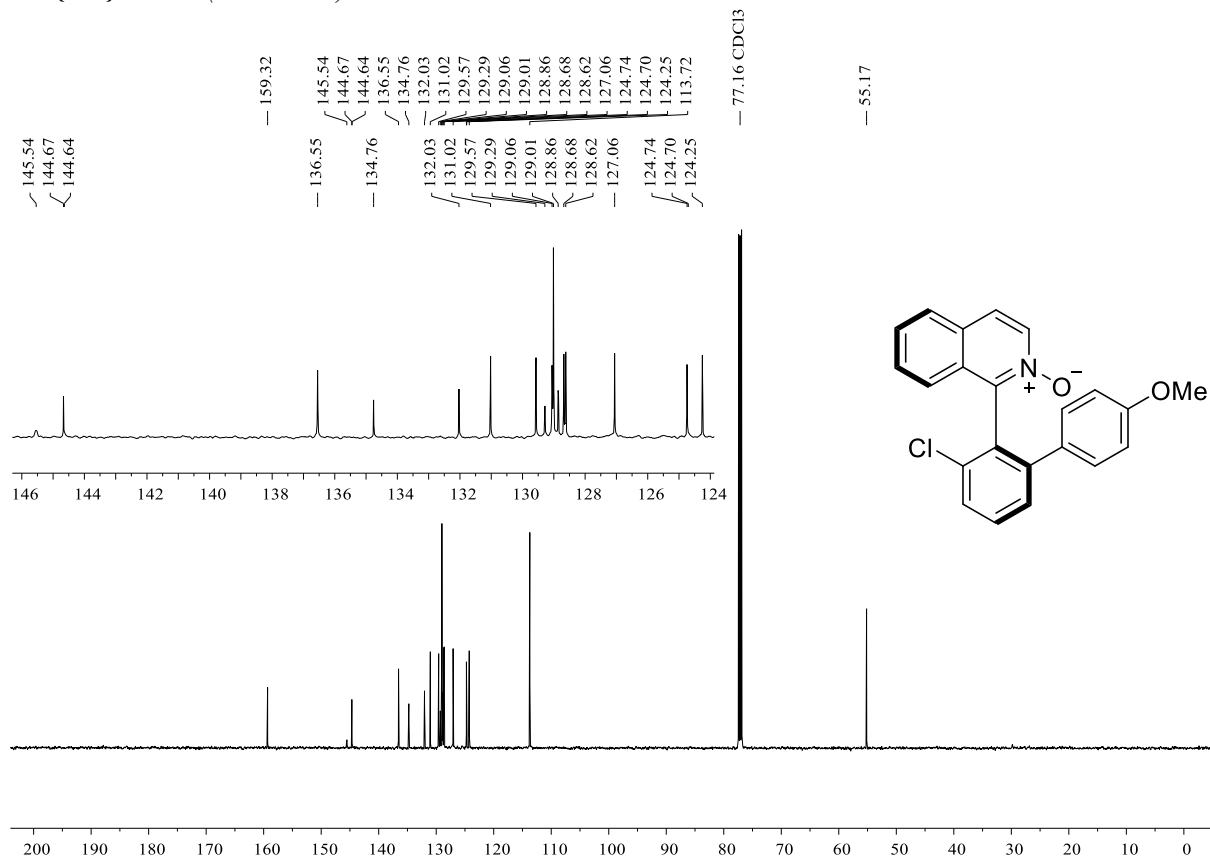

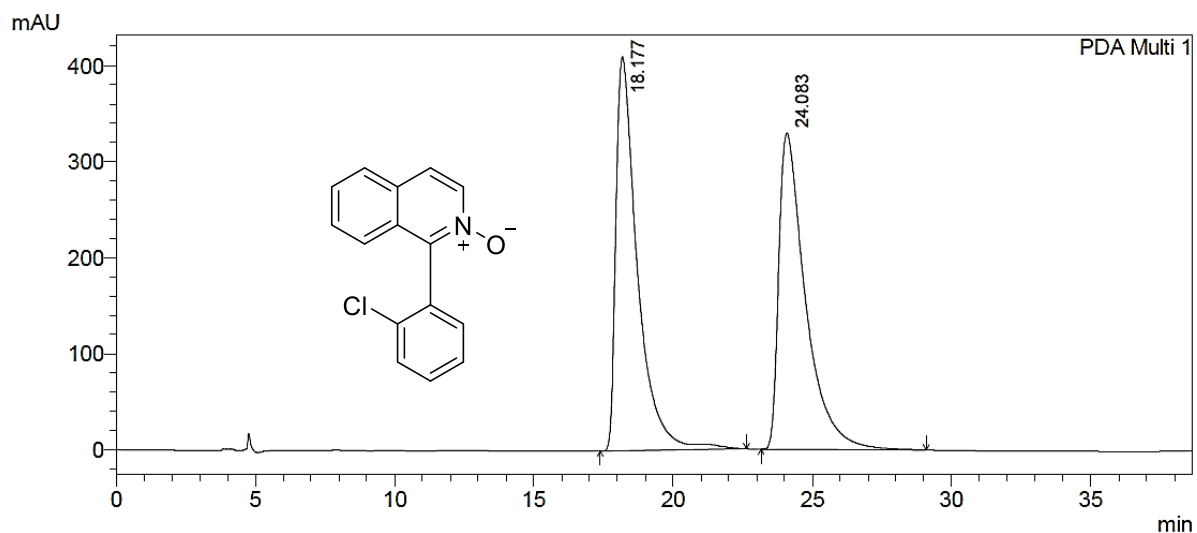

PDA Ch1 274nm 4mm

| Peak# | Ret. Time | Area     | Height | Area %  | Height % |
|-------|-----------|----------|--------|---------|----------|
| 1     | 18.177    | 22077925 | 410304 | 50.091  | 55.463   |
| 2     | 24.083    | 21997431 | 329476 | 49.909  | 44.537   |
| Total |           | 44075356 | 739780 | 100.000 | 100.000  |

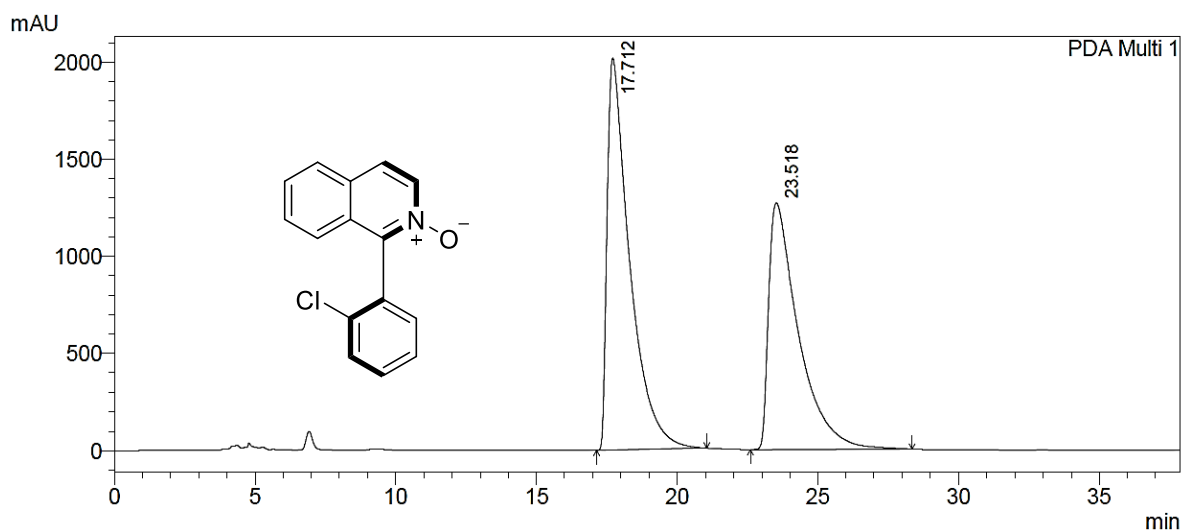

PDA Ch1 274nm 4mm

| Peak# | Ret. Time | Area      | Height  | Area %  | Height % |
|-------|-----------|-----------|---------|---------|----------|
| 1     | 17.712    | 112628101 | 2016241 | 54.793  | 61.360   |
| 2     | 23.518    | 92924575  | 1269668 | 45.207  | 38.640   |
| Total |           | 205552677 | 3285910 | 100.000 | 100.000  |

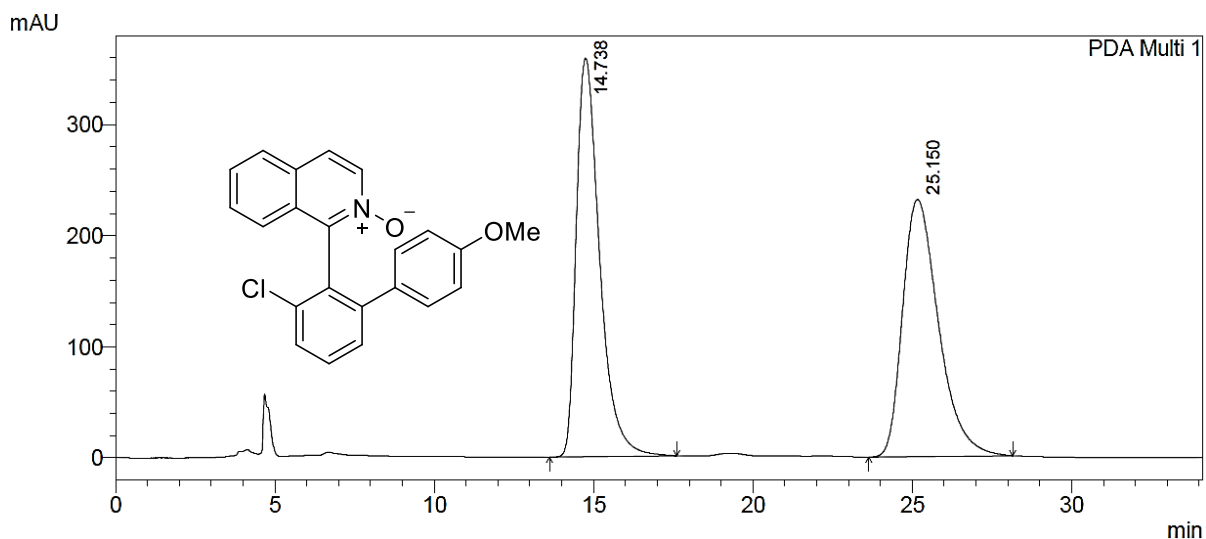

PDA Ch1 254nm 4nm

| Peak# | Ret. Time | Area     | Height | Area %  | Height % |
|-------|-----------|----------|--------|---------|----------|
| 1     | 14.738    | 18272797 | 358546 | 50.214  | 60.791   |
| 2     | 25.150    | 18117146 | 231258 | 49.786  | 39.209   |
| Total |           | 36389943 | 589804 | 100.000 | 100.000  |

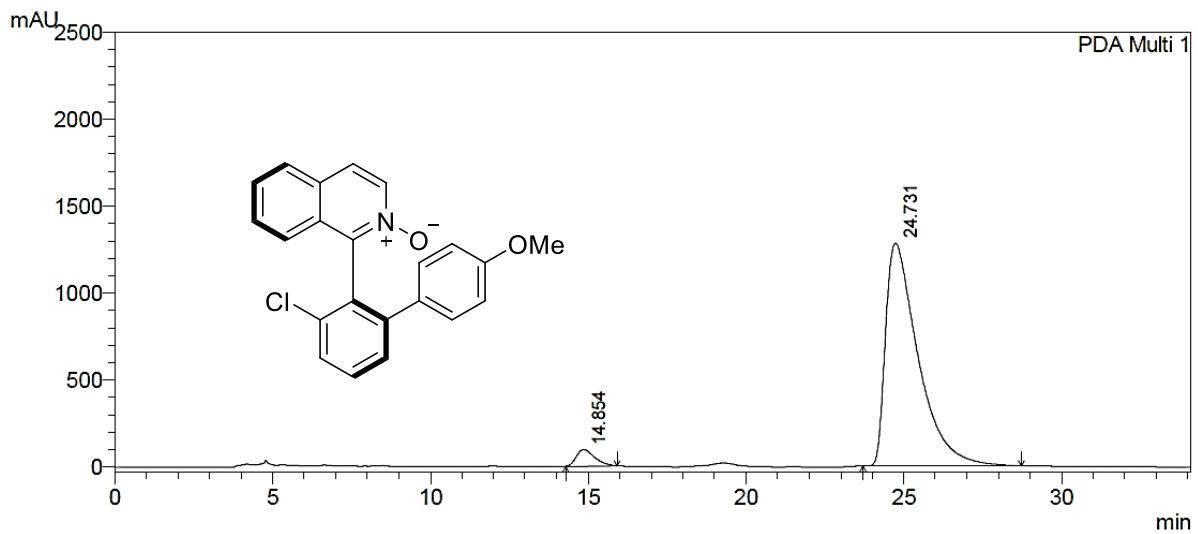

PDA Ch1 254nm 4nm

| Peak# | Ret. Time | Area     | Height  | Area %  | Height % |
|-------|-----------|----------|---------|---------|----------|
| 1     | 14.854    | 3874496  | 95994   | 4.054   | 6.979    |
| 2     | 24.731    | 91705894 | 1279479 | 95.946  | 93.021   |
| Total |           | 95580390 | 1375473 | 100.000 | 100.000  |

*(R)*-1-(4-methoxy-[1,1':3',1''-terphenyl]-2'-yl)isoquinoline 2-oxide (**3t**)

$^1\text{H}$  NMR (500 MHz)

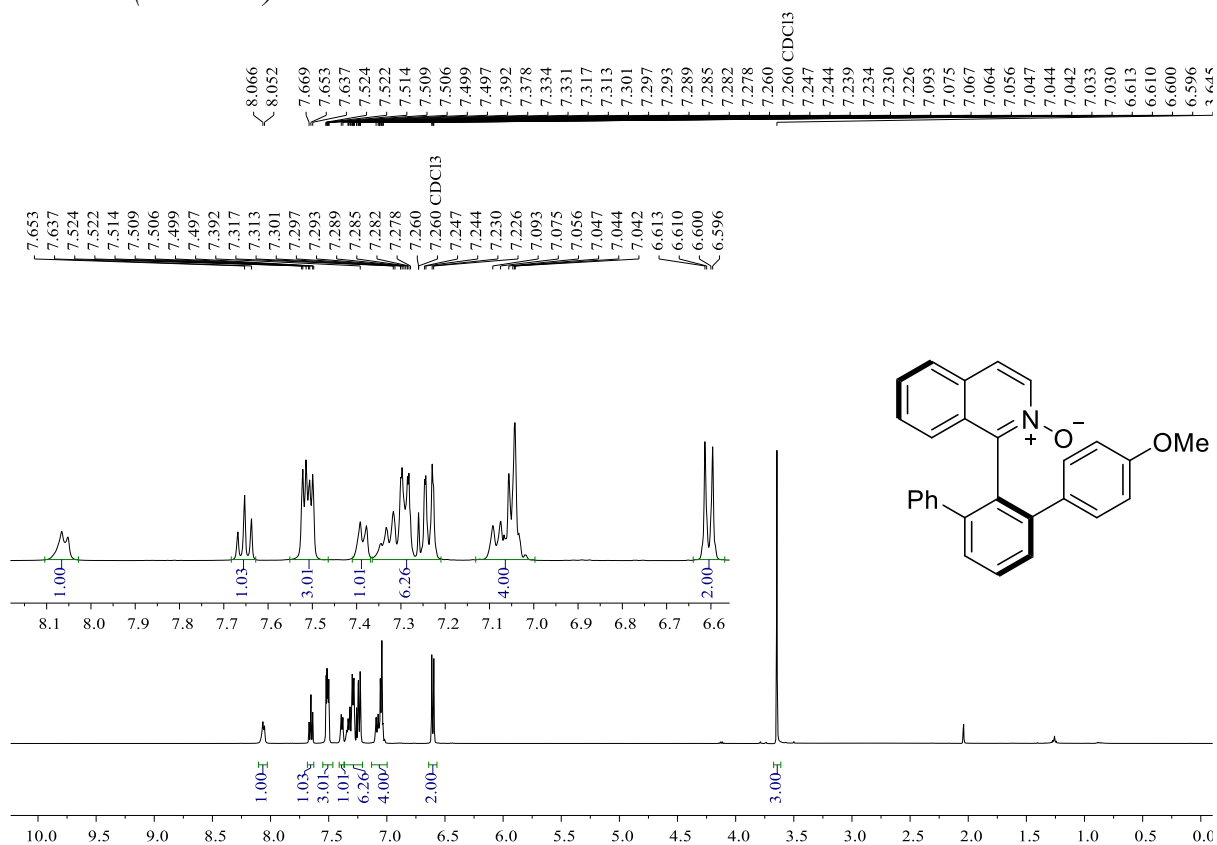

$^{13}\text{C}\{^1\text{H}\}$  NMR (125 MHz)

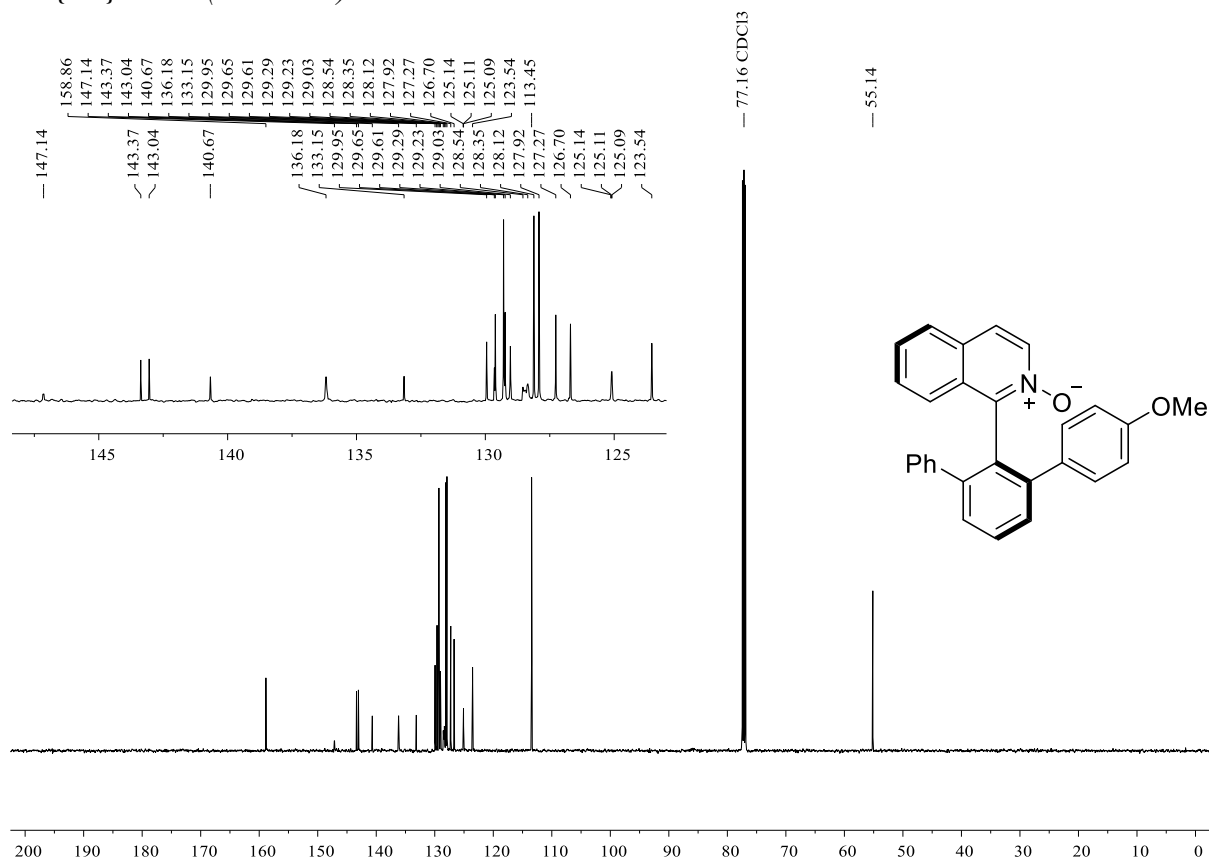

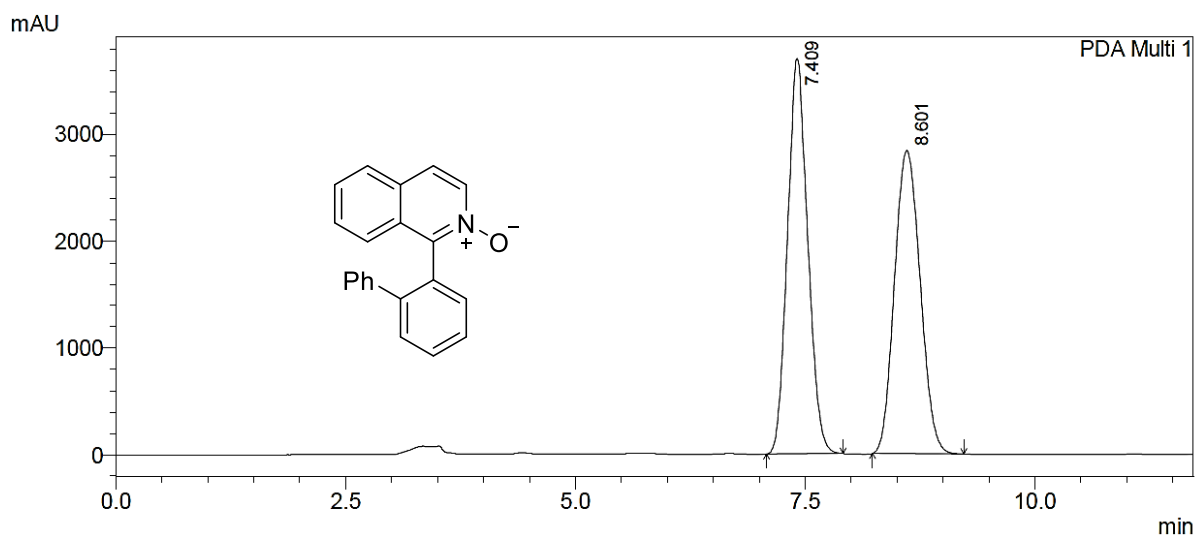

PDA Ch1 254nm 4mm

| Peak# | Ret. Time | Area      | Height  | Area %  | Height % |
|-------|-----------|-----------|---------|---------|----------|
| 1     | 7.409     | 56721634  | 3702017 | 50.647  | 56.557   |
| 2     | 8.601     | 55272129  | 2843585 | 49.353  | 43.443   |
| Total |           | 111993763 | 6545602 | 100.000 | 100.000  |

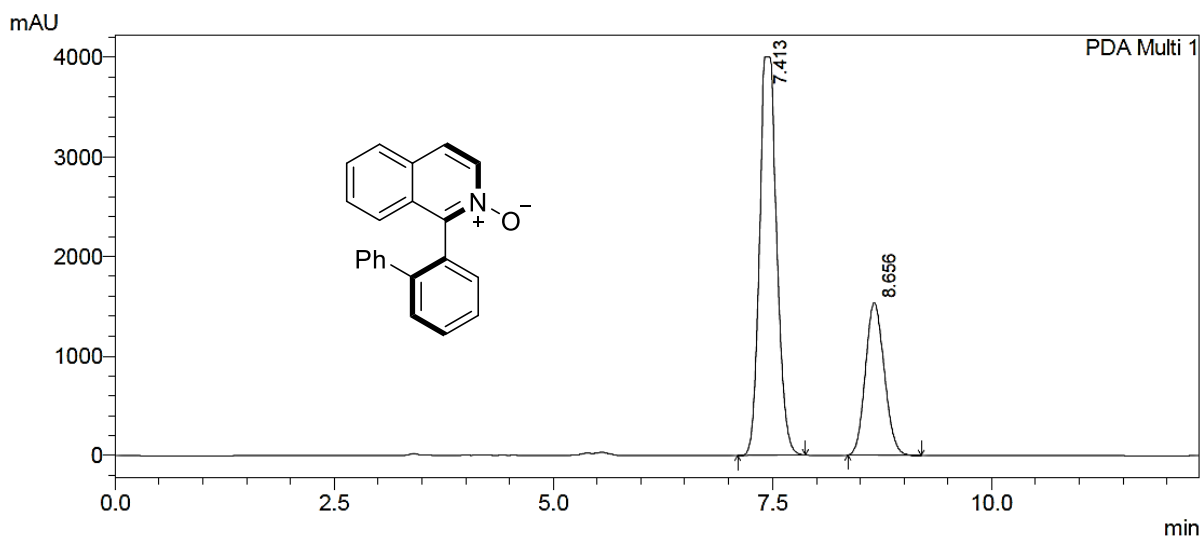

PDA Ch1 254nm 4mm

| Peak# | Ret. Time | Area     | Height  | Area %  | Height % |
|-------|-----------|----------|---------|---------|----------|
| 1     | 7.413     | 54709013 | 3997009 | 70.474  | 72.302   |
| 2     | 8.656     | 22920586 | 1531240 | 29.526  | 27.698   |
| Total |           | 77629599 | 5528249 | 100.000 | 100.000  |



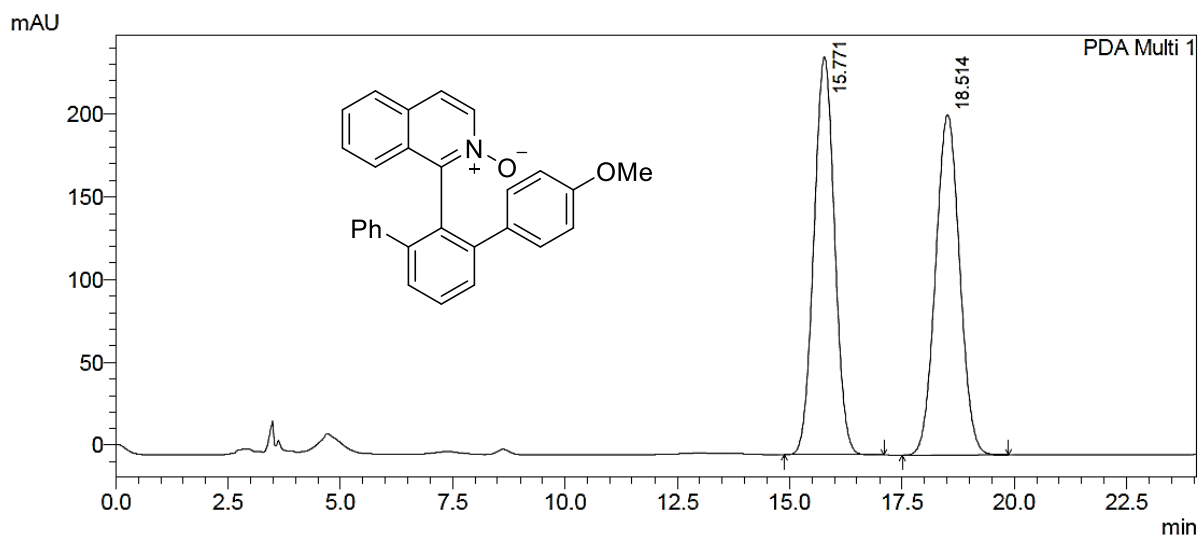

PDA Ch1 274nm 4nm

| Peak# | Ret. Time | Area     | Height | Area %  | Height % |
|-------|-----------|----------|--------|---------|----------|
| 1     | 15.771    | 7686236  | 240414 | 49.969  | 53.893   |
| 2     | 18.514    | 7695635  | 205681 | 50.031  | 46.107   |
| Total |           | 15381872 | 446095 | 100.000 | 100.000  |

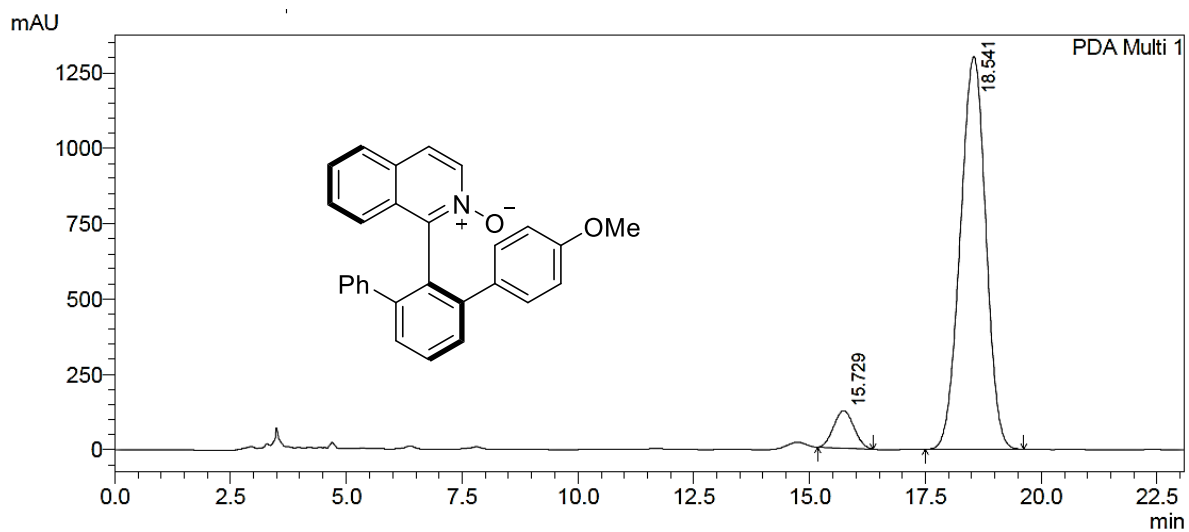

PDA Ch1 274nm 4nm

| Peak# | Ret. Time | Area     | Height  | Area %  | Height % |
|-------|-----------|----------|---------|---------|----------|
| 1     | 15.729    | 3779905  | 123795  | 7.035   | 8.685    |
| 2     | 18.541    | 49953055 | 1301567 | 92.965  | 91.315   |
| Total |           | 53732960 | 1425362 | 100.000 | 100.000  |

*(R)*-1-(3-isopropyl-4'-methoxy-[1,1'-biphenyl]-2-yl)isoquinoline 2-oxide (**3u**)

<sup>1</sup>H NMR (500 MHz)

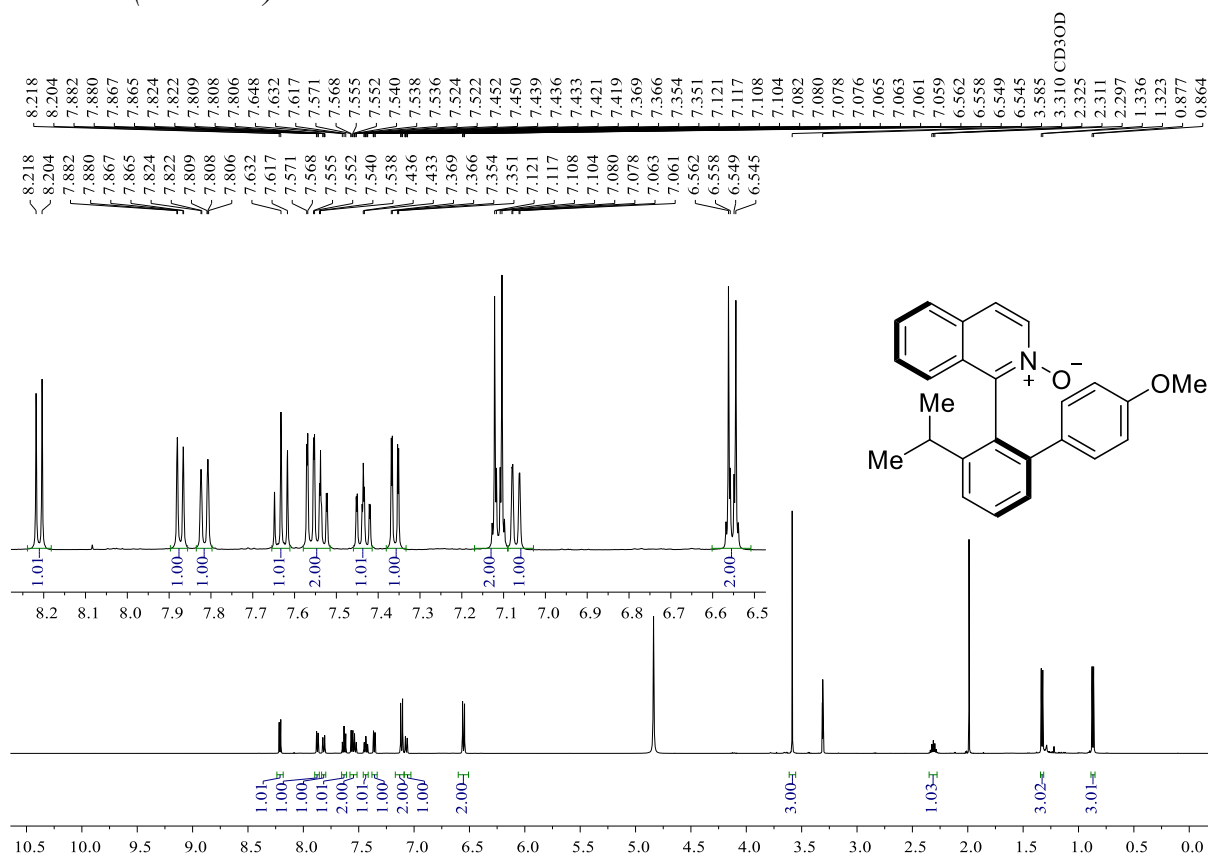

<sup>13</sup>C{<sup>1</sup>H} NMR (125 MHz)

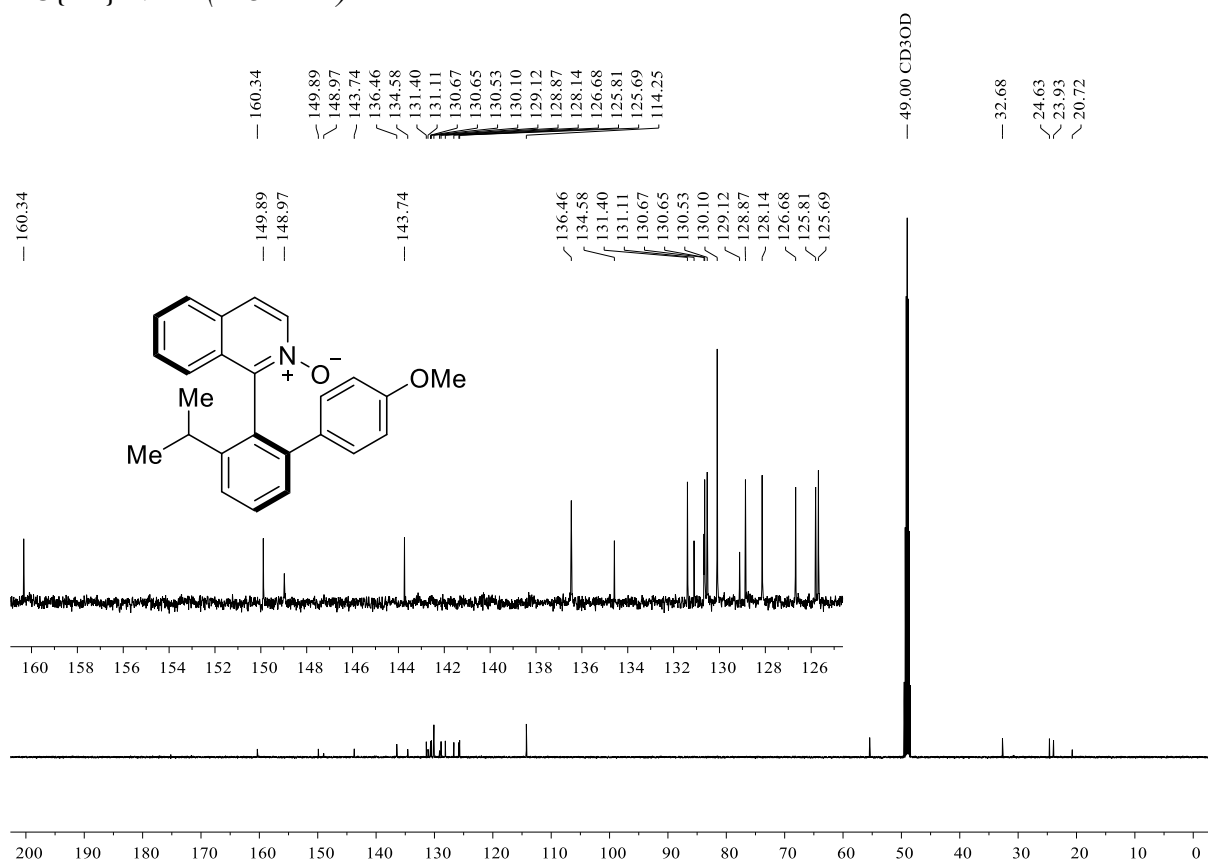

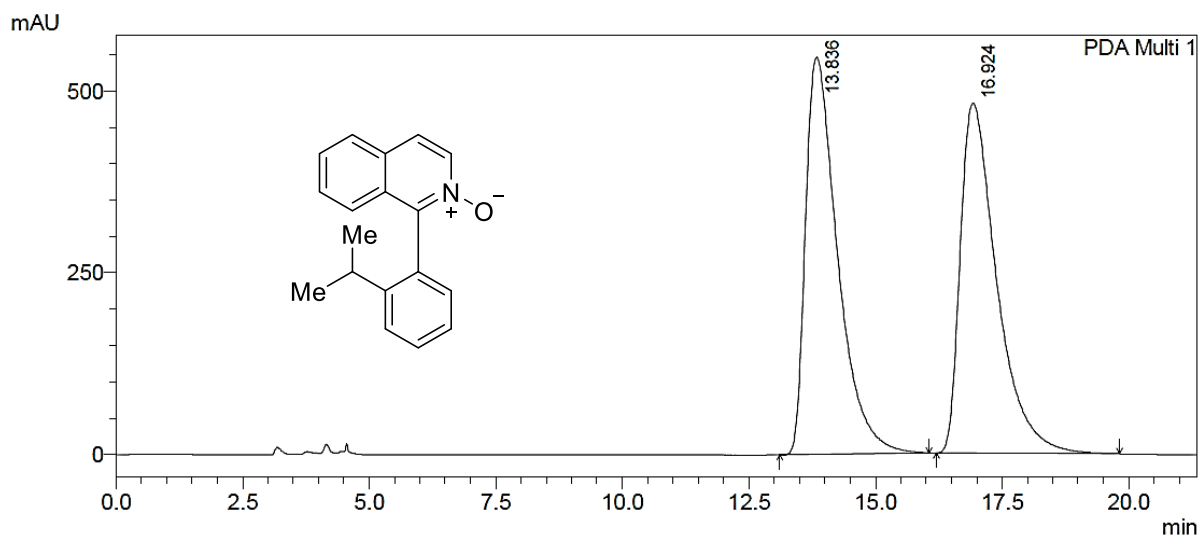

PDA Ch1 254nm 4nm

| Peak# | Ret. Time | Area     | Height  | Area %  | Height % |
|-------|-----------|----------|---------|---------|----------|
| 1     | 13.836    | 24115451 | 546843  | 49.995  | 53.148   |
| 2     | 16.924    | 24120279 | 482056  | 50.005  | 46.852   |
| Total |           | 48235729 | 1028899 | 100.000 | 100.000  |

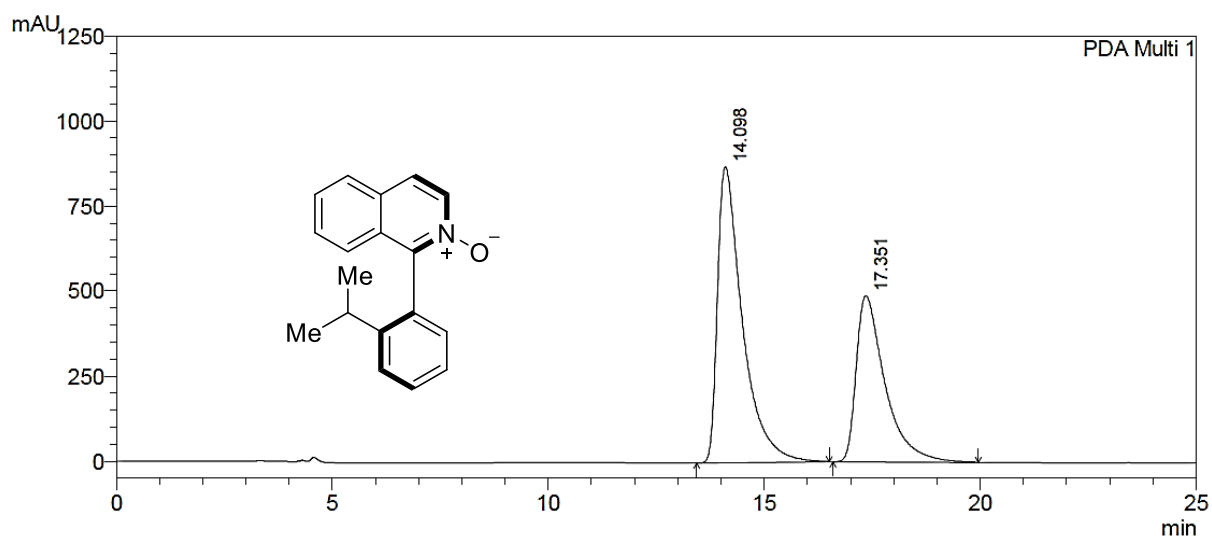

PDA Ch1 254nm 4nm

| Peak# | Ret. Time | Area     | Height  | Area %  | Height % |
|-------|-----------|----------|---------|---------|----------|
| 1     | 14.098    | 34973351 | 870988  | 60.726  | 64.070   |
| 2     | 17.351    | 22618439 | 488436  | 39.274  | 35.930   |
| Total |           | 57591791 | 1359424 | 100.000 | 100.000  |

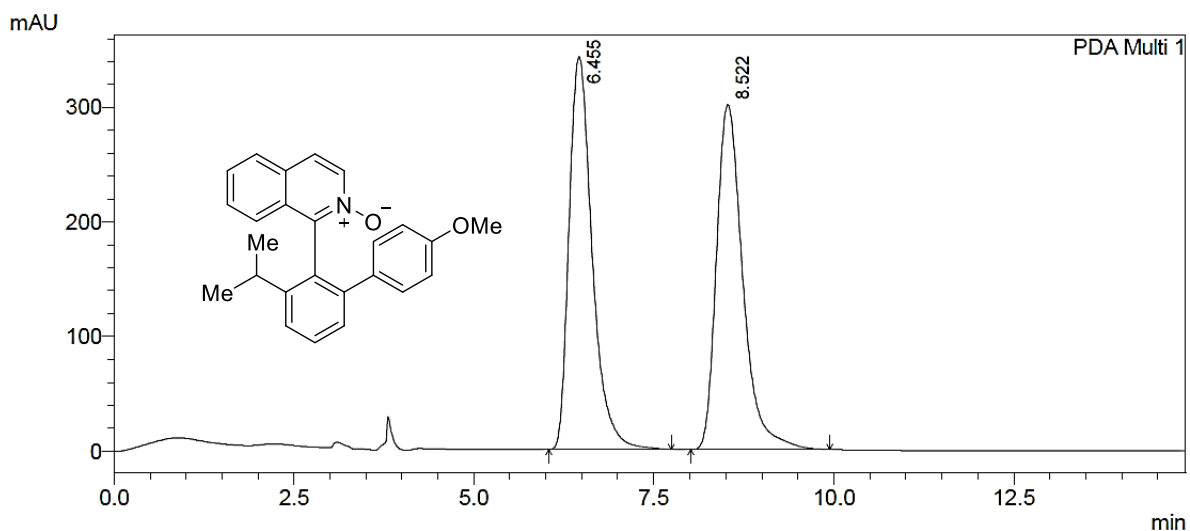

PDA Ch1 254nm 4nm

| Peak# | Ret. Time | Area     | Height | Area %  | Height % |
|-------|-----------|----------|--------|---------|----------|
| 1     | 6.455     | 7664254  | 342771 | 49.977  | 53.254   |
| 2     | 8.522     | 7671197  | 300884 | 50.023  | 46.746   |
| Total |           | 15335451 | 643654 | 100.000 | 100.000  |

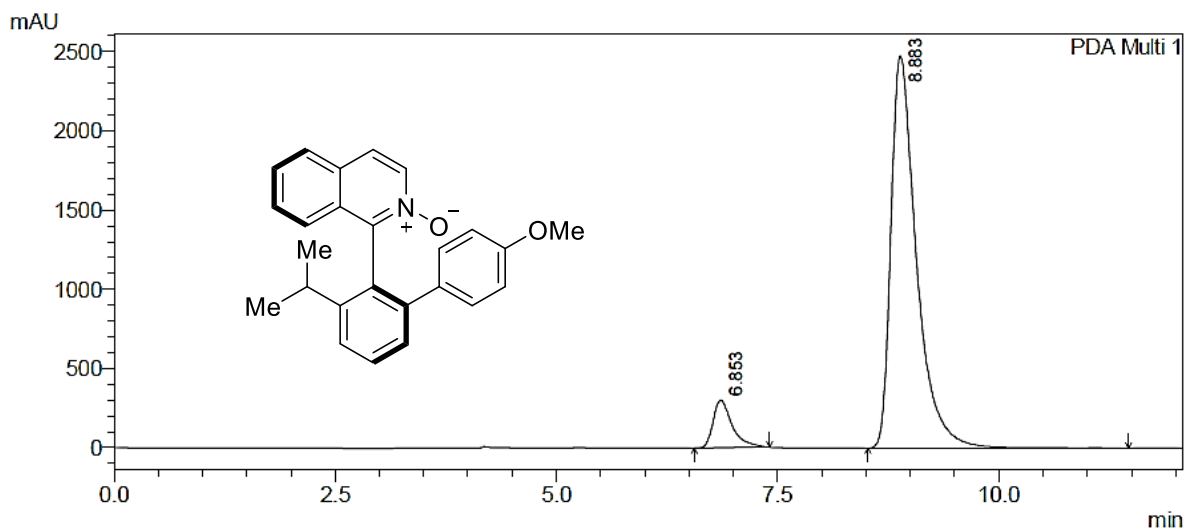

PDA Ch1 254nm 4nm

| Peak# | Ret. Time | Area     | Height  | Area %  | Height % |
|-------|-----------|----------|---------|---------|----------|
| 1     | 6.853     | 4515510  | 301682  | 8.315   | 10.865   |
| 2     | 8.883     | 49786975 | 2474944 | 91.685  | 89.135   |
| Total |           | 54302485 | 2776626 | 100.000 | 100.000  |

*(R)*-1-(3-(benzyloxy)-4'-methoxy-[1,1'-biphenyl]-2-yl)isoquinoline 2-oxide (**3v**)

<sup>1</sup>H NMR (500 MHz)

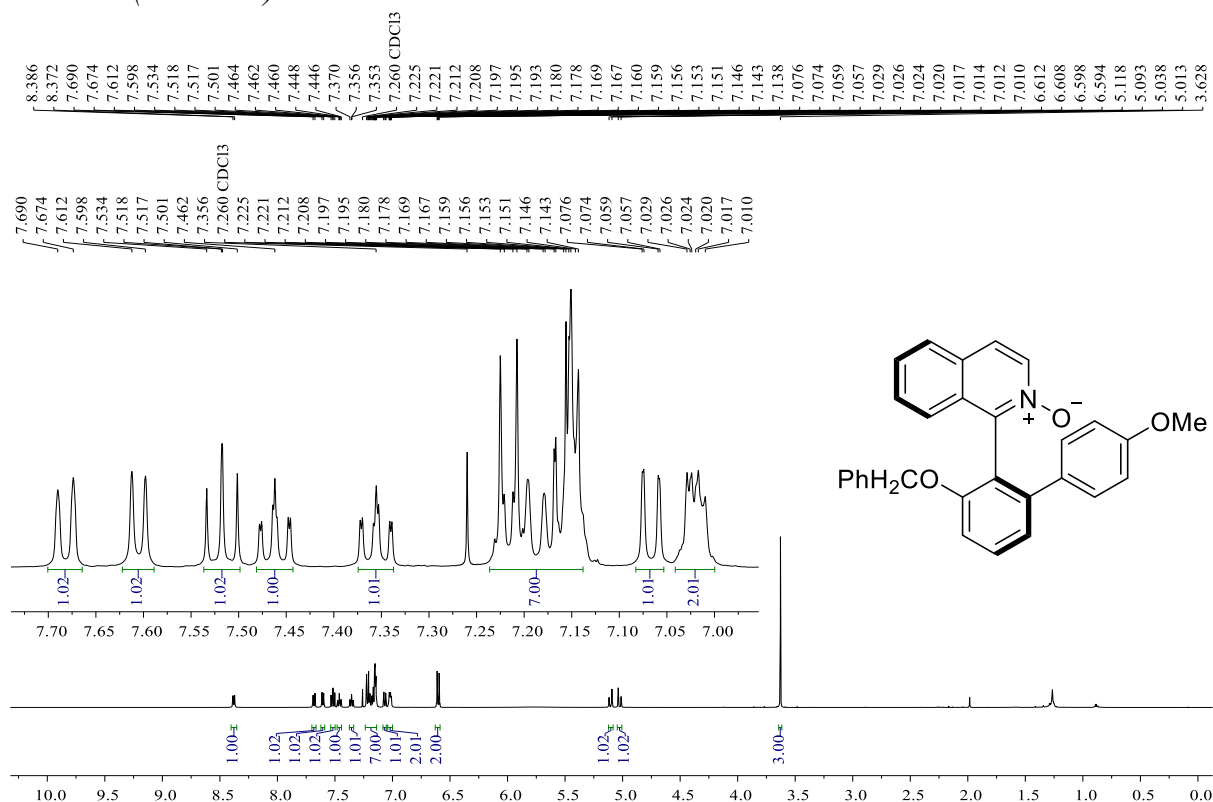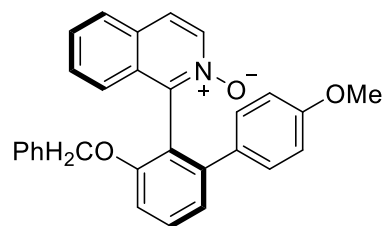

<sup>13</sup>C{<sup>1</sup>H} NMR (125 MHz)

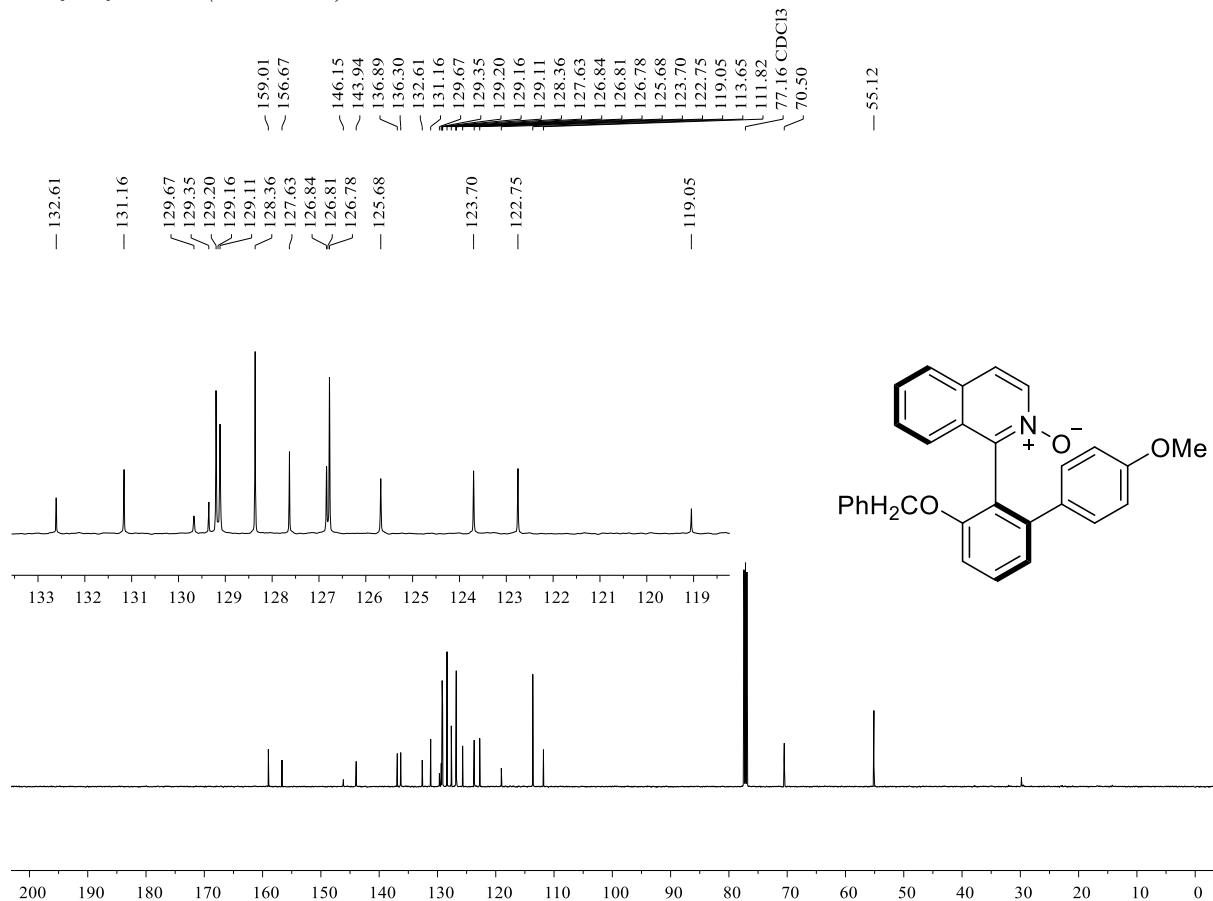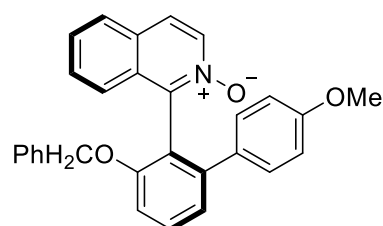

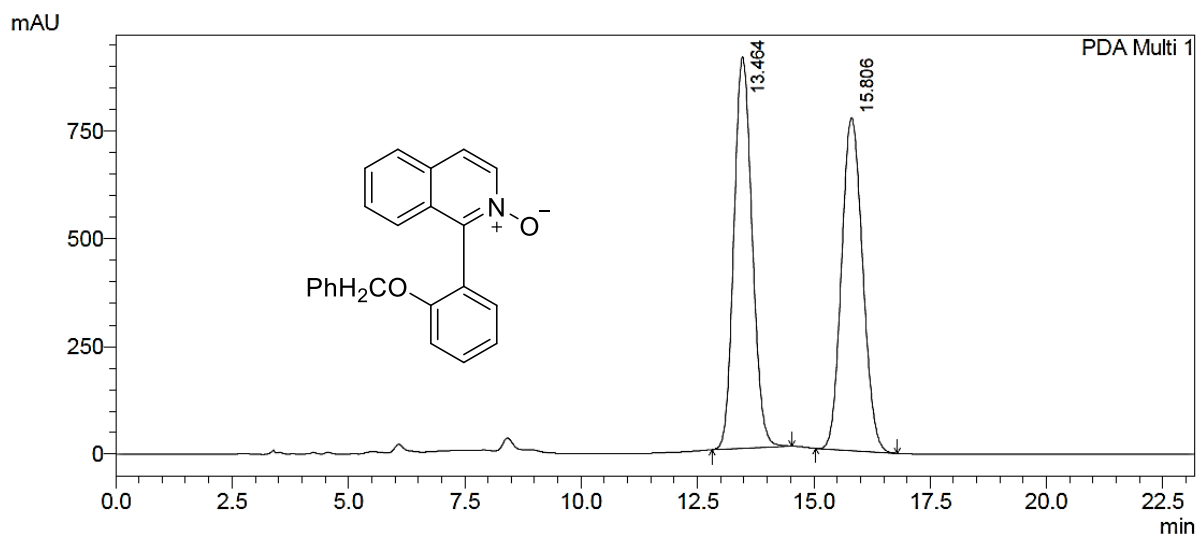

PDA Ch1 274nm 4mm

| Peak# | Ret. Time | Area     | Height  | Area %  | Height % |
|-------|-----------|----------|---------|---------|----------|
| 1     | 13.464    | 24693300 | 906288  | 50.330  | 54.018   |
| 2     | 15.806    | 24369421 | 771460  | 49.670  | 45.982   |
| Total |           | 49062721 | 1677748 | 100.000 | 100.000  |

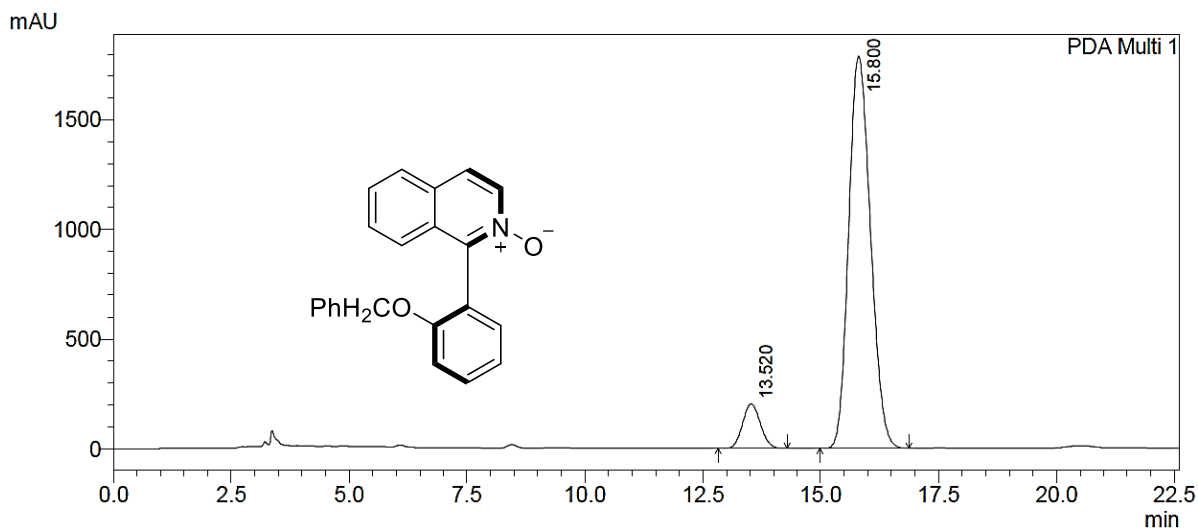

PDA Ch1 274nm 4mm

| Peak# | Ret. Time | Area     | Height  | Area %  | Height % |
|-------|-----------|----------|---------|---------|----------|
| 1     | 13.520    | 5347311  | 203893  | 8.498   | 10.234   |
| 2     | 15.800    | 57574866 | 1788384 | 91.502  | 89.766   |
| Total |           | 62922177 | 1992278 | 100.000 | 100.000  |

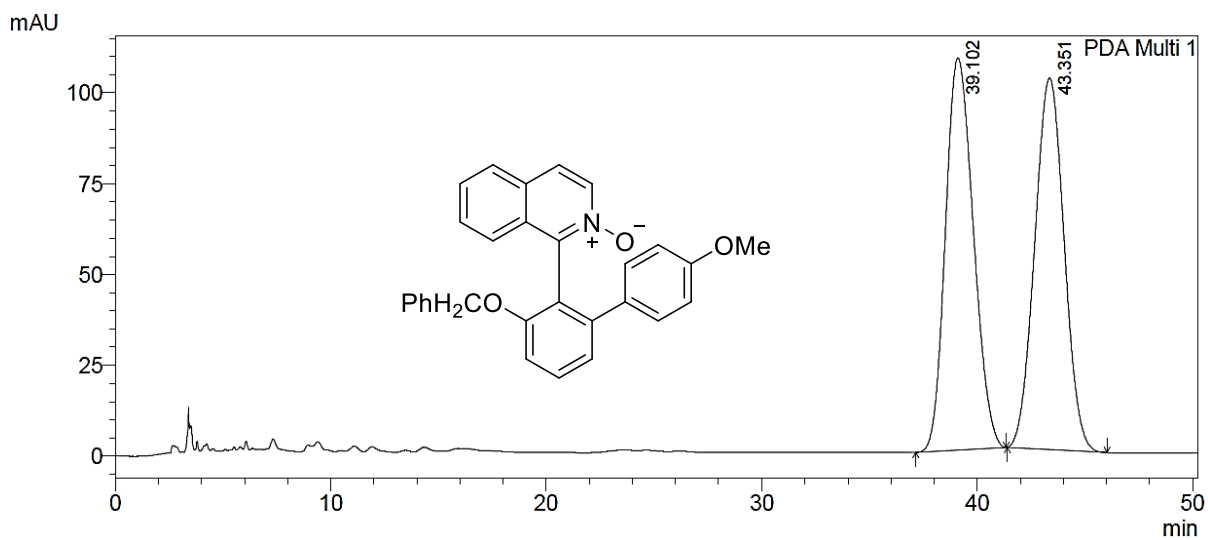

PDA Ch1 274nm 4mm

| Peak# | Ret. Time | Area     | Height | Area %  | Height % |
|-------|-----------|----------|--------|---------|----------|
| 1     | 39.102    | 9730926  | 108024 | 50.020  | 51.341   |
| 2     | 43.351    | 9723120  | 102382 | 49.980  | 48.659   |
| Total |           | 19454045 | 210405 | 100.000 | 100.000  |

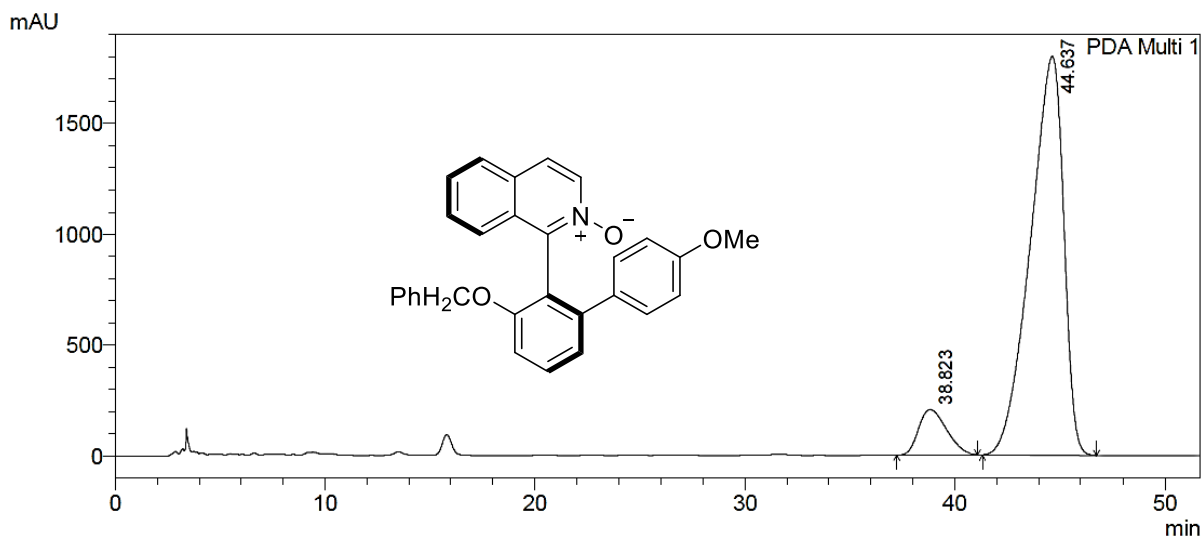

PDA Ch1 274nm 4mm

| Peak# | Ret. Time | Area      | Height  | Area %  | Height % |
|-------|-----------|-----------|---------|---------|----------|
| 1     | 38.823    | 18989006  | 205081  | 8.759   | 10.235   |
| 2     | 44.637    | 197810737 | 1798692 | 91.241  | 89.765   |
| Total |           | 216799744 | 2003773 | 100.000 | 100.000  |

*(R)*-1-(2-(4-methoxyphenyl)naphthalen-1-yl)isoquinoline (**4a**)

<sup>1</sup>H NMR (600 MHz)

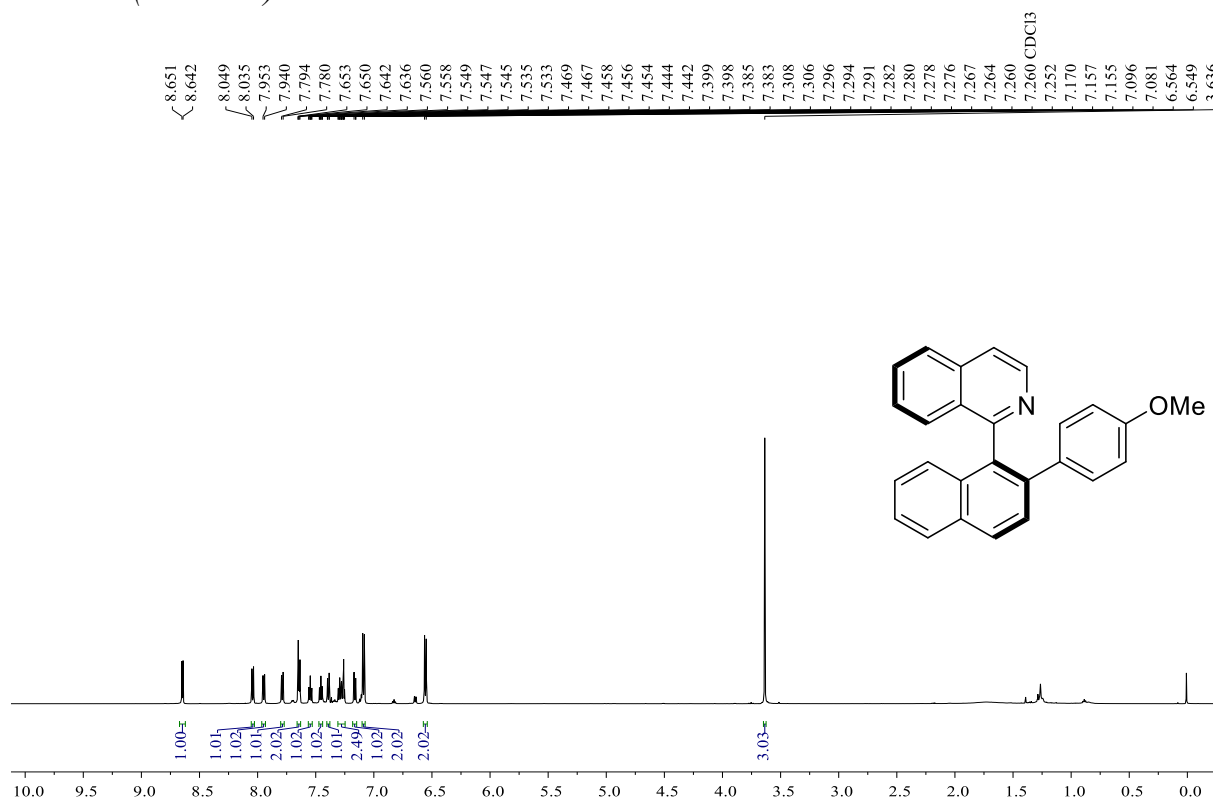

<sup>13</sup>C{<sup>1</sup>H} NMR (150 MHz)

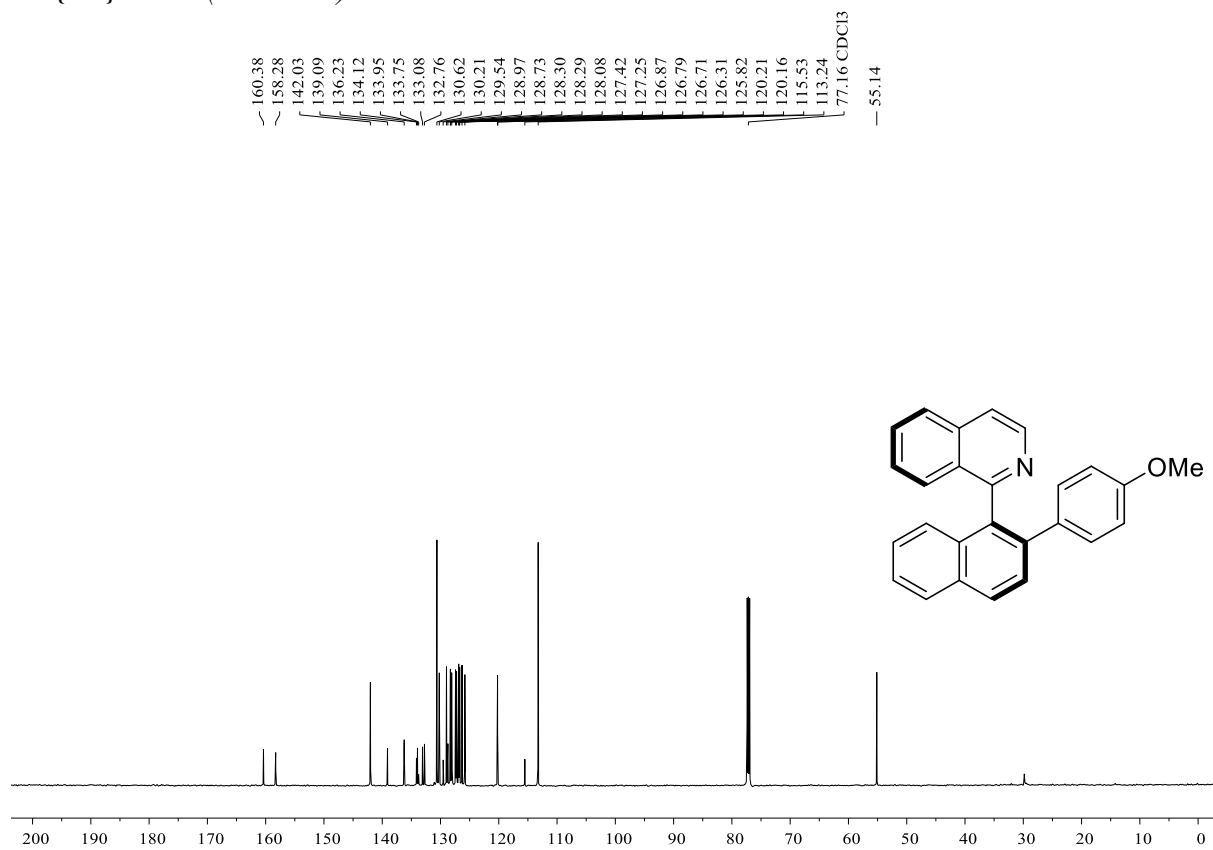



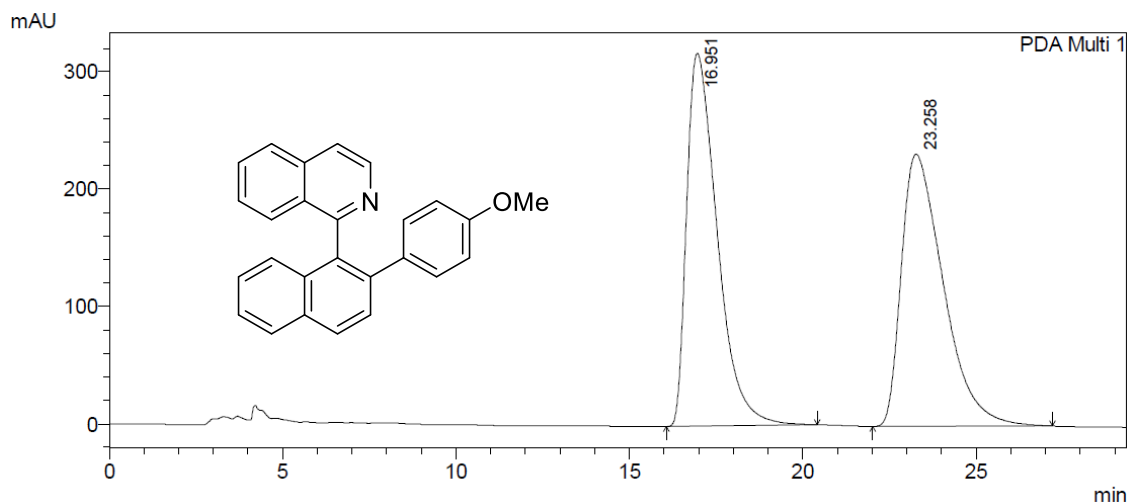

PDA Ch1 254nm 4nm

| Peak# | Ret. Time | Area     | Height | Area %  | Height % |
|-------|-----------|----------|--------|---------|----------|
| 1     | 16.951    | 19489559 | 317755 | 49.981  | 57.812   |
| 2     | 23.258    | 19504382 | 231882 | 50.019  | 42.188   |
| Total |           | 38993941 | 549638 | 100.000 | 100.000  |

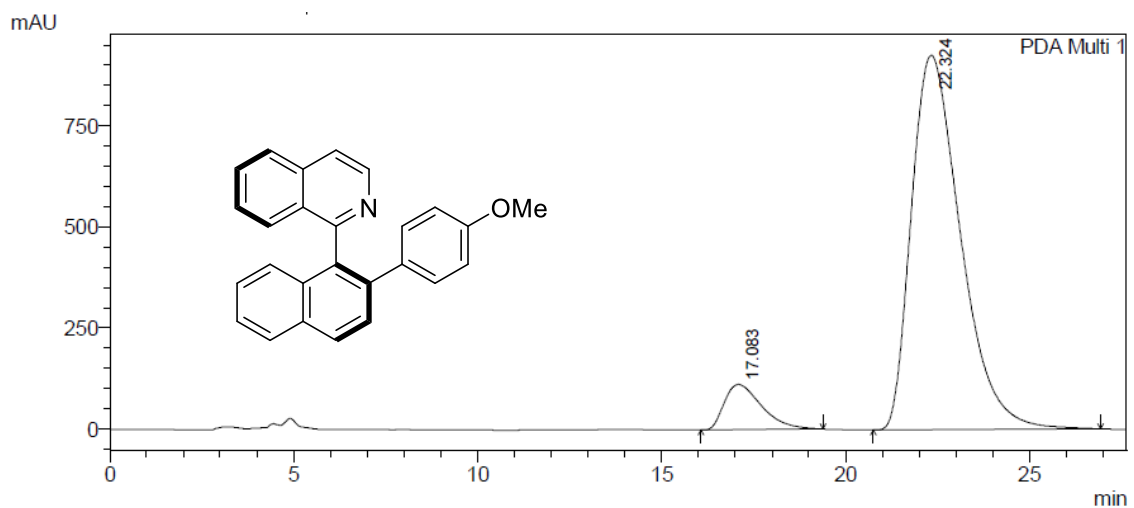

PDA Ch1 254nm 4nm

| Peak# | Ret. Time | Area     | Height  | Area %  | Height % |
|-------|-----------|----------|---------|---------|----------|
| 1     | 17.083    | 7957897  | 112287  | 8.448   | 10.815   |
| 2     | 22.324    | 86242815 | 925936  | 91.552  | 89.185   |
| Total |           | 94200712 | 1038224 | 100.000 | 100.000  |

## 8. Computational Data

### Computational Methods

The DFT calculations were performed using Gaussian 16.A03 program.<sup>2</sup> The geometry optimizations were performed with B3LYP<sup>3</sup> functional with Grimme's D3-dispersion correction including Becke-Johanson damping<sup>4</sup> (B3LYP-D3BJ) was used. The SDD<sup>5</sup> basis set with associated effective core potential (ECP) was used for Pd, whereas 6-31G\*\* basis set<sup>6</sup> were used for all other atoms. The implicit solvation method SMD<sup>7</sup> was used with HFIP as solvent. Hessian calculations were performed to confirm stationary points. The minima have no imaginary frequency and single imaginary frequency for transition states. The energies of stationary points were computed using cc-PVTZ-PP basis set for Pd with ECP28MDF pseudopotentials<sup>8</sup> and 6-311+G\*\* basis set for other atoms. The cc-PVTZPP basis set and ECP28MDF pseudopotentials were downloaded from the Stuttgart/Cologne group website.<sup>9</sup> The energies of stationary points were computed using 6-311+G\*\* basis set. The quasi-harmonic entropy corrections proposed by Grimme<sup>10</sup> with a cutoff of 100 cm<sup>-1</sup>, correction for standard state of 1 M for all species, and free energy corrections at 333.15 K were computed using GoodVibes v3.0.1 program.<sup>11</sup> Pymol program was used to generate molecular images.<sup>12</sup>

HFIP solvent is not implemented in Gaussian16 program, so we used "Solvent=Generic, Read" options in the SCRF keyword. Following parameters were used for the HFIP solvent,<sup>13</sup>

Eps=16.7  
EpsInf=1.62562  
HbondAcidity=0.77  
HbondBasicity=0.10  
SurfaceTensionAtInterface=23.23  
CarbonAromaticity=0.0  
ElectronegativeHalogenicity=0.6

The rate of a reaction (enantiomerization,  $k_{\text{Ent}}$ ), rate of racemization ( $k_{\text{Rac}}$ ), and half-life for racemization ( $t_{1/2}$ ) were calculated by using following formula.<sup>14</sup>

$$k_{\text{Ent}} = \kappa \frac{k_{\text{B}}T}{h} \exp \frac{-\Delta G^{\ddagger}}{RT} \quad (\text{Eyring Equation})$$

$$k_{\text{Rac}} = 2k_{\text{Ent}}$$

$$t_{1/2} = \frac{\ln 2}{k_{\text{Rac}}}$$

where transmission constant,  $\kappa = 1$ , Boltzmann constant,  $k_{\text{B}} = 1.3806488 \times 10^{-23}$  J.K<sup>-1</sup>, Planck constant,  $h = 6.62606957 \times 10^{-34}$  J.s, ideal gas constant,  $R = 8.314462145$ , temperature,  $T = 333.15$  K, and barrier for enantiomerization ( $\Delta G^{\ddagger}$ ) is calculated using DFT.

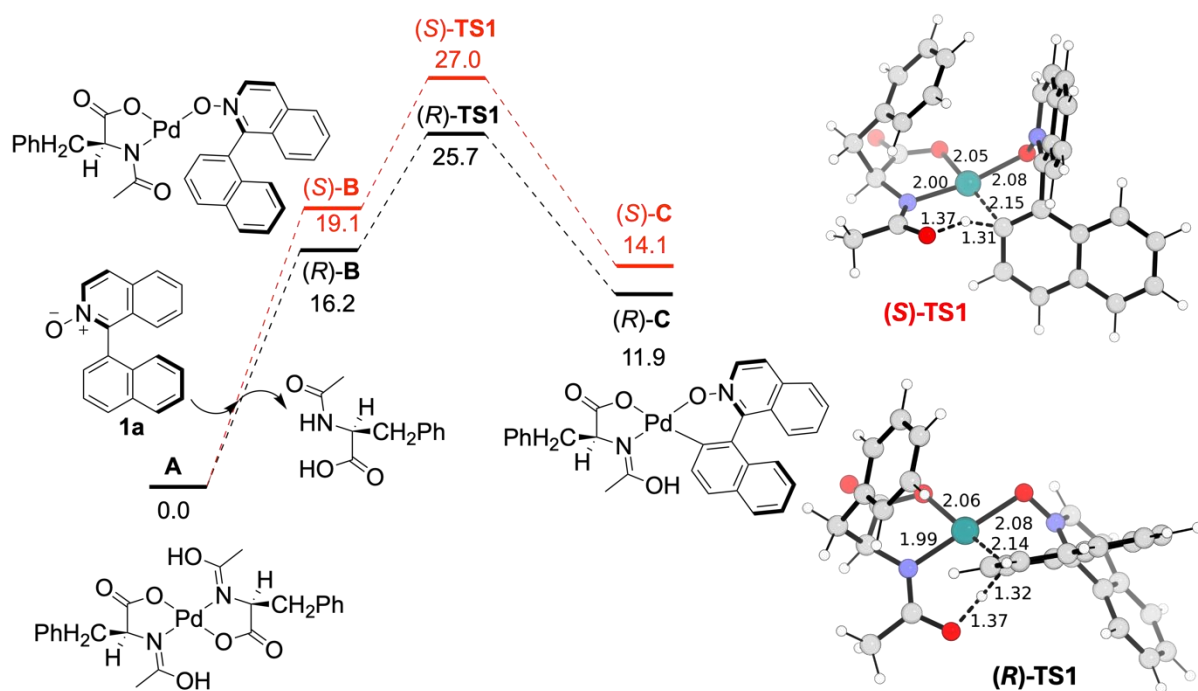

**Figure S1.** The free energy profile for Pd-catalyzed C-H activation of substrate **1a** enantiomers.

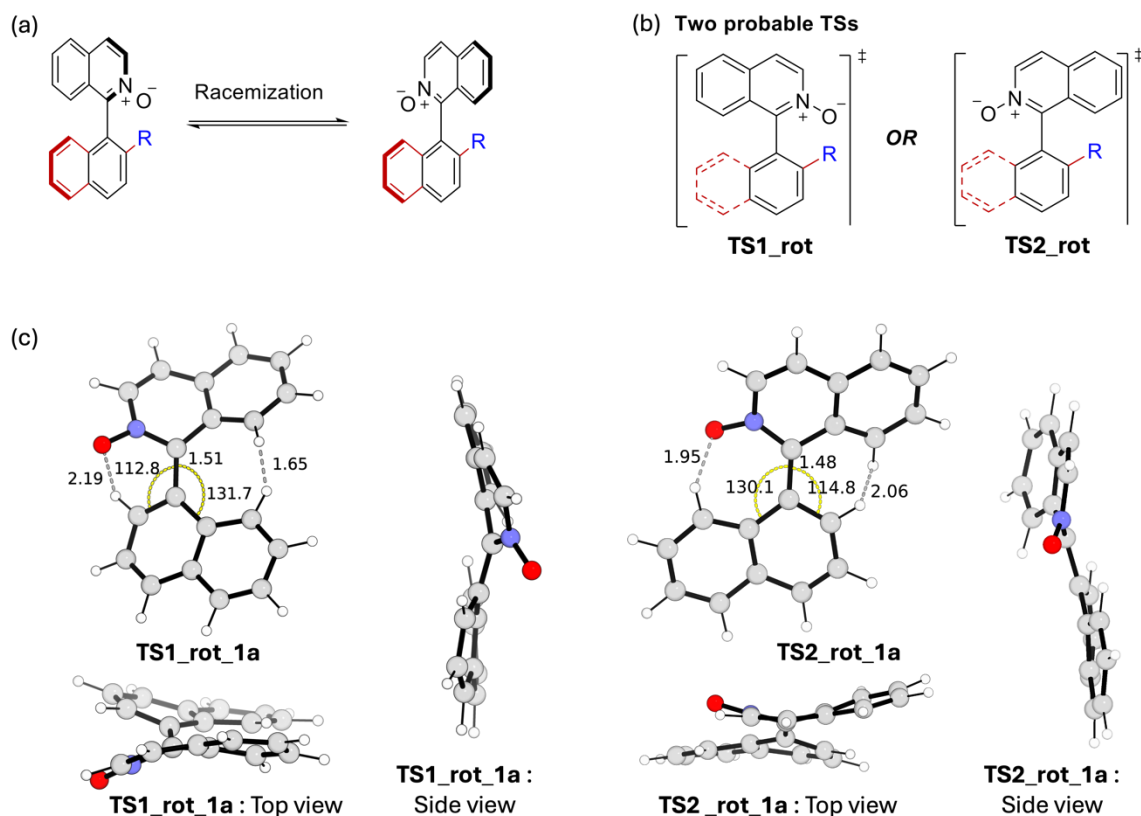

**Figure S2.** Schematic representation of (a) racemization process and (b) the two probable transition states (TSs). (c) The molecular images of optimized geometry of **TS1\_rot** and **TS2\_rot** for substrate **1a**. The optimized geometries show the high distortion in the TS even for substrate **1a**. The two aromatic rings are bend in different direction and the atom connecting the rings are slightly pushed out of the plane of the ring.

For substrates **1a** and **1b** (R = H) the **TS2\_rot** is lower in energy than **TS1\_rot** by around 6 and 4 kcal/mol, respectively (Table S1). The barrier for rotation around C-C bond between aromatic carbons is 32.1 kcal/mol. **TS1\_rot** is higher in energy as bulky groups are on the same side, whereas for **TS2\_rot**, the bulkier groups of two ring are away from each other leading to less distortion (Figure S1).

For substituted products, the barrier for rotation increases as now both sides of substituted-naphthyl ring are bulky leading to higher barrier for rotation (>40 kcal/mol). Also, the difference in energy of two TSs (**TS1\_rot** and **TS2\_rot**) reduces to around 2 kcal/mol.

**Table S1.** The DFT computed free energy barrier (kcal/mol) and half-life for racemization for selected substrates and products in HFIP solvent at 333.15 K (60 °C) temperature

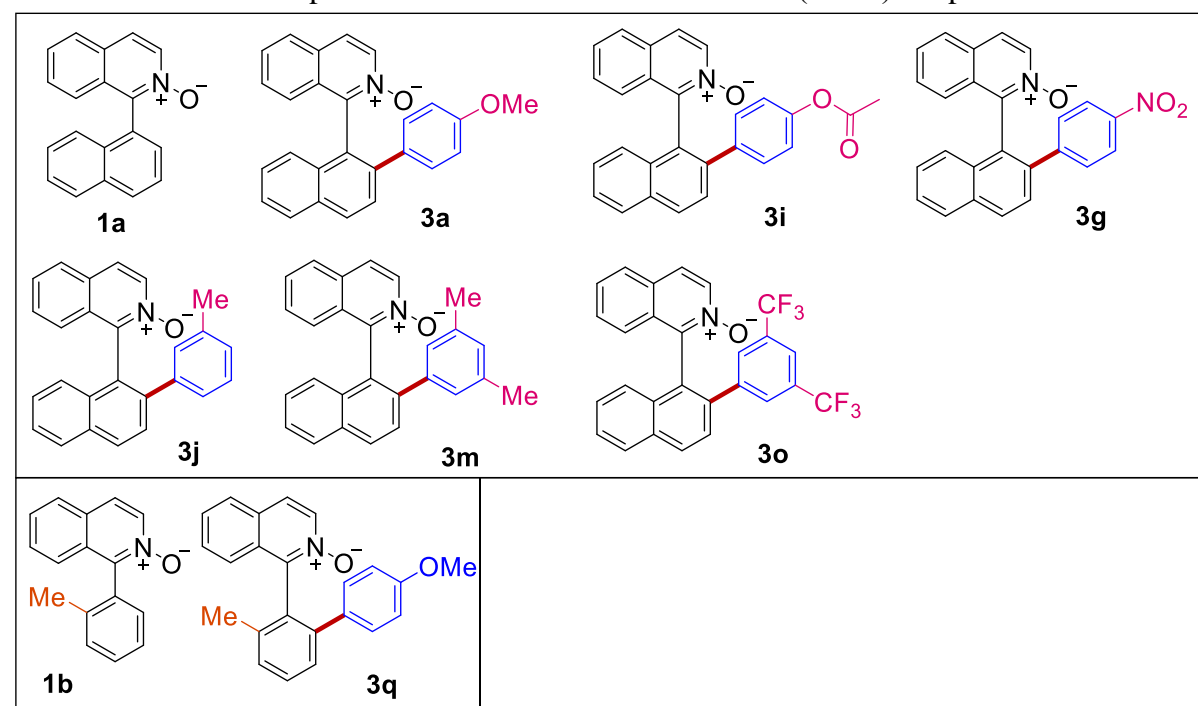

|           | $\Delta G^\ddagger$ (TS1_rot) | $\Delta G^\ddagger$ (TS2_rot) | $t_{1/2}^a$          |
|-----------|-------------------------------|-------------------------------|----------------------|
| <b>1a</b> | 38.1                          | <b>32.1</b>                   | 665.6 d <sup>b</sup> |
| <b>3a</b> | 42.4                          | <b>41.2</b>                   | $1.6 \times 10^6$ y  |
| <b>3i</b> | 42.7                          | <b>41.5</b>                   | $2.8 \times 10^6$ y  |
| <b>3g</b> | 41.8                          | <b>41.1</b>                   | $1.5 \times 10^6$ y  |
| <b>3j</b> | 42.2                          | - <sup>c</sup>                | $8.2 \times 10^6$ y  |
| <b>3m</b> | 42.6                          | - <sup>c</sup>                | $1.4 \times 10^7$ y  |
| <b>3o</b> | 41.7                          | - <sup>c</sup>                | $3.7 \times 10^6$ y  |
| <b>1b</b> | 36.1                          | <b>32.1</b>                   | 640.8 d <sup>b</sup> |
| <b>3q</b> | 43.8                          | <b>42.2</b>                   | $7.5 \times 10^6$ y  |

<sup>a</sup> Here, s = seconds, h = hours, d = days, y = years. <sup>b</sup> Energies are same, but  $t_{1/2}$  values are different as energies are shown only for a single decimal, but  $t_{1/2}$  is calculated from barrier computed using energy of stationary points with more decimal points. <sup>c</sup> TS geometry could not be optimized, hence the barrier is calculated using the other TS, although it may not be of lowest energy. As the difference in free energy barrier for two TSs (TS1\_rot and TS2\_rot) is smaller (<1.5 kcal/mol) for other products (**3a**, **3i**, and **3g**), the barrier of the TS2\_rot for products, **3j**, **3m**, **3o** is also expected to >40 kcal/mol. For 40 kcal/mol barrier at 333.15 K temperature, the  $t_{1/2}$  for racemization is  $2.7 \times 10^5$  years.

**Table S2.** Computed total electronic energies ( $E_{\text{SPC}}$ ), total electronic energy ( $E$ ) at the method used for geometry optimization, enthalpy ( $H_{\text{SPC}}$ ), temperature\*entropy ( $T.S$ ) term,  $T.S$  with quasiharmonic correction by Grimme ( $T.qh-S$ ), and free energy (with quasiharmonic corrections for entropy and correction for solution phase standard state of 1 mole/litre,  $qh-G_{\text{SPC}}$ ). The  $E_{\text{SPC}}$  is at  $\text{SMD}_{\text{HFIP}}/\text{B3LYP-D3BJ}/6-311+G^{**}$  level of theory. The  $E$  and energy corrections were calculated at  $\text{SMD}_{\text{HFIP}}/\text{B3LYP-D3BJ}/6-311+G^{**}$  level of theory.

| Stationary points energies for racemization of <b>1</b> and <b>3</b> at $T = 333.15$ K in HFIP solvent |                  |              |                  |          |          |                     |
|--------------------------------------------------------------------------------------------------------|------------------|--------------|------------------|----------|----------|---------------------|
| Structure                                                                                              | $E_{\text{SPC}}$ | $E$          | $H_{\text{SPC}}$ | $T.S$    | $T.qh-S$ | $qh-G_{\text{SPC}}$ |
| <b>1a</b>                                                                                              | -862.111319      | -861.895032  | -861.823522      | 0.065621 | 0.063437 | -861.886959         |
| <b>TS1_rot_1a</b>                                                                                      | -862.051357      | -861.835668  | -861.764945      | 0.062461 | 0.061297 | -861.826243         |
| <b>TS2_rot_1a</b>                                                                                      | -862.061342      | -861.847631  | -861.774978      | 0.061807 | 0.060817 | -861.835795         |
| <b>3a</b>                                                                                              | -1207.821306     | -1207.519174 | -1207.410983     | 0.08791  | 0.082372 | -1207.493355        |
| <b>TS1_rot_3a</b>                                                                                      | -1207.755195     | -1207.453459 | -1207.346987     | 0.081848 | 0.078752 | -1207.425739        |
| <b>TS2_rot_3a</b>                                                                                      | -1207.757464     | -1207.455359 | -1207.349274     | 0.081294 | 0.078462 | -1207.427737        |
| <b>3i</b>                                                                                              | -1321.214351     | -1320.875424 | -1320.792645     | 0.094973 | 0.087772 | -1320.880417        |
| <b>TS1_rot_3i</b>                                                                                      | -1321.147697     | -1320.809411 | -1320.727992     | 0.08916  | 0.084369 | -1320.812361        |
| <b>TS2_rot_3i</b>                                                                                      | -1321.149557     | -1320.810788 | -1320.730085     | 0.088676 | 0.084156 | -1320.81424         |
| <b>3g</b>                                                                                              | -1297.824614     | -1297.487581 | -1297.444461     | 0.08802  | 0.082263 | -1297.526724        |
| <b>TS1_rot_3g</b>                                                                                      | -1297.759162     | -1297.42262  | -1297.381063     | 0.082653 | 0.078989 | -1297.460052        |
| <b>TS2_rot_3g</b>                                                                                      | -1297.760433     | -1297.423364 | -1297.382349     | 0.082328 | 0.078863 | -1297.461212        |
| <b>3j</b>                                                                                              | -1132.591589     | -1132.315321 | -1132.187386     | 0.085069 | 0.07981  | -1132.267195        |
| <b>TS1_rot_3j</b>                                                                                      | -1132.52513      | -1132.249333 | -1132.123059     | 0.080097 | 0.076808 | -1132.199867        |
| <b>TS1_rot_3j_c1</b>                                                                                   | -1132.524493     | -1132.248506 | -1132.122427     | 0.080334 | 0.076948 | -1132.199375        |
| <b>3m</b>                                                                                              | -1171.925285     | -1171.641312 | -1171.491432     | 0.091153 | 0.08467  | -1171.576102        |
| <b>TS1_rot_3m</b>                                                                                      | -1171.858653     | -1171.575134 | -1171.426897     | 0.085487 | 0.081287 | -1171.508184        |
| <b>3o</b>                                                                                              | -1767.571939     | -1767.069226 | -1767.179269     | 0.102565 | 0.094347 | -1767.273615        |
| <b>TS1_rot_3o</b>                                                                                      | -1767.506258     | -1767.004003 | -1767.115874     | 0.097525 | 0.091245 | -1767.207119        |
| <b>1b</b>                                                                                              | -747.747639      | -747.558555  | -747.480507      | 0.062144 | 0.060467 | -747.540974         |
| <b>TS1_rot_1b</b>                                                                                      | -747.692281      | -747.503885  | -747.426058      | 0.058269 | 0.057442 | -747.4835           |
| <b>TS2_rot_1b</b>                                                                                      | -747.698088      | -747.510363  | -747.432163      | 0.058441 | 0.057688 | -747.48985          |
| <b>3q</b>                                                                                              | -1093.457219     | -1093.182581 | -1093.067452     | 0.082968 | 0.078702 | -1093.146154        |
| <b>TS1_rot_3q</b>                                                                                      | -1093.388486     | -1093.112952 | -1093.000924     | 0.078044 | 0.075404 | -1093.076328        |
| <b>TS2_rot_3q</b>                                                                                      | -1093.390844     | -1093.115799 | -1093.003413     | 0.078005 | 0.075506 | -1093.078919        |
| <b>N-Ac-(L)-Phe-OH</b>                                                                                 | -707.744395      | -707.540606  | -707.498126      | 0.06545  | 0.061915 | -707.560042         |
| <b>A</b>                                                                                               | -1541.888137     | -1541.888312 | -1541.415572     | 0.106341 | 0.099024 | -1541.514596        |
| <b>(R)-B</b>                                                                                           | -1696.227953     | -1696.218138 | -1695.71334      | 0.109405 | 0.102307 | -1695.815647        |
| <b>(R)-TS</b>                                                                                          | -1696.207731     | -1696.199314 | -1695.699137     | 0.108684 | 0.101419 | -1695.800557        |
| <b>(R)-C</b>                                                                                           | -1696.235515     | -1696.226593 | -1695.720541     | 0.109323 | 0.102078 | -1695.82262         |
| <b>(S)-B</b>                                                                                           | -1696.222135     | -1696.211946 | -1695.707925     | 0.111214 | 0.103173 | -1695.811098        |
| <b>(S)-TS</b>                                                                                          | -1696.206417     | -1696.19817  | -1695.697775     | 0.107618 | 0.10079  | -1695.798565        |
| <b>(S)-C</b>                                                                                           | -1696.232164     | -1696.223927 | -1695.717327     | 0.108891 | 0.101771 | -1695.819099        |

## Cartesian Coordinates of Stationary points

The Cartesian coordinates of stationary points are given in xyz format, where first line is number of atoms in molecule, second line contain information about molecule, and from third line it is Cartesian coordinate. The information provided in the xyz files are the name of molecule, charge-multiplicity (C,M), electronic energy at the method used for geometry optimization (E), zero-point energy correction (ZPE-Corr), correction for energy at 298.15 K (E-Corr-298), correction for enthalpy at 298.15 K (E-Corr-298), correction for free energy at 298.15 K (G-Corr-298), and number of imaginary frequency (NImag). All energies are in hartree. If NImag=1, then its value in  $\text{cm}^{-1}$  is also given.

## Stationary points for enantiomerization of arylated products in HFIP solvent

34

**1a** C,M=0,1 E=-861.8950315 ZPE-Corr=0.268171 E-Corr-298=0.283050 H-Corr-298=0.283994 G-Corr-298=0.225736 NImag=0

```
C -4.0281350314 0.7170177117 -1.6889987783
C -4.1322822676 -0.2710879556 -0.7366867736
C -3.013831624 -0.6322306298 0.0624133596
C -1.7690950292 0.0487327735 -0.1338431145
C -1.6935601602 1.0612524944 -1.1269795498
C -2.7954830205 1.385886878 -1.8863701161
H -4.0525625033 -2.1633317274 1.1845144209
H -4.8890201492 0.9858611915 -2.2941591214
H -5.072488964 -0.793290818 -0.5804694449
C -3.1021857703 -1.6553470906 1.0445717198
C -0.649403879 -0.3200271266 0.6773989253
H -0.752149867 1.5744845697 -1.2922962448
H -2.7212125786 2.1616206181 -2.6430028067
C -0.7746765523 -1.3290199758 1.6129783988
C -2.0065284497 -1.9979903179 1.8019384567
H 0.0843281547 -1.6048376516 2.2169435943
H -2.0781756221 -2.7814911409 2.5501868085
C 0.6637198315 0.346449821 0.5040193997
C 1.7992728855 -0.3108571182 -0.0477327601
C 1.7319952314 -1.6484295745 -0.5241720303
C 3.0421376081 0.3893702735 -0.1450588691
C 1.9604654726 2.3235876505 0.8109435461
C 2.8513701441 -2.2558643168 -1.0503092958
H 0.7916952766 -2.1841827133 -0.4739723848
C 4.1752090924 -0.2629174774 -0.6872223881
C 3.0779139772 1.7340321004 0.3076959636
H 1.904474892 3.3410366987 1.1731276379
C 4.083524582 -1.5649763097 -1.1294962817
H 2.7867247176 -3.2775281425 -1.4124141318
H 5.1119235292 0.2832692645 -0.7492614522
H 3.9982345403 2.3059573374 0.2521328544
H 4.9538719518 -2.0628249667 -1.5458147443
O -0.2597658762 2.2668533468 1.4075618274
N 0.7590694577 1.6351203233 0.911975375
```

34

**TS1\_rot\_1a** C,M=0,1 E=-861.8356679 ZPE-Corr=0.267767 E-Corr-298=0.281758 H-Corr-298=0.282703 G-Corr-298=0.227183

NImag=1 -55.9373

```
C 3.9778132911 2.1328216816 0.2934327003
C 4.2222339908 0.7918875867 0.1259223009
C 3.1655088019 -0.1367908155 -0.0856716749
C 1.7857105723 0.2950349325 -0.0178404735
C 1.6030137587 1.7041766387 0.0316761126
C 2.6476796515 2.5903121851 0.1889695823
H 4.5410363583 -1.7514124554 -0.5020206844
H 4.7932925605 2.8337659952 0.4437142841
H 5.2399434365 0.4111824021 0.1119512301
C 3.4951205072 -1.4626143486 -0.4513602568
C 0.7447571918 -0.719084955 -0.1103864683
H 0.6302265582 2.1181736283 -0.1479822189
H 2.437814838 3.6560867445 0.2039916805
C 1.1536580936 -1.9604774296 -0.610010407
C 2.4925221842 -2.3328936314 -0.8001967607
H 0.4123255951 -2.720503044 -0.8088551908
H 2.7165559555 -3.3273443799 -1.1734337206
C -0.7292099606 -0.6765936116 0.2133426062
C -1.71581922 0.382360843 0.0657548367
C -1.4955638725 1.7460762667 0.3864568849
```

C -3.0610933391 0.0408738163 -0.2975617395  
 C -2.589714277 -2.2204656865 0.2984719056  
 C -2.4515494629 2.7156246063 0.1520812144  
 H -0.612114109 2.0242174435 0.9340513382  
 C -4.010088336 1.0502468363 -0.5862501495  
 C -3.4534857141 -1.319928486 -0.2271624884  
 H -2.8256211745 -3.2495838341 0.5308655826  
 C -3.701632183 2.3806729983 -0.4040882865  
 H -2.2433063845 3.7424942367 0.4372711084  
 H -5.0033690124 0.7450819179 -0.9026517883  
 H -4.4605225227 -1.6226901565 -0.4924578351  
 H -4.4355153447 3.1528771226 -0.6120993866  
 O -0.5818082098 -2.8470575659 1.1371462241  
 N -1.2676662224 -1.895306482 0.578459938

34

**TS2\_rot\_1a** C,M=0,1 E=-861.8476312 ZPE-Corr=0.267872 E-Corr-298=0.281721 H-Corr-298=0.282665 G-Corr-298=0.227721 NImag=1 -36.7080

C -4.8036672452 -0.6098786938 0.1469027386  
 C -4.3653804359 0.6902861773 0.2267516488  
 C -2.9909299866 1.0157035338 0.0669557706  
 C -2.0017997794 -0.0277034955 -0.0573268409  
 C -2.5159366183 -1.3406229221 -0.2365041681  
 C -3.8640386512 -1.6226507899 -0.1322244209  
 H -3.4115768038 3.1377719236 -0.000246298  
 H -5.858151207 -0.8484748006 0.250045546  
 H -5.0689775925 1.5072297552 0.3622059222  
 C -2.6392643572 2.3798541109 -0.0952008169  
 C -0.59138613 0.3702843224 -0.1415427111  
 H -1.8412759068 -2.1472604306 -0.4654787993  
 H -4.2011356118 -2.6446940399 -0.2817991243  
 C -0.3741086866 1.7044984309 -0.513908449  
 C -1.363503913 2.7011447896 -0.4827212659  
 H 0.6087282483 2.0110941794 -0.8355847745  
 H -1.0942349478 3.720035373 -0.7428243825  
 C 0.6420219328 -0.4358781533 0.0378213678  
 C 1.9736443883 0.1645077448 0.0826687744  
 C 2.2366637194 1.4643691908 0.597288185  
 C 3.1134371879 -0.6143914402 -0.2934983795  
 C 1.7413525313 -2.5649689778 -0.1824445083  
 C 3.510866127 1.9971789741 0.5947535216  
 H 1.4363328178 2.0343703976 1.049326641  
 C 4.4015523962 -0.0305073111 -0.339634241  
 C 2.9313997649 -2.0063330234 -0.5092537571  
 H 1.5352210203 -3.6264450673 -0.1556113263  
 C 4.5999069343 1.2683646595 0.0753376338  
 H 3.6726180971 2.9842474861 1.01729664  
 H 5.2346505657 -0.6460048122 -0.666613831  
 H 3.7560553271 -2.6335661532 -0.8294208803  
 H 5.5920365079 1.7085819898 0.0541224792  
 O -0.3350740703 -2.4568866209 0.7302558382  
 N 0.6496053778 -1.798766307 0.2087362678

48

**3a** C,M=0,1 E=-1207.5191742 ZPE-Corr=0.381501 E-Corr-298=0.403911 H-Corr-298=0.404855 G-Corr-298=0.328222 NImag=0

C 3.907013992 0.6973583087 1.805711265  
 C 4.0299841111 -0.3526641516 0.9238011066  
 C 2.9534696195 -0.7157276701 0.0718535531  
 C 1.7301179906 0.0252089545 0.1356646668  
 C 1.6337941114 1.1010168447 1.0594970387  
 C 2.6958437709 1.427732904 1.8732773242  
 H 3.9815422537 -2.3653843991 -0.8798641738  
 H 4.7359332839 0.9680621073 2.4531147822  
 H 4.9534688226 -0.9225967288 0.8654866345  
 C 3.0530578832 -1.8024596004 -0.8370057581  
 C 0.6496064451 -0.3448460992 -0.7241268436  
 H 0.709558346 1.6654547669 1.124937706  
 H 2.6059476663 2.2538883449 2.5726732104  
 C 0.7844852527 -1.3969324776 -1.624053573  
 C 2.003013157 -2.1309537742 -1.6577774648  
 H 2.0961254503 -2.9495178573 -2.3648826848  
 C -0.6607239865 0.3387513844 -0.577996155  
 C -1.7621193891 -0.2559813524 0.0969344408  
 C -1.6671546199 -1.5459051817 0.6830566727  
 C -3.002063043 0.4487600409 0.1769801872  
 C -1.9785025485 2.2690157293 -1.034483351  
 C -2.7603969545 -2.1047005552 1.3084092091



|   |               |               |               |
|---|---------------|---------------|---------------|
| H | -0.7277532443 | -2.0835027958 | 0.6338717742  |
| C | -4.106871058  | -0.1505334841 | 0.8275979941  |
| C | -3.0656650719 | 1.7393541287  | -0.411361672  |
| H | -1.9468198407 | 3.2392785797  | -1.5110466234 |
| C | -3.9894747794 | -1.4073823477 | 1.3811888223  |
| H | -2.6785763009 | -3.0921403217 | 1.7525466603  |
| H | -5.0434632721 | 0.3969237794  | 0.8793365259  |
| H | -3.985218989  | 2.3138539428  | -0.3719101486 |
| H | -4.8389952763 | -1.8662344671 | 1.8776579111  |
| O | 0.1988613807  | 2.1150685814  | -1.773649769  |
| N | -0.7844534739 | 1.5686316594  | -1.1208715233 |
| C | -0.3191035815 | -1.7607678431 | -2.5441870258 |
| C | -0.7812971192 | -3.0852083342 | -2.6280880313 |
| C | -0.9380627096 | -0.7890898447 | -3.3416692666 |
| C | -1.8405211502 | -3.419850215  | -3.4614809576 |
| H | -0.3197959798 | -3.8537204844 | -2.0147623839 |
| C | -2.0020405282 | -1.11065478   | -4.1847298913 |
| H | -0.5665752001 | 0.231382284   | -3.3217936435 |
| C | -2.461243024  | -2.431771128  | -4.239704598  |
| H | -2.2111705017 | -4.4386931871 | -3.5184827977 |
| H | -2.4542828101 | -0.3352799462 | -4.7909770896 |
| O | -3.4995844134 | -2.8569170781 | -5.0212100575 |
| C | -4.1842238969 | -1.8865008061 | -5.8123716299 |
| H | -4.9735613447 | -2.4303657994 | -6.3339727035 |
| H | -4.6322084681 | -1.1061070777 | -5.1862499948 |
| H | -3.5144896313 | -1.4251466828 | -6.5474328231 |

48

**TS1\_rot\_3a** C,M=0,1 E=-1207.4534588 ZPE-Corr=0.380696 E-Corr-298=0.401888 H-Corr-298=0.402833 G-Corr-298=0.331536  
NImag=1 -29.3624

|   |               |               |               |
|---|---------------|---------------|---------------|
| C | 4.8371310897  | -3.5081898664 | -0.5888156921 |
| C | 3.6749083102  | -3.9020902155 | 0.0351330741  |
| C | 2.5993745907  | -2.9951000338 | 0.2250572213  |
| C | 2.7595410035  | -1.6042583309 | -0.1047828941 |
| C | 3.9116828118  | -1.2821294998 | -0.8692876715 |
| C | 4.9206177937  | -2.1969037807 | -1.1007094167 |
| H | 1.2091168474  | -4.5339615604 | 0.8563743578  |
| H | 5.6474575553  | -4.2133372752 | -0.7476507329 |
| H | 3.5334051086  | -4.9343150116 | 0.3442465387  |
| C | 1.322592155   | -3.4835738691 | 0.6041096965  |
| C | 1.6712477996  | -0.6855595453 | 0.2137282004  |
| H | 3.9686362353  | -0.3244971321 | -1.3615546557 |
| H | 5.7710006624  | -1.9062928126 | -1.7110306124 |
| C | 0.3794416302  | -1.2700795136 | 0.252275151   |
| C | 0.2331897974  | -2.6602539231 | 0.4916079549  |
| H | -0.7691472538 | -3.0655332022 | 0.5844839212  |
| C | 1.7617182647  | 0.7614087443  | 0.5341693973  |
| C | 2.7109102516  | 1.7813392223  | 0.1034341725  |
| C | 4.0971310164  | 1.5608837727  | -0.0886660802 |
| C | 2.2665539444  | 3.1386936467  | -0.0086210257 |
| C | 0.3647973837  | 2.5677927518  | 1.3163824177  |
| C | 4.9328681604  | 2.5596041075  | -0.5538495048 |
| H | 4.5324373186  | 0.6209532941  | 0.2084642056  |
| C | 3.120143813   | 4.1329700256  | -0.5402696909 |
| C | 1.0093448001  | 3.4846403953  | 0.5564534389  |
| H | -0.5176198619 | 2.7583526874  | 1.9110401255  |
| C | 4.4338745562  | 3.8438386927  | -0.8442621484 |
| H | 5.9927255334  | 2.3519242415  | -0.6676271805 |
| H | 2.7307968756  | 5.1411831932  | -0.6490318755 |
| H | 0.6215634265  | 4.4942163267  | 0.4763578118  |
| H | 5.0921639693  | 4.612730995   | -1.2366190372 |
| O | 0.1436960637  | 0.5100273937  | 2.2360921814  |
| N | 0.7916776026  | 1.247337507   | 1.3944608714  |
| C | -0.8494555641 | -0.4935991976 | -0.0097470593 |
| C | -2.0391302887 | -0.7158222309 | 0.6992778214  |
| C | -0.8678800761 | 0.4715030365  | -1.0359761865 |
| C | -3.2047200767 | -0.0057084287 | 0.4159404089  |
| H | -2.0502094341 | -1.4334898485 | 1.513102114   |
| C | -2.0194366575 | 1.1868076182  | -1.3303959725 |
| H | 0.0305042983  | 0.6466039047  | -1.6192155605 |
| C | -3.1953825035 | 0.9557187442  | -0.601937324  |
| H | -4.0995051869 | -0.1980694105 | 0.9951762519  |
| H | -2.0342284231 | 1.9223148609  | -2.1286781997 |
| C | -5.4971119121 | 1.5219310584  | -0.249027591  |
| H | -5.3769322203 | 1.7507193171  | 0.8162011359  |
| H | -6.2108049911 | 2.2192158475  | -0.690942287  |

H -5.8713988161 0.4980241743 -0.3635676446  
O -4.2753301933 1.7115265089 -0.9619055368  
48

**TS2\_rot\_3a** C,M=0,1 E=-1207.4553593 ZPE-Corr=0.380777 E-Corr-298=0.401873 H-Corr-298=0.402817 G-Corr-298=0.332014  
NImag=1 -23.6578

C -5.3348833832 -0.8437956425 1.1334303174  
C -4.6815931687 -1.861672734 0.4775774206  
C -3.3401178803 -1.7022107956 0.0388626863  
C -2.6748343342 -0.4472196866 0.1895248924  
C -3.3636282845 0.5577898731 0.9198728581  
C -4.645560082 0.3620032194 1.3896686098  
H -3.1193815514 -3.7566943117 -0.6311882646  
H -6.3538948734 -0.9759120413 1.4848422688  
H -5.1637933093 -2.8225227812 0.3189817718  
C -2.6127969743 -2.8100817905 -0.4664624652  
C -1.3080825258 -0.2700231447 -0.3036313903  
H -2.8551381522 1.4804732125 1.1715240464  
H -5.1258692593 1.1448940238 1.9697857789  
C -0.5614221219 -1.4712994196 -0.4193155093  
C -1.254414936 -2.7037588712 -0.5940621294  
H -0.6581360777 -3.5894464925 -0.7886931077  
C -0.8381175084 1.1068179804 -0.5853777067  
C 0.5152072456 1.6478884577 -0.6663666468  
C 1.6288785377 0.9346710547 -1.1680102461  
C 0.7353702937 3.0271882283 -0.3524315886  
C -1.6117537724 3.3967371459 -0.5806304655  
C 2.89849045 1.4818971375 -1.1735366144  
H 1.4848704489 -0.0344213577 -1.610824532  
C 2.0475712728 3.5531851105 -0.3071605769  
C -0.3956240781 3.8804144236 -0.2330045208  
H -2.513975932 3.9841792845 -0.682175583  
C 3.1275357238 2.7814477685 -0.6829077343  
H 3.7207308897 0.9016583257 -1.5810839394  
H 2.1761400591 4.5940187501 -0.0240882713  
H -0.2794384746 4.9279604231 0.02240348  
H 4.1325549047 3.1916475137 -0.6626783792  
O -2.9796072207 1.7480473511 -1.3317782002  
N -1.8115265054 2.0493257515 -0.8685347095  
C 0.8901636028 -1.6313458309 -0.1750604681  
C 1.7092024954 -2.428113677 -0.9960306126  
C 1.4544907161 -1.0768577811 0.9815531603  
C 3.0515859213 -2.6122525775 -0.69872775  
H 1.297497517 -2.872401279 -1.8971008589  
C 2.796764634 -1.2696344394 1.3044141684  
H 0.8318318019 -0.4802028826 1.6406194824  
C 3.6055910708 -2.0295334081 0.4520907149  
H 3.6934376199 -3.2042381034 -1.3437784951  
H 3.1961637559 -0.8243971318 2.2073461014  
O 4.9348834274 -2.2676549752 0.6543276328  
C 5.5592172636 -1.6715096653 1.7910709346  
H 5.1166429929 -2.0348909835 2.7256960739  
H 6.6073704364 -1.9716126409 1.7464461995  
H 5.4907023243 -0.5780725908 1.7543231676  
50

**3i** C,M=0,1 E=-1320.875424 ZPE-Corr=0.390367 E-Corr-298=0.414915 H-Corr-298=0.415860 G-Corr-298=0.333263 NImag=0

C 5.5395173257 -0.4381090808 0.1994758389  
C 4.8330502316 -1.5691119996 0.5412480989  
C 3.4179884316 -1.6040303191 0.4254263796  
C 2.7276513003 -0.4459104251 -0.0563250511  
C 3.48528203 0.7073959148 -0.3959383761  
C 4.8567331845 0.7098891045 -0.2710124463  
H 3.1940071353 -3.6295611566 1.1540067023  
H 6.621551579 -0.420782504 0.2910540702  
H 5.3464757356 -2.4543628786 0.9069010976  
C 2.6666358303 -2.7540914426 0.7850910038  
C 1.3040971371 -0.4866398766 -0.1727867196  
H 2.9727307555 1.594749169 -0.7524040567  
H 5.4217543228 1.5986349709 -0.5366652832  
C 0.5971864998 -1.6342892481 0.167891694  
C 1.2992484453 -2.7677670535 0.6617516268  
H 0.7335733319 -3.65675039 0.9231487523  
C 0.566874964 0.7416444653 -0.5662736622  
C -0.1200125782 1.556279605 0.3749738992  
C -0.1197749621 1.2528008088 1.7621554685  
C -0.8452444689 2.6989528955 -0.0818125773

C -0.1361450707 2.1779658756 -2.3301993781  
 C -0.8182777481 2.0475831272 2.644660594  
 H 0.4350480335 0.3926256906 2.1176660223  
 C -1.5519292275 3.4971154197 0.8490910751  
 C -0.8221158555 2.9812637455 -1.4728920268  
 H -0.0747386829 2.3199622638 -3.4005162266  
 C -1.5416430173 3.1752138253 2.1892516195  
 H -0.8134928036 1.8071318228 3.7035004199  
 H -2.1007021682 4.3613941561 0.4866670588  
 H -1.3564539256 3.8399770022 -1.8655496183  
 H -2.0868464568 3.7871198883 2.9012850855  
 O 1.1417370778 0.3086990075 -2.7583058967  
 N 0.5503007932 1.0611430747 -1.8778825441  
 C -0.8790879398 -1.6826400086 0.0270102291  
 C -1.6879712049 -2.0420870698 1.1139072862  
 C -1.4875916496 -1.3433104826 -1.1926820437  
 C -3.0774448693 -2.0332257703 0.9992447595  
 H -1.2288507647 -2.3022771372 2.0626674921  
 C -2.8736577671 -1.336949409 -1.3197901279  
 H -0.8664822584 -1.101346079 -2.0498389994  
 C -3.6515429933 -1.6739137749 -0.2148232852  
 H -3.7153552743 -2.291780055 1.8380281513  
 H -3.3472265235 -1.0805724511 -2.2611316395  
 O -5.0483259856 -1.7306014893 -0.3119437016  
 C -5.7329318186 -0.5750889645 -0.5726897181  
 O -5.1892231219 0.5012099242 -0.7034092156  
 C -7.2031987081 -0.8474784853 -0.6614983053  
 H -7.395662183 -1.5551601217 -1.4741853701  
 H -7.5508109245 -1.3091981842 0.2677841787  
 H -7.7394838628 0.08391128 -0.8423479545

50

TS1\_rot\_3i C,M=0,1 E=-1320.8094105 ZPE-Corr=0.389677 E-Corr-298=0.413010 H-Corr-298=0.413954 G-Corr-298=0.336469

NImag=1 -23.0583

C 5.1652419071 -2.7009279239 -0.6621809326  
 C 4.1211410909 -3.3903457794 -0.0891867744  
 C 2.8596302809 -2.7724429584 0.120006262  
 C 2.6925468717 -1.3659171674 -0.1330929494  
 C 3.7467016752 -0.7404978254 -0.8500640296  
 C 4.9444149061 -1.3795266996 -1.103254901  
 H 1.8649734548 -4.6275442045 0.6366247622  
 H 6.1205727541 -3.1865211318 -0.8370839469  
 H 4.2224420568 -4.4425468716 0.1627943735  
 C 1.7310670841 -3.5672677536 0.4428395289  
 C 1.4161161511 -0.7462875372 0.2053441162  
 H 3.5837230532 0.2299328138 -1.2903187514  
 H 5.7099610757 -0.8644059691 -1.6764817657  
 C 0.3002396642 -1.6195870742 0.1946606388  
 C 0.4793064815 -3.0159458958 0.3535019422  
 H -0.4017060254 -3.6471900583 0.4054226802  
 C 1.1560524757 0.6658732653 0.5874225568  
 C 1.8396461885 1.8998592431 0.2199758888  
 C 3.241553086 2.0249795911 0.0587320664  
 C 1.0841796581 3.1148399522 0.1465247347  
 C -0.6459143311 2.0500487787 1.4007869784  
 C 3.821110241 3.2135890065 -0.3453982972  
 H 3.8840045337 1.2049817982 0.3351503293  
 C 1.683564343 4.3061479058 -0.3243260239  
 C -0.2283804105 3.1252809725 0.6910679199  
 H -1.5566160732 1.9991032495 1.9811074681  
 C 3.0335380591 4.3523144319 -0.6021643487  
 H 4.9017214838 3.2709110639 -0.4364574159  
 H 1.0660358142 5.1959694354 -0.4058709847  
 H -0.8459879917 4.0151242947 0.6384828648  
 H 3.4951985325 5.2723231753 -0.9469554897  
 O -0.3789232438 -0.0378920208 2.2375244043  
 N 0.0843037691 0.8680601701 1.4397166519  
 C -1.0803970409 -1.1430731121 -0.0472083794  
 C -2.1764811212 -1.6591688678 0.6657326974  
 C -1.3227788134 -0.190819969 -1.0511748426  
 C -3.4740587681 -1.2389666776 0.3922385754  
 H -2.0074942493 -2.3734295961 1.464139364  
 C -2.6181695065 0.2358527137 -1.3368356245  
 H -0.4917114305 0.2040708954 -1.6260167032  
 C -3.6783887643 -0.2925408619 -0.6097427123  
 H -4.315622968 -1.6271153619 0.9550173236

H -2.8122542416 0.9630983436 -2.1182116007  
O -4.9578929965 0.2119870768 -0.8766528575  
C -5.9328144856 -0.6490059656 -1.3003074225  
O -5.7382920549 -1.8323271847 -1.4821453478  
C -7.2242726883 0.0827358728 -1.5014995459  
H -7.5307365541 0.5524321458 -0.5615198877  
H -7.0856055668 0.8796002349 -2.2388993555  
H -7.9919375764 -0.6123344132 -1.8410918371

50

**TS2\_rot\_3i** C,M=0,1 E=-1320.8107876 ZPE-Corr=0.389494 E-Corr-298=0.412773 H-Corr-298=0.413717 G-Corr-298=0.336670

NImag=1 -31.0472

C -5.3979281466 -1.8942379142 1.3353870545  
C -4.6924844639 -2.6447660496 0.42400985  
C -3.4538761618 -2.1823387027 -0.0964782461  
C -2.9661264455 -0.8837946541 0.2450477185  
C -3.6945047899 -0.1663790152 1.2317846599  
C -4.8632695888 -0.6612495527 1.7709686099  
H -3.0187931764 -4.0111035847 -1.1839467323  
H -6.334072315 -2.259499857 1.7470621149  
H -5.0451644927 -3.6255888989 0.1168746157  
C -2.6410142111 -3.0392333505 -0.8800643805  
C -1.7138767836 -0.3894954556 -0.328408334  
H -3.2966590535 0.7617368114 1.6233485446  
H -5.3733863094 -0.0964510583 2.5460978228  
C -0.8218231534 -1.4043442786 -0.7609656466  
C -1.3390216675 -2.684028486 -1.110247356  
H -0.6483740766 -3.4072068712 -1.5316888901  
C -1.4845535254 1.0740647923 -0.3591301856  
C -0.2426767672 1.8327574811 -0.4632506435  
C 0.8795356599 1.4220352035 -1.2195470462  
C -0.1737063871 3.1411265167 0.1136786999  
C -2.5589721109 3.1611384786 0.2143892977  
C 2.0498013899 2.1574017524 -1.2395585659  
H 0.8094031503 0.5500334912 -1.8446311872  
C 1.0479644279 3.8536612317 0.1334309395  
C -1.3849117499 3.7586191195 0.5289870408  
H -3.5388526202 3.6026244374 0.3344003438  
C 2.1627637625 3.3551362953 -0.5081930465  
H 2.8809781582 1.8097093586 -1.8455026821  
H 1.070113876 4.8256538353 0.617867932  
H -1.3806418888 4.7406880822 0.9891128615  
H 3.0956547292 3.91048301 -0.5050943738  
O -3.7743188712 1.4892578595 -0.7239343001  
N -2.6083058988 1.8815562027 -0.3316278042  
C 0.6595325896 -1.3628273875 -0.6940375732  
C 1.4690568182 -1.8360885775 -1.7400618477  
C 1.2713951202 -0.955523984 0.5018320836  
C 2.8554461344 -1.855268862 -1.6179356151  
H 1.0122527623 -2.1526842032 -2.6723372541  
C 2.6558995116 -0.99060897 0.6428262814  
H 0.6548376894 -0.6085672523 1.3241687989  
C 3.432596701 -1.4293453113 -0.4232384724  
H 3.4826108144 -2.1916712819 -2.4359727723  
H 3.1369134736 -0.6766658497 1.5632277655  
O 4.8238062152 -1.3684085804 -0.2776278644  
C 5.5445894018 -2.5296342838 -0.3522886085  
O 5.0316260668 -3.6163772337 -0.5149632502  
C 7.0078476446 -2.2468058615 -0.2042750023  
H 7.3385538152 -1.5997401029 -1.0231400535  
H 7.1900395815 -1.7125799738 0.7330734733  
H 7.5664762915 -3.1824761901 -0.2198264642

46

**3g** C,M=0,1 E=-1297.4875808 ZPE-Corr=0.351466 E-Corr-298=0.373784 H-Corr-298=0.374728 G-Corr-298=0.297956 NImag=0

C 5.5205732496 -0.5398923139 0.000154975  
C 4.797285492 -1.6510825842 0.3702790482  
C 3.3778566732 -1.639056748 0.3300175069  
C 2.7015291362 -0.4536337416 -0.1030964359  
C 3.4766731976 0.6782852903 -0.4734406312  
C 4.8519932166 0.6344116959 -0.4235945059  
H 3.1280664818 -3.6642001576 1.0515099966  
H 6.6058822981 -0.5584027875 0.0335892828  
H 5.3002223834 -2.5557843805 0.7007476533  
C 2.6105328209 -2.7687093827 0.7190450815  
C 1.2735612988 -0.44746043 -0.1472672495  
H 2.9754559227 1.585445708 -0.7942522646

|   |               |               |               |
|---|---------------|---------------|---------------|
| H | 5.4310097714  | 1.5066172744  | -0.7124703569 |
| C | 0.5520318337  | -1.5770470148 | 0.2216394768  |
| C | 1.2390917667  | -2.7379296964 | 0.6707706823  |
| H | 0.6596461723  | -3.6109979296 | 0.9538219066  |
| C | 0.5590696932  | 0.8100991663  | -0.486029251  |
| C | -0.0436213139 | 1.6369644584  | 0.5007701902  |
| C | 0.016798279   | 1.3144631081  | 1.8825209781  |
| C | -0.7429192246 | 2.8153124013  | 0.096166428   |
| C | -0.1743529802 | 2.2979215942  | -2.1933997113 |
| C | -0.6012831395 | 2.1250980467  | 2.809553265   |
| H | 0.554256358   | 0.4285570264  | 2.1996076924  |
| C | -1.3664300054 | 3.6285260221  | 1.0722669535  |
| C | -0.7797691291 | 3.1164272044  | -1.2906772155 |
| H | -0.162780108  | 2.4530919893  | -3.26360487   |
| C | -1.2998972957 | 3.2876228273  | 2.4061192091  |
| H | -0.5509238772 | 1.8704377946  | 3.8638110822  |
| H | -1.8963086044 | 4.5198406408  | 0.7494291608  |
| H | -1.2965331986 | 4.0025076272  | -1.6440660317 |
| H | -1.7810194021 | 3.9115034857  | 3.1530319185  |
| O | 1.0011968726  | 0.3833243266  | -2.7089931895 |
| N | 0.4874303091  | 1.1475400366  | -1.7913862183 |
| C | -0.9280978423 | -1.5848752029 | 0.1532607228  |
| C | -1.6890323382 | -1.962097889  | 1.2718801047  |
| C | -1.5844154484 | -1.2060518104 | -1.0314342207 |
| C | -3.0771659591 | -1.9402006718 | 1.225064486   |
| H | -1.1876690503 | -2.2506366907 | 2.1896564519  |
| C | -2.9708598869 | -1.1786136841 | -1.094097438  |
| H | -0.9993135691 | -0.9555355326 | -1.9103700674 |
| C | -3.6976948281 | -1.5417938868 | 0.0406791715  |
| H | -3.6733015839 | -2.2138608793 | 2.0863158448  |
| H | -3.4858775738 | -0.8898120159 | -2.0014853804 |
| N | -5.1519997796 | -1.5072707778 | -0.0139482693 |
| O | -5.6921286112 | -1.1443298582 | -1.062932743  |
| O | -5.7860567671 | -1.8412225785 | 0.9913371205  |

46

**TS1\_rot\_3g** C,M=0,1 E=-1297.4226202 ZPE-Corr=0.350660 E-Corr-298=0.371822 H-Corr-298=0.372766 G-Corr-298=0.300710

NImag=1 -20.9330

|   |               |               |               |
|---|---------------|---------------|---------------|
| C | 4.7529653828  | -2.6163314589 | -0.5677024096 |
| C | 3.7039563899  | -3.3270932146 | -0.0322271094 |
| C | 2.4262300479  | -2.7311802468 | 0.1416949271  |
| C | 2.2452008604  | -1.3249912031 | -0.1062382443 |
| C | 3.3110460894  | -0.6757319512 | -0.7842453234 |
| C | 4.5249256877  | -1.2945511133 | -1.0055763255 |
| H | 1.4502384445  | -4.6062450581 | 0.6158316834  |
| H | 5.7211419725  | -3.0847938889 | -0.7162621477 |
| H | 3.8142829164  | -4.3792317684 | 0.2156900991  |
| C | 1.3035754332  | -3.5470323311 | 0.426530582   |
| C | 0.9507181651  | -0.7285019754 | 0.1970391801  |
| H | 3.1465154669  | 0.2961534721  | -1.2205025356 |
| H | 5.2998277774  | -0.7633528782 | -1.550711665  |
| C | -0.1481631332 | -1.6219038105 | 0.1564944255  |
| C | 0.0447711623  | -3.0159564162 | 0.3106826109  |
| H | -0.8264735877 | -3.6620152424 | 0.3354182605  |
| C | 0.6519989207  | 0.6784889741  | 0.5694483808  |
| C | 1.3309584763  | 1.9221720504  | 0.2284554333  |
| C | 2.7361782579  | 2.0704669786  | 0.1279142288  |
| C | 0.5587652332  | 3.1239850836  | 0.1204959951  |
| C | -1.2055189498 | 2.0332803958  | 1.3043371268  |
| C | 3.3117400756  | 3.2692121407  | -0.2510921052 |
| H | 3.3801587407  | 1.2606888956  | 0.4301194257  |
| C | 1.1570415706  | 4.3254895242  | -0.3252275174 |
| C | -0.7749563105 | 3.1136099641  | 0.6094201532  |
| H | -2.1372940641 | 1.9708797967  | 1.848845369   |
| C | 2.5168450077  | 4.3944065449  | -0.5430745632 |
| H | 4.3941022544  | 3.3454969233  | -0.2945385411 |
| H | 0.5280864898  | 5.2041938956  | -0.4347543282 |
| H | -1.4037122316 | 3.9936120264  | 0.529934977   |
| H | 2.9776774519  | 5.322013512   | -0.8678147627 |
| O | -0.9400418185 | -0.0492752884 | 2.1548021425  |
| N | -0.4601557292 | 0.8630638883  | 1.3734620184  |
| C | -1.5281100227 | -1.1660781473 | -0.1207288925 |
| C | -2.6339621199 | -1.7036637832 | 0.5638756221  |
| C | -1.7533875119 | -0.2180767556 | -1.13635502   |
| C | -3.9260925387 | -1.3085372502 | 0.251756792   |
| H | -2.4736839017 | -2.4150800404 | 1.3654442543  |

C -3.0398583823 0.1939133674 -1.4572970092  
H -0.9115875237 0.1855365382 -1.6876969861  
C -4.111292288 -0.3590693182 -0.7557801727  
H -4.7793532504 -1.7113719754 0.7823474726  
H -3.2171930476 0.918247909 -2.2419082938  
N -5.4616519669 0.064186259 -1.0854171418  
O -6.4050913906 -0.4432502293 -0.4702497322  
O -5.6135028761 0.9160484952 -1.9672253636

46

**TS2\_rot\_3g** C,M=0,1 E=-1297.4233642 ZPE-Corr=0.350710 E-Corr-298=0.371810 H-Corr-298=0.372754 G-Corr-298=0.300986

NImag=1 -21.1903

C -5.1593030113 -1.559738081 1.0787810416  
C -4.4091559463 -2.4055911508 0.2966580297  
C -3.1031561964 -2.0384405961 -0.127141259  
C -2.5834611937 -0.7421327476 0.175463695  
C -3.3679977682 0.0790121653 1.0300328594  
C -4.6072763501 -0.3220789178 1.4800293402  
H -2.667987508 -3.9531589486 -1.0535249991  
H -6.1488692621 -1.8511350145 1.4178302543  
H -4.7813415321 -3.3885265951 0.0211200675  
C -2.2693958666 -2.9818161723 -0.7762508793  
C -1.2583224093 -0.3462538651 -0.2978817096  
H -2.9643108393 1.0168067106 1.3912657196  
H -5.161947087 0.3209887019 2.1572606666  
C -0.389114554 -1.4260157989 -0.5947305081  
C -0.9364737124 -2.701470996 -0.9136850371  
H -0.2502872329 -3.4798138249 -1.230430134  
C -0.9558963752 1.1030576828 -0.3920294463  
C 0.3196828071 1.8083544611 -0.3577811382  
C 1.5227815519 1.3127970261 -0.9117879774  
C 0.3603120028 3.1491752225 0.1445286762  
C -2.0127014541 3.2577328136 -0.1066351582  
C 2.7140609848 2.0051349986 -0.7988447006  
H 1.5078725762 0.412491503 -1.49956332  
C 1.5952536567 3.8190383565 0.3062383814  
C -0.8695503324 3.8344507435 0.3355559376  
H -2.9792549483 3.7399214047 -0.1571134886  
C 2.7701436279 3.2420492421 -0.1290205381  
H 3.6090332591 1.5932620399 -1.2551609121  
H 1.5870154669 4.8193765438 0.7293574998  
H -0.8876905979 4.8458482109 0.7265920005  
H 3.7156127009 3.7638949923 -0.0185817825  
O -3.1601328613 1.5578477877 -1.0771805619  
N -2.0407788644 1.9443950107 -0.565638967  
C 1.0779333288 -1.4649089404 -0.3934808634  
C 1.9445898957 -2.0336098137 -1.3441292207  
C 1.5993714871 -1.0484058115 0.8450474047  
C 3.3052894173 -2.1347407422 -1.0914684951  
H 1.5526032624 -2.3619969724 -2.3005612186  
C 2.9545812819 -1.1573277583 1.1188851385  
H 0.9312042041 -0.6334244623 1.5910845646  
C 3.7928546839 -1.6899137953 0.1389029657  
H 3.9831806183 -2.5463049203 -1.8284002635  
H 3.3632841455 -0.8341621985 2.0678049242  
N 5.2182104391 -1.7874723666 0.4084746427  
O 5.9519354307 -2.2557174831 -0.4675477201  
O 5.637689324 -1.3955994446 1.5017754088

47

**3j** C,M=0,1 E=-1132.3153214 ZPE-Corr=0.376384 E-Corr-298=0.397974 H-Corr-298=0.398918 G-Corr-298=0.324655 NImag=0

C 3.9275444121 0.7130375393 1.7324836644  
C 4.046077844 -0.3575159537 0.8751437019  
C 2.9656682618 -0.7392561602 0.0361555518  
C 1.7436479588 0.0048861516 0.0883585923  
C 1.6516674844 1.1018760401 0.9870241722  
C 2.7175646041 1.4466495784 1.787998199  
H 3.9875988984 -2.4119457617 -0.8816871455  
H 4.7593364322 0.9979255591 2.3700155802  
H 4.9687926818 -0.9295427033 0.8267549767  
C 3.0601870178 -1.8466700839 -0.8478060799  
C 0.6598919058 -0.3821503746 -0.7589123524  
H 0.7278444039 1.6682018728 1.0426447274  
H 2.6319171389 2.2892714854 2.4679574078  
C 0.7892188157 -1.4574470479 -1.6319454147  
C 2.0051703395 -2.1945830227 -1.6545686671  
H 2.0926083124 -3.0312698741 -2.3407312847

C -0.6475573848 0.3127754661 -0.6359321511  
 C -1.7575971946 -0.2586545304 0.0444960418  
 C -1.668075665 -1.5236648663 0.6832461486  
 C -3.0015325188 0.4429466539 0.0741067229  
 C -1.96333104 2.2185492669 -1.1901870067  
 C -2.7699368967 -2.0614472207 1.311988794  
 H -0.7259574599 -2.0586976023 0.672742191  
 C -4.115450364 -0.1346997692 0.7287240006  
 C -3.0605399744 1.7073383534 -0.5689709318  
 H -1.9261866744 3.1696026517 -1.7036278133  
 C -4.0028407348 -1.3675083151 1.3348878655  
 H -2.6920680629 -3.0296714288 1.7972801559  
 H -5.0547516494 0.4102961699 0.7417477982  
 H -3.9837783121 2.277116973 -0.5723003419  
 H -4.8591274105 -1.8098214078 1.834729769  
 O 0.2288918594 2.0487988934 -1.8772760854  
 N -0.7641843684 1.5227616379 -1.2230801041  
 C -0.3262116536 -1.842547556 -2.5319278925  
 C -0.7979745295 -3.1637586647 -2.5625342355  
 C -0.9433946599 -0.8784411044 -3.3397874169  
 C -1.8841065461 -3.4944504326 -3.3705015038  
 H -0.3312564959 -3.9167637502 -1.9342701594  
 C -2.0421045748 -1.19615909 -4.1466098832  
 H -0.5500797133 0.1346840991 -3.3484696254  
 C -2.5073322487 -2.5168605108 -4.1503399174  
 H -2.2568159445 -4.5149342938 -3.3838223126  
 H -3.3613255378 -2.7815406607 -4.7684717043  
 C -2.6968602455 -0.1257157755 -4.9829675542  
 H -3.5922254163 -0.5017588667 -5.4857641477  
 H -2.9865220206 0.7311409245 -4.3636523035  
 H -2.0115419037 0.2519742612 -5.7513217163

47

**TS1\_rot\_3j** C<sub>M</sub>=0,1 E=-1132.249333 ZPE-Corr=0.375460 E-Corr-298=0.395932 H-Corr-298=0.396876 G-Corr-298=0.326978  
 NImag=1 -27.5824

C 4.9621328638 -3.4603630689 -0.3505696267  
 C 3.7748518993 -3.886008552 0.1998520825  
 C 2.6571409323 -3.0155677463 0.3000252341  
 C 2.7900217622 -1.6245964227 -0.0434664576  
 C 3.9807886842 -1.2737969422 -0.7332663567  
 C 5.034105779 -2.1547416235 -0.8792841023  
 H 1.2844191155 -4.5942485454 0.8660801868  
 H 5.8056935797 -4.1379693468 -0.441621068  
 H 3.6486869236 -4.9175262728 0.5176677768  
 C 1.3775952403 -3.5442757117 0.6041211426  
 C 1.6529293175 -0.7400267062 0.1845854707  
 H 4.0378707935 -0.3240878867 -1.2395222717  
 H 5.9130657472 -1.8430625697 -1.4363785316  
 C 0.3829010808 -1.3699428601 0.165455772  
 C 0.2694866491 -2.760435837 0.4143046668  
 H -0.7222652167 -3.1985248186 0.4556716431  
 C 1.670921686 0.7214521596 0.459592441  
 C 2.5927689189 1.7676187061 0.0333269381  
 C 3.9973741969 1.6122586976 -0.0674061488  
 C 2.0883679299 3.0929056574 -0.170816956  
 C 0.1470610314 2.4859840842 1.079343325  
 C 4.8077742417 2.630928489 -0.53430482  
 H 4.4611285626 0.7130231162 0.3041280413  
 C 2.9205834558 4.1047958988 -0.7029814385  
 C 0.7855293991 3.3982529411 0.3082102645  
 H -0.7748083717 2.6581172857 1.6170850962  
 C 4.2627530144 3.8713677895 -0.9176122667  
 H 5.8817099616 2.4752374387 -0.5758914301  
 H 2.4886928946 5.0850029717 -0.8834867398  
 H 0.3537231014 4.3818697109 0.1593551473  
 H 4.9036767578 4.6547926888 -1.309942249  
 O -0.0288543651 0.4591688779 2.0749336797  
 N 0.6328332989 1.1939395906 1.2421318241  
 C -0.8632417657 -0.6430245701 -0.1717419367  
 C -2.0750838988 -0.9045724888 0.4913233355  
 C -0.8578615571 0.2957116497 -1.2145055652  
 C -3.2352828568 -0.2325540551 0.1196295865  
 H -2.0952946634 -1.6078233944 1.3171067843  
 C -2.0142819386 0.9900909024 -1.5879388504  
 H 0.0681510839 0.4836282354 -1.7506425669  
 C -3.2066344334 0.712897209 -0.9095575895

H -4.1166150227 1.237638465 -1.1889518072  
H -4.1664078802 -0.4352262315 0.6414984696  
C -1.953837867 2.0271574924 -2.6807194841  
H -1.4076076547 2.9163023702 -2.3407919123  
H -1.4292462025 1.6479807593 -3.5645903052  
H -2.9540472181 2.3462815035 -2.987007037

47

**TS1\_rot\_3j\_c1** C,M=0,1 E=-1132.2485061 ZPE-Corr=0.375433 E-Corr-298=0.395926 H-Corr-298=0.396870 G-Corr-298=0.326759  
NImag=1 -30.3961

C 4.8643230275 -3.4965863113 -0.4297156319  
C 3.6908380798 -3.8727769869 0.1829921217  
C 2.6115871513 -2.9609350057 0.3266259067  
C 2.7785783144 -1.5793478606 -0.0389453096  
C 3.9465021703 -1.2785992807 -0.78888857  
C 4.9583870725 -2.1995620279 -0.9759042522  
H 1.2119638963 -4.4822211871 0.9775274348  
H 5.6772718913 -4.2056915662 -0.5534508285  
H 3.5430126819 -4.8957514579 0.5187635987  
C 1.3295624151 -3.4394137875 0.6974040015  
C 1.68495751 -0.6528244785 0.2312357322  
H 4.0140916783 -0.3350026473 -1.3057180274  
H 5.8202196953 -1.9260200313 -1.5779506274  
C 0.3945233812 -1.236835214 0.2728621709  
C 0.2420485078 -2.6186485087 0.5471520402  
H -0.7623620458 -3.0188920977 0.6384485002  
C 1.7644335793 0.8071309506 0.4955458426  
C 2.71436935 1.8142521803 0.0392894744  
C 4.1058801347 1.5963420787 -0.1141420154  
C 2.2628015608 3.161951717 -0.1399262607  
C 0.3391730543 2.6333220786 1.1714677918  
C 4.9440592721 2.5811331719 -0.6037911178  
H 4.5414577049 0.6739382073 0.2336241989  
C 3.1204163452 4.1395438758 -0.6956728648  
C 0.9918275951 3.5211621986 0.3842586305  
H -0.5561678917 2.8422382474 1.7401756935  
C 4.4422626637 3.8479466325 -0.9592615392  
H 6.0076175271 2.3774935054 -0.6856603923  
H 2.7263788234 5.1391174144 -0.8555239718  
H 0.5978395759 4.5228237788 0.252069264  
H 5.1035019124 4.6048289968 -1.3696016095  
O 0.1178247912 0.6160217945 2.1768804968  
N 0.7742656639 1.3212701493 1.3148847218  
C -0.8351635152 -0.4698309512 -0.0318358618  
C -2.0175914544 -0.6532918348 0.7034212743  
C -0.8485761423 0.4191913053 -1.1185036805  
C -3.1934907172 0.0295378443 0.3844681594  
H -2.0088419184 -1.3189687475 1.561020116  
C -2.0167768405 1.1050885346 -1.4494050129  
H 0.0502208991 0.5536266418 -1.7118637683  
C -3.1801520505 0.9138323399 -0.7050958357  
H -4.0880785568 1.4499610514 -0.970448403  
C -4.4419912976 -0.1523574191 1.2111170899  
H -4.3768042609 -1.043092409 1.842582639  
H -4.6067415496 0.7092041459 1.8705040157  
H -5.3302156331 -0.2459803223 0.5770382242  
H -2.0210717818 1.7822572223 -2.299048839

50

**3m** C,M=0,1 E=-1171.6413122 ZPE-Corr=0.403772 E-Corr-298=0.427275 H-Corr-298=0.428220 G-Corr-298=0.348840 NImag=0

C 3.9702183245 0.7009037969 1.6971318364  
C 4.0533123478 -0.3891527695 0.8604562385  
C 2.9538673957 -0.7630524063 0.0428470423  
C 1.7492028405 0.0090673248 0.0955807669  
C 1.6943275438 1.1262124811 0.9722337289  
C 2.7780073821 1.4630689819 1.7524344656  
H 3.9275205531 -2.4752811814 -0.8541241442  
H 4.8164163654 0.9793364041 2.3183405168  
H 4.9623106781 -0.9828256408 0.8122423209  
C 3.0130574667 -1.8892195448 -0.8202537409  
C 0.6463560246 -0.3705885895 -0.7300134535  
H 0.7845797514 1.7149582881 1.0265370798  
H 2.7202667813 2.3213833952 2.4154981455  
C 0.7417967886 -1.4646027142 -1.5840650353  
C 1.9406586347 -2.2288786719 -1.6075113465  
H 2.0004932748 -3.0802886188 -2.2783689139



|   |               |               |               |
|---|---------------|---------------|---------------|
| C | -0.6475366295 | 0.3494063529  | -0.6070085512 |
| C | -1.7647655309 | -0.1981610953 | 0.0819588156  |
| C | -1.6914774519 | -1.4550644705 | 0.7387326139  |
| C | -3.0008192902 | 0.5176314082  | 0.09868833    |
| C | -1.940476849  | 2.262232977   | -1.1900115113 |
| C | -2.8011030341 | -1.971706559  | 1.3715870796  |
| H | -0.7557421614 | -2.0012724856 | 0.7380758465  |
| C | -4.1229750842 | -0.0381222504 | 0.7582205773  |
| C | -3.0444078821 | 1.7729315063  | -0.563312158  |
| H | -1.8921060103 | 3.2044264913  | -1.718655093  |
| C | -4.0261654894 | -1.2637934177 | 1.3813534939  |
| H | -2.7354636768 | -2.9338804388 | 1.8704631691  |
| H | -5.056051158  | 0.5177534872  | 0.7609686953  |
| H | -3.9613093545 | 2.3528072446  | -0.5769568875 |
| H | -4.8888681036 | -1.6893812566 | 1.8846480396  |
| O | 0.2479165598  | 2.0545677289  | -1.8776636328 |
| N | -0.7497145242 | 1.5517283462  | -1.2123121532 |
| C | -0.3941115206 | -1.8394778725 | -2.4625782737 |
| C | -0.9050015232 | -3.1464958912 | -2.4467216512 |
| C | -0.990487808  | -0.8800336567 | -3.2874548787 |
| C | -2.0141682263 | -3.4911066231 | -3.2220953363 |
| H | -0.4483020216 | -3.890401687  | -1.7994356987 |
| C | -2.1091884923 | -1.1981538983 | -4.0677587489 |
| H | -0.5718119299 | 0.1220462165  | -3.3290913197 |
| C | -2.6087559346 | -2.5024465194 | -4.0215202179 |
| H | -3.4804804785 | -2.7586910576 | -4.620049047  |
| C | -2.7507424036 | -0.1397155195 | -4.929547534  |
| H | -3.6559688616 | -0.5130487238 | -5.4165369005 |
| H | -3.0210791352 | 0.7389393264  | -4.3322595014 |
| H | -2.0636630033 | 0.2046946816  | -5.7118413826 |
| C | -2.5790128284 | -4.8893162741 | -3.1943960288 |
| H | -3.6266581787 | -4.8871959775 | -2.871081587  |
| H | -2.5531577721 | -5.3468749297 | -4.1905469235 |
| H | -2.0167003846 | -5.5336349578 | -2.5127574709 |

50

**TS1\_rot\_3m** C,M=0,1 E=-1171.5751339 ZPE-Corr=0.402932 E-Corr-298=0.425272 H-Corr-298=0.426216 G-Corr-298=0.351819

NImag=1 -17.1253

|   |               |               |               |
|---|---------------|---------------|---------------|
| C | -4.4912067421 | -2.8328247322 | 0.5320700375  |
| C | -3.3857510663 | -3.512432251  | 0.0738644992  |
| C | -2.1347266745 | -2.8591354106 | -0.0841414116 |
| C | -2.0340184426 | -1.4351773227 | 0.096031322   |
| C | -3.1573900143 | -0.8121200107 | 0.7015383028  |
| C | -4.3473850073 | -1.4813547999 | 0.9092473395  |
| H | -1.0418592291 | -4.7001473366 | -0.4206312652 |
| H | -5.439256192  | -3.3441900906 | 0.6690115641  |
| H | -3.4325074788 | -4.5802145035 | -0.1227474292 |
| C | -0.9590683802 | -3.6260949094 | -0.2815216032 |
| C | -0.7598672588 | -0.7862530073 | -0.1921313087 |
| H | -3.0591370031 | 0.1859905575  | 1.096293794   |
| H | -5.1684398407 | -0.9646987227 | 1.3980965194  |
| C | 0.3846191974  | -1.6122199779 | -0.056388143  |
| C | 0.2630136833  | -3.0217153899 | -0.1419066833 |
| H | 1.1664001979  | -3.6208895111 | -0.0982512367 |
| C | -0.5276346225 | 0.6137925594  | -0.6350452474 |
| C | -1.2696983151 | 1.8401063056  | -0.3695265642 |
| C | -2.6821553442 | 1.9281982324  | -0.303668642  |
| C | -0.555963149  | 3.0807425914  | -0.306034972  |
| C | 1.2790175376  | 2.0164824829  | -1.4013518652 |
| C | -3.3206912972 | 3.1150029293  | 0.0061427403  |
| H | -3.2814345312 | 1.0760445893  | -0.5800706191 |
| C | -1.2184445332 | 4.2725085361  | 0.068952755   |
| C | 0.7879944864  | 3.1084321686  | -0.7677207103 |
| H | 2.2257599946  | 1.9681648096  | -1.9208984443 |
| C | -2.5844628847 | 4.2886277255  | 0.2580448031  |
| H | -4.406174122  | 3.1421016818  | 0.0255124174  |
| H | -0.6331683159 | 5.1842211323  | 0.1471233227  |
| H | 1.3748337636  | 4.0190917399  | -0.7193910631 |
| H | -3.093861112  | 5.2083395509  | 0.5285194395  |
| O | 1.1273018285  | -0.1166693258 | -2.1493634095 |
| N | 0.5868570014  | 0.8117088377  | -1.4300497924 |
| C | 1.730743761   | -1.0695062471 | 0.2403821354  |
| C | 2.8891740699  | -1.6122397437 | -0.344159281  |
| C | 1.8686219665  | -0.0269396544 | 1.1660266982  |
| C | 4.1549004354  | -1.1204708847 | -0.0280940319 |
| H | 2.7941332434  | -2.4020563125 | -1.0827262057 |

C 3.1268561523 0.4940861782 1.49174268  
H 0.9830141329 0.3804560811 1.6451508534  
C 4.257609636 -0.06290831 0.8898227309  
H 5.2410142071 0.33108725 1.1379630016  
C 3.2388299299 1.6469562203 2.4574194358  
H 2.8219682043 2.5621046107 2.0181265571  
H 2.6803359862 1.4520590467 3.3797985121  
H 4.2800999686 1.8478192594 2.7247529218  
C 5.3947334791 -1.6954333587 -0.6668800934  
H 6.0829958567 -2.0923994185 0.0888753462  
H 5.1481981756 -2.5065411806 -1.3577062271  
H 5.9436426608 -0.9296676646 -1.2277944795  
50

**3o** C,M=0,1 E=-1767.0692261 ZPE-Corr=0.358220 E-Corr-298=0.385335 H-Corr-298=0.386279 G-Corr-298=0.297403 NImag=0

C 5.4046834712 -0.2720681013 0.3207925424  
C 4.7259719551 -1.4637316292 0.4398121371  
C 3.316175978 -1.5153489679 0.2762653727  
C 2.6036057499 -0.3080187408 -0.0158577375  
C 3.3323962857 0.9065468945 -0.1285651946  
C 4.6994578729 0.9225087568 0.035177531  
H 3.1383136956 -3.6424872751 0.6319239449  
H 6.4829288889 -0.2426007626 0.4469208027  
H 5.257611811 -2.3851135803 0.6615257077  
C 2.5930769723 -2.7306543489 0.4048138855  
C 1.1866475357 -0.3646890922 -0.1810784168  
H 2.800617054 1.8278599163 -0.342788426  
H 5.2438282496 1.8578300027 -0.0560463041  
C 0.5110559332 -1.5753514632 -0.0724250385  
C 1.2304016938 -2.7604149491 0.2367569967  
H 0.6861211881 -3.6960630574 0.3187530799  
C 0.4128638972 0.8912292107 -0.3664281722  
C -0.3055757533 1.5071285068 0.6942026284  
C -0.291109317 0.9751849663 2.0107311621  
C -1.0825267671 2.6762741459 0.4291176068  
C -0.367875295 2.5600127808 -1.8745502186  
C -1.0229587929 1.5802250313 3.0092302844  
H 0.3010177359 0.0924383101 2.2214294435  
C -1.8210869428 3.276771454 1.4764189112  
C -1.0824878495 3.1812966487 -0.8976629461  
H -0.3240783232 2.8735674528 -2.9084849509  
C -1.7942528316 2.7365498257 2.7442558625  
H -1.0069637939 1.1663077463 4.0128799216  
H -2.4080747862 4.164526652 1.2602619458  
H -1.6605715306 4.0648702705 -1.1465568386  
H -2.3639737226 3.1972732018 3.5453299011  
O 0.9920311303 0.8461397333 -2.5979918022  
N 0.3762126706 1.421275478 -1.6075826022  
C -0.957851751 -1.6209780374 -0.2717945753  
C -1.8003210504 -2.1762488642 0.7008371325  
C -1.5240643256 -1.052972584 -1.4169643375  
C -3.1824224379 -2.1325445022 0.5347269222  
H -1.3732315358 -2.6154366822 1.5948170533  
C -2.9112103517 -0.9954676699 -1.5614505963  
H -0.8779006761 -0.6586762325 -2.1955249353  
C -3.7518578194 -1.5305120195 -0.5909225173  
H -4.828226565 -1.481631115 -0.7055018929  
C -3.4646719597 -0.3279736977 -2.7868813726  
C -4.099557504 -2.6902239776 1.5847168194  
F -3.4351193708 -3.3357402516 2.5658934878  
F -4.8331072394 -1.7154529273 2.1760617492  
F -4.9874007408 -3.5673606792 1.0576715436  
F -2.9983105353 0.939982213 -2.9100596192  
F -3.1052347383 -0.9772456893 -3.9195393981  
F -4.8122245262 -0.2574146108 -2.7778736532  
50

**TS1\_rot\_3o** C,M=0,1 E=-1767.004003 ZPE-Corr=0.357116 E-Corr-298=0.383135 H-Corr-298=0.384079 G-Corr-298=0.299633  
NImag=1 -20.5615

C -4.4813140501 -2.7945706053 0.5971309087  
C -3.3888537229 -3.4884516377 0.1305166245  
C -2.1338702733 -2.8473875768 -0.0487400655  
C -2.0207047181 -1.4225046354 0.1174252334  
C -3.1310503869 -0.7818287514 0.7284229304  
C -4.3225844217 -1.4400575378 0.9583412511  
H -1.0627432753 -4.7019464889 -0.3799261611  
H -5.431799406 -3.296325916 0.7513432588

H -3.4475460898 -4.5574650764 -0.055244824  
 C -0.9685274188 -3.6276562154 -0.2522593222  
 C -0.7443091844 -0.7872767256 -0.1886310788  
 H -3.0222671686 0.2229576939 1.1039622451  
 H -5.1341772036 -0.9120476794 1.4506280379  
 C 0.3895168436 -1.6266539756 -0.0583031969  
 C 0.2616302809 -3.0339470365 -0.1306840848  
 H 1.1610228953 -3.6396642293 -0.0889890421  
 C -0.5040261617 0.6117284373 -0.6222116987  
 C -1.2732756739 1.8267225059 -0.3837826994  
 C -2.6879918145 1.8924558072 -0.3799688773  
 C -0.5784167934 3.0751140582 -0.2853988905  
 C 1.3113729083 2.041346077 -1.3144007656  
 C -3.3550442424 3.0707989828 -0.0990064215  
 H -3.2626280094 1.029676393 -0.6770730028  
 C -1.2727221299 4.2571349178 0.0615910259  
 C 0.7834397395 3.120803119 -0.6890719773  
 H 2.2762803528 2.0096116877 -1.8007415508  
 C -2.6461935333 4.2536819227 0.186621707  
 H -4.4404844186 3.0837748904 -0.1275111817  
 H -0.7041216374 5.1763307457 0.1684068611  
 H 1.3589009158 4.0358158884 -0.60583593  
 H -3.1798383491 5.16600605 0.4341171393  
 O 1.2060955362 -0.0851301353 -2.0931269542  
 N 0.6347296446 0.8287971024 -1.3788559461  
 C 1.7376381064 -1.0870986007 0.2310531439  
 C 2.8884173859 -1.5999345901 -0.3861018549  
 C 1.8828683639 -0.0606912891 1.1716648056  
 C 4.1443869417 -1.0889461589 -0.0698663652  
 H 2.795440147 -2.3771874898 -1.1346638099  
 C 3.1452091165 0.4581961014 1.4667773097  
 H 1.0071497214 0.3320367865 1.6757817039  
 C 4.2857428431 -0.0484305743 0.8514785768  
 H 5.2634934484 0.3563706809 1.0815413751  
 C 3.2385034392 1.6181427254 2.4135119804  
 C 5.3717317125 -1.6844905212 -0.6955595768  
 F 2.8027968082 2.7677919584 1.8364478058  
 F 4.5013407381 1.8461220585 2.8331631014  
 F 2.4747095335 1.4340754526 3.5159316532  
 F 6.3475129028 -0.7648956692 -0.8759951167  
 F 5.1156398644 -2.2399374486 -1.9006544586  
 F 5.9046976931 -2.6640920085 0.0776101947

31

**1b** C,M=0,1 E=-747.5585552 ZPE-Corr=0.248884 E-Corr-298=0.262736 H-Corr-298=0.263680 G-Corr-298=0.208202 NImag=0

C 2.9555966757 -0.6572636826 -0.0371870078  
 C 1.7508508618 0.0333369093 0.1313633548  
 H 4.0296170623 -2.2021987037 -1.0844231614  
 C 3.0810140905 -1.6841379929 -0.975084703  
 C 0.6543833321 -0.332699032 -0.6772170137  
 C 0.778282095 -1.3703743698 -1.6090379402  
 C 1.9894902078 -2.0446906623 -1.7645601908  
 H -0.0803510625 -1.6418549595 -2.2160293702  
 H 2.0764412734 -2.8430100848 -2.4955256646  
 C -0.6578965827 0.3417231274 -0.5256808189  
 C -1.7917337262 -0.2975979356 0.0512356486  
 C -1.7221790096 -1.6225955303 0.5609210646  
 C -3.031965165 0.4076549625 0.1416138529  
 C -1.9559340309 2.3099687076 -0.8808423071  
 C -2.8374989835 -2.2139561285 1.1134501092  
 H -0.7836738712 -2.1617948553 0.5136156399  
 C -4.1604972167 -0.2271953946 0.7129054133  
 C -3.0696493926 1.7389343847 -0.3492536822  
 H -1.9019259179 3.3156462855 -1.2747923514  
 C -4.0667603483 -1.5175904944 1.1881790958  
 H -2.7718604846 -3.2265140029 1.5001684246  
 H -5.0955349442 0.3223066279 0.7703649621  
 H -3.9879206933 2.3146689489 -0.3008542585  
 H -4.9338837171 -2.0022632417 1.6262506879  
 O 0.2555237364 2.2319956955 -1.504328149  
 N -0.7570279721 1.6159155323 -0.9724069659  
 H 3.8075425037 -0.3850146161 0.5802100761  
 C 1.6280558993 1.1404762637 1.1436376257  
 H 1.4666833976 2.0987209329 0.6366080404  
 H 0.7756415937 0.9781831428 1.812850761  
 H 2.531262609 1.219247386 1.7540901778

31

**TS1\_rot\_1b** C,M=0,1 E=-747.5038854 ZPE-Corr=0.249343 E-Corr-298=0.261951 H-Corr-298=0.262895 G-Corr-298=0.210768  
NImag=1 -71.0138

|   |               |               |               |
|---|---------------|---------------|---------------|
| C | 3.3058731482  | -1.4243868923 | 0.3501928807  |
| C | 1.9341522079  | -1.2818330424 | 0.0579409447  |
| H | 5.2247458089  | -0.5383926821 | 0.7561550071  |
| C | 4.1765805189  | -0.3618947711 | 0.5334076152  |
| C | 1.409735738   | 0.0394787681  | -0.1362783132 |
| C | 2.3217157936  | 1.1016125807  | 0.1230401376  |
| C | 3.6543312431  | 0.9250528938  | 0.4538989542  |
| H | 1.9723065645  | 2.1177957321  | 0.0429297209  |
| H | 4.2751402582  | 1.7968039624  | 0.6387157969  |
| C | -0.0119524264 | 0.4834798686  | -0.3856624703 |
| C | -1.2542905542 | -0.2500274422 | -0.1820884417 |
| C | -1.4506603655 | -1.5960414848 | -0.5734318836 |
| C | -2.4161237662 | 0.4413130883  | 0.2942798171  |
| C | -1.3461527699 | 2.4957212879  | -0.2631384575 |
| C | -2.6371427019 | -2.2608102519 | -0.3289824407 |
| H | -0.6918107725 | -2.0886725123 | -1.1537073699 |
| C | -3.6025382204 | -0.2674410356 | 0.596392166   |
| C | -2.3924155066 | 1.860167891   | 0.3142561804  |
| H | -1.2843371549 | 3.5596149112  | -0.4461950213 |
| C | -3.7071773818 | -1.6136324261 | 0.3188529877  |
| H | -2.7487059305 | -3.2866155625 | -0.6673325657 |
| H | -4.4457902066 | 0.2878331193  | 0.9967652511  |
| H | -3.2408012764 | 2.4280003757  | 0.6799588193  |
| H | -4.6253487208 | -2.15182247   | 0.5330901424  |
| O | 0.6496980932  | 2.5437005149  | -1.3349565768 |
| N | -0.2127290782 | 1.8129061578  | -0.6918291782 |
| H | 3.6887572299  | -2.4343021276 | 0.4604761727  |
| C | 1.2102001709  | -2.6104596733 | 0.0549241627  |
| H | 0.3118617495  | -2.602603437  | 0.6720390605  |
| H | 0.9352566287  | -2.9417438174 | -0.9511696477 |
| H | 1.8755296794  | -3.3743205231 | 0.4631195493  |

31

**TS2\_rot\_1b** C,M=0,1 E=-747.5103631 ZPE-Corr=0.248929 E-Corr-298=0.261643 H-Corr-298=0.262587 G-Corr-298=0.210316  
NImag=1 -75.0724

|   |               |               |               |
|---|---------------|---------------|---------------|
| C | -3.7095737037 | -0.5231649703 | 0.0098524351  |
| C | -2.6161869211 | 0.3612396821  | 0.0117228813  |
| H | -4.4830776007 | -2.5291593896 | -0.1313631151 |
| C | -3.5979427165 | -1.9000925198 | -0.138813041  |
| C | -1.2924466752 | -0.2044468736 | -0.0166883164 |
| C | -1.2316163132 | -1.5874443881 | -0.3431406685 |
| C | -2.3347936514 | -2.425827706  | -0.3897031841 |
| H | -0.2826948944 | -2.02395002   | -0.6078250064 |
| H | -2.1983021623 | -3.4751988072 | -0.6329971027 |
| C | 0.0314306161  | 0.4677581159  | 0.1117149554  |
| C | 1.3032530329  | -0.2458490841 | 0.106553587   |
| C | 1.4785870399  | -1.5544763681 | 0.6374730346  |
| C | 2.4872033459  | 0.4245222944  | -0.3380514917 |
| C | 1.2950324364  | 2.4897220778  | -0.2128903197 |
| C | 2.7009634598  | -2.1950846165 | 0.5875858977  |
| H | 0.6577240154  | -2.0433062132 | 1.1440523688  |
| C | 3.7170800012  | -0.2694433393 | -0.4299725183 |
| C | 2.4156642466  | 1.8224257962  | -0.5785314809 |
| H | 1.1804396633  | 3.5651888095  | -0.203388931  |
| C | 3.8230413966  | -1.5730577077 | 0.0030934328  |
| H | 2.7979649923  | -3.1845538727 | 1.0242003444  |
| H | 4.5833735731  | 0.2657906061  | -0.8080787498 |
| H | 3.275467631   | 2.3683141518  | -0.951256257  |
| H | 4.7712764955  | -2.0984302232 | -0.0543141518 |
| O | -0.7358389493 | 2.5666999036  | 0.8020412739  |
| N | 0.1626111732  | 1.8261600662  | 0.2490871227  |
| H | -4.7021012234 | -0.0874631228 | 0.0828004039  |
| C | -3.0273148576 | 1.8148542971  | -0.1092137813 |
| H | -2.9816449075 | 2.3551658663  | 0.8378375276  |
| H | -2.4112296282 | 2.3612212841  | -0.8222812317 |
| H | -4.0604709145 | 1.8451482712  | -0.469083918  |

45

**3q** C,M=0,1 E=-1093.1825811 ZPE-Corr=0.362550 E-Corr-298=0.383711 H-Corr-298=0.384655 G-Corr-298=0.312107 NImag=0

|   |              |               |               |
|---|--------------|---------------|---------------|
| C | 3.5378284169 | -2.313940836  | 0.3790577092  |
| C | 3.0942764605 | -1.0752085237 | -0.0935461176 |
| H | 2.9938123508 | -4.2370490185 | 1.18294779    |
| C | 2.6311929618 | -3.2819117107 | 0.8137139942  |
| C | 1.7083621905 | -0.8239409283 | -0.1306367172 |

C 0.7827045282 -1.8062783224 0.2773455814  
 C 1.262864453 -3.032076402 0.7606419251  
 H 0.553383847 -3.7930672747 1.0712352608  
 C 1.221262856 0.529295283 -0.5033908001  
 C 0.7612501153 1.4658734781 0.4643533199  
 C 0.7528018462 1.15862391 1.8508295421  
 C 0.2843419846 2.7431735582 0.0387748158  
 C 0.7733848123 2.1014875679 -2.2355623141  
 C 0.2819572786 2.0789908786 2.7619313577  
 H 1.1209770494 0.1957957432 2.1841576092  
 C -0.1912682329 3.6685371576 0.9980895894  
 C 0.3115506705 3.0266810221 -1.3521691999  
 H 0.8222627934 2.236532802 -3.3074156225  
 C -0.1956859068 3.3411328746 2.3370676089  
 H 0.2782991423 1.8340720905 3.8197403208  
 H -0.551423167 4.6352497411 0.6584657587  
 H -0.0380246716 3.9846211701 -1.7225641692  
 H -0.5633024315 4.051674186 3.0710310309  
 O 1.5996231962 0.0077912958 -2.7222833359  
 N 1.2200948464 0.8590362585 -1.8117458786  
 H 4.6049185072 -2.51590138 0.4121505866  
 C 4.0723698276 -0.0269827845 -0.5553499735  
 H 3.921342877 0.1885837246 -1.6194474911  
 H 3.941215368 0.9139692449 -0.0091582272  
 H 5.1032423938 -0.3615270264 -0.4148329015  
 C -0.675757906 -1.5509022176 0.1919336365  
 C -1.511386135 -1.7519027594 1.303205116  
 C -1.2538372837 -1.0907507056 -0.9986508421  
 C -2.8728076815 -1.4860635204 1.230783178  
 H -1.0828533693 -2.0995834917 2.2386948131  
 C -2.6195709739 -0.8192992964 -1.0866926626  
 H -0.6302012953 -0.9637055956 -1.8791034661  
 C -3.4332107477 -1.0125443507 0.035762226  
 H -3.5202316286 -1.6281990231 2.0906483693  
 H -3.0332766121 -0.4690989816 -2.0244410238  
 O -4.7794734917 -0.7724193778 0.0654385893  
 C -5.3994296584 -0.2805759094 -1.1216575389  
 H -5.3023988163 -0.9938099311 -1.9485157113  
 H -6.4551439611 -0.1537937278 -0.8758768579  
 H -4.9775828032 0.6858931087 -1.4214758776  
 45

**TS1\_rot\_3q** C,M=0,1 E=-1093.1129518 ZPE-Corr=0.361671 E-Corr-298=0.381599 H-Corr-298=0.382544 G-Corr-298=0.314315  
 NImag=1 -34.1017

C -2.3936687878 3.6211415278 -0.0494546604  
 C -2.7704414181 2.2861976672 -0.2601606039  
 H -0.8709607279 5.0228146175 0.5577502648  
 C -1.1261634205 3.9810995345 0.3880014074  
 C -1.8681108196 1.2462873119 0.1454858822  
 C -0.4826184755 1.6472911124 0.2502443655  
 C -0.1503856682 2.9894438697 0.4368891468  
 H 0.895702023 3.2595621996 0.5416078721  
 C -2.2071733944 -0.1741189119 0.3911371482  
 C -3.4240968055 -0.90312464 0.061724164  
 C -4.7174264805 -0.3340502555 0.1246620482  
 C -3.3543098665 -2.3121664673 -0.1787077972  
 C -1.2068299281 -2.3140549796 0.8606317615  
 C -5.8428998393 -1.0596830344 -0.2182759935  
 H -4.8353062075 0.6614465244 0.520768559  
 C -4.5053560446 -3.0232303648 -0.5899368404  
 C -2.1483633515 -2.9874592731 0.1560217736  
 H -0.3271691805 -2.7538323852 1.3101193788  
 C -5.7352794338 -2.399759152 -0.6392992389  
 H -6.820579033 -0.5941282576 -0.1369065304  
 H -4.4080867018 -4.0833402133 -0.8060034039  
 H -2.0276713871 -4.047298124 -0.039501311  
 H -6.6215703435 -2.9531299739 -0.9341757515  
 O -0.4464331054 -0.4593518933 1.9279070108  
 N -1.3045161394 -0.946514187 1.0967902415  
 H -3.1129055169 4.3956080344 -0.303615468  
 C -4.0211768887 2.1400511865 -1.1100681625  
 H -4.0876202695 1.1768513023 -1.6111611188  
 H -4.9548702538 2.3134671596 -0.5663615366  
 H -3.968566994 2.9080816246 -1.8886568467  
 C 0.6361156862 0.7200153274 -0.0390563608  
 C 1.8470553622 0.7612327109 0.6786553682

C 0.5517572829 -0.1602880859 -1.1265235257  
C 2.9144978305 -0.0532065632 0.3349021462  
H 1.9354598257 1.4192482752 1.5374156393  
C 1.615994288 -0.9914812982 -1.4828387283  
H -0.3561621935 -0.1891602598 -1.7208446599  
C 2.8033914355 -0.9412130035 -0.7464067539  
H 3.8423238517 -0.0305835115 0.8983533414  
H 1.5129977382 -1.6516646712 -2.3355859387  
O 3.9081289019 -1.7068753342 -1.0026880029  
C 3.842885601 -2.6362473283 -2.0824988666  
H 3.685689528 -2.1261458446 -3.0401953755  
H 4.8087015851 -3.1441965366 -2.0981357988  
H 3.0466493863 -3.3738237059 -1.9275756546

45

**TS2\_rot\_3q** C,M=0,1 E=-1093.1157987 ZPE-Corr=0.361506 E-Corr-298=0.381467 H-Corr-298=0.382411 G-Corr-298=0.314219  
NImag=1 -23.9145

C -3.43942141 -3.2482878438 -0.1964824893  
C -3.5010861983 -1.8623659972 -0.3702791129  
H -2.2736657158 -4.9469347623 0.4508200056  
C -2.2961401756 -3.8739915951 0.2851779033  
C -2.4001432811 -1.039656742 0.0553545199  
C -1.1397170459 -1.7282096596 0.1900751478  
C -1.1354876057 -3.1146848519 0.3893113264  
H -0.1795274275 -3.6092762224 0.5299558334  
C -2.6166105941 0.4118368561 0.247345627  
C -1.6498619096 1.5010708253 0.3090618025  
C -0.3716071818 1.3858749544 0.903605244  
C -2.0438327831 2.809820536 -0.1114185871  
C -4.3195294177 2.1121388663 0.0672992202  
C 0.5255720454 2.4367499524 0.8950740336  
H -0.108964681 0.4811840569 1.4231802214  
C -1.094522518 3.8569287629 -0.1712819134  
C -3.4293489406 3.058923607 -0.315039206  
H -5.3914535823 2.2446798992 0.1220288875  
C 0.189534404 3.6667750978 0.2961608876  
H 1.4921154986 2.3109811461 1.373345984  
H -1.4173927791 4.8269030243 -0.5385679772  
H -3.7781244311 4.0273974384 -0.656610234  
H 0.9125433131 4.4761826033 0.2646358806  
O -4.8237125698 0.1040550559 1.0088923142  
N -3.9115046145 0.8405622045 0.4667679427  
H -4.3033079473 -3.8413921986 -0.4849430362  
C -4.6897098747 -1.354365437 -1.1497506618  
H -5.5825044708 -1.2368745221 -0.5306295749  
H -4.4920237072 -0.3900236312 -1.6238597494  
H -4.9103396542 -2.0768002717 -1.9423843104  
C 0.192174421 -1.1533812807 -0.1330786194  
C 1.3270017465 -1.4046101298 0.6480017829  
C 0.3614093786 -0.4339605872 -1.3299829109  
C 2.583601761 -0.9153932636 0.2885772756  
H 1.2251001038 -1.9592147527 1.576271268  
C 1.6059018614 0.0472234925 -1.7084785945  
H -0.4994164825 -0.246912266 -1.9641283737  
C 2.7241408883 -0.1788677847 -0.8935729366  
H 3.4344801805 -1.1100161517 0.9298677697  
H 1.7348388083 0.605835942 -2.6304089654  
C 5.068058714 0.1644714768 -0.5368312143  
H 5.3111906647 -0.8988470649 -0.4267017221  
H 5.8786953626 0.6679900269 -1.0662059617  
H 4.9459763263 0.6156941155 0.4548730567  
O 3.9031300915 0.3516833654 -1.3389751233

28

**N-Ac-(L)-Phe-OH** C,M=0,1 E=-707.5406064 ZPE-Corr=0.227704 H-Corr-298=0.243031 G-Corr-298=0.184391 NImag=0

O -1.7647568984 -1.9140984797 -1.4044796375  
C -2.707034773 -2.2781101336 -0.7241382998  
C -2.9349216392 -1.8639442872 0.7154318391  
O -3.6907454538 -3.0651735678 -1.1778640238  
N -1.7354581197 -1.1956423974 1.1764106841  
C -4.2084130265 -0.9742486703 0.8254536597  
H -3.1046076722 -2.7663355785 1.3120420679  
C -1.5279109795 -0.8985488582 2.4777368528  
C -4.0727626177 0.317495554 0.0608936284  
H -5.0578907276 -1.5603201901 0.4641203937  
H -4.3611209884 -0.7791514466 1.8888504434  
O -2.3185912369 -1.249767061 3.3673227399

C -4.3974019693 0.3842281268 -1.301421528  
C -3.5574135133 1.4603980502 0.6871572458  
C -4.2114670847 1.565612898 -2.0209214736  
H -4.8008656985 -0.4946305768 -1.7982270027  
C -3.3696275554 2.6430435122 -0.0300237473  
H -3.3102333935 1.4201596407 1.7447263799  
C -3.6946627019 2.6981617223 -1.3873611619  
H -4.4722718977 1.6024443845 -3.075028233  
H -2.9717525348 3.5213171569 0.4708889969  
H -3.5507782103 3.6184137945 -1.9464103159  
C -0.2823880355 -0.1021158526 2.7860947761  
H 0.2206768413 -0.5500617995 3.6470477003  
H 0.4109279924 -0.0483353178 1.9436603681  
H -0.5771661923 0.9151964546 3.0655620666  
H -3.5161304682 -3.2713410987 -2.1147779804  
H -1.1044038654 -0.849300829 0.4647171511

55

**A** C,M=0,1 E=-1541.8883115 ZPE-Corr=0.435593 H-Corr-298=0.465907 G-Corr-298=0.373904 NImag=0

O -0.6174779838 -1.4880115115 1.7434196579  
C 0.5952449856 -1.9230186161 2.0080938963  
C 1.6712281265 -1.557241106 0.9838421049  
O 0.8815358518 -2.5216971103 3.0392033251  
N 1.0460043406 -1.2763262046 -0.3100127524  
C 2.4123983144 -0.3001988603 1.5268564567  
H 2.36933602 -2.3932059606 0.9218834838  
C 1.6330432576 -1.474816855 -1.4477540847  
C 3.4986958744 0.1719233564 0.5984972885  
H 1.6692155844 0.4891029408 1.6764395493  
H 2.8216111026 -0.5721873187 2.5040941789  
O 1.0618524267 -1.0959891051 -2.5875916475  
C 3.2035421567 1.0629173533 -0.4427350082  
C 4.8037661956 -0.3241919552 0.7129511792  
C 4.1890782996 1.4430417265 -1.3550789454  
H 2.1973994623 1.4567498681 -0.5370848866  
C 5.7915411818 0.0545562757 -0.1966027251  
H 5.0424116009 -1.0165483353 1.5165738466  
C 5.4854091202 0.9360799317 -1.2371954342  
H 3.9436837445 2.1334866304 -2.1573382423  
H 6.799268644 -0.3385596236 -0.095060597  
H 6.2535118257 1.2298035113 -1.9469653752  
C 2.9478201957 -2.1463174911 -1.6807344838  
H 3.6509615667 -1.4128514704 -2.0858929717  
H 3.3742147584 -2.5881066515 -0.7843086523  
H 2.7992866743 -2.922372696 -2.4378465872  
Pd -0.8403013727 -0.5628662871 -0.0363505061  
O -1.073246666 0.3081922424 -1.8356876471  
N -2.7509237628 0.0917947877 0.217875829  
C -2.1653224211 1.0208607993 -1.9868798512  
C -3.1035760146 1.1115688663 -0.7798834448  
C -3.5706517057 -0.2642845605 1.1550334908  
O -2.4194422825 1.6407818483 -3.0150644294  
C -3.0116988915 2.5434636116 -0.1867909654  
H -4.1162628746 0.9526139896 -1.1584906086  
O -3.2091990012 -1.1158393905 2.1072640082  
C -4.9792099637 0.2087882544 1.320349  
C -1.6414816677 2.8544974109 0.3634451703  
H -3.2762259714 3.2369117622 -0.9902475352  
H -3.7687346993 2.6356221899 0.5964074148  
H -5.5956474674 -0.6384094977 1.6309717991  
H -5.0095694392 0.9550753663 2.1216789849  
H -5.3923959194 0.6482686694 0.4142572654  
C -0.6427562569 3.3834344236 -0.4658431058  
C -1.3232011997 2.5575608264 1.6956312474  
C 0.6439043531 3.6105074709 0.0252416058  
H -0.8777509902 3.6159048914 -1.5012160558  
C -0.0359078194 2.779502144 2.1885001761  
H -2.0888254046 2.1489702482 2.3496075146  
C 0.9524059466 3.3056752056 1.3531952177  
H 1.4056353896 4.0250490014 -0.6288613438  
H 0.193958716 2.5437924627 3.2238116579  
H 1.9552615144 3.4767511184 1.733073586  
H -2.2472744797 -1.3600682404 2.0684717209  
H 0.2354541743 -0.5662361475 -2.4491932093

61

**(R)-B** C,M=0,1 E=-1696.2181381 ZPE-Corr=0.475518 H-Corr-298=0.507310 G-Corr-298=0.413174 NImag=0

C 3.5653008462 -0.9267080956 -0.0639468497  
 C 2.179394043 -0.6629335168 -0.2226948294  
 C 2.0776740756 -2.2022231702 -2.0430154572  
 C 3.4069538201 -2.4806068075 -1.9437630318  
 C 4.2004367881 -1.8544499095 -0.9483334819  
 H 3.8507141167 -3.1931961707 -2.6300724075  
 C 1.4466299846 0.3083929443 0.6331472277  
 C 1.561273368 1.7053564848 0.3538147127  
 C 0.77934375 -0.137793407 1.776435822  
 C 1.0164182145 2.6351069896 1.2968320253  
 C 0.2200316403 0.8071794261 2.6875454949  
 C 0.3449980542 2.1508810577 2.4554305734  
 H -0.2882087618 0.4293024934 3.5654890974  
 H -0.0635527772 2.8721346146 3.1572821886  
 Pd -1.0093209831 -0.9371384645 0.296377615  
 H 0.8334152274 -1.1825640942 2.0691691259  
 N 1.4956726002 -1.2986490943 -1.183421586  
 O 0.1946596747 -1.0461388613 -1.3861631854  
 C 4.3328388935 -0.2888305531 0.9460911461  
 H 3.8560357587 0.4116880671 1.6219763558  
 C 5.5830353678 -2.118084697 -0.8001534879  
 C 6.3058759504 -1.4827537743 0.1855850018  
 H 7.3663437301 -1.6858420894 0.297197627  
 C 5.676478275 -0.5651014476 1.0611737952  
 H 6.2616712824 -0.0767921231 1.8338820326  
 H 6.0562604716 -2.8252428937 -1.4741218389  
 H 1.396664713 -2.6377359922 -2.7610616257  
 O -2.4670890006 -1.9792183302 -0.687959988  
 C -3.6743989231 -1.7217180155 -0.2428823134  
 C -3.7496513267 -0.8067899428 0.9830740942  
 O -4.690294612 -2.1430657595 -0.7993113324  
 N -2.4579892946 -0.8564770682 1.6730652935  
 C -4.1591894557 0.6225045116 0.5285903822  
 H -4.5511643847 -1.1839305985 1.6197920714  
 C -2.3264283764 -1.4010343997 2.8967130175  
 C -3.2567581853 1.2189779063 -0.5250989967  
 H -5.1824789441 0.5466398783 0.1452304336  
 H -4.1813063424 1.2569136663 1.4196783129  
 O -1.2252725931 -1.7996583752 3.3429763433  
 C -3.39388187 0.8444718056 -1.8714006876  
 C -2.2323898125 2.1115261082 -0.1819797059  
 C -2.5104099336 1.319336851 -2.8398245264  
 H -4.1912330856 0.1644615373 -2.1574516001  
 C -1.3612204212 2.6078536673 -1.1547299372  
 H -2.1174653483 2.4191887162 0.8532754126  
 C -1.4871006636 2.2011191984 -2.4830684907  
 H -2.6280117467 1.0088712006 -3.8744472951  
 H -0.5883108281 3.3136620981 -0.8758705615  
 H -0.8024992841 2.5810587739 -3.2361985412  
 C -3.553180623 -1.4992627921 3.7932162241  
 H -4.1552985744 -2.3732999028 3.5194879026  
 H -3.2073902873 -1.6304439221 4.8200835882  
 H -4.1934667194 -0.6150524337 3.7366708174  
 C 2.2071704722 2.1975769451 -0.8101494208  
 C 2.3229205926 3.5533537057 -1.0243454777  
 H 2.6091312858 1.4970527445 -1.5345523468  
 H 2.8177740362 3.9200737105 -1.9181748267  
 C 1.7976962292 4.4734845154 -0.0866073276  
 C 1.1549157543 4.0234853384 1.0470175666  
 H 1.8979837063 5.5393293444 -0.2676997801  
 H 0.7402842035 4.7257032546 1.7642990393

61  
**(R)-TS** C,M=0,1 E=-1696.1993137 ZPE-Corr=0.470019 H-Corr-298=0.501351 G-Corr-298=0.407803 NImag=1 -1246.2398

C 3.4474230737 -1.0300345462 0.0366479856  
 C 2.2368573774 -0.4523189704 -0.4351189065  
 C 2.0783855654 -2.1486784401 -2.1154942931  
 C 3.2622221703 -2.7053433758 -1.7358742075  
 C 3.9830190559 -2.1737897176 -0.6357718458  
 H 3.6369572084 -3.5712889188 -2.2700731212  
 C 1.6097595988 0.7593696162 0.1383894424  
 C 2.2854651021 2.0142918012 0.0173102068  
 C 0.3446381292 0.670073613 0.7327967485  
 C 1.6613314062 3.1825360269 0.5710982467  
 C -0.2423564484 1.852954621 1.2691132344  
 C 0.3953034233 3.0655901369 1.2014881556



H -1.2033396501 1.7703276308 1.7627450603  
 H -0.0602704298 3.9563458432 1.625523174  
 Pd -0.9270629023 -0.7134418124 -0.2988122566  
 H 0.006108034 -0.3040045533 1.5565331943  
 N 1.5905255744 -1.0474197113 -1.4540296755  
 O 0.4084791793 -0.5636956303 -1.8855873188  
 C 4.1297781543 -0.5082053792 1.1679280507  
 H 3.7187872176 0.3439281833 1.6953934638  
 C 5.1939335343 -2.7457070152 -0.1768205603  
 C 5.842181976 -2.2103511326 0.9140520988  
 H 6.7693522012 -2.6521963835 1.2654570801  
 C 5.3022439952 -1.0908897787 1.5922235797  
 H 5.8177578041 -0.6914060179 2.4597544637  
 H 5.5929557511 -3.6115220458 -0.6958946824  
 H 1.4480883527 -2.5038989711 -2.9190143726  
 O -2.2528279402 -1.9048371607 -1.333333732  
 C -3.357296036 -2.1568020115 -0.6856491522  
 C -3.4834435934 -1.6124234247 0.7485330076  
 O -4.307216444 -2.7692537934 -1.1836548011  
 N -2.1805980573 -1.1251258713 1.1896055259  
 C -4.5791526155 -0.5140911907 0.7825472861  
 H -3.8196782357 -2.444444392 1.3749672932  
 C -1.7184754696 -1.2161657896 2.4181314071  
 C -4.2157441571 0.7066168056 -0.0266954484  
 H -5.4979738748 -0.9748483991 0.4057721786  
 H -4.7489354571 -0.2356958245 1.8264663655  
 O -0.5057221059 -0.8751699044 2.6881628621  
 C -4.3315413246 0.7053203039 -1.4252829865  
 C -3.7007823826 1.8469158708 0.6007799022  
 C -3.9193965547 1.8072677458 -2.1749407015  
 H -4.7461306465 -0.1644189015 -1.9270327892  
 C -3.2910449821 2.9536344587 -0.1455315613  
 H -3.6165906805 1.8630362027 1.6841814475  
 C -3.3919952887 2.9341008368 -1.5375378314  
 H -4.0162252563 1.7889559605 -3.2569845646  
 H -2.8912599462 3.828175722 0.3596413795  
 H -3.0744653301 3.7935242863 -2.1212091871  
 C -2.5715051481 -1.7303911013 3.5494094589  
 H -2.7315628814 -2.8080785869 3.4334105025  
 H -2.0600357264 -1.5502148085 4.4952736001  
 H -3.5494632211 -1.2433808183 3.5642369747  
 C 3.5295771869 2.1683711384 -0.6591286831  
 C 4.1352543147 3.4004011996 -0.7497357684  
 H 4.0021002036 1.3071925061 -1.1165494889  
 H 5.082576743 3.4976516855 -1.2713520714  
 C 3.5318445917 4.544752207 -0.174004108  
 C 2.3193534809 4.4361006154 0.4672320577  
 H 4.0250515465 5.5090712348 -0.2510214515  
 H 1.8395248345 5.310058126 0.8985231322

61

(R)-C C,M=0,1 E=-1696.2265929 ZPE-Corr=-0.476005 H-Corr-298=0.507659 G-Corr-298=0.413607 NImag=0

C 3.4426306525 -0.9057401147 -0.2379769529  
 C 2.1544620533 -0.3906351278 -0.587450386  
 C 1.9648453692 -2.0873353503 -2.2743747693  
 C 3.2329649297 -2.5299822076 -2.0572252287  
 C 4.0078477659 -1.9700934579 -1.0090755451  
 H 3.627447014 -3.3379674012 -2.6629293129  
 C 1.5150068249 0.7662472032 0.067937319  
 C 2.2447886021 2.0046547351 0.1786721108  
 C 0.2121666669 0.657316752 0.5703570587  
 C 1.6826311329 3.0644794666 0.9620211219  
 C -0.3075803523 1.7270594951 1.3472596816  
 C 0.4130125933 2.8775685774 1.5647344148  
 H -1.2966385151 1.6323668599 1.7779493118  
 H 0.0014657148 3.6768909061 2.1762189745  
 Pd -0.9698491167 -0.8112555686 -0.0871524305  
 H -0.1115547236 -0.6928196965 2.3368979873  
 N 1.4535786814 -1.0543369446 -1.5274517686  
 O 0.1759160486 -0.719622102 -1.7970000628  
 C 4.1668981422 -0.4182497485 0.8833537317  
 H 3.7324906424 0.3502553695 1.5089013792  
 C 5.2953592736 -2.4631239186 -0.6852976651  
 C 5.9864840162 -1.9469691712 0.3879254407  
 H 6.970779774 -2.3306947895 0.6376960882  
 C 5.4079779704 -0.9317702638 1.1856949566

H 5.9465605165 -0.5573464173 2.050489141  
 H 5.7143806483 -3.262145848 -1.2890534427  
 H 1.2781152514 -2.4894202016 -3.0064332418  
 O -2.3022499588 -2.2660586929 -0.880377985  
 C -3.4380478692 -2.2974651589 -0.2648484806  
 C -3.5712461991 -1.4734318079 1.0313576817  
 O -4.4381916046 -2.9130418556 -0.6618291965  
 N -2.2372413613 -1.0543039115 1.4887871366  
 C -4.5261436914 -0.2750512482 0.8013189858  
 H -4.0350845265 -2.1311439977 1.7707351016  
 C -1.9287659765 -1.0643095416 2.7410549649  
 C -4.0189454216 0.7312041234 -0.2040150708  
 H -5.4780647613 -0.7057343754 0.4740855553  
 H -4.6959596474 0.2137895108 1.7651992722  
 O -0.6751904812 -0.8198916663 3.131469439  
 C -4.029467364 0.4483815375 -1.5791790436  
 C -3.4869071324 1.9526189111 0.2226864274  
 C -3.4870064305 1.3496167273 -2.4947177106  
 H -4.4638645573 -0.4824553822 -1.9318498493  
 C -2.9445345744 2.858971123 -0.6906874564  
 H -3.4904415484 2.19019201 1.2829143604  
 C -2.9341935656 2.5553840485 -2.0526574443  
 H -3.4998931416 1.1127007732 -3.5549817227  
 H -2.5256393479 3.7966935077 -0.3369243142  
 H -2.511798259 3.2567804349 -2.7665769311  
 C -2.8593296169 -1.3545666359 3.8751784401  
 H -3.0133675869 -2.4366300731 3.9553368952  
 H -2.4159871179 -0.9977812674 4.805676751  
 H -3.829981773 -0.8792054208 3.7256042366  
 C 3.4699725823 2.2591260004 -0.5001417851  
 C 4.1214002658 3.4654301591 -0.3653996957  
 H 3.8910307599 1.500373079 -1.1488195821  
 H 5.0509404271 3.6347836152 -0.9011479683  
 C 3.5890551143 4.4881379808 0.4546078332  
 C 2.3889315628 4.2894456222 1.0974174387  
 H 4.1190655139 5.4302721341 0.5580421313  
 H 1.9497731663 5.0735419632 1.7083962876  
 61

(S)-B C,M=0,1 E=-1696.2119461 ZPE-Corr=0.474997 H-Corr-298=0.506911 G-Corr-298=0.411150 NImag=0

C 2.2484762262 2.141989907 0.2072648199  
 C 1.6899517338 0.9336902037 -0.2781511296  
 C 0.5214848521 2.1377892875 -1.9806212511  
 C 1.071415178 3.3198674618 -1.5840810621  
 C 1.941267392 3.3674863448 -0.4653401254  
 H 0.813109728 4.2285392952 -2.1159349395  
 C 2.0103954193 -0.4160772926 0.2406298811  
 C 3.2718316983 -0.9979011227 -0.0835214147  
 C 1.0656011991 -1.1415864036 0.9616984264  
 C 3.5371515164 -2.3396439248 0.3540873849  
 C 1.3356626249 -2.4698919757 1.3756653501  
 C 2.5437343785 -3.0518938935 1.0741807697  
 H 0.5758273579 -2.9923039335 1.9419034898  
 H 2.759487155 -4.067972239 1.3918346881  
 Pd -0.9898982811 -1.0033785436 -0.3964438253  
 H 0.174728785 -0.6338553445 1.3705167647  
 H -0.1748166875 2.0114599879 -2.7975712114  
 C 3.1041833125 2.1597870725 1.340050604  
 H 3.3321259945 1.2313446163 1.8508879935  
 C 2.4975333256 4.5770571487 0.0156537179  
 H 2.2577237684 5.5039672115 -0.4957523941  
 C 3.3240999689 4.5670874659 1.1177507665  
 H 3.7466565462 5.4964838268 1.4864624909  
 C 3.6277285004 3.3532136305 1.7819401264  
 H 4.2773132664 3.3678145438 2.651201875  
 N 0.8429990319 0.9770943666 -1.3209089481  
 O 0.3012995506 -0.1609699357 -1.7907572557  
 O -2.4048831009 -0.9941916619 -1.8288582045  
 C -3.6296257005 -1.1504629382 -1.386679223  
 C -3.7959132707 -1.3856741289 0.1092225526  
 O -4.608601944 -1.0555679053 -2.1287740536  
 N -2.5048584138 -1.7363968569 0.7054645655  
 C -4.4105920849 -0.0940593156 0.7313418888  
 H -4.5248116558 -2.1941729382 0.2224606413  
 C -2.404128264 -2.1080257833 1.9930273206  
 C -3.449038891 1.0675912157 0.7056281052

H -5.320717536 0.1370913243 0.1691180638  
H -4.704266063 -0.3176501432 1.7596277682  
O -1.3232940078 -2.0630412446 2.6242982395  
C -3.3752875914 1.9133389869 -0.4102759854  
C -2.5534931026 1.2756586354 1.7645874504  
C -2.4324292924 2.9407432255 -0.4656328734  
H -4.0600986336 1.7596575845 -1.2404181785  
C -1.6053840863 2.2993015748 1.7099675362  
H -2.5918716429 0.6269712017 2.6346944145  
C -1.5443053383 3.1371458629 0.5949229257  
H -2.3921315329 3.5893095554 -1.3360969851  
H -0.919186382 2.4451259151 2.5398286773  
H -0.8131902106 3.9378943054 0.554735369  
C -3.6305092569 -2.6264986715 2.7289243584  
H -3.3005797222 -3.4419700434 3.3774546899  
H -4.0312750286 -1.8349601973 3.3710766641  
H -4.4319319997 -2.9848613331 2.0811946764  
C 4.26881091 -0.3130813673 -0.8347426662  
C 5.4725196035 -0.9163354605 -1.1147306025  
H 4.0763386741 0.6934103348 -1.1884532762  
H 6.2244046722 -0.3804988667 -1.6859248645  
C 5.7403108456 -2.2336885333 -0.6669281747  
C 4.7920431407 -2.9293008221 0.0464168729  
H 6.6968132681 -2.6937762292 -0.8959881115  
H 4.984888577 -3.9432290814 0.3847473974

61

(S)-TS C,M=0,1 E=-1696.1981696 ZPE-Corr=0.470282 H-Corr-298=0.501406 G-Corr-298=0.408805 NImag=1 -1167.8095

C 2.1030073613 1.8898171038 0.2612082922  
C 1.6067923468 0.7366203328 -0.4002913155  
C 0.539717855 2.1233175073 -2.0313927902  
C 1.0573685494 3.2549454325 -1.4761753086  
C 1.8340199768 3.1813118021 -0.2926565631  
H 0.837755453 4.215065659 -1.9289885686  
C 1.9051447905 -0.6605226293 -0.0139304204  
C 3.2421153456 -1.1463307649 -0.1791608064  
C 0.8673977404 -1.5134865746 0.3740024059  
C 3.5046276349 -2.530398213 0.0971054413  
C 1.1635807405 -2.8872002269 0.6190189486  
C 2.4376730453 -3.3792637117 0.4911682762  
H 0.3587179134 -3.5357345362 0.9509193671  
H 2.6511841177 -4.4255018429 0.6927663832  
Pd -0.9710767426 -1.0525216614 -0.6396721609  
H -0.0464342917 -1.221318333 1.2618131903  
H -0.104838174 2.0895640912 -2.8984404088  
C 2.8475380586 1.7892925118 1.4665118612  
H 3.0399493551 0.8124789371 1.8946220426  
C 2.3275969088 4.333612239 0.3658833317  
H 2.1197734837 5.309873621 -0.0608873278  
C 3.0506162591 4.2075075265 1.5314150904  
H 3.4240148181 5.0928110004 2.0365929932  
C 3.3072498551 2.929270537 2.0852362744  
H 3.8692218223 2.850536774 3.0103775294  
N 0.814620784 0.8983887805 -1.4771584811  
O 0.2589033657 -0.1748272124 -2.0763104454  
O -2.6245567416 -0.970768394 -1.849145943  
C -3.7455673387 -1.2647053313 -1.2496081852  
C -3.7103726375 -1.4185770687 0.2753699836  
O -4.827010496 -1.3399696474 -1.8408146638  
N -2.3266487095 -1.6042733043 0.7272810999  
C -4.3561714018 -0.1311061955 0.8726741353  
H -4.3348521054 -2.2782551001 0.5382189255  
C -1.9909819825 -1.6994011354 2.0004990693  
C -3.5579309405 1.115655004 0.5744861575  
H -5.3613323736 -0.0571036083 0.4473694989  
H -4.4656274131 -0.2612334632 1.951288771  
O -0.7846095354 -1.4832805271 2.3826392179  
C -3.7893799787 1.845481268 -0.5996165643  
C -2.5287625839 1.5340949757 1.4305404214  
C -3.0165007245 2.9658811651 -0.908822011  
H -4.5810053496 1.5300916512 -1.2741513782  
C -1.7485253809 2.649586481 1.1214030703  
H -2.3340339228 0.9859476685 2.3474045913  
C -1.9941451799 3.3717817454 -0.0483655301  
H -3.2165071663 3.5239917986 -1.8193193892  
H -0.9559646788 2.9585891305 1.7972167222

H -1.3981281868 4.2476449884 -0.2834969332  
 C -2.9702621223 -2.0886803351 3.0773881748  
 H -2.4961574419 -2.8554342947 3.6963825539  
 H -3.171490664 -1.2251842127 3.7191060522  
 H -3.9122138586 -2.4727716661 2.6863908131  
 C 4.3183905409 -0.335073734 -0.6401124348  
 C 5.5856065281 -0.8541028372 -0.7766656798  
 H 4.1394395135 0.7028760505 -0.8934617295  
 H 6.3922465368 -0.2180811041 -1.1286410723  
 C 5.8472695813 -2.2107266802 -0.4681742391  
 C 4.8254257246 -3.0300471444 -0.046733959  
 H 6.8537093102 -2.6034191305 -0.5775747435  
 H 5.0092358066 -4.0774481623 0.1752663675

61

(S)-C C.M=0,1 E=-1696.2239266 ZPE-Corr=0.475980 H-Corr-298=0.507527 G-Corr-298=0.413857 NImag=0

C 2.0274370941 1.9463788082 -0.0432036052  
 C 1.5564518476 0.7585035194 -0.67435382  
 C 0.4889873349 2.0975851923 -2.3526876407  
 C 1.0286990098 3.2458011471 -1.8584989912  
 C 1.7876349731 3.2132453381 -0.6614733294  
 H 0.8226836984 4.1877489858 -2.3538745928  
 C 1.8557715512 -0.6178204482 -0.231863406  
 C 3.2285053915 -1.0323657989 -0.0961647871  
 C 0.8059983704 -1.5258607366 -0.0584263238  
 C 3.4954903359 -2.3769865427 0.3257654533  
 C 1.1148025185 -2.8634935582 0.3124793505  
 C 2.4125545698 -3.2678427457 0.5277211759  
 H 0.3067825261 -3.5763609894 0.4473169708  
 H 2.6264498863 -4.2893593557 0.8320938195  
 Pd -1.0029060402 -1.0336882066 -0.772548456  
 H -0.2300027639 -1.6395679645 1.7033701335  
 H -0.1651449682 2.0326487674 -3.2110173041  
 C 2.6898565197 1.9076051324 1.2131829842  
 H 2.8434793978 0.9556992877 1.705792465  
 C 2.2558494613 4.3939734624 -0.0351497904  
 H 2.0740007423 5.3488828934 -0.5185024311  
 C 2.9080736045 4.3246515673 1.175695369  
 H 3.2562518779 5.2324159194 1.6585738573  
 C 3.1133044498 3.0744600479 1.8077511691  
 H 3.6060018099 3.0374649099 2.7741863275  
 N 0.7461261107 0.8954346101 -1.7437992131  
 O 0.1330926669 -0.1818609196 -2.2818146597  
 O -2.7905982134 -0.71636022 -1.8297083522  
 C -3.8677826645 -0.9535249253 -1.1587193593  
 C -3.7245599977 -1.2465081396 0.3394909957  
 O -5.013966121 -0.8859826106 -1.6270328779  
 N -2.3338679827 -1.5926166444 0.7048176391  
 C -4.1933608861 0.0232830594 1.1078684346  
 H -4.4023150532 -2.0712146547 0.5742722317  
 C -2.0826242609 -2.0017875632 1.9054935053  
 C -3.2774048479 1.2048996948 0.8929441836  
 H -5.2045022809 0.2454150453 0.755282536  
 H -4.2607146845 -0.21220067 2.1725345253  
 O -0.8330373908 -2.045010072 2.3649447894  
 C -3.4566015582 2.0553397719 -0.206709789  
 C -2.1932429217 1.437588383 1.75114246  
 C -2.5769665086 3.1133380243 -0.4407480191  
 H -4.2911421141 1.884284412 -0.8814943187  
 C -1.3084698345 2.4920756589 1.517795337  
 H -2.0389008237 0.7879004772 2.608567941  
 C -1.5021653769 3.3364283023 0.4225382521  
 H -2.7336038464 3.766050198 -1.295048517  
 H -0.4721949561 2.6572984366 2.1913481157  
 H -0.822663292 4.163688275 0.2473847415  
 C -3.0671377673 -2.4603439324 2.9330806913  
 H -2.6647083865 -3.3585452951 3.4097299593  
 H -3.1700896006 -1.6941188645 3.7083416498  
 H -4.046598388 -2.6807841766 2.5134258506  
 C 4.3437853375 -0.2056475953 -0.4143621337  
 C 5.6345406553 -0.6606296057 -0.259856985  
 H 4.1817804183 0.7935830071 -0.7982990682  
 H 6.4652729217 -0.0083891894 -0.5133531413  
 C 5.8911501003 -1.9683761957 0.2156464902  
 C 4.838765314 -2.8093165776 0.4922028431  
 H 6.9149166202 -2.3081575755 0.3403808501

H 5.0147475851 -3.8278453433 0.8275585204

## 9. XRD data

### XRD data for compound **3g**

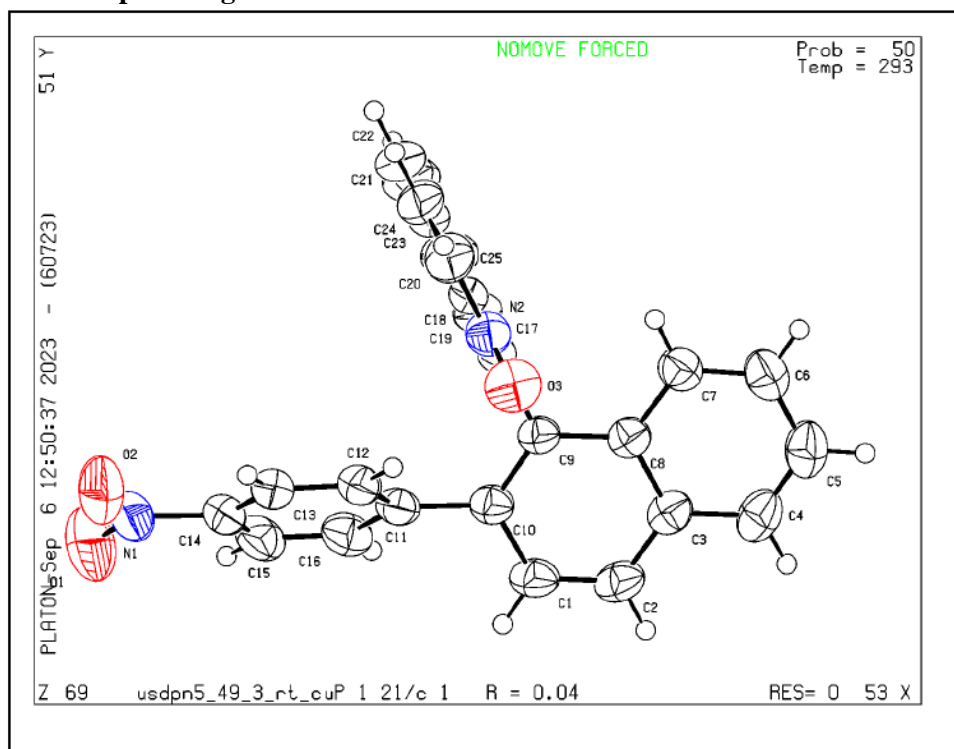

ORTEP Diagram of **3g**. Ellipsoids displayed at 50% probability.

#### Crystal data and structure refinement

|                                    |                                                               |
|------------------------------------|---------------------------------------------------------------|
| Identification code                | USDPN5_49_3_Rt_Cu                                             |
| Empirical formula                  | C <sub>25</sub> H <sub>16</sub> N <sub>2</sub> O <sub>3</sub> |
| Formula weight                     | 392.40                                                        |
| Temperature/K                      | 293(2)                                                        |
| Crystal system                     | monoclinic                                                    |
| Space group                        | P21/c                                                         |
| a/Å                                | 11.8307(6)                                                    |
| b/Å                                | 9.9076(4)                                                     |
| c/Å                                | 16.8625(7)                                                    |
| α/°                                | 90                                                            |
| β/°                                | 105.681(5)                                                    |
| γ/°                                | 90                                                            |
| Volume/Å <sup>3</sup>              | 1902.95(15)                                                   |
| Z                                  | 4                                                             |
| ρ <sub>calc</sub> /cm <sup>3</sup> | 1.370                                                         |
| μ/mm <sup>-1</sup>                 | 0.739                                                         |
| F(000)                             | 816.0                                                         |
| Crystal size/mm <sup>3</sup>       | 0.246 × 0.231 × 0.165                                         |
| Radiation                          | Cu Kα (λ = 1.54184)                                           |
| 2θ range for data collection/°     | 7.762 to 138.178                                              |
| Index ranges                       | -14 ≤ h ≤ 14, -11 ≤ k ≤ 5, -19 ≤ l ≤ 20                       |
| Reflections collected              | 5509                                                          |

Independent reflections 3471 [Rint = 0.0208, Rsigma = 0.0300]  
 Data/restraints/parameters 3471/0/271  
 Goodness-of-fit on F2 1.037  
 Final R indexes [ $I \geq 2\sigma(I)$ ] R1 = 0.0443, wR2 = 0.1200  
 Final R indexes [all data] R1 = 0.0550, wR2 = 0.1329  
 Largest diff. peak/hole / e  $\text{\AA}^{-3}$  0.15/-0.18

### Bond Lengths

| Atom | Atom | Length/ $\text{\AA}$ | Atom | Atom | Length/ $\text{\AA}$ |
|------|------|----------------------|------|------|----------------------|
| O3   | N2   | 1.304(2)             | C3   | C2   | 1.409(3)             |
| N2   | C17  | 1.342(2)             | C3   | C4   | 1.414(3)             |
| N2   | C25  | 1.393(2)             | C10  | C1   | 1.423(2)             |
| C17  | C18  | 1.423(2)             | C12  | C13  | 1.380(2)             |
| C17  | C9   | 1.490(2)             | C7   | C6   | 1.363(3)             |
| C18  | C23  | 1.423(2)             | C2   | C1   | 1.348(3)             |
| C18  | C19  | 1.406(2)             | C13  | C14  | 1.380(3)             |
| C9   | C8   | 1.428(2)             | C23  | C24  | 1.408(3)             |
| C9   | C10  | 1.382(2)             | C23  | C22  | 1.413(3)             |
| C8   | C3   | 1.426(2)             | C19  | C20  | 1.369(3)             |
| C8   | C7   | 1.414(2)             | C25  | C24  | 1.341(3)             |
| N1   | O2   | 1.215(3)             | C14  | C15  | 1.377(3)             |
| N1   | O1   | 1.208(3)             | C4   | C5   | 1.354(3)             |
| N1   | C14  | 1.468(3)             | C16  | C15  | 1.374(3)             |
| C11  | C10  | 1.488(2)             | C6   | C5   | 1.405(3)             |
| C11  | C12  | 1.396(2)             | C20  | C21  | 1.394(3)             |
| C11  | C16  | 1.397(2)             | C22  | C21  | 1.353(3)             |

### Bond Angles

| Atom | Atom | Atom | Angle/ $^\circ$ | Atom | Atom | Atom | Angle/ $^\circ$ |
|------|------|------|-----------------|------|------|------|-----------------|
| O3   | N2   | C17  | 121.59(14)      | C9   | C10  | C1   | 119.28(15)      |
| O3   | N2   | C25  | 117.97(15)      | C1   | C10  | C11  | 118.90(14)      |
| C17  | N2   | C25  | 120.42(16)      | C13  | C12  | C11  | 121.21(16)      |
| N2   | C17  | C18  | 119.89(14)      | C6   | C7   | C8   | 120.96(17)      |
| N2   | C17  | C9   | 118.39(14)      | C1   | C2   | C3   | 121.27(15)      |
| C18  | C17  | C9   | 121.68(14)      | C14  | C13  | C12  | 118.19(18)      |
| C17  | C18  | C23  | 119.69(15)      | C24  | C23  | C18  | 117.33(17)      |
| C19  | C18  | C17  | 121.86(14)      | C24  | C23  | C22  | 123.76(17)      |
| C19  | C18  | C23  | 118.45(16)      | C22  | C23  | C18  | 118.91(18)      |
| C8   | C9   | C17  | 118.61(13)      | C20  | C19  | C18  | 120.72(17)      |
| C10  | C9   | C17  | 120.75(14)      | C2   | C1   | C10  | 121.20(15)      |
| C10  | C9   | C8   | 120.38(14)      | C24  | C25  | N2   | 121.53(17)      |
| C3   | C8   | C9   | 118.87(14)      | C13  | C14  | N1   | 118.1(2)        |
| C7   | C8   | C9   | 122.62(14)      | C15  | C14  | N1   | 119.67(18)      |
| C7   | C8   | C3   | 118.50(15)      | C15  | C14  | C13  | 122.24(17)      |
| O2   | N1   | C14  | 118.8(2)        | C5   | C4   | C3   | 121.15(18)      |
| O1   | N1   | O2   | 123.5(2)        | C25  | C24  | C23  | 121.12(17)      |
| O1   | N1   | C14  | 117.7(3)        | C15  | C16  | C11  | 120.72(19)      |
| C12  | C11  | C10  | 120.41(14)      | C7   | C6   | C5   | 120.36(18)      |
| C12  | C11  | C16  | 118.58(16)      | C16  | C15  | C14  | 119.02(17)      |
| C16  | C11  | C10  | 120.93(16)      | C4   | C5   | C6   | 120.40(18)      |

|    |     |     |            |     |     |     |            |
|----|-----|-----|------------|-----|-----|-----|------------|
| C2 | C3  | C8  | 118.97(15) | C19 | C20 | C21 | 120.6(2)   |
| C2 | C3  | C4  | 122.40(16) | C21 | C22 | C23 | 120.91(18) |
| C4 | C3  | C8  | 118.63(16) | C22 | C21 | C20 | 120.4(2)   |
| C9 | C10 | C11 | 121.76(14) |     |     |     |            |

## 10. References

- Gao, D. W.; Gu, Q.; You, S. L., Pd(II)-Catalyzed Intermolecular Direct C-H Bond Iodination: An Efficient Approach Toward the Synthesis of Axially Chiral Compounds via Kinetic Resolution. *ACS Catal.* **2014**, *4*, 2741-2745.
- Gaussian 16, Revision A.03, Frisch, M. J.; Trucks, G. W.; Schlegel, H. B.; Scuseria, G. E.; Robb, M. A.; Cheeseman, J. R.; Scalmani, G.; Barone, V.; Petersson, G. A.; Nakatsuji, H.; Li, X.; Caricato, M.; Marenich, A. V.; Bloino, J.; Janesko, B. G.; Gomperts, R.; Mennucci, B.; Hratchian, H. P.; Ortiz, J. V.; Izmaylov, A. F.; Sonnenberg, J. L.; Williams-Young, D.; Ding, F.; Lipparini, F.; Egidi, F.; Goings, J.; Peng, B.; Petrone, A.; Henderson, T.; Ranasinghe, D.; Zakrzewski, V. G.; Gao, J.; Rega, N.; Zheng, G.; Liang, W.; Hada, M.; Ehara, M.; Toyota, K.; Fukuda, R.; Hasegawa, J.; Ishida, M.; Nakajima, T.; Honda, Y.; Kitao, O.; Nakai, H.; Vreven, S.; Throssell, K.; Montgomery, J. A., Jr.; Peralta, J. E.; Ogliaro, F.; Bearpark, M. J.; Heyd, J. J.; Brothers, E. N.; Kudin, K. N.; Staroverov, V. N.; Keith, T. A.; Kobayashi, R.; Normand, J.; Raghavachari, K.; Rendell, A. P.; Burant, J. C.; Iyengar, S. S.; Tomasi, J.; Cossi, M.; Millam, J. M.; Klene, M.; Adamo, C.; Cammi, R.; Ochterski, J. W.; Martin, R. L.; Morokuma, K.; Farkas, O.; Foresman, J. B.; Fox, D. J. Gaussian, Inc., Wallingford CT, 2016.
- (a) Lee, C.; Yang, W.; Parr, R.G., Development of the Colle-Salvetti Correlation Energy Formula into a Functional of the Electron Density. *Phys. Rev. B* 1988, *37*, 785. (b) Beck, A.D., Density-Functional Thermochemistry. III. The Role of Exact Exchange. *J. Chem. Phys.* 1993, *98*, 5648.
- (a) Grimme, S.; Antony, J.; Ehrlich, S.; Krieg, H. A Consistent and Accurate Ab initio Parametrization of Density Functional Dispersion Correction (DFT-D) for the 94 Elements H-Pu. *J. Chem. Phys.* 2010, *132*, 154104. (b) Grimme, S.; Ehrlich, S.; Goerigk, L. Effect of the Damping Function in Dispersion Corrected Density Functional Theory. *J. Comput. Chem.* 2011, *32*, 1456-1465.
- Dolg, M.; Wedig, U.; Stoll, H.; Preuss, H.; Energy-Adjusted Abinitio Pseudopotentials for the First Row Transition Elements. *J. Chem. Phys.* 1987, *86*, 866-872.
- (a) Ditchfield, R.H.W.J.; Hehre, W.J.; Pople, J.A.; Self-Consistent Molecular-Orbital Methods. IX. An Extended Gaussian-Type Basis for Molecular-Orbital Studies of



- Organic Molecules. *J. Chem. Phys.* 1971, 54, 724. (b) Hehre, W.J.; Ditchfield, R.; Pople, J.A., Type Basis Sets for Use in Molecular Orbital Studies of Organic Molecules. *J. Chem. Phys.* 1972, 56, 1972, 2257. (c) Hariharan, P.C.; Pople, J.A., The Influence of Polarization Functions on Molecular Orbital Hydrogenation Energies. *Theor. Chem. Acc.* 1973, 28, 213-222.
7. (a) Marenich, A.V.; Cramer, C.J.; Truhlar, D.G., Universal Solvation Model Based on Solute Electron Density and on a Continuum Model of the Solvent Defined by the Bulk Dielectric Constant and Atomic Surface Tensions. *J. Phys. Chem. B.* 2009, 113, 6378-6396. (b) Cossi, M.; Barone, V.; Cammi, R.; Tomasi, J., Ab Initio Study of Solvated Molecules: A New Implementation of the Polarizable Continuum Model. *Chem. Phys. Lett.* 1996, 255, 327- 335. (c) Cancès, E.; Mennucci, B.; Tomasi, J., A New Integral Equation Formalism for the Polarizable Continuum Model: Theoretical Background and Applications to Isotropic and Anisotropic Dielectrics. *J. Chem. Phys.* 1997, 107, 3032-3041. (d) Scalmani, G.; Frisch, M.J., Continuous Surface Charge Polarizable Continuum Models of Solvation. I. General formalism. *J. Chem. Phys.* 2010, 132, 114110. (e) Tomasi, J.; Mennucci, B.; Cammi, R., Quantum Mechanical Continuum Solvation Models. *Chem. Rev.* 2005, 105, 2999-3093.
8. K.A. Peterson, D. Figgen, M. Dolg, H. Stoll, *J. Chem. Phys.* 126, 124101 (2007).
9. <https://www.tc.uni-koeln.de/PP/clickpse.en.html>
10. Grimme, S., Supramolecular Binding Thermodynamics by Dispersion-Corrected Density Functional Theory. *Chem. Eur. J.* 2012, 18, 9955-9964.
11. Luchini, G.; Alegre-Requena, J.V.; Funes-Ardoiz, I.; Paton, R.S., GoodVibes: Automated Thermochemistry for Heterogeneous Computational Chemistry Data. *F1000Research.* 2020, 9, 291.
12. PyMOL(TM) Molecular Graphics System, Version 2.4.0.
13. For details of the parameter used for HFIP solvent see following paper. Capdevila, L.; Montilla, M.; Planas, O.; Brotons, A.; Salvador, P.; Martin-Diaconescu, V.; Parella, T.; Luis, J. M.; Ribas, X. Csp<sup>2</sup>-H Amination Reactions Mediated by Metastable Pseudo-Oh Masked Aryl-CoIII-nitrene Species. *Inorg. Chem.* 2022, 61, 35, 14075–14085.
14. Yan, J.-L.; Maiti, R.; Ren, S.-C.; Tian, W.; Li, T.; Xu, J.; Mondal, B.; Jin, Z.; Chi, Y. R. Carbene-catalyzed atroposelective synthesis of axially chiral styrenes. *Nat. Commun.* **2022**, *13*, 84.
